# Supplementary material for: Profiling and Bioinformatics Analysis of Differentially Expressed circRNAs in Spinal Ligament Tissues of Patients with Ankylosing Spondylitis
Source: Biomed Res Int. 2020 Jun 14;2020:7165893. doi: 10.1155/2020/7165893 (PMC7313148; doi:10.1155/2020/7165893)
Supplement: Supplementary Materials — Sequencing identified a total of 1,172 circRNAs, and the details on total circRNA expression profiling were shown in supplementary data. [file 7165893.f1.xlsx]

## Sheet: CircRNA expression profiling   
Chr_Start_End_Strand	circBankID	circbaseID	splicedSeqLength	Gene symbol	startEndRegion	log2FC	P-Value	pAdj	regulation	C1	C2	C3	AS1	AS2	AS3
chr11_92085261_92088570_+	hsa_circFAT3_006	hsa_circ_0000348	3309	FAT3	exon-exon	3.7819	2.46042e-05	0.00576722	up	0.0322086	0	0.16003	0.0415659	2.60821	0.351428
chr13_76195898_76335174_+	NA	NA		LMO7	exon-exon	3.15268	0.000532198	0.0639043	up	0	0.0186919	0.016003	0.124698	0.153424	0.15974
chrX_147743428_147744289_+	hsa_circAFF2_005	hsa_circ_0001947	861	AFF2	exon-exon	2.94904	1.25697e-07	4.91058e-05	up	0.0644173	0.0373838	0.16003	0.540356	0.575339	1.08623
chr8_13356557_13357705_-	hsa_circDLC1_002	hsa_circ_0135780	1148	DLC1	exon-exon	2.38651	0.000545258	0.0639043	up	0.0966259	0	0.0640121	0.290961	0.230136	0.287532
chr2_200233327_200298237_-	hsa_circSATB2_015	hsa_circ_0003915	531	SATB2	exon-exon	2.27782	0.00126915	0.114419	up	0.128835	0.0747676	0.0640121	0.0415659	0.882187	0.351428
chr9_4286037_4286523_-	hsa_circGLIS3_003	hsa_circ_0002874	486	GLIS3	exon-exon	2.1186	1.59682e-05	0.00467868	up	0.257669	0.112151	0.192036	1.12228	0.767119	0.543116
chr12_122825299_122826244_-	hsa_circCLIP1_019	hsa_circ_0029069	945	CLIP1	exon-exon	2.02727	7.35295e-05	0.0123109	up	0.0644173	0.0934594	0.192036	0.540356	0.421916	0.607012
chr3_18419661_18462483_-	hsa_circSATB1_004	hsa_circ_0064555	1599	SATB1	exon-exon	1.98182	0.00841734	0.227843	up	0.0322086	0.0934594	0.016003	0.332527	0.153424	0.127792
chr21_36206706_36231875_-	hsa_circRUNX1_005	hsa_circ_0002360	297	RUNX1	exon-exon	1.89791	0.00658035	0.215444	up	0.193252	0.0373838	0.0320061	0.207829	0.19178	0.447272
chr9_37424841_37426651_+	hsa_circGRHPR_002	hsa_circ_0001861	321	GRHPR	exon-exon	1.81587	0.00077716	0.0828029	up	0.386504	0.373838	0.416079	1.12228	0.38356	2.65168
chr10_126631025_126631876_+	hsa_circZRANB1_005	hsa_circ_0000268	851	ZRANB1	exon-exon	1.81431	0.0143726	0.317824	up	0.0644173	0.112151	0.0960182	0.831317	0.153424	0.063896
chr7_90355880_90419967_+	hsa_circCDK14_009	hsa_circ_0008645	421	CDK14	exon-exon	1.80922	0.0140334	0.316291	up	0.128835	0.0560757	0.0320061	0.124698	0.115068	0.447272
chr6_118832460_118887479_-	hsa_circCEP85L_009	hsa_circ_0077736	1025	CEP85L	exon-exon	1.80306	0.00398138	0.160903	up	0.0966259	0.0560757	0.0800151	0.374093	0.268492	0.191688
chr12_129299319_129299615_-	hsa_circSLC15A4_002	hsa_circ_0000462	296	SLC15A4	exon-exon	1.78129	0.00899657	0.234311	up	0.0322086	0.0747676	0.0480091	0.124698	0.230136	0.223636
chr10_70719561_70720005_+	hsa_circDDX21_003	hsa_circ_0008865	444	DDX21	exon-exon	1.77097	0.00253954	0.142608	up	0.0322086	0.130843	0.112021	0.457225	0.38356	0.223636
chr17_2297336_2298748_-	hsa_circMNT_002	hsa_circ_0106416	734	MNT	exon-exon	1.67321	0.0200886	0.347541	up	0.0322086	0.0560757	0.0480091	0.124698	0.19178	0.15974
chr4_41015599_41016415_-	hsa_circAPBB2_013	hsa_circ_0005991	816	APBB2	exon-exon	1.65777	0.0241833	0.363773	up	0.0322086	0.0560757	0.112021	0.0415659	0.19178	0.447272
chr1_227192694_227204751_-	hsa_circCDC42BPA_072	hsa_circ_0016733	360	CDC42BPA	exon-exon	1.65304	0.0352534	0.420561	up	0	0.0373838	0.128024	0.0415659	0.38356	0.191688
chr19_17212469_17213367_+	hsa_circMYO9B_003	hsa_circ_0000907	898	MYO9B	exon-exon	1.65212	0.0280447	0.382191	up	0	0.130843	0.0480091	0.290961	0.306848	0.063896
chrY_7209155_7239930_+	hsa_circPRKY_004	hsa_circ_0006322	441	PRKY	exon-exon	1.64629	0.0242072	0.363773	up	0.0322086	0	0.224042	0.166263	0.38356	0.351428
chr8_22332466_22333137_+	hsa_circPPP3CC_001	hsa_circ_0083619	323	PPP3CC	exon-exon	1.64112	0.0176818	0.34408	up	0.0966259	0.0186919	0.0960182	0.332527	0.115068	0.223636
chr17_80521229_80526077_+	hsa_circFOXK2_007	hsa_circ_0000816	343	FOXK2	exon-exon	1.63002	0.00815719	0.227843	up	0.0644173	0.0560757	0.112021	0.290961	0.230136	0.255584
chr9_35546426_35548532_+	hsa_circRUSC2_002	hsa_circ_0002702	2106	RUSC2	exon-exon	1.62202	0.00381617	0.160903	up	0.0966259	0.168227	0.0960182	0.290961	0.268492	0.575064
chr18_77170402_77171501_+	hsa_circNFATC1_001	hsa_circ_0048023	1099	NFATC1	exon-exon	1.58914	0.0229233	0.363773	up	0.0322086	0.130843	0.0320061	0.249395	0.268492	0.127792
chrY_21749095_21749393_+	hsa_circTXLNG2P_002	hsa_circ_0009024	298	TXLNGY	exon-exon	1.58224	0.0146698	0.318389	up	0.128835	0	0.192036	0.332527	0.306848	0.351428
chr8_131370262_131374017_-	hsa_circASAP1_014	hsa_circ_0085616	229	ASAP1	exon-exon	1.55681	0.0186426	0.34408	up	0.257669	0.0934594	0.0320061	0.540356	0.345204	0.15974
chr21_38792600_38802702_+	hsa_circDYRK1A_009	hsa_circ_0006062	10102	DYRK1A	exon-intergenic	1.55629	0.0425419	0.439916	up	0.128835	0	0.0640121	0.249395	0.19178	0.095844
chr4_186168447_186188309_+	hsa_circSNX25_005	hsa_circ_0004874	662	SNX25	exon-exon	1.5239	0.0207576	0.347541	up	0.0644173	0.0560757	0.0960182	0.124698	0.345204	0.191688
chr7_104702610_104707254_+	hsa_circMLL5_017	hsa_circ_0081813	426	KMT2E	exon-exon	1.50436	0.0295734	0.391099	up	0.0966259	0.0747676	0.0320061	0.166263	0.268492	0.127792
chr8_22054192_22054933_+	hsa_circBMP1_007	hsa_circ_0002075	342	BMP1	exon-exon	1.49287	0.00855385	0.227843	up	0.0966259	0.130843	0.128024	0.166263	0.38356	0.47922
chr7_65705311_65706257_+	hsa_circTPST1_002	hsa_circ_0007672	946	TPST1	exon-exon	1.44742	0.0126573	0.296096	up	0.161043	0.0560757	0.128024	0.374093	0.306848	0.255584
chr8_141810557_141900868_-	hsa_circPTK2_026	hsa_circ_0007521	1125	PTK2	exon-exon	1.44694	0.0329092	0.419235	up	0.0322086	0.0560757	0.0800151	0.166263	0.153424	0.191688
chr3_171969049_171979873_+	hsa_circFNDC3B_036	hsa_circ_0122728	10824	FNDC3B	exon-intergenic	1.44494	0.00499328	0.177337	up	0.161043	0.130843	0.272051	0.249395	0.767119	0.575064
chr14_105412025_105412520_-	hsa_circAHNAK2_001	hsa_circ_0101406		AHNAK2	exon-exon	1.44085	0.0180244	0.34408	up	0	0.112151	0.208039	0.457225	0.268492	0.287532
chr7_65705311_65751696_+	hsa_circTPST1_004	hsa_circ_0006041	1145	TPST1	exon-exon	1.36415	0.00438421	0.169932	up	0.354295	0.130843	0.208039	0.540356	0.498628	0.670908
chr12_12022357_12022903_+	hsa_circETV6_004	hsa_circ_0004123	546	ETV6	exon-exon	1.36356	0.0373241	0.437439	up	0.0966259	0.0747676	0.0480091	0.207829	0.153424	0.191688
chr16_31102095_31102663_-	hsa_circVKORC1_005	hsa_circ_0006719	568	VKORC1	intergenic-exon	1.35986	0.00685854	0.215444	up	0.257669	0.168227	0.304058	0.249395	0.767119	0.862596
chr3_195686053_195686957_-	hsa_circSDHAP1_005	hsa_circ_0002174	904	SDHAP1	intergenic-exon	1.34028	0.01937	0.347153	up	0.0966259	0.0934594	0.144027	0.290961	0.38356	0.223636
chr7_30590251_30601744_-	hsa_circTCONS_00012989_001	hsa_circ_0001693	11493	LOC401320	exon-exon	1.32025	0.0432079	0.439916	up	0.0644173	0.130843	0.112021	0.166263	0.115068	0.511168
chr9_98740342_98766983_+	hsa_circ_chr9_00029	hsa_circ_0008720	26641	ERCC6L2	exon-exon	1.30102	0.0257911	0.363773	up	0.128835	0.0934594	0.144027	0.457225	0.153424	0.31948
chr4_106155053_106158508_+	hsa_circTET2_005	hsa_circ_0070562	3455	TET2	exon-exon	1.27918	0.00279861	0.142608	up	0.257669	0.336454	0.352067	0.872883	0.805475	0.702856
chr2_8910799_8917022_-	hsa_circKIDINS220_037	hsa_circ_0005315	308	KIDINS220	exon-exon	1.26614	0.0435412	0.439916	up	0.0966259	0.0934594	0.0800151	0.124698	0.306848	0.223636
chr12_95602618_95605043_-	hsa_circFGD6_001	hsa_circ_0099549	2425	FGD6	exon-exon	1.26113	0.0354523	0.420561	up	0.0966259	0.186919	0.0640121	0.374093	0.268492	0.223636
chr14_89041036_89044484_+	hsa_circZC3H14_006	hsa_circ_0003164	418	ZC3H14	exon-exon	1.23975	0.0399186	0.439916	up	0.0644173	0.149535	0.0800151	0.249395	0.230136	0.255584
chr10_128768965_128788867_+	hsa_circDOCK1_006	hsa_circ_0007142	427	DOCK1	exon-exon	1.23893	0.0128847	0.296096	up	0.193252	0.186919	0.16003	0.249395	0.613695	0.415324
chr1_115005725_115007010_-	hsa_circTRIM33_006	hsa_circ_0004127	397	TRIM33	exon-exon	1.23165	0.0170065	0.34408	up	0.289878	0.0747676	0.192036	0.49879	0.38356	0.383376
chr4_73956383_73958017_-	hsa_circANKRD17_046	hsa_circ_0007883	1634	ANKRD17	exon-exon	1.23046	0.00349606	0.157592	up	0.547547	0.523373	0.448085	1.16384	1.57259	0.862596
chr16_31733946_31734674_+	hsa_circZNF720_002	hsa_circ_0007059	223	ZNF720	exon-exon	1.22817	0.0473761	0.464535	up	0.161043	0.0560757	0.0960182	0.290961	0.230136	0.191688
chr21_37619814_37620866_+	hsa_circDOPEY2_023	hsa_circ_0001187	301	DOPEY2	exon-exon	1.22613	0.0119993	0.293948	up	0.193252	0.242995	0.176033	0.540356	0.652051	0.287532
chr5_176963358_176966148_-	hsa_circFAM193B_003	hsa_circ_0002972	866	FAM193B	exon-exon	1.20169	0.0418199	0.439916	up	0.0966259	0.0747676	0.16003	0.207829	0.268492	0.31948
chr9_128419929_128434922_-	hsa_circMAPKAP1_004	hsa_circ_0001890	567	MAPKAP1	exon-exon	1.15045	0.0411354	0.439916	up	0.161043	0.112151	0.128024	0.249395	0.421916	0.223636
chr19_13039155_13039661_-	hsa_circFARSA_007	hsa_circ_0000896	338	FARSA	exon-exon	1.14959	0.0414804	0.439916	up	0.0322086	0.149535	0.240045	0.457225	0.345204	0.255584
chr11_120343758_120348235_+	hsa_circARHGEF12_071	hsa_circ_0009021	577	ARHGEF12	exon-exon	1.12026	0.0231742	0.363773	up	0.128835	0.224303	0.192036	0.249395	0.536983	0.447272
chr7_97820039_97823884_+	hsa_circLMTK2_014	hsa_circ_0001725	3109	LMTK2	exon-exon	1.0291	0.038619	0.439916	up	0.22546	0.112151	0.240045	0.457225	0.421916	0.31948
chr5_65349233_65350779_+	hsa_circERBB2IP_039	hsa_circ_0072732	1546	ERBB2IP	exon-exon	1.0021	0.0408602	0.439916	up	0.289878	0.130843	0.400076	0.540356	0.421916	0.702856
chr3_114069120_114070725_-	hsa_circZBTB20_023	hsa_circ_0005332	1605	ZBTB20	exon-exon	0.793308	0.042228	0.439916	up	0.837425	0.859827	0.928176	1.62107	1.68766	1.30987
chr7_99621041_99621930_+	hsa_circZKSCAN1_005	hsa_circ_0001727	668	ZKSCAN1	exon-exon	0.769616	0.0489421	0.464535	up	0.901842	0.766367	0.816154	1.41324	1.3041	1.5335
chr6_136472297_136476896_+	hsa_circPDE7B_005	hsa_circ_0002198	329	PDE7B	exon-exon	1.51258	0.109015	0.63468	no significant	0	0.168227	0	0	0.230136	0.287532
chr21_46548316_46554747_+	hsa_circADARB1_004	hsa_circ_0005037	290	ADARB1	exon-exon	1.41958	0.0545908	0.464535	no significant	0.0322086	0.0186919	0.16003	0.249395	0.306848	0.095844
chr9_123924133_123928458_+	hsa_circCNTRL_024	hsa_circ_0088333	566	CNTRL	exon-exon	1.39544	0.0735416	0.532843	no significant	0.0322086	0.0373838	0.112021	0.332527	0.19178	0.031948
chr17_45479497_45492285_+	hsa_circC17orf57_017	hsa_circ_0000778	549	EFCAB13	exon-exon	1.39097	0.0532776	0.464535	no significant	0.193252	0	0.176033	0.49879	0.0767119	0.383376
chr5_38991050_39003724_-	hsa_circRICTOR_009	hsa_circ_0006157	388	RICTOR	exon-exon	1.33452	0.0912058	0.589605	no significant	0.128835	0.0373838	0.0480091	0	0.306848	0.191688
chr9_36352738_36353328_-	hsa_circRNF38_027	hsa_circ_0008698	269	RNF38	exon-exon	1.327	0.065368	0.500727	no significant	0.128835	0.0934594	0.016003	0.290961	0.115068	0.15974
chr1_14104912_14109326_+	hsa_circPRDM2_011	hsa_circ_0010029	4414	PRDM2	exon-exon	1.28701	0.0673325	0.50912	no significant	0.0966259	0.0560757	0.128024	0.124698	0.498628	0.095844
chr18_66564455_66564919_+	hsa_circCCDC102B_004	hsa_circ_0007342	464	CCDC102B	exon-intergenic	1.28511	0.140585	0.675269	no significant	0.0322086	0.186919	0	0.374093	0.038356	0.15974
chr1_225140371_225161855_+	hsa_circDNAH14_002	hsa_circ_0016600	863	DNAH14	exon-exon	1.28046	0.0590779	0.484191	no significant	0.0322086	0.0373838	0.144027	0.207829	0.19178	0.191688
chr10_103552595_103567658_-	hsa_circMGEA5_029	hsa_circ_0019606	1695	MGEA5	exon-exon	1.2784	0.139403	0.672349	no significant	0.128835	0	0.0320061	0.124698	0.153424	0.063896
chr2_224862831_224866639_-	hsa_circSERPINE2_001	hsa_circ_0001103	509	SERPINE2	exon-exon	1.27106	0.064822	0.499812	no significant	0.128835	0.112151	0.0800151	0.0415659	0.19178	0.511168
chr1_213251037_213290752_+	hsa_circRPS6KC1_011	hsa_circ_0004849	331	RPS6KC1	exon-exon	1.26352	0.0880591	0.583081	no significant	0.0966259	0.130843	0.016003	0.166263	0.0767119	0.31948
chr9_110062421_110074018_+	hsa_circRAD23B_006	hsa_circ_0008812	487	RAD23B	exon-exon	1.25068	0.110866	0.63468	no significant	0.0322086	0.0560757	0.112021	0	0.153424	0.351428
chr12_82763165_82796909_+	NA	NA		METTL25	intergenic-exon	1.24376	0.0531796	0.464535	no significant	0	0.130843	0.112021	0.249395	0.230136	0.191688
chr1_111690263_111703918_+	hsa_circCEPT1_006	hsa_circ_0000106	702	CEPT1	exon-exon	1.23931	0.12141	0.649739	no significant	0	0.0747676	0.16003	0.415659	0	0.223636
chr15_101775286_101775782_-	hsa_circCHSY1_001	hsa_circ_0005019	496	CHSY1	exon-exon	1.21826	0.0597659	0.485769	no significant	0.0322086	0.149535	0.0640121	0.207829	0.19178	0.223636
chr19_47919908_47920607_-	hsa_circMEIS3_005	hsa_circ_0003449	384	MEIS3	exon-exon	1.21418	0.0766871	0.548032	no significant	0	0.0747676	0.112021	0.166263	0.19178	0.15974
chr4_54292038_54310270_+	hsa_circFIP1L1_026	hsa_circ_0001413	389	FIP1L1	exon-exon	1.21057	0.130014	0.655176	no significant	0	0.112151	0.0640121	0	0.230136	0.223636
chr2_165548730_165552346_-	hsa_circCOBLL1_007	hsa_circ_0117890	1745	COBLL1	exon-exon	1.20664	0.0531608	0.464535	no significant	0.0322086	0.112151	0.208039	0.49879	0.268492	0.15974
chr4_166960490_166999182_+	hsa_circTLL1_009	hsa_circ_0125725	1353	TLL1	exon-exon	1.199	0.142322	0.678055	no significant	0.128835	0.0186919	0.0320061	0.0415659	0.153424	0.15974
chr9_33953282_33996331_-	hsa_circUBAP2_029	hsa_circ_0086720	879	UBAP2	exon-exon	1.19869	0.0503307	0.464535	no significant	0.0644173	0.112151	0.0960182	0.290961	0.19178	0.191688
chr7_5963017_5963593_+	hsa_circCCZ1_014	hsa_circ_0007177	287	CCZ1	exon-exon	1.18472	0.0522124	0.464535	no significant	0.0322086	0.149535	0.128024	0.374093	0.19178	0.223636
chr1_21076215_21100103_-	hsa_circHP1BP3_029	hsa_circ_0000023	791	HP1BP3	exon-exon	1.18245	0.0630481	0.492616	no significant	0.128835	0.0934594	0.16003	0.249395	0.0767119	0.543116
chr6_161455290_161471011_+	hsa_circMAP3K4_004	hsa_circ_0078617	1555	MAP3K4	exon-exon	1.17947	0.0724039	0.530359	no significant	0.0322086	0.0934594	0.0800151	0.207829	0.153424	0.15974
chr16_16235029_16236799_+	hsa_circABCC1_097	hsa_circ_0105083	1770	ABCC1	exon-exon	1.16624	0.110126	0.63468	no significant	0	0.112151	0.0960182	0.0415659	0.19178	0.287532
chr11_107916996_107925682_+	hsa_circCUL5_008	hsa_circ_0024169	646	CUL5	exon-exon	1.15561	0.053786	0.464535	no significant	0.161043	0.0934594	0.128024	0.415659	0.115068	0.31948
chr11_34093272_34098189_+	hsa_circCAPRIN1_012	hsa_circ_0005974	472	CAPRIN1	exon-exon	1.151	0.0605827	0.486322	no significant	0.128835	0.112151	0.0640121	0.249395	0.19178	0.223636
chr12_124071293_124074996_+	hsa_circTMED2_002	hsa_circ_0000458	301	TMED2	exon-exon	1.14985	0.0775412	0.550778	no significant	0.161043	0.0560757	0.0800151	0.124698	0.306848	0.191688
chr5_64466443_64492978_-	hsa_circADAMTS6_051	hsa_circ_0008667	669	ADAMTS6	exon-exon	1.14406	0.115267	0.637171	no significant	0.0322086	0.112151	0.0640121	0.0415659	0.153424	0.287532
chr5_78734832_78752841_-	hsa_circHOMER1_004	hsa_circ_0006916	522	HOMER1	exon-exon	1.11566	0.122446	0.652302	no significant	0	0.130843	0.0640121	0.207829	0.19178	0.095844
chr11_119155678_119156276_+	hsa_circCBL_023	hsa_circ_0095155	510	CBL	exon-exon	1.10887	0.117826	0.642287	no significant	0.0322086	0.0373838	0.128024	0.207829	0.153424	0.127792
chr10_95790439_95792009_+	hsa_circPLCE1_002	hsa_circ_0019223	1570	PLCE1	exon-exon	1.08795	0.130812	0.655176	no significant	0.193252	0.0186919	0.192036	0.290961	0.038356	0.511168
chr21_38480691_38519903_+	hsa_circTTC3_027	hsa_circ_0061668	1171	TTC3	exon-exon	1.08742	0.135834	0.667102	no significant	0.0644173	0.0186919	0.112021	0.166263	0.115068	0.15974
chr1_1735857_1749314_-	hsa_circGNB1_028	hsa_circ_0009353	373	GNB1	exon-exon	1.07951	0.0849152	0.57675	no significant	0.128835	0.0934594	0.0640121	0.166263	0.19178	0.223636
chr11_118656760_118657227_-	hsa_circDDX6_004	hsa_circ_0004293	467	DDX6	exon-exon	1.06965	0.0526498	0.464535	no significant	0.161043	0.130843	0.128024	0.207829	0.38356	0.287532
chr13_77779390_77818086_-	hsa_circMYCBP2_038	hsa_circ_0030509	1462	MYCBP2	exon-exon	1.06806	0.190904	0.719419	no significant	0.257669	0.0560757	0.0320061	0.49879	0.153424	0.031948
chr1_213290658_213303232_+	hsa_circRPS6KC1_019	hsa_circ_0005522	457	RPS6KC1	exon-exon	1.06431	0.179369	0.704384	no significant	0	0.0373838	0.128024	0.207829	0.153424	0.063896
chr8_131164981_131181313_-	hsa_circASAP1_065	hsa_circ_0001824	334	ASAP1	exon-exon	1.06118	0.0617721	0.490099	no significant	0.289878	0.168227	0.128024	0.0831317	0.498628	0.575064
chr12_1136913_1137738_+	hsa_circERC1_003	hsa_circ_0000373	825	ERC1	exon-exon	1.06099	0.0700572	0.521687	no significant	0.193252	0.149535	0.0640121	0.290961	0.268492	0.255584
chr10_30315031_30318795_-	hsa_circKIAA1462_001	hsa_circ_0018069	3764	KIAA1462	exon-exon	1.05314	0.148696	0.678462	no significant	0.161043	0.0560757	0.0960182	0.0415659	0.115068	0.447272
chr5_67522117_67522837_+	hsa_circPIK3R1_002	hsa_circ_0006411	720	PIK3R1	exon-exon	1.04981	0.127494	0.654374	no significant	0.0644173	0.112151	0.0640121	0.124698	0.306848	0.095844
chr9_137582757_137593179_+	hsa_circCOL5A1_003	hsa_circ_0007482	545	COL5A1	exon-exon	1.04048	0.0877198	0.583081	no significant	0.193252	0.186919	0.16003	0.0415659	0.306848	0.734804
chr3_174241202_174271547_+	hsa_circTCONS_00005440_002	hsa_circ_0122758	30345	not_annotated	intergenic-intergenic	1.03817	0.0888269	0.58486	no significant	0.161043	0.0934594	0.0960182	0.166263	0.345204	0.191688
chr20_32207322_32211102_+	hsa_circCBFA2T2_007	hsa_circ_0003426	272	CBFA2T2	exon-exon	1.03386	0.0754459	0.54247	no significant	0.161043	0.186919	0.0800151	0.207829	0.230136	0.415324
chr6_157357968_157406039_+	hsa_circARID1B_031	hsa_circ_0001658	48071	ARID1B	intergenic-exon	1.03362	0.228759	0.762441	no significant	0.128835	0.0747676	0	0.166263	0.19178	0.031948
chr3_130649259_130660543_+	hsa_circATP2C1_002	hsa_circ_0005797	525	ATP2C1	exon-exon	1.02702	0.213588	0.745107	no significant	0.0644173	0.112151	0.016003	0	0.19178	0.191688
chr3_141231004_141259451_+	hsa_circRASA2_011	hsa_circ_0067582	394	RASA2	exon-exon	1.0231	0.102966	0.612093	no significant	0.0644173	0.0747676	0.144027	0.207829	0.153424	0.255584
chr17_60087910_60140662_-	NA	NA		MED13	exon-exon	1.01783	0.111885	0.63468	no significant	0.128835	0.0373838	0.400076	0.748186	0.230136	0.255584
chr13_41515056_41518061_-	hsa_circELF1_003	hsa_circ_0030051	727	ELF1	exon-exon	1.00902	0.143138	0.678462	no significant	0	0.0934594	0.128024	0.249395	0.153424	0.127792
chr16_80718434_80719026_-	hsa_circCDYL2_001	hsa_circ_0004087	592	CDYL2	exon-exon	1.00777	0.146277	0.678462	no significant	0.0966259	0.168227	0.0320061	0.249395	0.268492	0.095844
chr20_50290691_50307358_-	hsa_circATP9A_034	hsa_circ_0004770	395	ATP9A	exon-exon	0.978586	0.227331	0.762441	no significant	0.0322086	0.0186919	0.16003	0.124698	0.038356	0.287532
chrX_139865917_139866044_+	NA	NA		not_annotated	intergenic-intergenic	0.976032	0.161219	0.689594	no significant	0.161043	0.0373838	0.0800151	0.0831317	0.268492	0.15974
chr9_86276691_86284242_-	hsa_circUBQLN1_030	hsa_circ_0007698	675	UBQLN1	exon-exon	0.972727	0.187395	0.719294	no significant	0	0.149535	0.0800151	0.0415659	0.268492	0.191688
chr5_78915434_78919312_+	hsa_circPAPD4_010	hsa_circ_0001504	502	PAPD4	exon-exon	0.968336	0.154203	0.678462	no significant	0.0322086	0.112151	0.0800151	0.166263	0.230136	0.095844
chr7_17929985_17937069_-	hsa_circSNX13_003	hsa_circ_0079524	428	SNX13	exon-exon	0.964933	0.185844	0.716479	no significant	0.0644173	0.0186919	0.128024	0.166263	0.115068	0.15974
chr1_43239233_43241150_+	hsa_circC1orf50_006	hsa_circ_0004752	490	C1orf50	exon-exon	0.962426	0.249511	0.779806	no significant	0.161043	0.0373838	0.016003	0.124698	0.038356	0.191688
chr3_100560841_100567719_-	hsa_circABI3BP_002	hsa_circ_0004933	4596	ABI3BP	intergenic-exon	0.96159	0.200412	0.736061	no significant	0.193252	0.0747676	0.0320061	0.0415659	0.153424	0.31948
chr10_24816864_24825822_+	NA	NA		KIAA1217	exon-exon	0.951043	0.292037	0.804684	no significant	0.161043	0.0186919	0.016003	0	0.153424	0.15974
chr17_44248220_44249598_-	hsa_circ_chr17_00054	hsa_circ_0005455	1378	KANSL1	exon-exon	0.948322	0.124988	0.654374	no significant	0.161043	0.0934594	0.0960182	0.249395	0.115068	0.287532
chr5_72354259_72373320_+	hsa_circFCHO2_036	hsa_circ_0003571	594	FCHO2	exon-exon	0.947345	0.0912488	0.589605	no significant	0.161043	0.112151	0.176033	0.166263	0.421916	0.287532
chr18_9204473_9221997_+	hsa_circANKRD12_023	hsa_circ_0003865	708	ANKRD12	exon-exon	0.940758	0.120189	0.646151	no significant	0.0644173	0.0934594	0.16003	0.207829	0.230136	0.223636
chr4_146767107_146770713_-	hsa_circZNF827_018	hsa_circ_0003187	298	ZNF827	exon-exon	0.9329	0.175348	0.697601	no significant	0.193252	0.112151	0.0640121	0.0415659	0.19178	0.415324
chr21_40578033_40601362_-	hsa_circBRWD1_092	hsa_circ_0001192	1364	BRWD1	exon-exon	0.927031	0.063642	0.493963	no significant	0.161043	0.205611	0.176033	0.249395	0.38356	0.415324
chr12_14576842_14578407_+	hsa_circATF7IP_001	hsa_circ_0097977	1565	ATF7IP	exon-exon	0.924899	0.0915598	0.589605	no significant	0.0966259	0.130843	0.224042	0.332527	0.230136	0.351428
chr3_50102463_50103935_+	hsa_circRBM6_028	hsa_circ_0006531	357	RBM6	exon-exon	0.914699	0.0974196	0.602659	no significant	0.0966259	0.149535	0.176033	0.207829	0.345204	0.287532
chr3_51575513_51586079_+	hsa_circRAD54L2_001	hsa_circ_0001306	10566	RAD54L2	intergenic-intergenic	0.912401	0.0981316	0.602659	no significant	0.0966259	0.280378	0.480091	0.789752	0.767119	0.191688
chr3_169840378_169847340_-	hsa_circPHC3_041	hsa_circ_0067900	1023	PHC3	exon-exon	0.904686	0.0671517	0.50912	no significant	0.161043	0.186919	0.208039	0.457225	0.345204	0.287532
chr1_180953812_180962561_-	hsa_circSTX6_011	hsa_circ_0007905	391	STX6	exon-exon	0.904021	0.166332	0.696761	no significant	0.0644173	0.149535	0.128024	0.374093	0.268492	0.063896
chr5_76745584_76760634_-	hsa_circWDR41_010	hsa_circ_0008861	530	WDR41	exon-exon	0.898442	0.16671	0.696761	no significant	0.257669	0.112151	0.0800151	0.249395	0.0767119	0.447272
chr21_42598192_42629253_+	hsa_circBACE2_004	hsa_circ_0061774	991	BACE2	exon-exon	0.89714	0.0982148	0.602659	no significant	0.128835	0.205611	0.208039	0.581922	0.345204	0.15974
chr21_30698379_30702014_+	hsa_circBACH1_012	hsa_circ_0061395	1542	BACH1	exon-exon	0.895925	0.0964139	0.602659	no significant	0.22546	0.168227	0.128024	0.332527	0.19178	0.415324
chr13_113170753_113181798_-	hsa_circTUBGCP3_022	hsa_circ_0000504	751	TUBGCP3	exon-exon	0.894266	0.150447	0.678462	no significant	0.0322086	0.149535	0.176033	0.332527	0.115068	0.287532
chr5_64747301_64748745_-	hsa_circADAMTS6_018	hsa_circ_0008674	442	ADAMTS6	exon-exon	0.88965	0.225879	0.762441	no significant	0.0966259	0.112151	0.0320061	0.0415659	0.230136	0.15974
chr12_69983264_69985939_+	hsa_circCCT2_007	hsa_circ_0000418	304	CCT2	exon-exon	0.885066	0.169926	0.697601	no significant	0.193252	0.149535	0.0800151	0.374093	0.345204	0.063896
chr4_77055327_77065626_-	hsa_circNUP54_005	hsa_circ_0070039	643	NUP54	exon-exon	0.882019	0.084857	0.57675	no significant	0.418712	0.149535	0.224042	0.249395	0.460272	0.670908
chr6_42559888_42562042_+	hsa_circUBR2_010	hsa_circ_0001603	193	UBR2	exon-exon	0.878014	0.229287	0.762441	no significant	0.161043	0	0.128024	0.166263	0.153424	0.191688
chr15_49528047_49531564_+	hsa_circGALK2_008	hsa_circ_0008488	238	GALK2	exon-exon	0.876712	0.176104	0.697601	no significant	0.22546	0.242995	0.0640121	0.540356	0.38356	0.063896
chr10_93754291_93768032_+	hsa_circBTAF1_043	hsa_circ_0008148	614	BTAF1	exon-exon	0.873921	0.28199	0.80243	no significant	0.128835	0.0560757	0.016003	0.0415659	0.153424	0.127792
chr17_19861326_19861884_-	hsa_circAKAP10_008	hsa_circ_0004719	558	AKAP10	exon-exon	0.86865	0.147401	0.678462	no significant	0.161043	0.0934594	0.128024	0.124698	0.268492	0.287532
chr5_41794104_41807540_-	hsa_circOXCT1_008	hsa_circ_0004873	516	OXCT1	exon-exon	0.85987	0.258733	0.793809	no significant	0.128835	0.0373838	0.0800151	0	0.19178	0.223636
chr3_179131199_179137293_-	hsa_circGNB4_008	hsa_circ_0001364	603	GNB4	exon-exon	0.857394	0.129479	0.655176	no significant	0.418712	0.0934594	0.128024	0.290961	0.460272	0.31948
chr7_102962378_102963241_-	hsa_circDNAJC2_002	hsa_circ_0081751	364	DNAJC2	exon-exon	0.857064	0.213233	0.745107	no significant	0.193252	0.0747676	0.0480091	0.207829	0.230136	0.095844
chr16_66764014_66766408_-	hsa_circDYNC1LI2_014	hsa_circ_0000706	279	DYNC1LI2	exon-intergenic	0.856632	0.197866	0.731541	no significant	0.0322086	0.0934594	0.128024	0.0831317	0.230136	0.191688
chr2_96517441_96525822_-	hsa_circANKRD36C_001	hsa_circ_0121216	1631	not_annotated	intergenic-intergenic	0.854538	0.275371	0.800719	no significant	0.161043	0.0186919	0.0640121	0.0415659	0.230136	0.127792
chr3_43341245_43345284_+	hsa_circSNRK_003	hsa_circ_0004089	757	SNRK	exon-exon	0.851577	0.144541	0.678462	no significant	0.22546	0.130843	0.272051	0.789752	0.268492	0.127792
chr11_70200406_70202360_+	hsa_circPPFIA1_025	hsa_circ_0000337	419	PPFIA1	exon-exon	0.851154	0.175804	0.697601	no significant	0.22546	0.0560757	0.112021	0.290961	0.19178	0.191688
chr7_100410368_100410830_-	hsa_circEPHB4_014	hsa_circ_0001730	362	EPHB4	exon-exon	0.850282	0.0855054	0.57675	no significant	0.161043	0.186919	0.208039	0.374093	0.38356	0.287532
chr11_85733409_85742653_-	hsa_circPICALM_014	hsa_circ_0023942	322	PICALM	exon-exon	0.846422	0.109773	0.63468	no significant	0.450921	0.168227	0.272051	0.789752	0.613695	0.191688
chr6_34574331_34614575_-	hsa_circC6orf106_008	hsa_circ_0009095	548	C6orf106	exon-exon	0.839809	0.226316	0.762441	no significant	0.0322086	0.0934594	0.0800151	0.166263	0.115068	0.127792
chr17_45438743_45456619_+	hsa_circC17orf57_010	hsa_circ_0106983	921	EFCAB13	exon-exon	0.838977	0.310563	0.811882	no significant	0.0644173	0.112151	0.0320061	0.166263	0.230136	0
chr5_94224583_94248681_-	hsa_circMCTP1_027	hsa_circ_0001512	583	MCTP1	exon-exon	0.821045	0.264378	0.797732	no significant	0.128835	0.0560757	0.0800151	0.290961	0.153424	0.031948
chr11_18312988_18313566_-	hsa_circHPS5_023	hsa_circ_0000279	578	HPS5	exon-exon	0.820017	0.240472	0.7764	no significant	0.0644173	0.0560757	0.112021	0.124698	0.0767119	0.223636
chr2_165548730_165561615_-	hsa_circCOBLL1_006	hsa_circ_0056891	2418	COBLL1	exon-exon	0.818045	0.285893	0.804684	no significant	0.128835	0.0747676	0.0640121	0.249395	0.230136	0
chr20_13539654_13568017_-	hsa_circTASP1_022	hsa_circ_0004580	393	TASP1	exon-exon	0.817086	0.227453	0.762441	no significant	0.128835	0.0560757	0.112021	0.124698	0.306848	0.095844
chr3_119219541_119222868_+	hsa_circTIMMDC1_004	hsa_circ_0001329	323	TIMMDC1	exon-exon	0.81519	0.1519	0.678462	no significant	0.0644173	0.224303	0.176033	0.166263	0.421916	0.287532
chr10_103432671_103436193_-	hsa_circFBXW4_007	hsa_circ_0000255	415	FBXW4	exon-exon	0.814208	0.216578	0.745431	no significant	0.0644173	0.130843	0.0640121	0.124698	0.153424	0.191688
chr12_105321750_105322472_-	hsa_circSLC41A2_008	hsa_circ_0006260	722	SLC41A2	exon-exon	0.810346	0.184545	0.716479	no significant	0.128835	0.0934594	0.176033	0.124698	0.19178	0.383376
chr15_77544708_77576372_-	hsa_circPEAK1_008	hsa_circ_0104613	31664	PEAK1	exon-intergenic	0.809307	0.217722	0.746111	no significant	0.0966259	0.0747676	0.144027	0.0831317	0.153424	0.31948
chr5_167915606_167924353_+	hsa_circRARS_006	hsa_circ_0001551	777	RARS	exon-exon	0.803009	0.117026	0.640906	no significant	0.128835	0.39253	0.384073	0.207829	0.805475	0.63896
chr8_61484604_61504528_+	hsa_circRAB2A_005	hsa_circ_0007581	356	RAB2A	exon-exon	0.801633	0.210721	0.745107	no significant	0.0322086	0.0934594	0.176033	0.166263	0.230136	0.191688
chr1_33413822_33415375_-	hsa_circRNF19B_003	hsa_circ_0000048	351	RNF19B	exon-exon	0.798884	0.0861643	0.577055	no significant	0.48313	0.261686	0.496094	0.374093	0.843831	0.926492
chr3_170077486_170109048_+	hsa_circSKIL_005	hsa_circ_0122687	2529	SKIL	exon-exon	0.796932	0.233304	0.768067	no significant	0.193252	0.112151	0.0640121	0.0831317	0.153424	0.351428
chr1_14099572_14109326_+	hsa_circPRDM2_010	hsa_circ_0110664	4525	PRDM2	exon-exon	0.795627	0.270959	0.797732	no significant	0.0644173	0.0373838	0.16003	0.249395	0.19178	0.063896
chr1_26772806_26774151_+	hsa_circDHDDS_006	hsa_circ_0000034	219	DHDDS	exon-exon	0.79087	0.302913	0.804684	no significant	0.22546	0.0186919	0.0480091	0.166263	0.115068	0.15974
chr15_76152218_76165909_+	hsa_circUBE2Q2_009	hsa_circ_0104568	306	UBE2Q2	exon-exon	0.789388	0.0785142	0.55101	no significant	0.322086	0.317762	0.384073	0.415659	0.843831	0.543116
chr14_75513078_75516421_-	hsa_circMLH3_001	hsa_circ_0032649	3343	MLH3	exon-exon	0.787402	0.0993123	0.606219	no significant	0.257669	0.149535	0.272051	0.415659	0.38356	0.383376
chr6_56989531_57006893_+	hsa_circZNF451_010	hsa_circ_0007587	818	ZNF451	exon-exon	0.77983	0.280668	0.80243	no significant	0.0966259	0.112151	0.0640121	0	0.268492	0.191688
chr18_42281139_42281797_+	hsa_circSETBP1_003	hsa_circ_0006491	658	SETBP1	exon-exon	0.776123	0.115576	0.637171	no significant	0.354295	0.149535	0.576109	0.789752	0.536983	0.575064
chr4_56277780_56284152_+	hsa_circTMEM165_005	hsa_circ_0001414	585	TMEM165	exon-exon	0.775898	0.05617	0.466184	no significant	0.676381	1.02805	0.768145	1.08071	1.61095	1.5974
chr10_75830427_75834661_+	hsa_circVCL_002	hsa_circ_0018881	544	VCL	exon-exon	0.768169	0.334336	0.828181	no significant	0	0.0373838	0.144027	0.124698	0.0767119	0.15974
chr19_41754418_41754725_+	hsa_circAXL_035	hsa_circ_0002882	174	AXL	exon-exon	0.763604	0.300339	0.804684	no significant	0.128835	0.0373838	0.0640121	0.124698	0.0767119	0.15974
chr9_138773478_138774924_-	hsa_circCAMSAP1_006	hsa_circ_0001900	425	CAMSAP1	exon-exon	0.763553	0.0782903	0.55101	no significant	0.579755	0.579449	0.496094	1.41324	0.805475	0.63896
chr19_11289020_11289396_-	hsa_circKANK2_001	hsa_circ_0008554	295	KANK2	exon-exon	0.762051	0.133284	0.661853	no significant	0.0966259	0.186919	0.336064	0.290961	0.421916	0.415324
chr6_qbl_hap6_1911677_1912150_+	hsa_circ_chr6_qbl_hap6_00006	hsa_circ_0078966	473	C6orf136	exon-exon	0.761365	0.168105	0.697601	no significant	0.128835	0.205611	0.144027	0.249395	0.19178	0.383376
chr5_64747301_64756165_-	hsa_circADAMTS6_017	hsa_circ_0009162	611	ADAMTS6	exon-exon	0.761246	0.282489	0.80243	no significant	0.128835	0.0934594	0.0480091	0.0415659	0.230136	0.15974
chr1_155490890_155491409_-	hsa_circASH1L_003	hsa_circ_0014592	519	ASH1L	exon-exon	0.755689	0.319187	0.81769	no significant	0	0.0560757	0.128024	0.124698	0.115068	0.127792
chr7_66456123_66459328_-	hsa_circSBDS_005	hsa_circ_0134539	496	SBDS	exon-exon	0.752904	0.290711	0.804684	no significant	0.128835	0.0560757	0.0960182	0.0415659	0.115068	0.287532
chr2_169018296_169038600_-	hsa_circSTK39_007	hsa_circ_0001079	420	STK39	exon-exon	0.749785	0.291485	0.804684	no significant	0.0322086	0.112151	0.0960182	0.249395	0.038356	0.15974
chr5_60768507_60768864_+	hsa_circZSWIM6_004	hsa_circ_0005399	357	ZSWIM6	exon-exon	0.740141	0.295931	0.804684	no significant	0.0322086	0.0747676	0.112021	0.207829	0.0767119	0.127792
chr16_47531309_47581459_+	hsa_circPHKB_016	hsa_circ_0004791	634	PHKB	exon-exon	0.729743	0.270503	0.797732	no significant	0.0644173	0.0747676	0.112021	0.207829	0.115068	0.127792
chr11_118425173_118430579_-	hsa_circIFT46_003	hsa_circ_0008157	671	IFT46	exon-exon	0.729547	0.328821	0.821702	no significant	0.0322086	0.0373838	0.128024	0.124698	0.115068	0.127792
chr19_18648410_18649246_-	hsa_circFKBP8_010	hsa_circ_0000914	394	FKBP8	exon-exon	0.729154	0.185157	0.716479	no significant	0.128835	0.112151	0.432082	0.374093	0.536983	0.287532
chr12_49491348_49491888_-	hsa_circLMBR1L_015	hsa_circ_0004602	336	LMBR1L	exon-exon	0.72532	0.276016	0.800719	no significant	0.0644173	0.186919	0.0800151	0.124698	0.115068	0.31948
chr8_68163533_68172161_-	hsa_circARFGEF1_030	hsa_circ_0001807	727	ARFGEF1	exon-exon	0.718883	0.270673	0.797732	no significant	0.0644173	0.0934594	0.0960182	0.124698	0.19178	0.127792
chr1_9991948_9994918_-	hsa_circLZIC_005	hsa_circ_0000014	277	LZIC	exon-exon	0.717037	0.224232	0.762441	no significant	0.161043	0.149535	0.128024	0.166263	0.153424	0.383376
chr9_99284787_99327765_-	hsa_circCDC14B_006	hsa_circ_0087641	1183	CDC14B	exon-exon	0.715813	0.271117	0.797732	no significant	0.0644173	0.0934594	0.0960182	0.166263	0.115068	0.15974
chr4_128995614_128999117_+	hsa_circLARP1B_003	hsa_circ_0001438	294	LARP1B	exon-exon	0.701692	0.169985	0.697601	no significant	0.354295	0.112151	0.288055	0.415659	0.268492	0.511168
chr3_119582265_119624699_-	hsa_circGSK3B_023	hsa_circ_0008797	420	GSK3B	exon-exon	0.700482	0.239587	0.7764	no significant	0.193252	0.205611	0.0800151	0.124698	0.306848	0.31948
chr16_53188358_53191453_+	hsa_circCHD9_006	hsa_circ_0000701	3095	CHD9	intergenic-exon	0.695169	0.282089	0.80243	no significant	0.161043	0.0934594	0.0960182	0.0831317	0.306848	0.15974
chr12_116668237_116675510_-	hsa_circMED13L_010	hsa_circ_0000442	7273	MED13L	intergenic-exon	0.692174	0.345402	0.838119	no significant	0.161043	0.112151	0.0640121	0.124698	0.38356	0.031948
chr11_120347369_120348235_+	hsa_circARHGEF12_076	hsa_circ_0002089	255	ARHGEF12	exon-exon	0.687793	0.373083	0.852346	no significant	0.22546	0.0934594	0.016003	0.166263	0.268492	0.063896
chr2_64778576_64780543_+	hsa_circAFTPH_001	hsa_circ_0001021	1967	AFTPH	exon-exon	0.680958	0.395119	0.862098	no significant	0.128835	0.130843	0.016003	0.0415659	0.0767119	0.287532
chr15_43242459_43258484_-	hsa_circUBR1_084	hsa_circ_0008546	651	UBR1	exon-exon	0.675064	0.319839	0.81769	no significant	0.128835	0.130843	0.0960182	0.332527	0.230136	0.031948
chr1_29068914_29070498_+	hsa_circYTHDF2_003	hsa_circ_0000039	1584	YTHDF2	exon-exon	0.67236	0.290519	0.804684	no significant	0.0966259	0.149535	0.0960182	0.290961	0.19178	0.095844
chr11_61133516_61135470_+	hsa_circTMEM138_005	hsa_circ_0002058	248	TMEM138	exon-exon	0.663545	0.142032	0.678055	no significant	0.257669	0.280378	0.288055	0.540356	0.421916	0.383376
chr3_197557640_197593090_+	hsa_circLRCH3_036	hsa_circ_0068738	986	LRCH3	exon-exon	0.658719	0.395741	0.862098	no significant	0.0644173	0.149535	0.016003	0.124698	0.115068	0.127792
chr16_22360599_22361170_-	hsa_circCDR2_002	hsa_circ_0004682	314	CDR2	exon-exon	0.655769	0.251597	0.784232	no significant	0.0966259	0.205611	0.176033	0.124698	0.268492	0.383376
chr9_88233897_88248289_-	hsa_circAGTPBP1_058	hsa_circ_0001868	1033	AGTPBP1	exon-exon	0.654411	0.270478	0.797732	no significant	0.128835	0.280378	0.176033	0.623488	0.268492	0.095844
chr20_34300940_34313077_-	hsa_circRBM39_021	hsa_circ_0008143	758	RBM39	exon-exon	0.653403	0.405626	0.862098	no significant	0.257669	0.0186919	0.0480091	0.166263	0.19178	0.095844
chr1_172520651_172526934_+	hsa_circC1orf9_001	hsa_circ_0000160	670	SUCO	exon-exon	0.648553	0.332549	0.82749	no significant	0.0322086	0.242995	0.144027	0.0831317	0.153424	0.447272
chr4_146744573_146770713_-	hsa_circZNF827_019	hsa_circ_0001447	402	ZNF827	exon-exon	0.648048	0.364133	0.844184	no significant	0.128835	0.149535	0.0640121	0	0.19178	0.31948
chr21_34804483_34805178_+	hsa_circIFNGR2_017	hsa_circ_0001185	318	IFNGR2	exon-exon	0.645954	0.262947	0.797732	no significant	0.354295	0.0560757	0.208039	0.290961	0.345204	0.287532
chr11_85707868_85714494_-	hsa_circPICALM_069	hsa_circ_0023919	451	PICALM	exon-exon	0.639927	0.144874	0.678462	no significant	0.322086	0.29907	0.400076	0.623488	0.460272	0.543116
chr1_155365249_155429689_-	hsa_circASH1L_013	hsa_circ_0014584	1119	ASH1L	exon-exon	0.639735	0.351862	0.842153	no significant	0.193252	0.0560757	0.0640121	0.166263	0.153424	0.127792
chr9_16727794_16738483_-	hsa_circBNC2_003	hsa_circ_0008732	327	BNC2	exon-exon	0.633584	0.15207	0.678462	no significant	0.386504	0.317762	0.496094	0.623488	0.460272	0.7987
chr5_109049220_109065214_+	hsa_circMAN2A1_005	hsa_circ_0001519	572	MAN2A1	exon-exon	0.629519	0.172735	0.697601	no significant	0.22546	0.242995	0.272051	0.374093	0.345204	0.447272
chr9_128099296_128099870_+	hsa_circGAPVD1_035	hsa_circ_0003270	449	GAPVD1	exon-exon	0.626824	0.194518	0.723881	no significant	0.289878	0.280378	0.512097	0.457225	0.345204	0.894544
chr5_109049220_109051965_+	hsa_circMAN2A1_004	hsa_circ_0008058	400	MAN2A1	exon-exon	0.626046	0.241671	0.776629	no significant	0.193252	0.112151	0.256048	0.332527	0.268492	0.287532
chr8_122640953_122641580_-	hsa_circHAS2_001	hsa_circ_0005015	627	HAS2	exon-exon	0.625412	0.409381	0.862098	no significant	0.0322086	0.0373838	0.144027	0.166263	0.0767119	0.127792
chr18_13681603_13682104_-	hsa_circFAM210A_004	hsa_circ_0003979	501	FAM210A	exon-exon	0.623432	0.291999	0.804684	no significant	0.257669	0.112151	0.128024	0.124698	0.345204	0.255584
chr8_17868745_17869336_+	hsa_circPCM1_052	hsa_circ_0083465	291	PCM1	exon-exon	0.623247	0.278475	0.80243	no significant	0.0966259	0.149535	0.208039	0.249395	0.345204	0.15974
chr4_110384056_110384800_+	hsa_circSEC24B_003	hsa_circ_0003875	744	SEC24B	exon-exon	0.623012	0.31899	0.81769	no significant	0.128835	0.0747676	0.128024	0.124698	0.19178	0.191688
chr5_142779220_142780417_-	hsa_circNR3C1_002	hsa_circ_0001543	1197	NR3C1	exon-exon	0.621297	0.441021	0.86579	no significant	0.128835	0	0.0960182	0.124698	0.0767119	0.127792
chr7_33185853_33217203_+	hsa_circBBS9_002	hsa_circ_0003162	453	BBS9	exon-exon	0.620841	0.192702	0.721556	no significant	0.257669	0.355146	0.224042	0.290961	0.38356	0.607012
chr7_17908029_17915413_-	hsa_circSNX13_023	hsa_circ_0005519	397	SNX13	exon-exon	0.619736	0.31125	0.811882	no significant	0.128835	0.280378	0.112021	0.207829	0.498628	0.127792
chr7_158566031_158591763_-	hsa_circESYT2_005	hsa_circ_0083220	473	ESYT2	exon-exon	0.61333	0.394256	0.862098	no significant	0.0966259	0.0373838	0.240045	0.0415659	0.19178	0.351428
chr8_131164981_131193126_-	hsa_circASAP1_058	hsa_circ_0008934	550	ASAP1	exon-exon	0.612683	0.165457	0.696761	no significant	0.901842	0.429913	0.800151	0.665054	1.22739	1.34182
chr1_31465236_31468067_-	hsa_circPUM1_021	hsa_circ_0000043	438	PUM1	exon-exon	0.604961	0.394699	0.862098	no significant	0	0.0934594	0.16003	0.207829	0.115068	0.127792
chr6_17665469_17669777_-	hsa_circNUP153_020	hsa_circ_0007268	363	NUP153	exon-exon	0.604496	0.407418	0.862098	no significant	0.0322086	0.0934594	0.144027	0.166263	0.268492	0.031948
chr3_155547476_155551830_-	hsa_circSLC33A1_007	hsa_circ_0001350	519	SLC33A1	exon-exon	0.598619	0.377808	0.852356	no significant	0.0644173	0.0747676	0.112021	0.166263	0.0767119	0.15974
chr18_42529845_42533305_+	hsa_circSETBP1_021	hsa_circ_0108457	3460	SETBP1	exon-exon	0.59599	0.19049	0.719419	no significant	0.450921	0.261686	0.352067	0.70662	0.38356	0.511168
chr11_73418464_73429763_-	hsa_circRAB6A_012	hsa_circ_0000339	312	RAB6A	exon-exon	0.59541	0.221879	0.758142	no significant	0.354295	0.261686	0.400076	0.748186	0.613695	0.223636
chr16_11114049_11220003_+	hsa_circCLEC16A_030	hsa_circ_0007846	1338	CLEC16A	exon-exon	0.592255	0.368601	0.847059	no significant	0.128835	0.0560757	0.112021	0.124698	0.19178	0.127792
chr2_71623270_71645769_+	hsa_circZNF638_027	hsa_circ_0055151	922	ZNF638	exon-exon	0.590546	0.281202	0.80243	no significant	0.22546	0.186919	0.16003	0.457225	0.153424	0.255584
chr15_80390757_80415142_+	hsa_circZFAND6_007	hsa_circ_0000642	544	ZFAND6	exon-exon	0.590196	0.367391	0.845939	no significant	0.0644173	0.205611	0.0960182	0.207829	0.0767119	0.287532
chr2_215632205_215646233_-	hsa_circBARD1_018	hsa_circ_0001098	1204	BARD1	exon-exon	0.588713	0.423935	0.862098	no significant	0.0966259	0.0186919	0.144027	0.0831317	0.153424	0.15974
chr2_191765289_191789319_+	hsa_circGLS_014	hsa_circ_0001085	643	GLS	exon-exon	0.588274	0.205858	0.744645	no significant	0.48313	0.261686	0.256048	0.415659	0.421916	0.607012
chr3_171969049_172028671_+	hsa_circFNDC3B_039	hsa_circ_0003692	746	FNDC3B	exon-exon	0.58774	0.280628	0.80243	no significant	0.354295	0.542065	0.432082	0.0831317	0.728763	1.18208
chr11_10011043_10024236_-	hsa_circSBF2_019	hsa_circ_0094701	776	SBF2	exon-exon	0.586723	0.462013	0.880488	no significant	0.128835	0.0934594	0.016003	0.166263	0.038356	0.127792
chr6_13579682_13601181_+	hsa_circSIRT5_006	hsa_circ_0075648	1051	SIRT5	exon-exon	0.584593	0.428438	0.862098	no significant	0.0644173	0.112151	0.128024	0.0415659	0.38356	0.063896
chr4_37633006_37640126_-	hsa_circRELL1_005	hsa_circ_0001400	434	RELL1	exon-exon	0.58428	0.26775	0.797732	no significant	0.418712	0.373838	0.208039	0.956015	0.268492	0.287532
chr15_32819013_32825569_-	NA	NA		WHAMMP1	exon-exon	0.581699	0.259809	0.79461	no significant	0.386504	0.785059	0.36807	0.207829	0.920543	1.18208
chr15_32814648_32825569_-	NA	NA		WHAMMP1	intergenic-exon	0.578693	0.355082	0.842153	no significant	0.450921	0.822443	0.0640121	0.249395	0.536983	1.18208
chr12_112371689_112381173_-	hsa_circTMEM116_015	hsa_circ_0004206	523	TMEM116	exon-exon	0.578114	0.423137	0.862098	no significant	0.0322086	0.130843	0.0640121	0.0831317	0.153424	0.127792
chr4_83793096_83796975_-	hsa_circSEC31A_034	hsa_circ_0003549	380	SEC31A	exon-exon	0.578071	0.366669	0.845939	no significant	0.128835	0.186919	0.144027	0.0831317	0.498628	0.127792
chr10_128768965_128798571_+	hsa_circDOCK1_009	hsa_circ_0002669	939	DOCK1	exon-exon	0.576923	0.171518	0.697601	no significant	0.48313	0.523373	0.416079	0.581922	0.882187	0.670908
chr15_64791491_64792365_+	hsa_circZNF609_001	hsa_circ_0000615	874	ZNF609	intergenic-exon	0.573004	0.179702	0.704384	no significant	1.32055	1.42058	1.74433	3.2837	2.33971	1.18208
chr6_87920168_87928449_+	hsa_circZNF292_002	hsa_circ_0004383	5822	ZNF292	intergenic-exon	0.570198	0.188901	0.719294	no significant	0.289878	0.542065	0.480091	0.70662	0.536983	0.766752
chr4_187627716_187630999_-	hsa_circFAT1_004	hsa_circ_0001461	3283	FAT1	exon-exon	0.569899	0.278589	0.80243	no significant	0.0966259	0.224303	0.256048	0.207829	0.38356	0.31948
chr4_121675707_121732604_-	hsa_circPRDM5_012	hsa_circ_0005654	758	PRDM5	exon-exon	0.568025	0.21425	0.745107	no significant	0.773007	0.39253	0.480091	0.457225	0.767119	1.15013
chr1_21097422_21100103_-	hsa_circHP1BP3_024	hsa_circ_0005782	304	HP1BP3	exon-exon	0.566624	0.314846	0.816371	no significant	0.0966259	0.186919	0.224042	0.249395	0.153424	0.383376
chr5_94244955_94259726_-	hsa_circMCTP1_019	hsa_circ_0008417	440	MCTP1	exon-exon	0.565209	0.382255	0.853928	no significant	0.289878	0.130843	0.192036	0.623488	0.268492	0.031948
chr2_214174782_214228869_+	hsa_circSPAG16_010	hsa_circ_0004664	553	SPAG16	exon-exon	0.560246	0.358216	0.842218	no significant	0.161043	0.0934594	0.144027	0.207829	0.115068	0.255584
chr2_223765391_223773868_+	hsa_circACSL3_008	hsa_circ_0004821	525	ACSL3	exon-exon	0.559393	0.410327	0.862098	no significant	0.161043	0.112151	0.0480091	0.166263	0.19178	0.095844
chr18_51797729_51810383_+	hsa_circPOLI_006	hsa_circ_0047720	952	POLI	exon-exon	0.556472	0.452504	0.876586	no significant	0	0.0560757	0.272051	0.124698	0.19178	0.223636
chr19_34922765_34929671_+	hsa_circUBA2_014	hsa_circ_0004956	359	UBA2	exon-exon	0.554799	0.448613	0.87193	no significant	0.128835	0.0373838	0.0960182	0.207829	0.115068	0.063896
chr20_47570092_47580435_+	hsa_circARFGEF2_017	hsa_circ_0003998	304	ARFGEF2	exon-exon	0.554206	0.470709	0.885619	no significant	0.22546	0.0747676	0.0320061	0.0415659	0.268492	0.127792
chr4_140037802_140060651_-	hsa_circELF2_006	hsa_circ_0007710	9004	ELF2	intergenic-intergenic	0.552663	0.30935	0.811882	no significant	0.193252	0.261686	0.16003	0.374093	0.115068	0.415324
chr10_17746429_17747740_+	hsa_circSTAM_016	hsa_circ_0008311	297	STAM	exon-exon	0.550019	0.321186	0.817698	no significant	0.161043	0.149535	0.240045	0.124698	0.306848	0.383376
chrY_15021270_15024974_+	hsa_circDDX3Y_002	hsa_circ_0008297	434	DDX3Y	exon-exon	0.549213	0.519685	0.908488	no significant	0.0322086	0	0.192036	0.124698	0.0767119	0.15974
chr8_18725183_18730243_-	hsa_circPSD3_004	hsa_circ_0136098	1504	PSD3	exon-exon	0.548621	0.324393	0.817698	no significant	0.0644173	0.39253	0.304058	0.124698	0.498628	0.543116
chr12_50821544_50835426_+	hsa_circLARP4_010	hsa_circ_0026228	786	LARP4	exon-exon	0.546017	0.436719	0.863536	no significant	0.161043	0.0373838	0.112021	0.124698	0.0767119	0.223636
chr7_129760588_129762042_+	hsa_circKLHDC10_012	hsa_circ_0002190	304	KLHDC10	exon-exon	0.544503	0.252388	0.784477	no significant	0.22546	0.261686	0.272051	0.415659	0.230136	0.47922
chrX_10031484_10066619_+	hsa_circWWC3_005	hsa_circ_0001910	825	WWC3	exon-exon	0.544446	0.420768	0.862098	no significant	0.161043	0.130843	0.0480091	0.0831317	0.153424	0.223636
chr1_243579003_243589860_+	hsa_circSDCCAG8_031	hsa_circ_0017241	369	SDCCAG8	exon-exon	0.544206	0.403426	0.862098	no significant	0.0322086	0.130843	0.176033	0.0831317	0.230136	0.223636
chr2_36623756_36669878_+	hsa_circCRIM1_021	hsa_circ_0002346	538	CRIM1	exon-exon	0.541057	0.371261	0.851504	no significant	0.0644173	0.186919	0.128024	0.207829	0.19178	0.191688
chr16_69404385_69406258_-	hsa_circTERF2_003	hsa_circ_0105829	234	TERF2	exon-exon	0.540074	0.294228	0.804684	no significant	0.22546	0.168227	0.240045	0.332527	0.421916	0.191688
chr18_60206913_60217693_+	hsa_circZCCHC2_002	hsa_circ_0000854	374	ZCCHC2	exon-exon	0.539375	0.367376	0.845939	no significant	0.0644173	0.261686	0.128024	0.290961	0.19178	0.223636
chr1_169947225_170001116_-	hsa_circKIFAP3_013	hsa_circ_0111121	1146	KIFAP3	exon-exon	0.53544	0.215604	0.745391	no significant	0.547547	0.485989	0.89617	1.24698	0.728763	0.894544
chr1_8601272_8674745_-	hsa_circRERE_019	hsa_circ_0008501	434	RERE	exon-exon	0.528645	0.425223	0.862098	no significant	0.193252	0.0747676	0.128024	0.0831317	0.345204	0.127792
chr11_13435076_13443385_-	hsa_circBTBD10_008	hsa_circ_0008967	707	BTBD10	exon-exon	0.528145	0.245385	0.779134	no significant	0.257669	0.29907	0.272051	0.457225	0.345204	0.415324
chr3_183368083_183369064_+	hsa_circKLHL24_009	hsa_circ_0001369	981	KLHL24	exon-exon	0.527919	0.487095	0.90243	no significant	0	0.149535	0.0960182	0.124698	0.038356	0.223636
chrX_47705503_47755339_+	hsa_circZNF81_002	hsa_circ_0006364	440	ZNF81	exon-exon	0.526722	0.470765	0.885619	no significant	0.128835	0.0560757	0.128024	0.332527	0.038356	0.095844
chr8_71126137_71128999_-	hsa_circNCOA2_006	hsa_circ_0137069	278	NCOA2	exon-exon	0.525575	0.435269	0.863536	no significant	0.257669	0.112151	0.128024	0.457225	0.230136	0.031948
chr22_50810448_50832564_+	hsa_circPPP6R2_006	hsa_circ_0001258	374	PPP6R2	exon-exon	0.51929	0.424256	0.862098	no significant	0.0644173	0.168227	0.112021	0.290961	0.153424	0.095844
chr6_16326624_16328701_-	hsa_circATXN1_029	hsa_circ_0007132	2077	ATXN1	exon-exon	0.515947	0.26035	0.79461	no significant	0.515338	0.355146	0.448085	0.290961	0.805475	0.766752
chr8_17446976_17447274_+	hsa_circPDGFRL_001	hsa_circ_0003134	298	PDGFRL	exon-exon	0.511441	0.405533	0.862098	no significant	0.0644173	0.168227	0.128024	0.166263	0.153424	0.223636
chr16_74493579_74497377_-	hsa_circGLG1_025	hsa_circ_0003315	477	GLG1	exon-exon	0.511227	0.431419	0.862098	no significant	0.161043	0.149535	0.0960182	0.0831317	0.115068	0.351428
chr10_102683731_102685776_+	hsa_circFAM178A_011	hsa_circ_0006654	1069	FAM178A	exon-exon	0.504916	0.404205	0.862098	no significant	0.193252	0.149535	0.144027	0.207829	0.0767119	0.383376
chr12_56956200_56965639_+	hsa_circRBMS2_008	hsa_circ_0002588	476	RBMS2	exon-exon	0.50225	0.423392	0.862098	no significant	0.0644173	0.168227	0.112021	0.207829	0.19178	0.127792
chr5_138699447_138700432_+	hsa_circPAIP2_001	hsa_circ_0001538	344	PAIP2	exon-exon	0.498048	0.3027	0.804684	no significant	0.257669	0.261686	0.288055	0.332527	0.230136	0.575064
chr18_54423813_54426184_+	hsa_circWDR7_017	hsa_circ_0000852	859	WDR7	exon-exon	0.496936	0.372493	0.852346	no significant	0.0966259	0.261686	0.192036	0.415659	0.230136	0.191688
chr22_41521867_41536261_+	hsa_circEP300_013	hsa_circ_0116612	1149	EP300	exon-exon	0.494243	0.498074	0.90243	no significant	0.161043	0.0934594	0.0320061	0.124698	0.153424	0.095844
chr20_30954186_30956926_+	hsa_circASXL1_003	hsa_circ_0001136	195	ASXL1	exon-exon	0.493084	0.425354	0.862098	no significant	0.48313	0.112151	0.0960182	0.290961	0.421916	0.191688
chr6_13632601_13659064_-	hsa_circRANBP9_014	hsa_circ_0075650	1264	RANBP9	exon-exon	0.490369	0.454798	0.876631	no significant	0.193252	0.0747676	0.0960182	0.249395	0.115068	0.127792
chr7_6854394_6862991_-	hsa_circCCZ1B_004	hsa_circ_0003943	390	CCZ1B	exon-exon	0.487777	0.536115	0.909254	no significant	0.0644173	0.130843	0.176033	0.0415659	0	0.47922
chr15_63988322_64008672_-	hsa_circHERC1_110	hsa_circ_0035796	1143	HERC1	exon-exon	0.487404	0.430357	0.862098	no significant	0.0966259	0.186919	0.0960182	0.166263	0.153424	0.223636
chr1_48821341_48825442_-	hsa_circSPATA6_011	hsa_circ_0008202	285	SPATA6	exon-exon	0.483564	0.516879	0.908488	no significant	0.193252	0.0560757	0.0480091	0.166263	0.153424	0.063896
chr11_32948702_32956981_+	hsa_circQSER1_002	hsa_circ_0021570	3968	QSER1	exon-exon	0.483036	0.375052	0.852356	no significant	0.322086	0.130843	0.36807	0.249395	0.690407	0.223636
chr17_47388673_47390207_-	hsa_circZNF652_011	hsa_circ_0000782	409	ZNF652	exon-exon	0.480622	0.427758	0.862098	no significant	0.128835	0.0747676	0.272051	0.207829	0.230136	0.255584
chr3_197557640_197566268_+	hsa_circLRCH3_031	hsa_circ_0006040	441	LRCH3	exon-exon	0.479862	0.533288	0.908488	no significant	0.161043	0.130843	0.0480091	0.374093	0.038356	0.063896
chr2_208841374_208842310_-	hsa_circPLEKHM3_002	hsa_circ_0001095	936	PLEKHM3	exon-exon	0.479239	0.312301	0.811882	no significant	0.611964	0.205611	0.352067	0.457225	0.575339	0.543116
chr14_32559707_32563592_+	hsa_circARHGAP5_003	hsa_circ_0031583	3885	ARHGAP5	exon-exon	0.478021	0.270422	0.797732	no significant	0.386504	0.841135	0.496094	0.70662	0.920543	0.830648
chr4_10099334_10105610_-	hsa_circWDR1_009	hsa_circ_0003550	420	WDR1	exon-exon	0.477318	0.434083	0.863536	no significant	0.128835	0.112151	0.208039	0.124698	0.153424	0.351428
chr9_88920106_88924932_-	hsa_circZCCHC6_014	hsa_circ_0001869	508	ZCCHC6	exon-exon	0.476506	0.352825	0.842153	no significant	0.386504	0.149535	0.224042	0.207829	0.345204	0.447272
chr12_50821544_50824353_+	hsa_circLARP4_007	hsa_circ_0003664	380	LARP4	exon-exon	0.474997	0.566658	0.91442	no significant	0.161043	0.0747676	0.0320061	0.207829	0.153424	0
chr9_33960823_33989124_-	hsa_circUBAP2_034	hsa_circ_0138668	510	UBAP2	exon-exon	0.473834	0.434762	0.863536	no significant	0.193252	0.168227	0.0960182	0.207829	0.115068	0.287532
chr1_16891301_16893846_-	NA	NA		NBPF1	exon-exon	0.473551	0.243334	0.776629	no significant	1.03068	0.747676	0.640121	0.956015	1.18903	1.18208
chr3_67546221_67559327_-	hsa_circSUCLG2_013	hsa_circ_0004276	402	SUCLG2	exon-exon	0.472419	0.39199	0.862098	no significant	0.193252	0.336454	0.16003	0.0831317	0.421916	0.447272
chr6_4891946_4892613_+	hsa_circCDYL_005	hsa_circ_0008285	667	CDYL	exon-exon	0.469103	0.246922	0.779134	no significant	1.61043	0.841135	1.0722	1.49637	1.72602	1.62935
chr1_215759837_215768813_+	hsa_circKCTD3_008	hsa_circ_0005521	307	KCTD3	exon-exon	0.467247	0.583667	0.927601	no significant	0.0966259	0.149535	0	0.166263	0.038356	0.127792
chr3_71090478_71102924_-	hsa_circFOXP1_018	hsa_circ_0008234	587	FOXP1	exon-exon	0.465473	0.359475	0.842218	no significant	0.193252	0.355146	0.16003	0.290961	0.421916	0.287532
chr14_103470264_103478525_-	hsa_circCDC42BPB_002	hsa_circ_0000571	272	CDC42BPB	exon-exon	0.465039	0.49587	0.90243	no significant	0.0644173	0.0747676	0.112021	0.124698	0.115068	0.127792
chr7_66458203_66459328_-	hsa_circSBDS_004	hsa_circ_0003203	331	SBDS	exon-exon	0.464442	0.431785	0.862098	no significant	0.193252	0.242995	0.112021	0.124698	0.19178	0.415324
chr3_3178943_3186394_+	hsa_circTRNT1_003	hsa_circ_0123486	460	TRNT1	exon-exon	0.462562	0.426774	0.862098	no significant	0.322086	0.130843	0.144027	0.415659	0.153424	0.223636
chr6_146185523_146216113_-	hsa_circSHPRH_022	hsa_circ_0130934	22840	SHPRH	intergenic-exon	0.453132	0.494796	0.90243	no significant	0.0966259	0.0934594	0.144027	0.207829	0.038356	0.223636
chr5_54941616_54960691_-	hsa_circSLC38A9_019	hsa_circ_0008731	641	SLC38A9	exon-exon	0.452941	0.55554	0.910982	no significant	0.0322086	0.0560757	0.16003	0.166263	0.19178	0.031948
chr15_90984737_90986710_+	hsa_circIQGAP1_023	hsa_circ_0000652	264	IQGAP1	exon-exon	0.451096	0.380011	0.852356	no significant	0.257669	0.224303	0.272051	0.249395	0.613695	0.191688
chr10_70152894_70154208_-	hsa_circRUFY2_020	hsa_circ_0000239	252	RUFY2	exon-exon	0.445225	0.503557	0.905167	no significant	0.128835	0.0934594	0.0800151	0.0831317	0.115068	0.191688
chr1_28800065_28802803_+	hsa_circPHACTR4_011	hsa_circ_0000038	783	PHACTR4	exon-exon	0.444832	0.511387	0.908488	no significant	0.0966259	0.205611	0.128024	0.457225	0.0767119	0.095844
chr11_120346048_120348235_+	hsa_circARHGEF12_074	hsa_circ_0002955	423	ARHGEF12	exon-exon	0.443441	0.527581	0.908488	no significant	0.128835	0.0934594	0.16003	0.0831317	0.038356	0.383376
chr5_83356118_83362425_-	hsa_circEDIL3_004	hsa_circ_0073244	486	EDIL3	exon-exon	0.442808	0.406273	0.862098	no significant	0.161043	0.485989	0.576109	0.166263	0.613695	0.926492
chr17_65941524_65972074_+	hsa_circBPTF_069	hsa_circ_0000799	2026	BPTF	exon-exon	0.437205	0.302449	0.804684	no significant	1.03068	0.654216	0.84816	1.41324	1.34246	0.702856
chr10_16794537_16824083_-	hsa_circRSU1_002	hsa_circ_0006577	489	RSU1	exon-exon	0.434109	0.560708	0.912207	no significant	0.0966259	0.149535	0.0320061	0.124698	0.19178	0.063896
chr12_46319924_46322642_-	hsa_circSCAF11_014	hsa_circ_0025967	2718	SCAF11	exon-exon	0.431311	0.37935	0.852356	no significant	0.193252	0.261686	0.256048	0.374093	0.19178	0.415324
chr3_155551256_155560408_-	hsa_circSLC33A1_003	hsa_circ_0067774	491	SLC33A1	exon-exon	0.430797	0.515938	0.908488	no significant	0.128835	0.0747676	0.128024	0.207829	0.19178	0.063896
chr18_45391429_45423180_-	hsa_circSMAD2_005	hsa_circ_0000847	783	SMAD2	exon-exon	0.429911	0.453435	0.876631	no significant	0.128835	0.205611	0.144027	0.166263	0.306848	0.191688
chr12_66597490_66622150_+	hsa_circIRAK3_005	hsa_circ_0005505	754	IRAK3	exon-exon	0.428384	0.497955	0.90243	no significant	0.128835	0.205611	0.128024	0.415659	0.0767119	0.15974
chr2_171884848_171902872_-	hsa_circTLK1_021	hsa_circ_0004442	256	TLK1	exon-exon	0.42762	0.492583	0.90243	no significant	0.161043	0.0934594	0.112021	0.166263	0.19178	0.127792
chr4_2659529_2692697_+	hsa_circFAM193A_017	hsa_circ_0068926	1492	FAM193A	exon-exon	0.426873	0.597775	0.932132	no significant	0	0.205611	0.0480091	0.124698	0.19178	0.063896
chr7_141336759_141349133_+	hsa_circAGK_016	hsa_circ_0002980	378	AGK	exon-exon	0.425555	0.490688	0.90243	no significant	0.0644173	0.130843	0.16003	0.166263	0.153424	0.191688
chr16_48381417_48382201_+	hsa_circLONP2_033	hsa_circ_0005813	399	LONP2	exon-exon	0.424218	0.498955	0.90243	no significant	0.0966259	0.112151	0.112021	0.166263	0.153424	0.127792
chr4_174305801_174325101_+	hsa_circSCRG1_002	hsa_circ_0125797	19300	not_annotated	intergenic-intergenic	0.420598	0.630306	0.946536	no significant	0.0322086	0	0.240045	0.166263	0.038356	0.191688
chr7_91924202_91957214_+	hsa_circANKIB1_005	hsa_circ_0135062	877	ANKIB1	exon-exon	0.415772	0.32488	0.817698	no significant	0.450921	0.467297	0.720136	0.748186	0.690407	0.7987
chr8_101299728_101300495_-	hsa_circRNF19A_002	hsa_circ_0085128	767	RNF19A	exon-exon	0.415267	0.52016	0.908488	no significant	0.22546	0.0560757	0.128024	0.166263	0.19178	0.15974
chr20_62407030_62422143_-	hsa_circZBTB46_002	hsa_circ_0002805	1255	ZBTB46	exon-exon	0.415247	0.439976	0.865188	no significant	0.322086	0.186919	0.240045	0.581922	0.306848	0.127792
chr8_103372298_103373854_-	hsa_circUBR5_005	hsa_circ_0001819	324	UBR5	exon-exon	0.414395	0.417419	0.862098	no significant	0.257669	0.39253	0.224042	0.166263	0.345204	0.63896
chr18_2890558_2892484_+	hsa_circEMILIN2_003	hsa_circ_0004658	1926	EMILIN2	exon-exon	0.4136	0.489054	0.90243	no significant	0.22546	0.0934594	0.432082	0.623488	0.306848	0.127792
chr6_57058639_57075243_-	hsa_circRAB23_002	hsa_circ_0004119	639	RAB23	exon-exon	0.412665	0.444104	0.868116	no significant	0.289878	0.317762	0.496094	0.124698	0.38356	0.95844
chr1_92798947_92846430_+	hsa_circRPAP2_013	hsa_circ_0000091	383	RPAP2	exon-exon	0.408185	0.384236	0.854505	no significant	0.579755	0.205611	0.496094	0.49879	0.536983	0.63896
chr17_46109521_46111310_-	hsa_circCOPZ2_005	hsa_circ_0007293	308	COPZ2	exon-exon	0.406177	0.522368	0.908488	no significant	0.257669	0.186919	0.128024	0.124698	0.0767119	0.511168
chr17_57808781_57816308_+	hsa_circVMP1_006	hsa_circ_0006508	440	VMP1	exon-exon	0.404814	0.347281	0.840936	no significant	0.48313	0.373838	0.480091	0.748186	0.498628	0.543116
chr4_38091552_38104778_+	hsa_circTBC1D1_022	hsa_circ_0001402	507	TBC1D1	exon-exon	0.401429	0.425135	0.862098	no significant	0.193252	0.336454	0.176033	0.290961	0.268492	0.383376
chr9_79115831_79131692_+	hsa_circGCNT1_001	hsa_circ_0003654	14684	GCNT1	exon-intergenic	0.399109	0.598091	0.932132	no significant	0.0322086	0.0747676	0.192036	0	0.230136	0.191688
chr8_120800577_120810086_-	hsa_circTAF2_029	hsa_circ_0135601	1001	TAF2	exon-exon	0.398201	0.529566	0.908488	no significant	0.22546	0.112151	0.0800151	0.166263	0.153424	0.191688
chr5_132262812_132270633_-	hsa_circAFF4_006	hsa_circ_0073904	927	AFF4	exon-exon	0.398108	0.520343	0.908488	no significant	0.161043	0.0934594	0.16003	0.0831317	0.230136	0.223636
chr10_31661946_31750166_+	hsa_circZEB1_017	hsa_circ_0000230	88220	ZEB1	intergenic-exon	0.396664	0.344817	0.838119	no significant	0.869633	0.579449	0.480091	0.872883	0.767119	0.862596
chr1_211952259_211966532_-	hsa_circLPGAT1_006	hsa_circ_0002274	616	LPGAT1	exon-exon	0.393754	0.605882	0.936496	no significant	0.289878	0.0560757	0.0480091	0.0415659	0.153424	0.255584
chr14_50616725_50616948_-	hsa_circSOS2_047	hsa_circ_0007695	223	SOS2	exon-exon	0.393251	0.45851	0.879499	no significant	0.450921	0.242995	0.112021	0.332527	0.345204	0.31948
chr2_9048750_9098771_-	hsa_circMBOAT2_015	hsa_circ_0000972	320	MBOAT2	exon-exon	0.39142	0.518674	0.908488	no significant	0.22546	0.0934594	0.176033	0.332527	0.19178	0.127792
chr1_247318867_247323115_-	hsa_circZNF124_009	hsa_circ_0002922	1840	ZNF124	intergenic-exon	0.389349	0.364468	0.844184	no significant	0.450921	0.373838	0.416079	0.623488	0.536983	0.47922
chr4_107092251_107133992_-	hsa_circTBCK_041	hsa_circ_0007540	461	TBCK	exon-exon	0.38512	0.555458	0.910982	no significant	0.0966259	0.0934594	0.112021	0.166263	0.0767119	0.15974
chr11_73418464_73429935_-	hsa_circRAB6A_007	hsa_circ_0004596	312	RAB6A	exon-exon	0.383016	0.564292	0.912207	no significant	0.193252	0.149535	0.0480091	0.166263	0.19178	0.127792
chr2_40655612_40657444_-	hsa_circSLC8A1_005	hsa_circ_0000994	1832	SLC8A1	exon-exon	0.377994	0.360634	0.842218	no significant	0.48313	0.635524	0.560106	0.872883	0.652051	0.702856
chr14_21971315_21972024_-	hsa_circMETTL3_004	hsa_circ_0000523	623	METTL3	exon-exon	0.377312	0.374141	0.852356	no significant	0.418712	0.59814	0.5281	0.789752	0.767119	0.511168
chr20_34302106_34313077_-	hsa_circRBM39_020	hsa_circ_0004870	680	RBM39	exon-exon	0.376979	0.417613	0.862098	no significant	0.354295	0.261686	0.288055	0.332527	0.306848	0.511168
chr18_44470542_44483598_-	hsa_circPIAS2_003	hsa_circ_0108510	13056	PIAS2	exon-intergenic	0.375629	0.466339	0.885619	no significant	0.0966259	0.242995	0.448085	0.332527	0.345204	0.415324
chr21_30693541_30702014_+	hsa_circBACH1_008	hsa_circ_0001181	1836	BACH1	exon-exon	0.373063	0.406787	0.862098	no significant	0.289878	0.317762	0.384073	0.332527	0.460272	0.511168
chr1_247319707_247323115_-	hsa_circZNF124_008	hsa_circ_0112879	1186	ZNF124	exon-exon	0.371603	0.364056	0.844184	no significant	0.901842	0.59814	0.624118	0.997581	0.805475	0.926492
chr9_17226200_17236586_+	hsa_circCNTLN_001	hsa_circ_0138339	400	CNTLN	exon-exon	0.36707	0.622049	0.943773	no significant	0.0644173	0.130843	0.112021	0.166263	0.268492	0
chr10_31661946_31791437_+	hsa_circZEB1_018	hsa_circ_0004126	88445	ZEB1	intergenic-exon	0.361483	0.609761	0.940316	no significant	0.0322086	0.0747676	0.176033	0.166263	0.0767119	0.15974
chr6_117019866_117026323_+	hsa_circKPNA5_014	hsa_circ_0001639	316	KPNA5	exon-exon	0.360476	0.568782	0.91442	no significant	0.193252	0.0747676	0.224042	0.374093	0.115068	0.15974
chr8_121160044_121180486_+	hsa_circCOL14A1_001	hsa_circ_0135618	473	COL14A1	exon-exon	0.35815	0.67153	0.960875	no significant	0.0322086	0.224303	0.016003	0.166263	0.038356	0.15974
chr20_34446223_34459751_+	hsa_circPHF20_027	hsa_circ_0003322	942	PHF20	exon-exon	0.357938	0.4968	0.90243	no significant	0.161043	0.205611	0.240045	0.166263	0.345204	0.287532
chr8_93017343_93029591_-	hsa_circRUNX1T1_014	hsa_circ_0007443	652	RUNX1T1	exon-exon	0.357011	0.423921	0.862098	no significant	0.289878	0.317762	0.352067	0.415659	0.460272	0.383376
chr1_29481207_29481422_-	hsa_circSRSF4_006	hsa_circ_0006602	215	SRSF4	exon-exon	0.356277	0.602946	0.935964	no significant	0.289878	0.149535	0.0320061	0.207829	0.19178	0.15974
chr1_219366423_219392054_+	hsa_circLYPLAL1_005	hsa_circ_0004314	7507	LYPLAL1	exon-intergenic	0.355314	0.526098	0.908488	no significant	0.257669	0.336454	0.272051	0.207829	0.805475	0.127792
chr15_85223943_85234875_-	hsa_circSEC11A_003	hsa_circ_0000647	380	SEC11A	exon-exon	0.355236	0.636009	0.949862	no significant	0.22546	0.112151	0.0480091	0	0.153424	0.287532
chr13_96409897_96416207_+	hsa_circDNAJC3_005	hsa_circ_0101041	682	DNAJC3	exon-exon	0.354999	0.449767	0.872726	no significant	0.322086	0.29907	0.336064	0.415659	0.230136	0.575064
chr3_31617887_31621588_+	hsa_circSTT3B_002	hsa_circ_0001278	397	STT3B	exon-exon	0.354475	0.496995	0.90243	no significant	0.322086	0.205611	0.192036	0.332527	0.421916	0.15974
chr11_85722072_85742653_-	hsa_circPICALM_017	hsa_circ_0000347	635	PICALM	exon-exon	0.354142	0.427555	0.862098	no significant	0.322086	0.355146	0.320061	0.49879	0.345204	0.447272
chr7_6854394_6861995_-	hsa_circCCZ1B_008	hsa_circ_0008970	342	CCZ1B	exon-exon	0.350641	0.470768	0.885619	no significant	0.22546	0.373838	0.224042	0.290961	0.498628	0.287532
chr7_22999874_23030758_-	hsa_circFAM126A_006	hsa_circ_0008951	1019	FAM126A	exon-exon	0.349619	0.428517	0.862098	no significant	0.386504	0.504681	0.400076	0.49879	0.767119	0.415324
chrX_134679347_134686071_+	hsa_circDDX26B_007	hsa_circ_0139798	870	DDX26B	exon-exon	0.348021	0.581339	0.927306	no significant	0.161043	0.130843	0.0960182	0.249395	0.115068	0.127792
chrX_44383247_44386611_-	hsa_circFUNDC1_002	hsa_circ_0007290	403	FUNDC1	exon-exon	0.345725	0.594405	0.932132	no significant	0.193252	0.0747676	0.128024	0.249395	0.153424	0.095844
chr2_37543379_37544322_-	hsa_circPRKD3_001	hsa_circ_0000992	943	PRKD3	exon-intergenic	0.343293	0.448324	0.87193	no significant	0.837425	0.373838	0.976185	1.24698	0.728763	0.830648
chr7_158580694_158591763_-	hsa_circESYT2_004	hsa_circ_0001777	417	ESYT2	exon-exon	0.342729	0.483669	0.901208	no significant	0.289878	0.504681	0.736139	0.290961	1.07397	0.63896
chr2_61340904_61345251_+	hsa_circKIAA1841_039	hsa_circ_0001014	2493	KIAA1841	intergenic-exon	0.337879	0.564261	0.912207	no significant	0.128835	0.168227	0.16003	0.249395	0.230136	0.127792
chr7_127013395_127017383_-	hsa_circZNF800_005	hsa_circ_0082096	1837	ZNF800	exon-exon	0.337445	0.584291	0.927601	no significant	0.0966259	0.242995	0.128024	0.166263	0.115068	0.31948
chr5_153409048_153414527_-	hsa_circFAM114A2_005	hsa_circ_0007773	509	FAM114A2	exon-exon	0.333874	0.563491	0.912207	no significant	0.128835	0.29907	0.272051	0.0415659	0.306848	0.543116
chr15_50875285_50884823_-	hsa_circTRPM7_054	hsa_circ_0035228	949	TRPM7	exon-exon	0.332803	0.649783	0.950909	no significant	0.161043	0.186919	0.0320061	0.0831317	0.0767119	0.287532
chr11_95825055_95826681_-	hsa_circMAML2_003	hsa_circ_0024085	1626	MAML2	exon-exon	0.331283	0.474371	0.890479	no significant	0.257669	0.261686	0.288055	0.332527	0.38356	0.31948
chr9_96233422_96238620_+	hsa_circFAM120A_005	hsa_circ_0008193	330	FAM120A	exon-exon	0.329619	0.562135	0.912207	no significant	0.193252	0.280378	0.128024	0.166263	0.19178	0.383376
chr8_141745349_141762415_-	hsa_circPTK2_103	hsa_circ_0004238	698	PTK2	exon-exon	0.326044	0.659791	0.956604	no significant	0.0322086	0.0747676	0.16003	0.207829	0.038356	0.127792
chr5_64747301_64769779_-	hsa_circADAMTS6_004	hsa_circ_0072688	1352	ADAMTS6	exon-exon	0.323671	0.546658	0.910982	no significant	1.77147	2.41125	0.576109	0.581922	2.60821	2.74753
chr1_113196219_113202401_+	hsa_circCAPZA1_010	hsa_circ_0000109	430	CAPZA1	exon-exon	0.32359	0.530698	0.908488	no significant	0.289878	0.205611	0.256048	0.540356	0.230136	0.191688
chr18_9195548_9221997_+	hsa_circANKRD12_017	hsa_circ_0046843	856	ANKRD12	exon-exon	0.321848	0.49797	0.90243	no significant	0.322086	0.280378	0.208039	0.332527	0.38356	0.287532
chr6_158733082_158735300_+	hsa_circTCONS_00011401_005	hsa_circ_0131202	2218	TULP4	intergenic-exon	0.321644	0.427777	0.862098	no significant	0.644173	0.672908	0.784148	0.831317	1.07397	0.766752
chr18_12999419_13019205_+	hsa_circCEP192_006	hsa_circ_0000831	1054	CEP192	exon-exon	0.320769	0.4982	0.90243	no significant	0.22546	0.542065	0.68813	0.914449	0.421916	0.575064
chr16_85667519_85667738_+	hsa_circKIAA0182_001	hsa_circ_0000722	219	GSE1	exon-exon	0.320674	0.597319	0.932132	no significant	0.450921	0.130843	0.16003	0.49879	0.306848	0.095844
chr2_45773870_45789895_-	hsa_circSRBD1_014	hsa_circ_0000997	569	SRBD1	exon-exon	0.320604	0.622386	0.943773	no significant	0.0966259	0.0934594	0.208039	0.290961	0.153424	0.095844
chr12_42745686_42792796_+	hsa_circPPHLN1_007	hsa_circ_0004815	837	PPHLN1	exon-exon	0.320175	0.704408	0.973545	no significant	0	0.0373838	0.192036	0.124698	0.038356	0.15974
chr15_44907560_44912601_-	hsa_circSPG11_033	hsa_circ_0003784	418	SPG11	exon-exon	0.317307	0.630209	0.946536	no significant	0.0966259	0.186919	0.0960182	0.290961	0.115068	0.095844
chr6_149699153_149700654_+	hsa_circTAB2_006	hsa_circ_0078201	1501	TAB2	exon-exon	0.313644	0.649575	0.950909	no significant	0.161043	0.0934594	0.0800151	0.0415659	0.115068	0.223636
chr10_70404454_70406762_+	hsa_circTET1_005	hsa_circ_0093996	2308	TET1	exon-exon	0.312757	0.593342	0.932132	no significant	0.193252	0.242995	0.704133	0.332527	0.153424	0.95844
chr11_61205096_61205585_+	hsa_circSDHAF2_003	hsa_circ_0000311	334	SDHAF2	exon-exon	0.312748	0.613922	0.942968	no significant	0.0644173	0.186919	0.16003	0.166263	0.115068	0.255584
chr3_56661064_56662642_-	hsa_circFAM208A_052	hsa_circ_0001314	392	FAM208A	exon-exon	0.311864	0.600677	0.933679	no significant	0.22546	0.112151	0.320061	0.540356	0.153424	0.15974
chr4_128842678_128861152_-	hsa_circMFSD8_013	hsa_circ_0009133	797	MFSD8	exon-exon	0.311703	0.53331	0.908488	no significant	0.257669	0.186919	0.240045	0.290961	0.306848	0.255584
chr6_13639794_13644961_-	hsa_circRANBP9_023	hsa_circ_0001578	598	RANBP9	exon-exon	0.310554	0.525439	0.908488	no significant	0.161043	0.373838	0.544103	0.332527	0.421916	0.63896
chr5_82832825_82850857_+	hsa_circVCAN_011	hsa_circ_0073239	5732	VCAN	exon-exon	0.31036	0.551227	0.910982	no significant	0.193252	0.317762	0.224042	0.540356	0.19178	0.223636
chr5_36982266_36986403_+	hsa_circNIPBL_029	hsa_circ_0128921	4137	NIPBL	intergenic-exon	0.299327	0.536357	0.909254	no significant	0.515338	0.504681	0.272051	0.290961	0.421916	0.830648
chr4_121631463_121732604_-	hsa_circPRDM5_013	hsa_circ_0070814	863	PRDM5	exon-exon	0.294267	0.679174	0.960875	no significant	0.0322086	0.112151	0.128024	0.166263	0.038356	0.15974
chr1_21295966_21307720_-	hsa_circEIF4G3_054	hsa_circ_0000025	516	EIF4G3	exon-exon	0.291268	0.675798	0.960875	no significant	0.0644173	0.168227	0.240045	0.457225	0.153424	0.031948
chr5_137288316_137290065_-	hsa_circFAM13B_037	hsa_circ_0008177	423	FAM13B	exon-exon	0.289869	0.679663	0.960875	no significant	0.0322086	0.112151	0.16003	0.124698	0.230136	0.063896
chr15_30053341_30065560_-	hsa_circTJP1_008	hsa_circ_0034293	926	TJP1	exon-exon	0.289461	0.637858	0.949862	no significant	0.161043	0.149535	0.192036	0.332527	0.038356	0.255584
chr17_35310185_35311207_+	hsa_circAATF_003	hsa_circ_0004751	549	AATF	exon-exon	0.286462	0.638645	0.949862	no significant	0.22546	0.130843	0.176033	0.290961	0.306848	0.063896
chr15_85657103_85664245_+	hsa_circPDE8A_034	hsa_circ_0036629	767	PDE8A	exon-exon	0.286365	0.528164	0.908488	no significant	0.644173	0.317762	0.432082	0.457225	0.460272	0.734804
chr5_179688683_179707608_-	hsa_circMAPK9_004	hsa_circ_0001566	497	MAPK9	exon-exon	0.285357	0.670682	0.960875	no significant	0.0966259	0.130843	0.192036	0.124698	0.038356	0.351428
chr14_91947919_91957146_-	hsa_circSMEK1_001	hsa_circ_0032965	773	SMEK1	exon-exon	0.284056	0.720006	0.977849	no significant	0.161043	0.149535	0.016003	0.249395	0.0767119	0.063896
chr1_15860731_15863309_+	hsa_circDNAJC16_006	hsa_circ_0000018	407	DNAJC16	exon-exon	0.283991	0.689063	0.967164	no significant	0.128835	0.0934594	0.0640121	0.166263	0.115068	0.063896
chr5_56542126_56543042_+	hsa_circGPBP1_015	hsa_circ_0072546	326	GPBP1	exon-exon	0.283422	0.665148	0.95886	no significant	0.0966259	0.130843	0.0960182	0.124698	0.0767119	0.191688
chr3_133876964_133914026_-	hsa_circRYK_017	hsa_circ_0003113	1077	RYK	exon-exon	0.280634	0.687858	0.967164	no significant	0.0966259	0.0934594	0.112021	0.207829	0.153424	0.031948
chr3_56694758_56707753_-	hsa_circFAM208A_012	hsa_circ_0001315	1037	FAM208A	exon-exon	0.27839	0.641143	0.950591	no significant	0.257669	0.149535	0.224042	0.457225	0.268492	0.063896
chr13_20425494_20426330_-	hsa_circZMYM5_001	hsa_circ_0002673	596	ZMYM5	exon-exon	0.278205	0.714158	0.977849	no significant	0	0.149535	0.0960182	0.124698	0.153424	0.063896
chr3_196118683_196129890_-	hsa_circUBXN7_006	hsa_circ_0001380	247	UBXN7	exon-exon	0.275406	0.659461	0.956604	no significant	0.354295	0.0934594	0.112021	0.207829	0.19178	0.223636
chr2_173433468_173460751_+	hsa_circPDK1_023	hsa_circ_0057105	596	PDK1	exon-exon	0.274025	0.678062	0.960875	no significant	0.193252	0.0560757	0.176033	0.0831317	0.153424	0.255584
chr2_211018218_211019335_-	hsa_circC2orf67_002	hsa_circ_0008459	1117	KANSL1L	exon-exon	0.269839	0.574894	0.921718	no significant	0.193252	0.29907	0.496094	0.332527	0.536983	0.383376
chr17_45695715_45696530_+	hsa_circNPEPPS_042	hsa_circ_0004622	264	NPEPPS	exon-exon	0.264019	0.661503	0.956604	no significant	0.22546	0.149535	0.16003	0.374093	0.0767119	0.191688
chr18_42281139_42339068_+	hsa_circSETBP1_009	hsa_circ_0108447	57929	SETBP1	exon-intergenic	0.262274	0.703519	0.973465	no significant	0	0.149535	0.176033	0.124698	0.153424	0.15974
chr16_30740286_30740893_+	hsa_circSRCAP_039	hsa_circ_0006127	469	SRCAP	exon-exon	0.260317	0.604839	0.936496	no significant	0.161043	0.336454	0.416079	0.290961	0.613695	0.255584
chr9_113703700_113735838_-	hsa_circLPAR1_016	hsa_circ_0003611	974	LPAR1	exon-exon	0.257152	0.662511	0.956604	no significant	0.257669	0.224303	0.112021	0.0831317	0.306848	0.287532
chr9_114148656_114154104_-	hsa_circKIAA0368_054	hsa_circ_0001882	435	KIAA0368	exon-exon	0.250836	0.568261	0.91442	no significant	0.611964	0.710292	0.512097	0.581922	0.498628	1.08623
chr1_46105881_46108171_-	hsa_circGPBP1L1_017	hsa_circ_0008774	267	GPBP1L1	exon-exon	0.244465	0.707923	0.976047	no significant	0.128835	0.261686	0.144027	0.415659	0.230136	0.031948
chr17_20107645_20109225_+	hsa_circSPECC1_006	hsa_circ_0000745	1580	SPECC1	exon-exon	0.244178	0.541587	0.909525	no significant	2.83436	2.46733	1.84035	2.66022	3.8356	2.01272
chr15_43120125_43132631_-	hsa_circTTBK2_018	hsa_circ_0008319	320	TTBK2	exon-exon	0.24408	0.720913	0.977906	no significant	0.257669	0.0747676	0.0800151	0.166263	0.19178	0.095844
chrY_22669237_22683186_-	hsa_circTCONS_l2_00031050_001	hsa_circ_0140783	3135	TTTY10	exon-intergenic	0.243707	0.766336	0.984418	no significant	0.0644173	0	0.256048	0.166263	0.115068	0.127792
chr5_21491429_21497305_+	hsa_circGUSBP1_005	hsa_circ_0128780	448	GUSBP1	exon-exon	0.242218	0.649431	0.950909	no significant	0.547547	0.336454	0.224042	0.166263	0.306848	0.766752
chr4_83799882_83803093_-	hsa_circSEC31A_007	hsa_circ_0006618	406	SEC31A	exon-exon	0.240287	0.628681	0.946536	no significant	0.70859	0.261686	0.256048	0.374093	0.421916	0.575064
chr12_111990083_111993723_-	hsa_circATXN2_005	hsa_circ_0002457	320	ATXN2	exon-exon	0.239624	0.660607	0.956604	no significant	0.22546	0.205611	0.192036	0.332527	0.115068	0.287532
chr11_33307958_33309057_+	hsa_circHIPK3_004	hsa_circ_0000284	1099	HIPK3	exon-exon	0.232129	0.561806	0.912207	no significant	7.69786	6.16832	6.73727	12.0541	6.55887	5.81454
chr8_71071739_71075089_-	hsa_circNCOA2_013	hsa_circ_0001810	292	NCOA2	exon-exon	0.232081	0.74936	0.980865	no significant	0	0.130843	0.144027	0.124698	0.0767119	0.15974
chr10_51632845_51656468_+	hsa_circ_chr10_00041	hsa_circ_0004915	23623	not_annotated	intergenic-intergenic	0.231107	0.718184	0.977849	no significant	0.289878	0.186919	0.0640121	0.290961	0.19178	0.127792
chr5_56160560_56161804_+	hsa_circMAP3K1_011	hsa_circ_0001485	467	MAP3K1	exon-exon	0.229534	0.709274	0.976047	no significant	0.257669	0.205611	0.256048	0.665054	0.153424	0.063896
chr11_118451960_118455359_+	hsa_circARCN1_003	hsa_circ_0006374	815	ARCN1	exon-exon	0.228969	0.71247	0.977769	no significant	0.128835	0.242995	0.112021	0.0831317	0.19178	0.287532
chr3_169854206_169896726_-	hsa_circPHC3_008	hsa_circ_0002622	905	PHC3	exon-exon	0.228729	0.739208	0.980865	no significant	0.193252	0.112151	0.128024	0.0831317	0.038356	0.351428
chr2_26587169_26596497_+	hsa_circEPT1_005	hsa_circ_0005029	516	EPT1	exon-exon	0.228582	0.727877	0.979305	no significant	0.0644173	0.149535	0.112021	0.0831317	0.19178	0.127792
chr7_23224688_23226765_+	hsa_circNUPL2_002	hsa_circ_0001683	324	NUPL2	exon-exon	0.224556	0.748904	0.980865	no significant	0.0966259	0.168227	0.144027	0.249395	0.268492	0
chr18_9182379_9221997_+	hsa_circANKRD12_010	hsa_circ_0000826	994	ANKRD12	exon-exon	0.224332	0.587032	0.929733	no significant	1.83589	1.70096	0.944179	1.5795	1.45753	2.17246
chr4_95494501_95507595_+	hsa_circPDLIM5_006	hsa_circ_0070467	672	PDLIM5	exon-exon	0.221424	0.631562	0.946536	no significant	0.322086	0.280378	0.400076	0.415659	0.498628	0.287532
chr11_68318588_68331900_+	hsa_circPPP6R3_037	hsa_circ_0007660	423	PPP6R3	exon-exon	0.215402	0.732942	0.979305	no significant	0.0644173	0.168227	0.176033	0.124698	0.115068	0.255584
chr9_20819794_20823114_+	hsa_circKIAA1797_043	hsa_circ_0003295	465	FOCAD	exon-exon	0.214924	0.76001	0.984418	no significant	0.289878	0.130843	0.0320061	0.166263	0.153424	0.15974
chr6_108984657_108986092_+	hsa_circFOXO3_002	hsa_circ_0006404	1435	FOXO3	exon-exon	0.21171	0.743894	0.980865	no significant	0.0322086	0.168227	0.208039	0.249395	0.115068	0.15974
chr14_89628044_89629313_-	hsa_circFOXN3_009	hsa_circ_0000558	1269	FOXN3	exon-exon	0.211466	0.750234	0.980865	no significant	0.0966259	0.112151	0.128024	0.166263	0.038356	0.191688
chr1_52975267_52992045_-	hsa_circZCCHC11_009	hsa_circ_0113605	1092	ZCCHC11	exon-exon	0.209245	0.766871	0.984418	no significant	0.289878	0.0560757	0.0960182	0.124698	0.0767119	0.255584
chr18_9931806_9950565_+	hsa_circVAPA_007	hsa_circ_0046909	647	VAPA	exon-exon	0.206011	0.734478	0.979305	no significant	0.22546	0.112151	0.128024	0.166263	0.153424	0.191688
chr7_101870646_101870949_+	hsa_circCUX1_031	hsa_circ_0006501	303	CUX1	exon-exon	0.205495	0.729398	0.979305	no significant	0.161043	0.186919	0.128024	0.207829	0.115068	0.223636
chr6_158703294_158735300_+	hsa_circTCONS_00011401_003	hsa_circ_0131196	2334	TULP4	intergenic-exon	0.204795	0.687391	0.967164	no significant	0.48313	0.224303	0.240045	0.49879	0.38356	0.191688
chr14_102661274_102676199_+	hsa_circWDR20_007	hsa_circ_0002553	1443	WDR20	exon-exon	0.198978	0.742402	0.980865	no significant	0.257669	0.149535	0.16003	0.166263	0.38356	0.095844
chr4_151388824_151412187_-	hsa_circLRBA_123	hsa_circ_0006867	450	LRBA	exon-exon	0.196394	0.763173	0.984418	no significant	0.161043	0.261686	0.128024	0	0.230136	0.383376
chr3_47079155_47108608_-	hsa_circSETD2_057	hsa_circ_0004692	1290	SETD2	exon-exon	0.193901	0.790193	0.987141	no significant	0.128835	0.0560757	0.112021	0.207829	0.038356	0.095844
chr4_148778703_148803083_+	hsa_circARHGAP10_013	hsa_circ_0071106	650	ARHGAP10	exon-exon	0.193715	0.644001	0.950591	no significant	0.48313	0.672908	0.720136	0.914449	0.690407	0.607012
chr13_50025688_50042096_+	hsa_circSETDB2_006	hsa_circ_0030254	682	SETDB2	exon-exon	0.193676	0.754351	0.984418	no significant	0.193252	0.168227	0.192036	0.166263	0.421916	0.063896
chr17_49340634_49346265_+	hsa_circUTP18_003	hsa_circ_0002789	280	UTP18	exon-exon	0.187507	0.726406	0.979305	no significant	0.257669	0.168227	0.224042	0.290961	0.153424	0.287532
chr13_96622365_96651561_-	hsa_circUGGT2_017	hsa_circ_0101080	675	UGGT2	exon-exon	0.186533	0.77512	0.986838	no significant	0.161043	0.0560757	0.224042	0.124698	0.153424	0.223636
chr10_32197099_32199491_-	hsa_circARHGAP12_003	hsa_circ_0000231	794	ARHGAP12	exon-exon	0.185637	0.649797	0.950909	no significant	0.837425	1.34582	1.36026	1.28854	1.07397	1.72519
chr10_32832227_32912745_+	hsa_circCCDC7_023	hsa_circ_0093558	49850	CCDC7	exon-intergenic	0.18152	0.772408	0.986822	no significant	0.128835	0.149535	0.112021	0.207829	0.153424	0.095844
chr8_109462051_109468159_+	hsa_circEMC2_002	hsa_circ_0135459	323	EMC2	exon-exon	0.179297	0.778488	0.987141	no significant	0.22546	0.0934594	0.128024	0.249395	0.115068	0.127792
chr2_15629017_15651474_-	hsa_circNBAS_044	hsa_circ_0000978	337	NBAS	exon-exon	0.176184	0.758615	0.984418	no significant	0.128835	0.224303	0.176033	0.166263	0.153424	0.287532
chr16_3900297_3901010_-	hsa_circCREBBP_007	hsa_circ_0007637	713	CREBBP	exon-exon	0.172719	0.772954	0.986822	no significant	0.22546	0.168227	0.112021	0.124698	0.230136	0.191688
chr7_139415730_139416814_-	hsa_circHIPK2_003	hsa_circ_0001756	1084	HIPK2	exon-exon	0.169653	0.748951	0.980865	no significant	0.418712	0.467297	0.112021	0.332527	0.345204	0.415324
chr7_23015828_23023664_-	hsa_circFAM126A_008	hsa_circ_0001971	575	FAM126A	exon-exon	0.168862	0.76098	0.984418	no significant	0.128835	0.29907	0.272051	0.166263	0.153424	0.47922
chr5_65284462_65310553_+	hsa_circERBB2IP_006	hsa_circ_0001493	590	ERBB2IP	exon-exon	0.168343	0.716439	0.977849	no significant	0.257669	0.336454	0.304058	0.290961	0.421916	0.31948
chr7_24663284_24708279_+	hsa_circMPP6_024	hsa_circ_0001686	1116	MPP6	exon-exon	0.165969	0.717738	0.977849	no significant	0.740799	0.710292	0.976185	0.332527	1.15068	1.24597
chr4_87967317_87968746_+	hsa_circAFF1_005	hsa_circ_0001423	1021	AFF1	exon-exon	0.165067	0.699554	0.970993	no significant	0.773007	1.02805	1.15222	1.62107	1.11232	0.670908
chr18_39607406_39629569_+	hsa_circPIK3C3_033	hsa_circ_0007765	779	PIK3C3	exon-exon	0.164566	0.81441	0.987141	no significant	0.161043	0.0747676	0.176033	0.0831317	0.038356	0.31948
chr2_215632205_215661841_-	hsa_circBARD1_003	hsa_circ_0058051	1410	BARD1	exon-exon	0.163833	0.825702	0.989858	no significant	0	0.149535	0.112021	0.0831317	0.115068	0.127792
chr15_80412669_80415142_+	hsa_circZFAND6_008	hsa_circ_0000643	381	ZFAND6	exon-exon	0.163393	0.696669	0.968891	no significant	0.837425	0.6916	0.640121	1.12228	0.652051	0.670908
chr3_47466974_47470160_-	hsa_circSCAP_030	hsa_circ_0007291	785	SCAP	exon-exon	0.163009	0.827908	0.990278	no significant	0.128835	0.0934594	0.112021	0.0415659	0.306848	0.031948
chr18_56363597_56367823_+	hsa_circMALT1_003	hsa_circ_0000853	273	MALT1	exon-exon	0.162904	0.796954	0.987141	no significant	0.161043	0.149535	0.0960182	0.207829	0.153424	0.095844
chr20_57014000_57016139_+	hsa_circVAPB_007	hsa_circ_0001173	258	VAPB	exon-exon	0.162255	0.733159	0.979305	no significant	1.06288	0.29907	0.544103	0.831317	0.652051	0.607012
chr5_167915606_167921655_+	hsa_circRARS_004	hsa_circ_0001550	534	RARS	exon-exon	0.160528	0.689045	0.967164	no significant	1.80368	2.35518	1.88836	1.78733	1.80273	3.1948
chr18_19345732_19359646_+	hsa_circMIB1_006	hsa_circ_0000835	679	MIB1	exon-exon	0.159964	0.743308	0.980865	no significant	0.386504	0.224303	0.416079	0.581922	0.230136	0.351428
chr20_32684462_32686439_-	hsa_circEIF2S2_001	hsa_circ_0007938	386	EIF2S2	exon-exon	0.159298	0.809821	0.987141	no significant	0.128835	0.0747676	0.128024	0.124698	0.153424	0.095844
chrX_139866135_139866261_+	NA	NA		not_annotated	intergenic-intergenic	0.157063	0.809984	0.987141	no significant	0.354295	0.130843	0.0800151	0.0831317	0.268492	0.223636
chr18_9583114_9595151_-	hsa_circPPP4R1_012	hsa_circ_0007509	866	PPP4R1	exon-exon	0.156581	0.733444	0.979305	no significant	0.257669	0.429913	0.336064	0.290961	0.460272	0.415324
chr15_62299506_62306191_-	hsa_circVPS13C_022	hsa_circ_0000607	606	VPS13C	exon-exon	0.155327	0.71013	0.976047	no significant	0.837425	0.766367	1.44027	1.33011	1.11232	1.02234
chr2_24103508_24108699_-	hsa_circATAD2B_016	hsa_circ_0052963	329	ATAD2B	exon-exon	0.154897	0.839955	0.990278	no significant	0.161043	0.0934594	0.0320061	0.0415659	0.115068	0.127792
chr1_219366423_219414650_+	hsa_circLYPLAL1_006	hsa_circ_0004417	30103	LYPLAL1	exon-intergenic	0.153334	0.734025	0.979305	no significant	0.515338	0.317762	0.36807	0.332527	0.460272	0.511168
chr7_131071878_131084192_+	hsa_circMKLN1_019	hsa_circ_0001747	535	MKLN1	exon-exon	0.152777	0.796928	0.987141	no significant	0.0644173	0.242995	0.240045	0.166263	0.153424	0.31948
chr5_145197456_145205763_-	hsa_circPRELID2_001	hsa_circ_0006528	496	PRELID2	exon-exon	0.151216	0.821409	0.989858	no significant	0.161043	0.112151	0.0960182	0.0415659	0.115068	0.223636
chr10_95140975_95148911_-	hsa_circMYOF_017	hsa_circ_0005898	420	MYOF	exon-exon	0.148665	0.784494	0.987141	no significant	0.128835	0.336454	0.224042	0.124698	0.306848	0.351428
chr12_120995084_120995485_+	hsa_circRNF10_015	hsa_circ_0028899	322	RNF10	exon-exon	0.147722	0.81323	0.987141	no significant	0.193252	0.130843	0.176033	0.290961	0.038356	0.223636
chr20_2928627_2945848_+	hsa_circPTPRA_008	hsa_circ_0005265	554	PTPRA	exon-exon	0.147716	0.787418	0.987141	no significant	0.354295	0.130843	0.208039	0.249395	0.230136	0.255584
chr3_149563797_149639014_+	hsa_circRNF13_009	hsa_circ_0001346	716	RNF13	exon-exon	0.147401	0.744622	0.980865	no significant	0.644173	0.616832	0.832157	0.997581	1.03561	0.351428
chr6_76344422_76388643_+	hsa_circSENP6_018	hsa_circ_0001613	1722	SENP6	exon-exon	0.145597	0.807782	0.987141	no significant	0.22546	0.0934594	0.240045	0.124698	0.19178	0.287532
chr4_15626874_15646331_-	hsa_circFBXL5_004	hsa_circ_0069227	1870	FBXL5	exon-exon	0.144504	0.852054	0.990278	no significant	0.0644173	0.0560757	0.16003	0.166263	0	0.15974
chr3_185316199_185331196_+	hsa_circSENP2_007	hsa_circ_0123058	776	SENP2	exon-exon	0.143746	0.846481	0.990278	no significant	0.161043	0.112151	0.0640121	0.0415659	0.038356	0.255584
chr17_28811231_28819771_+	hsa_circGOSR1_006	hsa_circ_0007460	363	GOSR1	exon-exon	0.14169	0.849533	0.990278	no significant	0.0644173	0.130843	0.112021	0	0.0767119	0.255584
chr2_110342702_110343415_-	hsa_circSEPT10_008	hsa_circ_0056012	314	SEPT10	exon-exon	0.140395	0.846595	0.990278	no significant	0.193252	0.0373838	0.0960182	0.124698	0.115068	0.095844
chr5_176636636_176639196_+	hsa_circNSD1_016	hsa_circ_0075161	2560	NSD1	exon-exon	0.139026	0.802529	0.987141	no significant	0.257669	0.186919	0.224042	0.332527	0.0767119	0.31948
chr1_153637695_153641033_-	hsa_circILF2_011	hsa_circ_0000133	469	ILF2	exon-exon	0.138035	0.824668	0.989858	no significant	0.193252	0.112151	0.112021	0.124698	0.153424	0.15974
chr19_45766370_45766625_+	hsa_circMARK4_004	hsa_circ_0000940	103	MARK4	exon-exon	0.137284	0.850697	0.990278	no significant	0.289878	0.0560757	0.0640121	0.166263	0.0767119	0.15974
chr18_51797729_51804225_+	hsa_circPOLI_004	hsa_circ_0047719	444	POLI	exon-exon	0.135942	0.837382	0.990278	no significant	0.0644173	0.112151	0.224042	0.166263	0.0767119	0.223636
chr14_39648294_39648666_+	hsa_circPNN_004	hsa_circ_0101802	295	PNN	exon-exon	0.132835	0.783333	0.987141	no significant	0.450921	0.355146	0.400076	0.207829	0.345204	0.734804
chr7_64004084_64004810_-	hsa_circZNF680_003	hsa_circ_0002566	223	ZNF680	exon-exon	0.129046	0.81953	0.989175	no significant	0.161043	0.205611	0.192036	0.124698	0.306848	0.191688
chr8_141828375_141900868_-	hsa_circPTK2_024	hsa_circ_0005982	899	PTK2	exon-exon	0.129009	0.782735	0.987141	no significant	0.611964	0.29907	0.5281	0.457225	0.767119	0.351428
chr9_86293355_86301070_-	hsa_circUBQLN1_004	hsa_circ_0087357	690	UBQLN1	exon-exon	0.12844	0.786082	0.987141	no significant	0.354295	0.280378	0.448085	0.207829	0.498628	0.47922
chr4_56269402_56284152_+	hsa_circTMEM165_003	hsa_circ_0126620	688	TMEM165	exon-exon	0.127258	0.871795	0.990278	no significant	0.0966259	0.149535	0.0320061	0.124698	0.153424	0.031948
chr21_47768925_47769734_+	hsa_circPCNT_014	hsa_circ_0002903	312	PCNT	exon-exon	0.124838	0.825717	0.989858	no significant	0.22546	0.261686	0.128024	0.166263	0.306848	0.191688
chr14_32559707_32586493_+	hsa_circARHGAP5_004	hsa_circ_0031584	4033	ARHGAP5	exon-exon	0.122686	0.814433	0.987141	no significant	0.322086	0.224303	0.224042	0.374093	0.345204	0.127792
chr15_81262802_81274523_-	hsa_circMESDC2_004	hsa_circ_0005558	9249	MESDC2	intergenic-exon	0.122166	0.860201	0.990278	no significant	0.128835	0.0934594	0.112021	0.0831317	0.038356	0.223636
chr2_231307651_231314970_+	hsa_circSP100_009	hsa_circ_0003922	713	SP100	exon-exon	0.121514	0.77706	0.987141	no significant	0.547547	0.728984	0.592112	0.457225	0.652051	0.926492
chr15_76146726_76165909_+	hsa_circUBE2Q2_003	hsa_circ_0104564	408	UBE2Q2	exon-exon	0.121066	0.858908	0.990278	no significant	0.128835	0.112151	0.176033	0	0.153424	0.287532
chr2_24205765_24207701_+	hsa_circUBXN2A_012	hsa_circ_0003947	297	UBXN2A	exon-exon	0.119513	0.875166	0.990278	no significant	0.193252	0.112151	0.0320061	0.207829	0.0767119	0.063896
chr6_3076997_3078169_+	hsa_circRIPK1_001	hsa_circ_0001571	381	RIPK1	intergenic-exon	0.119161	0.856204	0.990278	no significant	0.257669	0.280378	0.0480091	0.0831317	0.268492	0.255584
chr6_7181356_7189555_+	hsa_circRREB1_011	hsa_circ_0007429	590	RREB1	exon-exon	0.11887	0.881628	0.990278	no significant	0	0.0747676	0.192036	0.0415659	0.153424	0.127792
chr3_149563797_149589941_+	hsa_circRNF13_004	hsa_circ_0067716	337	RNF13	exon-exon	0.117147	0.840282	0.990278	no significant	0.161043	0.168227	0.176033	0.207829	0.230136	0.127792
chr8_42812236_42819617_+	hsa_circHOOK3_045	hsa_circ_0006376	311	HOOK3	exon-exon	0.116505	0.853422	0.990278	no significant	0.161043	0.242995	0.0960182	0.124698	0.115068	0.287532
chr16_69729038_69729282_+	hsa_circNFAT5_021	hsa_circ_0006845	244	NFAT5	exon-exon	0.115784	0.853108	0.990278	no significant	0.354295	0.186919	0.112021	0.166263	0.421916	0.095844
chr18_51797729_51800460_+	hsa_circPOLI_002	hsa_circ_0007180	291	POLI	exon-exon	0.115725	0.876582	0.990278	no significant	0.22546	0.112151	0.0320061	0.0415659	0.19178	0.127792
chr6_160467529_160469575_+	hsa_circIGF2R_017	hsa_circ_0131235	611	IGF2R	exon-exon	0.114281	0.862503	0.990278	no significant	0.289878	0.0747676	0.144027	0.290961	0.0767119	0.15974
chr18_74561481_74593468_+	hsa_circZNF236_014	hsa_circ_0000857	1362	ZNF236	exon-exon	0.112823	0.886185	0.990278	no significant	0.161043	0.0560757	0.0800151	0.166263	0.153424	0
chr7_8257934_8275635_-	hsa_circICA1_001	hsa_circ_0079422	658	ICA1	exon-exon	0.110976	0.888268	0.990278	no significant	0.0644173	0.130843	0.144027	0.332527	0.0767119	0
chr15_59204761_59209198_-	hsa_circSLTM_007	hsa_circ_0000605	311	SLTM	exon-exon	0.110585	0.804012	0.987141	no significant	0.579755	0.39253	0.768145	0.70662	0.767119	0.447272
chr10_112723882_112745523_+	hsa_circSHOC2_007	hsa_circ_0020028	1075	SHOC2	exon-exon	0.110537	0.797447	0.987141	no significant	0.579755	0.747676	0.512097	0.665054	0.460272	0.862596
chr13_100909848_100925600_+	hsa_circPCCA_022	hsa_circ_0000500	428	PCCA	exon-exon	0.109392	0.859866	0.990278	no significant	0.128835	0.112151	0.16003	0.166263	0.115068	0.15974
chr5_94224583_94259726_-	hsa_circMCTP1_020	hsa_circ_0130054	721	MCTP1	exon-exon	0.107578	0.880078	0.990278	no significant	0.0322086	0.149535	0.272051	0.374093	0.0767119	0.095844
chr6_7176887_7189555_+	hsa_circRREB1_005	hsa_circ_0001573	709	RREB1	exon-exon	0.105858	0.848142	0.990278	no significant	0.193252	0.205611	0.176033	0.166263	0.19178	0.255584
chr8_52773404_52773806_-	hsa_circPCMTD1_004	hsa_circ_0001801	402	PCMTD1	exon-exon	0.105117	0.799325	0.987141	no significant	2.2224	1.17759	2.44846	2.66022	1.80273	1.88493
chr14_23375403_23380612_-	hsa_circRBM23_005	hsa_circ_0031241	411	RBM23	exon-exon	0.104873	0.844776	0.990278	no significant	0.193252	0.242995	0.208039	0.332527	0.19178	0.191688
chr9_113734352_113735838_-	hsa_circLPAR1_015	hsa_circ_0087960	226	LPAR1	exon-exon	0.100777	0.809644	0.987141	no significant	1.93252	0.971978	1.08821	1.24698	1.76437	1.24597
chr14_75016565_75022396_-	hsa_circLTBP2_004	hsa_circ_0008641	959	LTBP2	exon-exon	0.0981344	0.89697	0.990278	no significant	0.0322086	0.130843	0.144027	0.0415659	0.038356	0.255584
chr17_80721840_80739597_+	hsa_circTBCD_023	hsa_circ_0000818	536	TBCD	exon-exon	0.0980604	0.875107	0.990278	no significant	0.257669	0.186919	0.272051	0.124698	0.038356	0.575064
chr16_29845053_29845387_+	hsa_circMVP_006	hsa_circ_0000688	256	MVP	exon-exon	0.0966002	0.871794	0.990278	no significant	0.0644173	0.205611	0.240045	0.207829	0.153424	0.223636
chr10_105382226_105420872_-	hsa_circSH3PXD2A_009	hsa_circ_0005620	4865	SH3PXD2A	intergenic-exon	0.0962629	0.848851	0.990278	no significant	0.773007	0.841135	0.432082	0.207829	0.690407	1.24597
chr13_76195898_76301234_+	NA	NA		LMO7	exon-exon	0.0946363	0.903488	0.990278	no significant	0.128835	0.0186919	0.192036	0.0415659	0.230136	0.095844
chr14_66028054_66028484_+	hsa_circFUT8_014	hsa_circ_0003028	430	FUT8	exon-exon	0.0938828	0.869603	0.990278	no significant	0.257669	0.205611	0.144027	0.207829	0.306848	0.127792
chr13_49771012_49772710_+	hsa_circFNDC3A_029	hsa_circ_0005263	761	FNDC3A	exon-exon	0.0935313	0.897219	0.990278	no significant	0.128835	0.0747676	0.112021	0.0415659	0.230136	0.063896
chr11_118454523_118455359_+	hsa_circARCN1_008	hsa_circ_0005589	371	ARCN1	exon-exon	0.0934037	0.891217	0.990278	no significant	0.128835	0.0747676	0.144027	0.207829	0.115068	0.063896
chr22_38890634_38897285_-	hsa_circDDX17_007	hsa_circ_0002211	927	DDX17	exon-exon	0.0930557	0.872106	0.990278	no significant	0.322086	0.149535	0.144027	0.207829	0.153424	0.255584
chr17_4186092_4200109_-	hsa_circUBE2G1_015	hsa_circ_0003239	401	UBE2G1	exon-exon	0.0890252	0.892991	0.990278	no significant	0.0966259	0.168227	0.128024	0.0415659	0.115068	0.255584
chr15_41961025_41962156_+	hsa_circMGA_003	hsa_circ_0000591	1131	MGA	exon-exon	0.0878663	0.822574	0.989858	no significant	1.15951	1.19628	1.32825	1.5795	1.07397	1.30987
chr7_77200394_77230123_+	hsa_circPTPN12_006	hsa_circ_0080835	596	PTPN12	exon-exon	0.087722	0.901765	0.990278	no significant	0.0644173	0.168227	0.176033	0	0.115068	0.31948
chr7_6840578_6841154_-	hsa_circCCZ1B_015	hsa_circ_0007135	287	CCZ1B	exon-exon	0.0875952	0.8694	0.990278	no significant	0.128835	0.261686	0.272051	0.290961	0.268492	0.191688
chr5_95072592_95119667_+	hsa_circRHOBTB3_008	hsa_circ_0073435	1395	RHOBTB3	exon-exon	0.0836763	0.904886	0.990278	no significant	0.193252	0.0560757	0.112021	0.0415659	0.115068	0.191688
chr1_16044387_16047883_+	hsa_circPLEKHM2_005	hsa_circ_0000021	435	PLEKHM2	exon-exon	0.0807717	0.856792	0.990278	no significant	0.515338	0.39253	0.464088	0.290961	0.498628	0.63896
chr19_18650180_18650530_-	hsa_circFKBP8_005	hsa_circ_0000915	259	FKBP8	exon-exon	0.0793439	0.883446	0.990278	no significant	0.161043	0.224303	0.224042	0.207829	0.268492	0.191688
chr11_120916382_120930794_+	hsa_circTBCEL_010	hsa_circ_0003302	973	TBCEL	exon-exon	0.0776605	0.860098	0.990278	no significant	0.418712	0.504681	0.36807	0.540356	0.460272	0.383376
chr18_44526019_44526886_+	hsa_circKATNAL2_001	hsa_circ_0108513	289	KATNAL2	intergenic-exon	0.0775994	0.897819	0.990278	no significant	0.289878	0.0934594	0.192036	0.207829	0.115068	0.255584
chr18_46858233_46906128_-	hsa_circDYM_011	hsa_circ_0002501	570	DYM	exon-exon	0.0755218	0.898217	0.990278	no significant	0.193252	0.224303	0.112021	0.166263	0.19178	0.191688
chr7_72361165_72361649_+	hsa_circPOM121_003	hsa_circ_0003261	305	POM121	exon-exon	0.0754437	0.911337	0.990379	no significant	0.0644173	0.29907	0.0960182	0.124698	0.115068	0.255584
chr6_82923943_82924546_-	hsa_circIBTK_023	hsa_circ_0132391	603	IBTK	exon-exon	0.0748389	0.868671	0.990278	no significant	0.418712	0.448605	0.352067	0.540356	0.268492	0.47922
chr8_141889569_141900868_-	hsa_circPTK2_018	hsa_circ_0006646	394	PTK2	exon-exon	0.0732581	0.90495	0.990278	no significant	0.193252	0.130843	0.176033	0.290961	0.153424	0.095844
chr11_46098304_46113774_-	hsa_circPHF21A_005	hsa_circ_0000296	277	PHF21A	exon-exon	0.0714759	0.896775	0.990278	no significant	0.22546	0.130843	0.36807	0.332527	0.268492	0.191688
chr7_91924202_91936970_+	hsa_circANKIB1_003	hsa_circ_0135061	576	ANKIB1	exon-exon	0.0689595	0.901492	0.990278	no significant	0.161043	0.242995	0.176033	0.166263	0.19178	0.255584
chr1_21083658_21100103_-	hsa_circHP1BP3_027	hsa_circ_0000024	631	HP1BP3	exon-exon	0.06557	0.890277	0.990278	no significant	0.22546	0.523373	0.512097	0.290961	0.421916	0.63896
chr1_58971731_59002413_-	hsa_circOMA1_010	hsa_circ_0000072	865	OMA1	exon-exon	0.0650339	0.92037	0.990379	no significant	0.322086	0.0934594	0.112021	0.207829	0.0767119	0.223636
chr2_216238044_216256537_-	hsa_circFN1_075	hsa_circ_0058092	2178	FN1	exon-exon	0.0648307	0.904691	0.990278	no significant	3.51074	2.2991	3.04058	0.457225	3.68217	5.11168
chr5_151169883_151170623_+	hsa_circG3BP1_014	hsa_circ_0003967	256	G3BP1	exon-exon	0.0635448	0.92221	0.990379	no significant	0.193252	0.130843	0.0800151	0.0831317	0.115068	0.191688
chr18_29691716_29693823_+	hsa_circRNF138_002	hsa_circ_0005729	282	RNF138	exon-exon	0.0629566	0.927742	0.990379	no significant	0.161043	0.130843	0.0800151	0.207829	0.153424	0.031948
chr5_179132679_179137066_+	hsa_circCANX_006	hsa_circ_0001564	724	CANX	exon-exon	0.0611992	0.931031	0.990379	no significant	0.161043	0.0373838	0.192036	0.207829	0.0767119	0.127792
chr2_234296902_234299129_+	hsa_circDGKD_005	hsa_circ_0001112	192	DGKD	exon-exon	0.0596209	0.93404	0.990379	no significant	0.193252	0.0747676	0.0800151	0.166263	0.153424	0.031948
chrY_2821949_2829687_+	hsa_circZFY_001	hsa_circ_0001953	662	ZFY	exon-exon	0.0594748	0.929685	0.990379	no significant	1.06288	0	0.816154	0.748186	0.460272	0.734804
chr17_49118861_49133843_-	hsa_circSPAG9_006	hsa_circ_0002605	317	SPAG9	exon-exon	0.0576862	0.936885	0.990379	no significant	0.161043	0.0934594	0.0800151	0.207829	0	0.127792
chr10_31661946_31676727_+	hsa_circZEB1_014	hsa_circ_0003793	14781	not_annotated	intergenic-intergenic	0.0543468	0.938759	0.990379	no significant	0.161043	0.168227	0.0800151	0.290961	0.115068	0.031948
chr16_88008653_88017865_+	hsa_circBANP_004	hsa_circ_0040809	448	BANP	exon-exon	0.0521267	0.937005	0.990379	no significant	0.128835	0.0747676	0.208039	0.0831317	0.19178	0.15974
chr6_137015277_137019820_-	hsa_circMAP3K5_014	hsa_circ_0006856	641	MAP3K5	exon-exon	0.0519248	0.941934	0.990379	no significant	0.0644173	0.168227	0.112021	0.207829	0.153424	0.031948
chr2_61339656_61345251_+	hsa_circKIAA1841_038	hsa_circ_0001013	3741	KIAA1841	intergenic-exon	0.0504707	0.92822	0.990379	no significant	0.22546	0.242995	0.192036	0.166263	0.115068	0.383376
chr15_52161413_52194233_+	hsa_circTMOD3_009	hsa_circ_0035292	898	TMOD3	exon-exon	0.0490572	0.932064	0.990379	no significant	0.22546	0.168227	0.176033	0.0831317	0.230136	0.255584
chr3_171969049_172016577_+	hsa_circFNDC3B_037	hsa_circ_0067990	553	FNDC3B	exon-exon	0.0490171	0.942456	0.990379	no significant	0.0644173	0.224303	0.112021	0.0415659	0.19178	0.191688
chr9_37126308_37147442_+	hsa_circZCCHC7_008	hsa_circ_0138745	21134	ZCCHC7	exon-intergenic	0.048748	0.925959	0.990379	no significant	0.354295	0.261686	0.16003	0.207829	0.345204	0.223636
chr1_146724277_146731572_+	hsa_circCHD1L_003	hsa_circ_0004220	449	CHD1L	exon-exon	0.0465677	0.946707	0.990379	no significant	0.0644173	0.168227	0.16003	0	0.153424	0.255584
chr12_69644908_69656342_+	hsa_circCPSF6_006	hsa_circ_0000417	1599	CPSF6	exon-exon	0.045419	0.941934	0.990379	no significant	0.450921	0.149535	0.0960182	0.166263	0.345204	0.15974
chr10_32740519_32770710_+	hsa_circCCDC7_008	hsa_circ_0093547	8606	CCDC7	exon-intergenic	0.0432713	0.952277	0.990843	no significant	0.0644173	0.0934594	0.112021	0.0415659	0.115068	0.127792
chr7_73770739_73771807_+	hsa_circCLIP2_024	hsa_circ_0002755	412	CLIP2	exon-exon	0.0432713	0.952277	0.990843	no significant	0.0644173	0.0934594	0.112021	0.0415659	0.115068	0.127792
chr2_99786012_99787892_-	hsa_circMITD1_002	hsa_circ_0001050	264	MITD1	exon-exon	0.0425903	0.948274	0.990379	no significant	0.193252	0.168227	0.192036	0.415659	0.153424	0.031948
chr3_110830876_110845182_+	hsa_circPVRL3_007	hsa_circ_0066776	909	PVRL3	exon-exon	0.0421027	0.945837	0.990379	no significant	0.0966259	0.186919	0.224042	0.0831317	0.306848	0.15974
chr18_9208654_9221997_+	hsa_circANKRD12_029	hsa_circ_0003652	639	ANKRD12	exon-exon	0.041691	0.95203	0.990843	no significant	0.0644173	0.0934594	0.176033	0.166263	0.0767119	0.127792
chr9_96233422_96261168_+	hsa_circFAM120A_007	hsa_circ_0001875	556	FAM120A	exon-exon	0.0397908	0.930695	0.990379	no significant	0.354295	0.560757	0.432082	0.415659	0.306848	0.670908
chr5_176370335_176385155_-	hsa_circUIMC1_012	hsa_circ_0001558	397	UIMC1	exon-exon	0.0379459	0.940459	0.990379	no significant	0.386504	0.59814	0.288055	0.789752	0.230136	0.31948
chr6_90461149_90472249_-	hsa_circMDN1_035	hsa_circ_0003814	1083	MDN1	exon-exon	0.0379385	0.956327	0.99363	no significant	0.0644173	0.130843	0.112021	0.166263	0.0767119	0.095844
chr7_80418621_80440017_-	hsa_circSEMA3C_021	hsa_circ_0004365	907	SEMA3C	exon-exon	0.0360741	0.944945	0.990379	no significant	0.676381	0.59814	0.592112	0.374093	0.19178	1.30987
chr9_14639893_14680160_-	hsa_circZDHHC21_004	hsa_circ_0008952	796	ZDHHC21	exon-exon	0.0321781	0.94633	0.990379	no significant	0.322086	0.242995	0.400076	0.332527	0.421916	0.255584
chr22_46096161_46136418_+	hsa_circATXN10_019	hsa_circ_0001246	782	ATXN10	exon-exon	0.030795	0.952798	0.990843	no significant	0.354295	0.355146	0.448085	0.124698	0.268492	0.766752
chr4_48686689_48712715_-	hsa_circFRYL_006	hsa_circ_0002021	303	FRYL	exon-exon	0.0279646	0.967686	0.996229	no significant	0.128835	0.0934594	0.208039	0.290961	0.115068	0.063896
chr10_103552595_103570071_-	hsa_circMGEA5_021	hsa_circ_0019607	1826	MGEA5	exon-exon	0.0269861	0.958038	0.994526	no significant	0.418712	0.224303	0.208039	0.207829	0.19178	0.415324
chr13_96636057_96651561_-	hsa_circUGGT2_016	hsa_circ_0030632	432	UGGT2	exon-exon	0.0259856	0.975498	0.996305	no significant	0.0322086	0.411222	0.0480091	0.332527	0	0.191688
chr11_34978930_34999729_+	hsa_circPDHX_013	hsa_circ_0021712	681	PDHX	exon-exon	0.025936	0.963747	0.995816	no significant	0.257669	0.224303	0.224042	0.374093	0.306848	0.063896
chr1_78267015_78280916_+	hsa_circFAM73A_006	hsa_circ_0002570	700	FAM73A	exon-exon	0.0255981	0.971531	0.996229	no significant	0.0966259	0.0747676	0.240045	0.0415659	0.268492	0.127792
chrX_51638148_51640367_+	hsa_circMAGED1_004	hsa_circ_0008983	1441	MAGED1	exon-exon	0.0253022	0.971361	0.996229	no significant	0.161043	0.168227	0.0480091	0.207829	0.038356	0.127792
chr4_39739039_39779430_+	hsa_circUBE2K_014	hsa_circ_0069492	465	UBE2K	exon-exon	0.0212403	0.971263	0.996229	no significant	0.22546	0.130843	0.192036	0.0831317	0.268492	0.191688
chr7_155457868_155473602_+	hsa_circRBM33_006	hsa_circ_0001771	524	RBM33	exon-exon	0.0202921	0.974905	0.996305	no significant	0.354295	0.112151	0.128024	0.374093	0.115068	0.095844
chr1_150997086_150998149_+	hsa_circPRUNE_004	hsa_circ_0006760	344	PRUNE	exon-exon	0.01709	0.979589	0.996414	no significant	0.161043	0.242995	0.0800151	0.290961	0.115068	0.095844
chr9_37126308_37126939_+	hsa_circZCCHC7_006	hsa_circ_0001860	631	ZCCHC7	exon-exon	0.0160197	0.973719	0.996305	no significant	0.193252	0.467297	0.416079	0.249395	0.498628	0.383376
chr3_5215701_5216099_+	hsa_circARL8B_007	hsa_circ_0001263	139	ARL8B	exon-exon	0.0145408	0.980737	0.996414	no significant	0.22546	0.130843	0.128024	0.124698	0.0767119	0.255584
chr15_89656955_89698765_+	hsa_circABHD2_008	hsa_circ_0036683	644	ABHD2	exon-exon	0.0138308	0.983863	0.996618	no significant	0.0644173	0.168227	0.112021	0.0831317	0.153424	0.127792
chr20_39721111_39729993_+	hsa_circTOP1_008	hsa_circ_0115215	694	TOP1	exon-exon	0.0130603	0.98099	0.996414	no significant	0.161043	0.224303	0.304058	0.124698	0.230136	0.351428
chr6_76344422_76373234_+	hsa_circSENP6_016	hsa_circ_0077083	641	SENP6	exon-exon	0.00853433	0.98932	0.998202	no significant	0.354295	0.0186919	0.0800151	0.166263	0.153424	0.095844
chr20_36685933_36694658_+	hsa_circRPRD1B_004	hsa_circ_0007365	416	RPRD1B	exon-exon	0.00577081	0.993599	0.998202	no significant	0.0966259	0.29907	0.144027	0.207829	0.306848	0.063896
chr12_109046047_109048186_-	hsa_circCORO1C_029	hsa_circ_0000437	251	CORO1C	exon-exon	0.0046166	0.990238	0.998202	no significant	2.12577	1.98134	2.49647	1.99516	2.18629	2.49194
chr1_173961892_173962273_-	hsa_circRC3H1_001	hsa_circ_0004927	381	RC3H1	exon-intergenic	0.00440895	0.994192	0.998202	no significant	0.128835	0.0934594	0.0480091	0.124698	0	0.127792
chr11_68334481_68343511_+	hsa_circPPP6R3_045	hsa_circ_0002038	570	PPP6R3	exon-exon	0.00391253	0.994886	0.998202	no significant	0.22546	0.130843	0.0800151	0.166263	0.230136	0.031948
chr3_47139444_47147610_-	hsa_circSETD2_025	hsa_circ_0001290	427	SETD2	exon-exon	0.00325754	0.994669	0.998202	no significant	0.48313	0.0747676	0.208039	0.207829	0.153424	0.351428
chr1_93128275_93170301_-	hsa_circEVI5_015	hsa_circ_0114495	38986	EVI5	intergenic-exon	-0.000836433	0.997562	0.998414	no significant	0.0644173	0.130843	0.16003	0.249395	0.115068	0.031948
chr8_141828375_141874498_-	hsa_circPTK2_047	hsa_circ_0008345	505	PTK2	exon-exon	-0.00193693	0.998475	0.998475	no significant	0.22546	0.242995	0.112021	0.0415659	0.153424	0.351428
chr1_10155518_10165802_+	hsa_circUBE4B_004	hsa_circ_0005199	598	UBE4B	exon-exon	-0.00286661	0.995647	0.998202	no significant	0.0322086	0.205611	0.0800151	0.124698	0.19178	0.031948
chr10_103427642_103436193_-	hsa_circFBXW4_008	hsa_circ_0008362	510	FBXW4	exon-exon	-0.00345191	0.994183	0.998202	no significant	0.161043	0.485989	0.272051	0.332527	0.268492	0.351428
chr20_2944917_2945848_+	hsa_circPTPRA_009	hsa_circ_0006117	421	PTPRA	exon-exon	-0.0036888	0.993042	0.998202	no significant	0.611964	1.17759	1.55229	1.37167	1.03561	1.02234
chr8_42761315_42798588_+	hsa_circHOOK3_003	hsa_circ_0084143	343	HOOK3	exon-exon	-0.00396906	0.996509	0.998213	no significant	0.161043	0.0934594	0.0640121	0.124698	0.115068	0.063896
chr8_37971709_37976881_+	hsa_circASH2L_015	hsa_circ_0001790	362	ASH2L	exon-exon	-0.00456807	0.994256	0.998202	no significant	0.161043	0.0747676	0.176033	0.166263	0.19178	0.063896
chr1_22041881_22050588_-	hsa_circUSP48_026	hsa_circ_0112054	513	USP48	exon-exon	-0.00707726	0.99178	0.998202	no significant	0.0322086	0.0747676	0.16003	0	0.153424	0.127792
chr2_95814629_95819004_-	hsa_circMRPS5_003	hsa_circ_0121204	4375	ZNF514	exon-exon	-0.00724412	0.988518	0.998202	no significant	0.322086	0.261686	0.288055	0.49879	0.268492	0.127792
chr12_94562928_94580249_+	hsa_circPLXNC1_003	hsa_circ_0099504	377	PLXNC1	exon-exon	-0.0123273	0.983659	0.996618	no significant	0.418712	0.168227	0.208039	0.124698	0.19178	0.415324
chr10_70246900_70253327_-	hsa_circSLC25A16_013	hsa_circ_0003459	421	SLC25A16	exon-exon	-0.0138842	0.983348	0.996618	no significant	0.0322086	0.186919	0.0960182	0.166263	0.115068	0.063896
chr8_18622958_18662408_-	hsa_circPSD3_018	hsa_circ_0002111	538	PSD3	exon-exon	-0.0146524	0.977498	0.996414	no significant	0.901842	1.64489	1.69632	0.332527	2.64656	1.27792
chr9_19286766_19305525_+	hsa_circDENND4C_010	hsa_circ_0005684	4794	DENND4C	exon-exon	-0.0147055	0.978004	0.996414	no significant	0.193252	0.336454	0.208039	0.249395	0.38356	0.127792
chr18_74561481_74563895_+	hsa_circZNF236_009	hsa_circ_0004979	308	ZNF236	exon-exon	-0.0152455	0.975903	0.996305	no significant	0.322086	0.355146	0.192036	0.249395	0.38356	0.223636
chr11_82984689_82989872_-	hsa_circCCDC90B_007	hsa_circ_0096576	374	CCDC90B	exon-exon	-0.0173011	0.98111	0.996414	no significant	0.128835	0.168227	0.0480091	0.124698	0.115068	0.095844
chr16_68155889_68160513_+	hsa_circNFATC3_004	hsa_circ_0000711	1298	NFATC3	exon-exon	-0.0175475	0.964378	0.995816	no significant	1.25614	1.32712	1.72833	1.7042	1.38081	1.24597
chr1_117944807_117984947_+	hsa_circMAN1A2_009	hsa_circ_0000119	648	MAN1A2	exon-exon	-0.0194227	0.963145	0.995816	no significant	0.966259	0.710292	0.560106	0.789752	0.728763	0.670908
chr1_215342541_215345526_+	hsa_circKCNK2_004	hsa_circ_0008788	348	KCNK2	exon-exon	-0.0226572	0.973825	0.996305	no significant	0.161043	0.0560757	0.256048	0.0415659	0.268492	0.15974
chr3_140978964_141006295_+	hsa_circACPL2_002	hsa_circ_0067574	558	PXYLP1	exon-exon	-0.0240226	0.971578	0.996229	no significant	0.128835	0.205611	0.16003	0	0.153424	0.31948
chr5_134076752_134079742_+	hsa_circCAMLG_003	hsa_circ_0003154	527	CAMLG	exon-exon	-0.0263537	0.963333	0.995816	no significant	0.128835	0.261686	0.192036	0.166263	0.306848	0.127792
chr15_85656607_85669605_+	hsa_circPDE8A_030	hsa_circ_0036627	1139	PDE8A	exon-exon	-0.0265475	0.970189	0.996229	no significant	0.161043	0.242995	0.0480091	0.0831317	0.153424	0.191688
chr6_111208707_111211559_+	hsa_circAMD1_005	hsa_circ_0005954	317	AMD1	exon-exon	-0.027918	0.968382	0.996229	no significant	0.0644173	0.130843	0.0960182	0.124698	0.153424	0.031948
chr2_209209834_209212747_+	hsa_circPIKFYVE_034	hsa_circ_0001097	347	PIKFYVE	exon-exon	-0.0282499	0.966309	0.996229	no significant	0.128835	0.0934594	0.176033	0.0831317	0.0767119	0.223636
chr10_5827104_5842668_-	hsa_circGDI2_008	hsa_circ_0005379	674	GDI2	exon-exon	-0.0301338	0.963047	0.995816	no significant	0.0644173	0.130843	0.16003	0.207829	0.0767119	0.095844
chr21_40578033_40584633_-	hsa_circBRWD1_112	hsa_circ_0116009	506	BRWD1	exon-exon	-0.0323936	0.946692	0.990379	no significant	0.22546	0.261686	0.320061	0.290961	0.268492	0.255584
chr11_77336007_77340944_-	hsa_circCLNS1A_005	hsa_circ_0004593	347	CLNS1A	exon-exon	-0.0325406	0.963649	0.995816	no significant	0.0322086	0.112151	0.176033	0.249395	0.0767119	0.031948
chr6_155095122_155116273_+	hsa_circSCAF8_013	hsa_circ_0001654	576	SCAF8	exon-exon	-0.0347996	0.948972	0.990379	no significant	0.354295	0.224303	0.192036	0.124698	0.268492	0.31948
chr5_14741935_14758707_-	hsa_circANKH_009	hsa_circ_0003057	698	ANKH	exon-exon	-0.0365021	0.948844	0.990379	no significant	0.193252	0.261686	0.240045	0.0415659	0.38356	0.255584
chr18_56585502_56587865_+	hsa_circZNF532_007	hsa_circ_0047814	2363	ZNF532	exon-exon	-0.03884	0.932453	0.990379	no significant	0.289878	0.373838	0.336064	0.290961	0.345204	0.351428
chr5_43675612_43704502_+	hsa_circNNT_036	hsa_circ_0005585	623	NNT	exon-exon	-0.0397255	0.944981	0.990379	no significant	0.354295	0.224303	0.240045	0.0415659	0.230136	0.47922
chr7_33397466_33427756_+	hsa_circBBS9_041	hsa_circ_0008336	563	BBS9	exon-exon	-0.0435966	0.922621	0.990379	no significant	0.386504	0.429913	0.416079	0.457225	0.268492	0.47922
chr3_197541778_197547301_+	hsa_circLRCH3_004	hsa_circ_0002266	378	LRCH3	exon-exon	-0.0474401	0.917525	0.990379	no significant	0.48313	0.429913	0.560106	0.332527	0.345204	0.734804
chr22_21288066_21288532_+	hsa_circCRKL_002	hsa_circ_0001206	466	CRKL	exon-exon	-0.0480472	0.936578	0.990379	no significant	0.128835	0.242995	0.144027	0.166263	0.115068	0.223636
chr7_40027197_40041630_+	hsa_circCDK13_008	hsa_circ_0001699	1142	CDK13	exon-exon	-0.0510787	0.927427	0.990379	no significant	0.161043	0.224303	0.208039	0.124698	0.268492	0.191688
chr8_142264087_142264728_-	hsa_circTCONS_00015535_001	hsa_circ_0001829	641	SLC45A4	exon-exon	-0.0511138	0.915134	0.990379	no significant	0.386504	0.429913	0.384073	0.540356	0.498628	0.15974
chr3_119219541_119232566_+	hsa_circTIMMDC1_005	hsa_circ_0006884	402	TIMMDC1	exon-exon	-0.0514989	0.937362	0.990379	no significant	0.257669	0.168227	0.0960182	0.0831317	0.268492	0.127792
chr5_76342171_76344097_+	hsa_circAGGF1_014	hsa_circ_0008620	443	AGGF1	exon-exon	-0.0515681	0.931423	0.990379	no significant	0.161043	0.149535	0.208039	0.0831317	0.19178	0.223636
chr4_129857809_129880932_-	hsa_circSCLT1_025	hsa_circ_0070959	960	SCLT1	exon-exon	-0.0520967	0.935301	0.990379	no significant	0.0644173	0.149535	0.144027	0.124698	0.115068	0.127792
chr5_137320945_137324004_-	hsa_circFAM13B_024	hsa_circ_0001535	331	FAM13B	exon-exon	-0.0526836	0.897933	0.990278	no significant	1.41718	1.00936	1.24824	1.66263	0.920543	0.990388
chr19_34921480_34929671_+	hsa_circUBA2_007	hsa_circ_0006987	443	UBA2	exon-exon	-0.053564	0.923837	0.990379	no significant	0.322086	0.205611	0.176033	0.124698	0.230136	0.287532
chr1_78177431_78181553_-	hsa_circUSP33_041	hsa_circ_0005374	488	USP33	exon-exon	-0.0542953	0.929382	0.990379	no significant	0.161043	0.224303	0.112021	0.166263	0.153424	0.15974
chr11_85718584_85742653_-	hsa_circPICALM_018	hsa_circ_0023936	677	PICALM	exon-exon	-0.0544567	0.917018	0.990379	no significant	0.22546	0.429913	0.224042	0.374093	0.38356	0.127792
chr14_88883054_88904247_+	hsa_circSPATA7_009	hsa_circ_0102766	1043	SPATA7	exon-exon	-0.0565492	0.93386	0.990379	no significant	0.0322086	0.130843	0.224042	0.0831317	0.230136	0.095844
chr2_179400458_179407088_+	hsa_circLOC100506866_005	hsa_circ_0004305	1824	TTN-AS1	exon-exon	-0.0575506	0.911104	0.990379	no significant	0.193252	0.224303	0.320061	0.249395	0.19178	0.287532
chr6_13632601_13644961_-	hsa_circRANBP9_026	hsa_circ_0001577	1020	RANBP9	exon-exon	-0.0585882	0.895192	0.990278	no significant	0.547547	0.504681	0.624118	0.290961	0.575339	0.734804
chr2_32339706_32341281_+	hsa_circSPAST_024	hsa_circ_0002795	416	SPAST	exon-exon	-0.059217	0.9259	0.990379	no significant	0.0966259	0.130843	0.144027	0.166263	0.115068	0.095844
chr2_239090705_239093928_-	hsa_circILKAP_019	hsa_circ_0001116	411	ILKAP	exon-exon	-0.0619624	0.896249	0.990278	no significant	0.289878	0.355146	0.272051	0.374093	0.230136	0.287532
chr8_28013458_28019595_+	hsa_circELP3_016	hsa_circ_0001785	467	ELP3	exon-exon	-0.0634452	0.916467	0.990379	no significant	0.0966259	0.261686	0.16003	0.166263	0.230136	0.127792
chr9_6420911_6434173_+	hsa_circUHRF2_003	hsa_circ_0002359	491	UHRF2	exon-exon	-0.0641455	0.907557	0.990379	no significant	0.289878	0.355146	0.224042	0.332527	0.038356	0.447272
chr4_88116475_88116842_-	hsa_circKLHL8_006	hsa_circ_0002538	367	KLHL8	exon-exon	-0.0656178	0.876959	0.990278	no significant	0.901842	0.635524	0.560106	0.70662	0.536983	0.734804
chr7_155465560_155473602_+	hsa_circRBM33_012	hsa_circ_0001772	445	RBM33	exon-exon	-0.0657171	0.877756	0.990278	no significant	1.15951	0.878519	0.816154	1.33011	0.575339	0.830648
chr15_89656955_89659752_+	hsa_circABHD2_007	hsa_circ_0007099	300	ABHD2	exon-exon	-0.0665488	0.87084	0.990278	no significant	1.03068	0.934594	1.0562	0.623488	1.11232	1.15013
chr15_100871093_100874385_-	hsa_circADAMTS17_004	hsa_circ_0103076	3292	ADAMTS17	exon-intergenic	-0.0683876	0.922886	0.990379	no significant	0.128835	0.130843	0.208039	0.0415659	0.038356	0.351428
chr3_169831147_169840532_-	hsa_circPHC3_049	hsa_circ_0006893	565	PHC3	exon-exon	-0.0699006	0.920125	0.990379	no significant	0.128835	0.0934594	0.0960182	0.124698	0.115068	0.063896
chr5_131034609_131044965_-	hsa_circFNIP1_022	hsa_circ_0009030	496	FNIP1	exon-exon	-0.0715812	0.919909	0.990379	no significant	0.193252	0.0934594	0.112021	0	0.19178	0.15974
chr1_101372407_101387397_+	hsa_circSLC30A7_010	hsa_circ_0000098	660	SLC30A7	exon-exon	-0.0727055	0.924114	0.990379	no significant	0.0644173	0.130843	0.112021	0.249395	0.0767119	0
chr2_43969879_43973102_+	hsa_circPLEKHH2_013	hsa_circ_0120105	432	PLEKHH2	exon-exon	-0.0728184	0.893573	0.990278	no significant	0.193252	0.168227	0.352067	0.207829	0.306848	0.191688
chr8_29959413_29962002_+	hsa_circLEPROTL1_003	hsa_circ_0007353	263	LEPROTL1	exon-exon	-0.073716	0.919234	0.990379	no significant	0.161043	0.0373838	0.16003	0.124698	0.153424	0.063896
chr6_76412360_76412788_+	hsa_circSENP6_051	hsa_circ_0001614	428	SENP6	exon-exon	-0.0742845	0.873879	0.990278	no significant	0.289878	0.39253	0.640121	0.581922	0.38356	0.351428
chr2_225400244_225422573_-	hsa_circCUL3_002	hsa_circ_0008309	312	CUL3	exon-exon	-0.0752544	0.904238	0.990278	no significant	0.128835	0.112151	0.176033	0.124698	0.153424	0.127792
chr12_100676720_100691953_+	hsa_circSCYL2_003	hsa_circ_0006258	508	SCYL2	exon-exon	-0.0754066	0.90146	0.990278	no significant	0.128835	0.186919	0.176033	0.249395	0.0767119	0.15974
chr2_24181170_24199945_+	hsa_circUBXN2A_002	hsa_circ_0005970	301	UBXN2A	exon-exon	-0.0762546	0.918533	0.990379	no significant	0.128835	0.130843	0.0640121	0.207829	0.038356	0.063896
chr10_71912018_71921687_-	hsa_circSAR1A_006	hsa_circ_0005624	826	SAR1A	exon-exon	-0.0776512	0.905783	0.990278	no significant	0.128835	0.112151	0.112021	0.124698	0.115068	0.095844
chr1_155408117_155429689_-	hsa_circASH1L_011	hsa_circ_0003247	844	ASH1L	exon-exon	-0.0816839	0.860441	0.990278	no significant	0.869633	0.485989	0.480091	0.831317	0.306848	0.575064
chr14_97299803_97327072_+	hsa_circVRK1_007	hsa_circ_0000566	1073	VRK1	exon-exon	-0.0830842	0.902822	0.990278	no significant	0.128835	0.168227	0.128024	0.249395	0	0.15974
chr6_86267693_86284096_-	hsa_circSNX14_011	hsa_circ_0001617	494	SNX14	exon-exon	-0.0847018	0.900332	0.990278	no significant	0.128835	0.0934594	0.128024	0.0415659	0.153424	0.127792
chr1_92327027_92329836_-	hsa_circTGFBR3_002	hsa_circ_0114454	2809	TGFBR3	exon-intergenic	-0.085107	0.902233	0.990278	no significant	0.161043	0.0560757	0.144027	0.124698	0.115068	0.095844
chr4_48371865_48385801_+	hsa_circSLAIN2_003	hsa_circ_0126525	971	SLAIN2	exon-exon	-0.0851762	0.870571	0.990278	no significant	0.322086	0.355146	0.16003	0.249395	0.306848	0.223636
chr1_200729966_200784772_+	hsa_circCAMSAP2_007	hsa_circ_0015839	506	CAMSAP2	exon-exon	-0.0923265	0.850202	0.990278	no significant	0.289878	0.242995	0.352067	0.166263	0.345204	0.31948
chr7_156619298_156629579_-	hsa_circLMBR1_004	hsa_circ_0005939	253	LMBR1	exon-exon	-0.0924843	0.894541	0.990278	no significant	0.161043	0.130843	0.0800151	0.207829	0.0767119	0.063896
chr15_44624185_44630515_+	hsa_circCASC4_007	hsa_circ_0000596	317	CASC4	exon-exon	-0.0928531	0.886265	0.990278	no significant	0.193252	0.205611	0.112021	0.166263	0.038356	0.255584
chr2_109388156_109389502_+	hsa_circRANBP2_018	hsa_circ_0006965	443	RANBP2	exon-exon	-0.095637	0.838919	0.990278	no significant	0.418712	0.261686	0.384073	0.249395	0.38356	0.351428
chr19_23541231_23545527_-	hsa_circZNF91_014	hsa_circ_0109315	4296	ZNF91	exon-exon	-0.095893	0.910019	0.990379	no significant	0.289878	0.0373838	0.192036	0.457225	0.038356	0
chr2_190656515_190682906_+	hsa_circPMS1_004	hsa_circ_0001083	602	PMS1	exon-exon	-0.0969707	0.833633	0.990278	no significant	0.354295	0.411222	0.336064	0.332527	0.460272	0.255584
chr10_27047990_27059274_-	hsa_circABI1_005	hsa_circ_0093401	601	ABI1	exon-exon	-0.10429	0.876844	0.990278	no significant	0.161043	0.130843	0.112021	0.0415659	0.230136	0.095844
chr20_60714130_60716000_-	hsa_circPSMA7_004	hsa_circ_0003456	375	PSMA7	exon-exon	-0.104631	0.880122	0.990278	no significant	0.22546	0.0747676	0.16003	0.166263	0.230136	0.031948
chr12_2929251_2930958_+	hsa_circITFG2_009	hsa_circ_0000374	542	ITFG2	exon-exon	-0.104766	0.877965	0.990278	no significant	0.0322086	0.205611	0.128024	0.0831317	0.153424	0.127792
chr8_141874410_141900868_-	hsa_circPTK2_020	hsa_circ_0002483	482	PTK2	exon-exon	-0.104853	0.801305	0.987141	no significant	1.09509	1.34582	0.68813	0.956015	1.03561	0.926492
chr1_32381495_32385259_-	hsa_circPTP4A2_004	hsa_circ_0007364	782	PTP4A2	exon-exon	-0.106063	0.800588	0.987141	no significant	1.19172	0.99067	0.752142	0.789752	0.690407	1.21402
chr2_85595808_85598685_+	hsa_circELMOD3_008	hsa_circ_0004726	408	ELMOD3	exon-exon	-0.106384	0.882894	0.990278	no significant	0.161043	0.0934594	0.0800151	0.124698	0.038356	0.127792
chr14_64465631_64489581_+	hsa_circSYNE2_025	hsa_circ_0102377	2284	SYNE2	exon-exon	-0.107729	0.880134	0.990278	no significant	0.193252	0.130843	0.336064	0.540356	0.115068	0
chr1_230798886_230810870_+	hsa_circCOG2_010	hsa_circ_0016868	726	COG2	exon-exon	-0.112424	0.867385	0.990278	no significant	0.0966259	0.112151	0.176033	0.0831317	0.230136	0.063896
chr2_227771508_227779067_+	hsa_circRHBDD1_008	hsa_circ_0058497	290	RHBDD1	exon-exon	-0.115157	0.856501	0.990278	no significant	0.161043	0.186919	0.128024	0.0415659	0.230136	0.15974
chr11_103173821_103229087_+	hsa_circDYNC2H1_057	hsa_circ_0024144	1061	DYNC2H1	exon-exon	-0.115806	0.858132	0.990278	no significant	0.0644173	0.168227	0.144027	0.124698	0.153424	0.095844
chr4_148860975_148887990_+	hsa_circARHGAP10_034	hsa_circ_0007265	488	ARHGAP10	exon-exon	-0.117327	0.879619	0.990278	no significant	0.128835	0.0560757	0.144027	0.249395	0.038356	0.031948
chr17_57430575_57430887_+	hsa_circYPEL2_002	hsa_circ_0005600	312	YPEL2	exon-exon	-0.118282	0.787915	0.987141	no significant	0.547547	0.504681	0.784148	0.70662	0.652051	0.383376
chr6_139264649_139265759_-	hsa_circREPS1_006	hsa_circ_0004368	352	REPS1	exon-exon	-0.119302	0.79637	0.987141	no significant	0.257669	0.373838	0.416079	0.374093	0.306848	0.31948
chr2_206992520_206994966_-	hsa_circNDUFS1_039	hsa_circ_0002431	331	NDUFS1	exon-exon	-0.119878	0.846576	0.990278	no significant	0.22546	0.112151	0.16003	0.166263	0.153424	0.127792
chr3_50004902_50012825_+	hsa_circRBM6_005	hsa_circ_0065769	1439	RBM6	exon-exon	-0.120012	0.852398	0.990278	no significant	0.161043	0.168227	0.176033	0	0.230136	0.223636
chr1_67423741_67428843_+	hsa_circMIER1_005	hsa_circ_0113954	433	MIER1	exon-exon	-0.123028	0.802552	0.987141	no significant	0.257669	0.336454	0.240045	0.249395	0.268492	0.255584
chr2_203329531_203332412_+	hsa_circBMPR2_003	hsa_circ_0003218	342	BMPR2	exon-exon	-0.12315	0.775493	0.986838	no significant	1.06288	0.710292	0.560106	0.665054	0.882187	0.575064
chr8_90734242_90737869_-	hsa_circ_chr8_00070	hsa_circ_0008587	3627	not_annotated	intergenic-intergenic	-0.124193	0.863337	0.990278	no significant	0	0.224303	0.272051	0.207829	0.268492	0.031948
chr15_44620882_44630515_+	hsa_circCASC4_005	hsa_circ_0035051	420	CASC4	exon-exon	-0.124841	0.850559	0.990278	no significant	0.0644173	0.149535	0.128024	0.124698	0.115068	0.095844
chr15_66044716_66053776_-	hsa_circDENND4A_003	hsa_circ_0035957	662	DENND4A	exon-exon	-0.125426	0.847483	0.990278	no significant	0.0644173	0.186919	0.128024	0.124698	0.115068	0.127792
chr15_72300166_72320134_-	hsa_circMYO9A_021	hsa_circ_0007266	445	MYO9A	exon-exon	-0.127207	0.850412	0.990278	no significant	0.193252	0.0747676	0.176033	0.0415659	0.153424	0.191688
chr1_117944807_117963271_+	hsa_circMAN1A2_008	hsa_circ_0000118	553	MAN1A2	exon-exon	-0.12765	0.756024	0.984418	no significant	2.67332	1.92526	1.96837	2.70178	1.18903	2.14052
chr6_107824860_107854814_+	hsa_circSOBP_004	hsa_circ_0130190	477	SOBP	exon-exon	-0.129905	0.832748	0.990278	no significant	0.128835	0.242995	0.144027	0.166263	0.230136	0.095844
chr1_205585605_205593019_-	hsa_circELK4_006	hsa_circ_0000175	4577	ELK4	exon-exon	-0.13008	0.748513	0.980865	no significant	0.901842	1.68227	1.23223	1.24698	1.15068	1.15013
chr2_191523883_191537878_+	hsa_circNAB1_009	hsa_circ_0002024	1024	NAB1	exon-exon	-0.131241	0.764616	0.984418	no significant	0.869633	1.14021	0.704133	1.24698	0.767119	0.511168
chr2_64083439_64085070_+	hsa_circUGP2_005	hsa_circ_0001020	236	UGP2	exon-exon	-0.133422	0.789549	0.987141	no significant	0.289878	0.39253	0.240045	0.166263	0.421916	0.255584
chr9_79130443_79180731_+	NA	NA		not_annotated	intergenic-intergenic	-0.1345	0.860523	0.990278	no significant	0.0322086	0.168227	0.128024	0	0.0767119	0.223636
chr11_108098321_108106561_+	hsa_circATM_005	hsa_circ_0003641	526	ATM	exon-exon	-0.136783	0.845675	0.990278	no significant	0.0644173	0.112151	0.128024	0.0415659	0.115068	0.127792
chr8_74585341_74601048_-	hsa_circSTAU2_011	hsa_circ_0001811	296	STAU2	exon-exon	-0.13792	0.83143	0.990278	no significant	0.128835	0.149535	0.128024	0.207829	0.115068	0.063896
chr7_42063066_42088295_-	hsa_circGLI3_009	hsa_circ_0079948	1024	GLI3	exon-exon	-0.138183	0.826008	0.989858	no significant	0.193252	0.168227	0.128024	0.0831317	0.115068	0.223636
chr10_5836847_5842668_-	hsa_circGDI2_006	hsa_circ_0002665	343	GDI2	exon-exon	-0.138217	0.796451	0.987141	no significant	0.322086	0.149535	0.304058	0.207829	0.230136	0.255584
chr14_71492833_71502874_+	hsa_circPCNX_074	hsa_circ_0007996	684	PCNX	exon-exon	-0.138543	0.861082	0.990278	no significant	0.128835	0.112151	0.0800151	0.0415659	0	0.223636
chr12_6657590_6657991_-	hsa_circIFFO1_001	hsa_circ_0000375	279	IFFO1	exon-exon	-0.140395	0.863557	0.990278	no significant	0.128835	0.0186919	0.144027	0.0831317	0.153424	0.031948
chr19_52785363_52786666_+	hsa_circZNF766_002	hsa_circ_0052095	256	ZNF766	exon-exon	-0.140579	0.809147	0.987141	no significant	0.193252	0.149535	0.224042	0.207829	0.19178	0.127792
chr4_153332454_153333681_-	hsa_circFBXW7_009	hsa_circ_0001451	1227	FBXW7	exon-exon	-0.14209	0.718604	0.977849	no significant	1.51381	1.30843	1.15222	1.45481	1.11232	1.05428
chr6_132203484_132207864_+	hsa_circENPP1_011	hsa_circ_0130714	507	ENPP1	exon-exon	-0.143896	0.835069	0.990278	no significant	0.257669	0.186919	0.0640121	0.0415659	0.19178	0.191688
chr3_171965322_171969331_+	hsa_circFNDC3B_029	hsa_circ_0006156	526	FNDC3B	exon-exon	-0.144682	0.708781	0.976047	no significant	4.34817	3.19631	4.64088	2.82648	3.64382	4.60051
chr3_123649948_123667979_-	hsa_circCCDC14_004	hsa_circ_0121678	1426	CCDC14	exon-exon	-0.145194	0.852205	0.990278	no significant	0.22546	0.130843	0.112021	0	0.38356	0.031948
chr18_9524591_9525849_+	hsa_circRALBP1_007	hsa_circ_0005158	294	RALBP1	exon-exon	-0.145296	0.78432	0.987141	no significant	0.193252	0.448605	0.352067	0.0831317	0.306848	0.511168
chr5_153413350_153414527_-	hsa_circFAM114A2_003	hsa_circ_0001546	417	FAM114A2	exon-exon	-0.145382	0.76187	0.984418	no significant	0.611964	1.81311	2.20842	0.748186	1.68766	1.82104
chr1_59787207_59844509_+	hsa_circFGGY_007	hsa_circ_0005354	568	FGGY	exon-exon	-0.148074	0.774095	0.986838	no significant	0.161043	0.355146	0.272051	0.249395	0.306848	0.191688
chr16_4382215_4383520_+	hsa_circGLIS2_002	hsa_circ_0005692	411	GLIS2	intergenic-exon	-0.149673	0.766762	0.984418	no significant	0.22546	0.429913	0.352067	0.207829	0.19178	0.511168
chr1_35824525_35827390_+	hsa_circZMYM4_006	hsa_circ_0011536	755	ZMYM4	exon-exon	-0.149747	0.736799	0.980865	no significant	0.740799	0.542065	0.912173	0.914449	0.728763	0.383376
chr15_65471271_65472542_-	hsa_circCLPX_002	hsa_circ_0004374	279	CLPX	exon-exon	-0.149831	0.81616	0.987141	no significant	0.289878	0.168227	0.112021	0.249395	0.19178	0.063896
chr1_114391161_114397671_-	hsa_circPTPN22_002	hsa_circ_0000111	375	PTPN22	exon-exon	-0.151304	0.813929	0.987141	no significant	0.0966259	0.112151	0.256048	0.124698	0.19178	0.127792
chr3_145820541_145842016_-	hsa_circPLOD2_002	hsa_circ_0067682	668	PLOD2	exon-exon	-0.152699	0.765228	0.984418	no significant	0.676381	0.728984	0.592112	0.0831317	0.728763	0.95844
chr12_129293332_129299615_-	hsa_circSLC15A4_004	hsa_circ_0006689	712	SLC15A4	exon-exon	-0.153987	0.814218	0.987141	no significant	0.193252	0.130843	0.176033	0.0831317	0.306848	0.063896
chr14_91947919_91952074_-	hsa_circSMEK1_005	hsa_circ_0003045	717	SMEK1	exon-exon	-0.154492	0.794217	0.987141	no significant	0.0966259	0.280378	0.208039	0.124698	0.268492	0.15974
chr1_14057494_14075982_+	hsa_circPRDM2_006	hsa_circ_0004861	502	PRDM2	exon-exon	-0.154795	0.812499	0.987141	no significant	0.289878	0.0934594	0.144027	0.166263	0.19178	0.095844
chr17_64023618_64026141_-	hsa_circCEP112_021	hsa_circ_0107487	438	CEP112	exon-exon	-0.155002	0.80406	0.987141	no significant	0.0966259	0.149535	0.224042	0.166263	0.19178	0.095844
chr5_172535626_172550205_+	hsa_circCREBRF_005	hsa_circ_0128618	588	CREBRF	exon-exon	-0.155396	0.816002	0.987141	no significant	0.128835	0.149535	0.0960182	0.124698	0.153424	0.063896
chr3_107429298_107435696_+	hsa_circBBX_007	hsa_circ_0001324	414	BBX	exon-exon	-0.156076	0.782843	0.987141	no significant	0.128835	0.317762	0.224042	0.290961	0.115068	0.223636
chr12_121220457_121222396_-	hsa_circSPPL3_006	hsa_circ_0003472	312	SPPL3	exon-exon	-0.157438	0.750713	0.980865	no significant	0.257669	0.635524	0.320061	0.540356	0.268492	0.31948
chr9_136277418_136278041_-	hsa_circREXO4_003	hsa_circ_0089371	338	REXO4	exon-exon	-0.157629	0.810539	0.987141	no significant	0.128835	0.242995	0.112021	0.207829	0.038356	0.191688
chr22_51123012_51160865_+	NA	NA		SHANK3	exon-exon	-0.157883	0.840093	0.990278	no significant	0.0322086	0.112151	0.128024	0.124698	0.153424	0
chr1_155823066_155823597_-	hsa_circGON4L_002	hsa_circ_0000139	531	GON4L	exon-exon	-0.158023	0.702908	0.973465	no significant	1.67485	1.23366	0.864164	1.08071	0.958899	1.30987
chr2_136432901_136437894_+	hsa_circR3HDM1_048	hsa_circ_0001070	307	R3HDM1	exon-exon	-0.161466	0.815673	0.987141	no significant	0.128835	0.112151	0.0960182	0.0831317	0.153424	0.063896
chr20_30904020_30904677_+	hsa_circKIF3B_005	hsa_circ_0002302	344	KIF3B	exon-exon	-0.163225	0.784881	0.987141	no significant	0.0966259	0.205611	0.240045	0.166263	0.115068	0.223636
chr6_131466424_131490413_+	hsa_circAKAP7_002	hsa_circ_0130687	570	AKAP7	exon-exon	-0.163502	0.798011	0.987141	no significant	0.322086	0.186919	0.0960182	0.0831317	0.19178	0.223636
chr11_128628009_128651918_+	hsa_circFLI1_003	hsa_circ_0000370	637	FLI1	exon-exon	-0.1648	0.825577	0.989858	no significant	0.0322086	0.168227	0.112021	0.207829	0.038356	0.063896
chr5_122881110_122893258_+	hsa_circCSNK1G3_004	hsa_circ_0001522	536	CSNK1G3	exon-exon	-0.164996	0.660509	0.956604	no significant	2.15798	2.78509	2.49647	2.24456	2.45478	2.01272
chr9_37126308_37127260_+	hsa_circZCCHC7_007	hsa_circ_0138744	952	ZCCHC7	exon-intergenic	-0.167664	0.789722	0.987141	no significant	0.0966259	0.261686	0.16003	0.249395	0.0767119	0.15974
chr6_125366356_125379252_+	hsa_circRNF217_006	hsa_circ_0008536	399	RNF217	exon-exon	-0.167687	0.818846	0.989175	no significant	0.0966259	0.168227	0.0640121	0.124698	0.038356	0.127792
chr7_104714065_104717880_+	hsa_circMLL5_031	hsa_circ_0001736	633	KMT2E	exon-exon	-0.168628	0.789173	0.987141	no significant	0.289878	0.224303	0.176033	0.166263	0.421916	0.031948
chr12_27867712_27877119_+	hsa_circMRPS35_002	hsa_circ_0000384	410	MRPS35	exon-exon	-0.172834	0.72668	0.979305	no significant	0.322086	0.280378	0.36807	0.124698	0.306848	0.415324
chr7_102665509_102669865_-	hsa_circFBXL13_005	hsa_circ_0007375	495	FBXL13	exon-exon	-0.17716	0.796288	0.987141	no significant	0.0322086	0.149535	0.16003	0.0831317	0.115068	0.127792
chr1_27056141_27059283_+	hsa_circARID1A_002	hsa_circ_0008494	783	ARID1A	exon-exon	-0.179379	0.718339	0.977849	no significant	0.644173	0.280378	0.384073	0.457225	0.498628	0.191688
chr3_138289159_138291826_-	hsa_circCEP70_005	hsa_circ_0003823	522	CEP70	exon-intergenic	-0.179509	0.768336	0.985218	no significant	0.128835	0.242995	0.16003	0.249395	0.115068	0.127792
chr8_116599227_116635985_-	hsa_circTRPS1_003	hsa_circ_0085362	2821	TRPS1	exon-exon	-0.181586	0.761407	0.984418	no significant	1.32055	1.49535	0.736139	0.0415659	2.03287	1.05428
chr9_33953282_33963789_-	hsa_circUBAP2_057	hsa_circ_0001847	377	UBAP2	exon-exon	-0.183878	0.719472	0.977849	no significant	0.418712	0.59814	0.384073	0.290961	0.153424	0.766752
chr6_163876310_163899928_+	hsa_circQKI_005	hsa_circ_0005328	260	QKI	exon-exon	-0.186978	0.748448	0.980865	no significant	0.257669	0.168227	0.176033	0.207829	0.115068	0.191688
chr10_43650344_43654379_+	hsa_circCSGALNACT2_001	hsa_circ_0000236	1131	CSGALNACT2	exon-exon	-0.187874	0.770366	0.985664	no significant	0.289878	0.149535	0.128024	0.0415659	0.230136	0.191688
chr3_145838898_145842016_-	hsa_circPLOD2_001	hsa_circ_0122319	229	PLOD2	exon-exon	-0.191215	0.69194	0.96789	no significant	3.15645	3.19631	2.30444	0.831317	2.18629	4.53662
chr4_128590190_128609022_+	hsa_circINTU_010	hsa_circ_0003390	477	INTU	exon-exon	-0.193239	0.747206	0.980865	no significant	0.161043	0.317762	0.416079	0.0415659	0.613695	0.15974
chr5_72370568_72373320_+	hsa_circFCHO2_044	hsa_circ_0002490	268	FCHO2	exon-exon	-0.194782	0.662767	0.956604	no significant	0.805216	0.654216	0.448085	0.748186	0.536983	0.383376
chr16_53907697_53922863_+	hsa_circFTO_015	hsa_circ_0005941	344	FTO	exon-exon	-0.198073	0.691593	0.96789	no significant	1.06288	0.785059	0.560106	0.49879	0.268492	1.27792
chr22_43435785_43442579_-	hsa_circTTLL1_014	hsa_circ_0116692	290	TTLL1	exon-exon	-0.199979	0.729163	0.979305	no significant	0.322086	0.149535	0.192036	0.207829	0.19178	0.15974
chr19_8520288_8528570_+	hsa_circHNRNPM_001	hsa_circ_0006382	325	HNRNPM	exon-exon	-0.201103	0.770323	0.985664	no significant	0.257669	0.149535	0.0800151	0.0831317	0.0767119	0.223636
chr1_65095037_65107652_+	hsa_circCACHD1_010	hsa_circ_0113889	639	CACHD1	exon-exon	-0.204221	0.779513	0.987141	no significant	0.193252	0.112151	0.0640121	0.166263	0.0767119	0.063896
chr17_40650941_40653322_+	hsa_circATP6V0A1_031	hsa_circ_0043837	444	ATP6V0A1	exon-exon	-0.205813	0.761116	0.984418	no significant	0.0644173	0.205611	0.128024	0.0831317	0.0767119	0.191688
chr7_27668989_27689252_-	hsa_circHIBADH_002	hsa_circ_0006773	393	HIBADH	exon-exon	-0.206954	0.710383	0.976047	no significant	0.161043	0.280378	0.224042	0.207829	0.268492	0.127792
chr2_61749745_61753656_-	hsa_circXPO1_021	hsa_circ_0001016	175	XPO1	exon-exon	-0.215564	0.678825	0.960875	no significant	0.48313	0.280378	0.224042	0.249395	0.421916	0.15974
chr18_9583114_9595100_-	hsa_circPPP4R1_023	hsa_circ_0009022	815	PPP4R1	exon-exon	-0.215816	0.649896	0.950909	no significant	0.48313	0.616832	0.336064	0.49879	0.536983	0.223636
chr12_105385489_105389804_+	hsa_circC12orf45_001	hsa_circ_0009063	1686	C12orf45	exon-intergenic	-0.216746	0.80228	0.987141	no significant	0.128835	0.168227	0.016003	0.166263	0	0.095844
chr3_179131199_179144030_-	hsa_circGNB4_003	hsa_circ_0005009	741	GNB4	exon-exon	-0.218637	0.777859	0.987141	no significant	0.0322086	0.0934594	0.224042	0.124698	0	0.191688
chr9_5968018_5988545_-	hsa_circKIAA2026_001	hsa_circ_0138872	1619	KIAA2026	exon-exon	-0.219996	0.624748	0.945038	no significant	0.740799	0.59814	0.672127	0.623488	0.843831	0.287532
chr1_145592632_145595220_-	hsa_circPOLR3C_018	hsa_circ_0007755	441	POLR3C	exon-exon	-0.221138	0.720037	0.977849	no significant	0.22546	0.130843	0.208039	0.0831317	0.268492	0.127792
chr3_119219541_119236162_+	hsa_circTIMMDC1_006	hsa_circ_0066874	513	TIMMDC1	exon-exon	-0.221245	0.759822	0.984418	no significant	0.0644173	0.130843	0.128024	0	0.153424	0.127792
chr10_86198267_86237420_+	hsa_circFAM190B_016	hsa_circ_0018998	457	CCSER2	exon-exon	-0.221514	0.667135	0.960544	no significant	0.322086	0.261686	0.336064	0.124698	0.19178	0.447272
chr1_225140371_225195246_+	hsa_circDNAH14_003	hsa_circ_0016601	1140	DNAH14	exon-exon	-0.222164	0.743607	0.980865	no significant	0.322086	0.168227	0.0640121	0.124698	0.153424	0.15974
chr14_61262934_61285565_+	hsa_circMNAT1_006	hsa_circ_0032116	598	MNAT1	exon-exon	-0.224313	0.740827	0.980865	no significant	0.0966259	0.205611	0.112021	0.124698	0.038356	0.191688
chrX_41519691_41530783_-	hsa_circCASK_008	hsa_circ_0001917	402	CASK	exon-exon	-0.225138	0.759889	0.984418	no significant	0.0644173	0.112151	0.112021	0.0415659	0.153424	0.063896
chr8_37623043_37623873_+	hsa_circPROSC_002	hsa_circ_0001788	220	PROSC	exon-exon	-0.226016	0.695848	0.968891	no significant	0.418712	0.186919	0.208039	0.374093	0.0767119	0.223636
chr7_24659670_24708279_+	hsa_circMPP6_007	hsa_circ_0133989	1285	MPP6	exon-exon	-0.226748	0.684561	0.965469	no significant	0.386504	0.261686	0.320061	0	0.345204	0.447272
chr10_15858833_15889942_-	hsa_circFAM188A_007	hsa_circ_0000219	788	FAM188A	exon-exon	-0.2279	0.619377	0.943773	no significant	0.418712	0.448605	0.576109	0.581922	0.230136	0.447272
chr1_52981562_52992045_-	hsa_circZCCHC11_008	hsa_circ_0012553	975	ZCCHC11	exon-exon	-0.231894	0.73364	0.979305	no significant	0.354295	0.149535	0.112021	0.290961	0.19178	0.031948
chr5_32135677_32143986_-	hsa_circGOLPH3_005	hsa_circ_0001470	247	GOLPH3	exon-exon	-0.234225	0.732169	0.979305	no significant	0.0966259	0.149535	0.128024	0.0831317	0.038356	0.191688
chr21_37711076_37717005_+	hsa_circMORC3_020	hsa_circ_0001189	420	MORC3	exon-exon	-0.235148	0.637237	0.949862	no significant	0.48313	0.672908	0.832157	1.12228	0.38356	0.255584
chr16_68155889_68157024_+	hsa_circNFATC3_003	hsa_circ_0005615	1135	NFATC3	exon-exon	-0.235326	0.573279	0.920387	no significant	0.805216	0.747676	0.944179	0.914449	0.498628	0.734804
chr13_33091993_33101669_-	hsa_circN4BP2L2_008	hsa_circ_0000471	388	N4BP2L2	exon-exon	-0.235511	0.532049	0.908488	no significant	2.51227	3.47669	3.02457	2.32769	2.91505	2.49194
chr9_86294689_86301070_-	hsa_circUBQLN1_003	hsa_circ_0008207	531	UBQLN1	exon-exon	-0.238364	0.630941	0.946536	no significant	0.354295	0.261686	0.304058	0.166263	0.38356	0.223636
chr3_196214269_196215554_-	hsa_circRNF168_001	hsa_circ_0123217	257	RNF168	exon-exon	-0.238894	0.725415	0.979305	no significant	0.354295	0.149535	0.0960182	0.207829	0.038356	0.223636
chr7_152007050_152012423_-	hsa_circMLL3_013	hsa_circ_0001769	460	KMT2C	exon-exon	-0.239939	0.616283	0.942968	no significant	0.322086	0.485989	0.36807	0.249395	0.230136	0.511168
chr7_24663284_24720139_+	hsa_circMPP6_025	hsa_circ_0001687	1448	MPP6	exon-exon	-0.242239	0.66919	0.960875	no significant	0.386504	0.224303	0.240045	0.0831317	0.460272	0.15974
chr12_116668337_116675510_-	hsa_circMED13L_009	hsa_circ_0000443	7173	MED13L	intergenic-exon	-0.246751	0.544703	0.910982	no significant	1.41718	1.08413	1.08821	0.789752	1.34246	0.894544
chr16_11940357_11941663_-	hsa_circRSL1D1_004	hsa_circ_0006979	390	RSL1D1	exon-exon	-0.250407	0.675435	0.960875	no significant	0.128835	0.261686	0.288055	0.124698	0.38356	0.095844
chr3_138289159_138290198_-	hsa_circCEP70_013	hsa_circ_0002468	396	CEP70	exon-exon	-0.251298	0.600576	0.933679	no significant	0.354295	0.39253	0.768145	0.457225	0.268492	0.575064
chr1_224377278_224378021_+	hsa_circDEGS1_001	hsa_circ_0112127	743	DEGS1	exon-exon	-0.255696	0.731646	0.979305	no significant	0.22546	0.0934594	0.0640121	0.0415659	0.115068	0.127792
chr4_129913321_129925031_-	hsa_circSCLT1_010	hsa_circ_0001439	396	SCLT1	exon-exon	-0.259342	0.553123	0.910982	no significant	0.676381	1.00936	1.02419	1.12228	0.767119	0.447272
chr11_57258696_57259335_-	hsa_circSLC43A1_013	hsa_circ_0005204	322	SLC43A1	exon-exon	-0.262298	0.67705	0.960875	no significant	0.0644173	0.205611	0.272051	0.166263	0.230136	0.095844
chr5_95091099_95099324_+	hsa_circRHOBTB3_020	hsa_circ_0007444	479	RHOBTB3	exon-exon	-0.263949	0.516229	0.908488	no significant	4.0905	2.80378	2.89655	1.7042	2.76163	3.67402
chr2_61343113_61345251_+	hsa_circKIAA1841_043	hsa_circ_0007793	284	KIAA1841	exon-exon	-0.264454	0.700076	0.970993	no significant	0.0644173	0.336454	0.112021	0.124698	0.230136	0.095844
chr15_63824845_63855207_+	hsa_circUSP3_016	hsa_circ_0002138	670	USP3	exon-exon	-0.26701	0.696907	0.968891	no significant	0.193252	0.130843	0.128024	0	0.230136	0.127792
chr20_18278628_18287037_+	hsa_circZNF133_005	hsa_circ_0006099	648	ZNF133	exon-exon	-0.270736	0.653434	0.952519	no significant	0.0966259	0.242995	0.256048	0.166263	0.268492	0.095844
chr19_21216261_21216990_+	hsa_circZNF430_005	hsa_circ_0008838	226	ZNF430	exon-exon	-0.271134	0.738539	0.980865	no significant	0	0.130843	0.112021	0.124698	0.0767119	0.031948
chr3_15452751_15457449_-	hsa_circMETTL6_007	hsa_circ_0122464	506	METTL6	exon-exon	-0.273753	0.652271	0.952007	no significant	0.322086	0.168227	0.208039	0.166263	0.345204	0.063896
chr2_203817281_203820481_+	hsa_circALS2CR8_012	hsa_circ_0004919	336	CARF	exon-exon	-0.274627	0.626219	0.945038	no significant	0.0966259	0.280378	0.336064	0.166263	0.268492	0.191688
chr1_42730785_42744343_-	hsa_circFOXJ3_012	hsa_circ_0006848	400	FOXJ3	exon-exon	-0.275001	0.643296	0.950591	no significant	0.289878	0.224303	0.176033	0.124698	0.345204	0.095844
chr14_55168779_55169298_+	hsa_circSAMD4A_005	hsa_circ_0004846	519	SAMD4A	exon-exon	-0.276735	0.57884	0.92644	no significant	1.09509	1.23366	1.13621	0.374093	0.536983	1.91688
chr22_41277773_41278181_+	hsa_circXPNPEP3_005	hsa_circ_0008360	408	XPNPEP3	exon-exon	-0.277295	0.684202	0.965469	no significant	0.0966259	0.0934594	0.240045	0.166263	0.153424	0.063896
chr5_122881110_122911657_+	hsa_circCSNK1G3_006	hsa_circ_0073706	920	CSNK1G3	exon-exon	-0.282596	0.556844	0.910982	no significant	0.418712	0.411222	0.288055	0.166263	0.345204	0.383376
chr2_122514815_122519100_+	hsa_circTSN_003	hsa_circ_0002847	307	TSN	exon-exon	-0.284972	0.655861	0.954868	no significant	0.161043	0.149535	0.144027	0.124698	0.19178	0.063896
chr10_112356155_112358048_+	hsa_circSMC3_016	hsa_circ_0000260	305	SMC3	exon-exon	-0.288256	0.677438	0.960875	no significant	0.0644173	0.112151	0.16003	0.0831317	0.0767119	0.127792
chr16_72991325_72994093_-	hsa_circZFHX3_007	hsa_circ_0007963	2768	ZFHX3	exon-exon	-0.288949	0.671629	0.960875	no significant	0.128835	0.0747676	0.192036	0.0831317	0.115068	0.127792
chr15_30766558_30805901_+	NA	NA		not_annotated	intergenic-intergenic	-0.292843	0.726832	0.979305	no significant	0.322086	0.0186919	0.16003	0.0831317	0	0.287532
chr7_158552176_158557544_-	hsa_circESYT2_032	hsa_circ_0001776	495	ESYT2	exon-exon	-0.293585	0.468104	0.885619	no significant	2.19019	4.5982	4.01676	3.61623	2.64656	2.68363
chr7_121753171_121773795_-	hsa_circAASS_005	hsa_circ_0006919	1293	AASS	exon-exon	-0.301081	0.626531	0.945038	no significant	0.0966259	0.224303	0.240045	0.0831317	0.268492	0.127792
chr3_111632165_111639266_+	hsa_circPHLDB2_004	hsa_circ_0001326	666	PHLDB2	exon-exon	-0.302405	0.522673	0.908488	no significant	0.322086	0.542065	0.400076	0.49879	0.345204	0.223636
chr22_29240114_29242500_+	hsa_circCTA-292E10.6_001	hsa_circ_0116393	2386	not_annotated	intergenic-intergenic	-0.307492	0.69371	0.96789	no significant	0.0322086	0.112151	0.112021	0.124698	0.0767119	0.031948
chr5_38510565_38530768_-	hsa_circLIFR_004	hsa_circ_0129046	1010	LIFR	exon-exon	-0.307492	0.69371	0.96789	no significant	0.0322086	0.112151	0.112021	0.124698	0.0767119	0.031948
chr6_35586872_35610620_-	hsa_circFKBP5_004	hsa_circ_0001599	527	FKBP5	exon-exon	-0.308824	0.741555	0.980865	no significant	0.128835	0	0.112021	0.124698	0	0.063896
chr19_47767859_47768203_+	hsa_circCCDC9_003	hsa_circ_0000944	258	CCDC9	exon-exon	-0.31159	0.617917	0.942968	no significant	0.161043	0.261686	0.128024	0.207829	0.153424	0.095844
chr5_38991050_39021238_-	hsa_circRICTOR_006	hsa_circ_0006308	486	RICTOR	exon-exon	-0.312098	0.617441	0.942968	no significant	0.128835	0.149535	0.208039	0.166263	0.0767119	0.15974
chr1_51868106_51874004_-	hsa_circEPS15_037	hsa_circ_0005567	607	EPS15	exon-exon	-0.312958	0.551608	0.910982	no significant	0.450921	0.355146	0.208039	0.124698	0.230136	0.415324
chr9_19356969_19358158_+	hsa_circDENND4C_053	hsa_circ_0006556	379	DENND4C	exon-exon	-0.315609	0.692441	0.96789	no significant	0.0322086	0.112151	0.16003	0.0831317	0.19178	0
chr11_85723323_85742653_-	hsa_circPICALM_016	hsa_circ_0023940	528	PICALM	exon-exon	-0.316873	0.637991	0.949862	no significant	0.161043	0.112151	0.176033	0.0415659	0.0767119	0.223636
chr1_108690900_108703915_-	hsa_circSLC25A24_007	hsa_circ_0004270	532	SLC25A24	exon-exon	-0.319315	0.495579	0.90243	no significant	0.70859	0.560757	0.320061	0.457225	0.306848	0.47922
chr4_73950965_73958017_-	hsa_circANKRD17_047	hsa_circ_0001417	1832	ANKRD17	exon-exon	-0.320109	0.529346	0.908488	no significant	0.289878	0.504681	0.304058	0.249395	0.498628	0.15974
chr1_28785595_28793046_+	hsa_circPHACTR4_007	hsa_circ_0005406	574	PHACTR4	exon-exon	-0.323952	0.553276	0.910982	no significant	0.161043	0.29907	0.304058	0.332527	0.19178	0.127792
chr4_40936472_40947087_-	hsa_circAPBB2_019	hsa_circ_0008453	416	APBB2	exon-exon	-0.324423	0.57942	0.92644	no significant	0.386504	0.205611	0.176033	0.0831317	0.306848	0.191688
chr8_38205014_38205733_-	hsa_circWHSC1L1_001	hsa_circ_0083996	719	WHSC1L1	exon-exon	-0.324936	0.677988	0.960875	no significant	0.193252	0.0373838	0.112021	0.0415659	0.0767119	0.127792
chr15_59204761_59205895_-	hsa_circSLTM_009	hsa_circ_0003713	246	SLTM	exon-exon	-0.327986	0.642865	0.950591	no significant	0.257669	0.130843	0.0960182	0	0.19178	0.15974
chr1_35846859_35854683_+	hsa_circZMYM4_017	hsa_circ_0000051	1255	ZMYM4	exon-exon	-0.329725	0.593626	0.932132	no significant	0.289878	0.149535	0.144027	0.124698	0.153424	0.15974
chr5_43295853_43297268_-	hsa_circHMGCS1_013	hsa_circ_0072391	331	HMGCS1	exon-exon	-0.331143	0.62583	0.945038	no significant	0.0966259	0.186919	0.128024	0.166263	0.153424	0.031948
chr1_155646338_155649303_-	hsa_circYY1AP1_008	hsa_circ_0014606	459	YY1AP1	exon-exon	-0.332516	0.439004	0.864726	no significant	0.869633	1.27105	1.0402	0.623488	1.3041	0.63896
chr5_145176004_145205763_-	hsa_circPRELID2_002	hsa_circ_0008647	602	PRELID2	exon-exon	-0.33519	0.615628	0.942968	no significant	0.193252	0.205611	0.0800151	0.0831317	0.153424	0.127792
chr17_40879652_40882936_-	hsa_circEZH1_005	hsa_circ_0043898	348	EZH1	exon-exon	-0.336686	0.621629	0.943773	no significant	0.386504	0.112151	0.144027	0.0415659	0.306848	0.127792
chr21_38792600_38845182_+	hsa_circDYRK1A_011	hsa_circ_0005955	283	DYRK1A	exon-exon	-0.341288	0.581545	0.927306	no significant	0.193252	0.168227	0.288055	0.124698	0.345204	0.063896
chr9_33960823_33973235_-	hsa_circUBAP2_044	hsa_circ_0001850	278	UBAP2	exon-exon	-0.341889	0.622472	0.943773	no significant	0.128835	0.168227	0.0800151	0.0831317	0.0767119	0.127792
chr6_108225832_108246136_-	hsa_circSEC63_016	hsa_circ_0009144	830	SEC63	exon-exon	-0.345004	0.642366	0.950591	no significant	0.128835	0.130843	0.144027	0.0415659	0	0.255584
chr4_3088665_3109150_+	hsa_circHTT_004	hsa_circ_0001392	484	HTT	exon-exon	-0.345633	0.456509	0.877095	no significant	0.386504	0.542065	0.5281	0.457225	0.19178	0.511168
chr3_56626997_56628056_+	hsa_circCCDC66_015	hsa_circ_0001313	468	CCDC66	exon-exon	-0.346522	0.431682	0.862098	no significant	0.386504	0.803751	0.768145	0.540356	0.536983	0.511168
chr1_8716031_8716500_-	hsa_circRERE_004	hsa_circ_0114356	469	RERE	exon-exon	-0.348418	0.613013	0.942968	no significant	0.161043	0.168227	0.0960182	0.0831317	0.038356	0.191688
chr8_48308935_48320523_+	hsa_circKIAA0146_012	hsa_circ_0001798	352	SPIDR	exon-exon	-0.349905	0.46785	0.885619	no significant	0.515338	0.560757	1.0402	0.623488	0.843831	0.255584
chr13_41133645_41134997_-	hsa_circFOXO1_002	hsa_circ_0030042	1352	FOXO1	exon-exon	-0.350173	0.638298	0.949862	no significant	0.128835	0.149535	0.0640121	0.124698	0.115068	0.031948
chr12_123983090_123984083_-	hsa_circRILPL1_002	hsa_circ_0007552	341	RILPL1	exon-exon	-0.350361	0.510799	0.908488	no significant	0.257669	0.29907	0.304058	0.0831317	0.19178	0.383376
chr11_3752620_3774638_-	hsa_circNUP98_055	hsa_circ_0000274	556	NUP98	exon-exon	-0.350858	0.672227	0.960875	no significant	0	0.29907	0.0960182	0.166263	0	0.15974
chr12_70671911_70704797_+	hsa_circCNOT2_005	hsa_circ_0007127	490	CNOT2	exon-exon	-0.352012	0.649461	0.950909	no significant	0.0322086	0.149535	0.128024	0.0415659	0.19178	0.031948
chr4_39915230_39927553_-	hsa_circPDS5A_013	hsa_circ_0007308	563	PDS5A	exon-exon	-0.353301	0.594049	0.932132	no significant	0.257669	0.149535	0.16003	0	0.153424	0.255584
chr2_26486247_26500028_+	hsa_circHADHB_004	hsa_circ_0008257	333	HADHB	exon-exon	-0.354013	0.584895	0.927601	no significant	0.128835	0.149535	0.176033	0.0415659	0.115068	0.191688
chr4_140058783_140060651_-	hsa_circELF2_004	hsa_circ_0007466	323	ELF2	exon-intergenic	-0.356004	0.61325	0.942968	no significant	0.193252	0.130843	0.0800151	0.166263	0.0767119	0.063896
chr20_33057852_33080402_+	hsa_circITCH_053	hsa_circ_0059957	992	ITCH	exon-exon	-0.357491	0.553767	0.910982	no significant	0.257669	0.149535	0.176033	0.124698	0.153424	0.15974
chr20_34317233_34320057_-	hsa_circRBM39_010	hsa_circ_0008817	315	RBM39	exon-exon	-0.359074	0.590597	0.932132	no significant	0.289878	0.149535	0.112021	0.207829	0.038356	0.15974
chr12_89860546_89866052_-	hsa_circPOC1B_007	hsa_circ_0027702	580	POC1B	exon-exon	-0.362922	0.673094	0.960875	no significant	0.0966259	0	0.464088	0.124698	0.306848	0.031948
chr7_23015828_23030758_-	hsa_circFAM126A_004	hsa_circ_0005251	654	FAM126A	exon-exon	-0.364347	0.499975	0.902883	no significant	0.354295	0.317762	0.288055	0.457225	0.038356	0.255584
chr2_72692288_72707879_-	hsa_circEXOC6B_049	hsa_circ_0120921	315	EXOC6B	exon-exon	-0.365058	0.596554	0.932132	no significant	0.257669	0.186919	0.0640121	0.166263	0.115068	0.095844
chr11_77330650_77336863_-	hsa_circCLNS1A_012	hsa_circ_0023694	474	CLNS1A	exon-exon	-0.367673	0.501974	0.904737	no significant	0.450921	0.168227	0.304058	0.249395	0.115068	0.31948
chr9_86292641_86293514_-	hsa_circUBQLN1_018	hsa_circ_0001865	394	UBQLN1	exon-exon	-0.368792	0.584546	0.927601	no significant	0.322086	0.112151	0.128024	0.0831317	0.230136	0.095844
chr1_117944807_117948267_+	hsa_circMAN1A2_006	hsa_circ_0000116	353	MAN1A2	exon-exon	-0.371565	0.480646	0.897002	no significant	0.450921	0.336454	0.256048	0.49879	0.153424	0.15974
chr12_23998916_24048958_-	hsa_circSOX5_014	hsa_circ_0098181	443	SOX5	exon-exon	-0.372542	0.595619	0.932132	no significant	0.0644173	0.355146	0.128024	0.0415659	0.268492	0.127792
chr2_172782046_172809519_+	hsa_circHAT1_002	hsa_circ_0008032	302	HAT1	exon-exon	-0.373272	0.641141	0.950591	no significant	0.193252	0.0560757	0.112021	0.0831317	0.19178	0
chr3_138289159_138291774_-	hsa_circCEP70_008	hsa_circ_0004524	470	CEP70	exon-exon	-0.373928	0.423885	0.862098	no significant	0.418712	0.373838	0.576109	0.49879	0.230136	0.351428
chr18_21644103_21663045_+	hsa_circTTC39C_006	hsa_circ_0047270	817	TTC39C	exon-exon	-0.374605	0.469779	0.885619	no significant	0.386504	0.205611	0.288055	0.207829	0.230136	0.223636
chr1_172520651_172560211_+	hsa_circC1orf9_005	hsa_circ_0015261	2851	SUCO	exon-exon	-0.376267	0.567895	0.91442	no significant	0.161043	0.0934594	0.176033	0.0831317	0.115068	0.127792
chr14_93760203_93762503_-	hsa_circBTBD7_003	hsa_circ_0000563	1268	BTBD7	exon-exon	-0.377423	0.592489	0.932132	no significant	0.0644173	0.168227	0.128024	0.0831317	0.038356	0.15974
chr13_26974589_26975761_+	hsa_circCDK8_008	hsa_circ_0003489	336	CDK8	exon-exon	-0.378252	0.506322	0.908127	no significant	0.22546	0.29907	0.224042	0.0415659	0.268492	0.255584
chr6_87925620_87928449_+	hsa_circZNF292_006	hsa_circ_0004058	370	ZNF292	exon-exon	-0.378433	0.398853	0.862098	no significant	0.837425	0.934594	1.15222	0.457225	0.536983	1.24597
chr15_67524151_67529158_-	hsa_circAAGAB_003	hsa_circ_0000620	462	AAGAB	exon-exon	-0.378523	0.549941	0.910982	no significant	0.22546	0.168227	0.144027	0.0415659	0.19178	0.15974
chrX_76907603_76912143_-	hsa_circATRX_022	hsa_circ_0001932	437	ATRX	exon-exon	-0.378919	0.616695	0.942968	no significant	0.0644173	0.130843	0.176033	0.249395	0	0.063896
chr1_203676136_203677232_+	hsa_circATP2B4_017	hsa_circ_0007167	458	ATP2B4	exon-exon	-0.380478	0.462031	0.880488	no significant	0.193252	0.373838	0.400076	0.124698	0.421916	0.223636
chr1_78097534_78107340_-	hsa_circZZZ3_005	hsa_circ_0114166	1907	ZZZ3	exon-exon	-0.38572	0.54403	0.910982	no significant	0.418712	0.112151	0.192036	0.290961	0.115068	0.127792
chr2_122363276_122363756_-	hsa_circCLASP1_002	hsa_circ_0007052	480	CLASP1	exon-exon	-0.387209	0.55218	0.910982	no significant	0.161043	0.168227	0.16003	0.207829	0.153424	0.031948
chr19_34921480_34925873_+	hsa_circUBA2_006	hsa_circ_0005325	321	UBA2	exon-exon	-0.388144	0.651592	0.952007	no significant	0.193252	0.149535	0.016003	0	0.153424	0.095844
chr3_56703727_56707753_-	hsa_circFAM208A_006	hsa_circ_0001316	404	FAM208A	exon-exon	-0.392001	0.546725	0.910982	no significant	0.22546	0.168227	0.16003	0.290961	0.0767119	0.063896
chr4_39328182_39329376_-	hsa_circRFC1_002	hsa_circ_0001403	311	RFC1	exon-exon	-0.392158	0.532727	0.908488	no significant	0.193252	0.280378	0.112021	0.124698	0.19178	0.127792
chr10_69748419_69773943_-	hsa_circHERC4_038	hsa_circ_0018484	898	HERC4	exon-exon	-0.392256	0.55769	0.910982	no significant	0.128835	0.149535	0.112021	0.124698	0.115068	0.063896
chr3_113207791_113225452_-	hsa_circSPICE1_002	hsa_circ_0006163	611	SPICE1	exon-exon	-0.393197	0.606485	0.936496	no significant	0.0644173	0.317762	0.112021	0.0831317	0	0.287532
chr5_132227855_132228810_-	hsa_circAFF4_016	hsa_circ_0001529	330	AFF4	exon-exon	-0.393229	0.515797	0.908488	no significant	0.193252	0.205611	0.272051	0.332527	0.038356	0.15974
chr19_17387303_17387718_+	hsa_circBABAM1_010	hsa_circ_0003253	217	BABAM1	exon-exon	-0.393431	0.460032	0.880488	no significant	0.193252	0.485989	0.256048	0.124698	0.345204	0.255584
chr5_49694940_49707217_-	hsa_circEMB_003	hsa_circ_0001481	954	EMB	exon-exon	-0.394255	0.563536	0.912207	no significant	0.450921	0.0560757	0.272051	0.332527	0.19178	0.063896
chr4_25334804_25335610_+	hsa_circZCCHC4_003	hsa_circ_0001398	357	ZCCHC4	exon-exon	-0.396735	0.519346	0.908488	no significant	0.193252	0.149535	0.192036	0.0831317	0.19178	0.127792
chr1_70758070_70781249_-	hsa_circANKRD13C_011	hsa_circ_0000085	638	ANKRD13C	exon-exon	-0.398419	0.425256	0.862098	no significant	0.193252	0.373838	0.416079	0.249395	0.345204	0.191688
chr16_47531309_47549512_+	hsa_circPHKB_015	hsa_circ_0000698	518	PHKB	exon-exon	-0.404162	0.380213	0.852356	no significant	0.322086	0.579449	0.512097	0.374093	0.268492	0.447272
chr11_59426338_59426942_-	hsa_circPATL1_003	hsa_circ_0004162	299	PATL1	exon-exon	-0.40525	0.538057	0.909525	no significant	0.193252	0.130843	0.128024	0.0415659	0.153424	0.127792
chr2_30748452_30756180_+	hsa_circLCLAT1_003	hsa_circ_0000987	368	LCLAT1	exon-exon	-0.408587	0.548957	0.910982	no significant	0.128835	0.130843	0.128024	0.0831317	0.038356	0.15974
chr12_32760890_32764217_+	hsa_circFGD4_024	hsa_circ_0000390	345	FGD4	exon-exon	-0.410858	0.54168	0.909525	no significant	0.128835	0.130843	0.272051	0.290961	0.0767119	0.063896
chr20_30954186_30959677_+	hsa_circASXL1_004	hsa_circ_0006922	2946	ASXL1	exon-intergenic	-0.412353	0.532064	0.908488	no significant	0.161043	0.242995	0.192036	0.207829	0.268492	0
chr12_69983264_69987393_+	hsa_circCCT2_009	hsa_circ_0002940	536	CCT2	exon-exon	-0.413666	0.558093	0.910982	no significant	0.0322086	0.168227	0.16003	0.0831317	0.0767119	0.127792
chr10_28872327_28884970_+	hsa_circWAC_009	hsa_circ_0007503	645	WAC	exon-exon	-0.415391	0.527213	0.908488	no significant	0.161043	0.242995	0.144027	0.290961	0.0767119	0.063896
chr1_8601272_8617582_-	hsa_circRERE_033	hsa_circ_0002158	308	RERE	exon-exon	-0.415591	0.521902	0.908488	no significant	0.193252	0.149535	0.208039	0.290961	0.0767119	0.063896
chr10_7839009_7844817_+	hsa_circATP5C1_006	hsa_circ_0007292	799	ATP5C1	exon-exon	-0.42219	0.350478	0.842153	no significant	0.70859	1.04675	0.544103	0.70662	0.690407	0.351428
chr10_31661946_31676195_+	hsa_circZEB1_013	hsa_circ_0000228	14249	not_annotated	intergenic-intergenic	-0.423371	0.38036	0.852356	no significant	0.322086	0.485989	0.36807	0.457225	0.19178	0.255584
chr6_74432973_74446231_+	hsa_circCD109_003	hsa_circ_0002465	386	CD109	exon-exon	-0.423728	0.475631	0.890479	no significant	0.257669	0.186919	0.336064	0.0415659	0.38356	0.15974
chr15_32815229_32825569_-	NA	NA		WHAMMP1	exon-exon	-0.423746	0.557302	0.910982	no significant	0.0644173	0.261686	0.0960182	0.0415659	0.115068	0.15974
chr5_142416760_142437312_+	hsa_circARHGAP26_014	hsa_circ_0074368	394	ARHGAP26	exon-exon	-0.424313	0.549512	0.910982	no significant	0.0966259	0.112151	0.128024	0.0415659	0.0767119	0.127792
chr9_125042721_125054119_+	hsa_circMRRF_008	hsa_circ_0003250	367	MRRF	exon-exon	-0.429776	0.540453	0.909525	no significant	0.128835	0.130843	0.0960182	0.124698	0.0767119	0.063896
chr14_23395341_23396869_-	hsa_circPRMT5_005	hsa_circ_0002928	462	PRMT5	exon-exon	-0.429958	0.493261	0.90243	no significant	0.289878	0.149535	0.208039	0.0831317	0.0767119	0.287532
chr8_68018139_68028357_+	hsa_circCSPP1_041	hsa_circ_0001806	432	CSPP1	exon-exon	-0.432658	0.513776	0.908488	no significant	0.0644173	0.242995	0.16003	0.0831317	0.115068	0.15974
chr15_49528047_49584734_+	hsa_circGALK2_010	hsa_circ_0035189	701	GALK2	exon-exon	-0.433431	0.40637	0.862098	no significant	0.257669	0.280378	0.400076	0.290961	0.345204	0.095844
chr1_103540173_103548528_-	hsa_circCOL11A1_002	hsa_circ_0110255	545	COL11A1	exon-exon	-0.43496	0.64976	0.950909	no significant	0.128835	0.112151	0.016003	0	0	0.15974
chr10_116719484_116734144_+	hsa_circTRUB1_005	hsa_circ_0020091	352	TRUB1	exon-exon	-0.437145	0.552684	0.910982	no significant	0.0322086	0.168227	0.176033	0.207829	0.038356	0.063896
chr4_52729602_52765544_+	hsa_circDCUN1D4_015	hsa_circ_0069718	590	DCUN1D4	exon-exon	-0.440795	0.476502	0.890686	no significant	0.161043	0.242995	0.192036	0.124698	0.268492	0.063896
chr20_34309661_34313077_-	hsa_circRBM39_017	hsa_circ_0001148	409	RBM39	exon-exon	-0.444628	0.512977	0.908488	no significant	0.128835	0.130843	0.144027	0.166263	0.115068	0.031948
chr3_142455220_142467302_+	hsa_circTRPC1_004	hsa_circ_0001345	460	TRPC1	exon-exon	-0.44634	0.356036	0.842153	no significant	0.354295	0.336454	0.672127	0.249395	0.421916	0.351428
chr7_140476711_140494267_-	hsa_circBRAF_033	hsa_circ_0006460	714	BRAF	exon-exon	-0.44704	0.534274	0.908808	no significant	0.161043	0.0934594	0.112021	0.0415659	0.153424	0.063896
chr7_99090662_99092254_-	hsa_circZNF394_003	hsa_circ_0001726	1592	ZNF394	intergenic-exon	-0.44777	0.292662	0.804684	no significant	0.579755	0.841135	0.672127	0.581922	0.536983	0.447272
chr16_11114049_11154879_+	hsa_circCLEC16A_028	hsa_circ_0000672	813	CLEC16A	exon-exon	-0.44932	0.605687	0.936496	no significant	0.161043	0.130843	0.0320061	0	0.19178	0.031948
chr8_62531536_62566219_-	hsa_circASPH_017	hsa_circ_0084606	654	ASPH	exon-exon	-0.44955	0.316057	0.816976	no significant	0.515338	0.635524	0.448085	0.290961	0.498628	0.383376
chr14_45587230_45599993_-	hsa_circFKBP3_003	hsa_circ_0101874	502	FKBP3	exon-exon	-0.453969	0.336781	0.830508	no significant	0.386504	0.523373	0.912173	0.623488	0.306848	0.447272
chr14_23378691_23380612_-	hsa_circRBM23_004	hsa_circ_0000524	189	RBM23	exon-exon	-0.45544	0.528851	0.908488	no significant	0.257669	0.149535	0.0800151	0.0415659	0.230136	0.063896
chr2_24357988_24362320_+	hsa_circLOC375190_003	hsa_circ_0007270	342	FAM228B	exon-exon	-0.455798	0.539218	0.909525	no significant	0.0322086	0.130843	0.16003	0.0415659	0.0767119	0.127792
chr11_85707868_85742653_-	hsa_circPICALM_022	hsa_circ_0023923	1128	PICALM	exon-exon	-0.456799	0.270369	0.797732	no significant	1.09509	0.953286	1.13621	0.49879	0.958899	0.862596
chr5_36953719_36976504_+	hsa_circNIPBL_007	hsa_circ_0001472	1574	NIPBL	exon-exon	-0.457013	0.411798	0.862098	no significant	0.322086	0.411222	0.256048	0.374093	0.345204	0.031948
chr3_157839891_157841780_+	hsa_circRSRC1_002	hsa_circ_0001355	322	RSRC1	exon-exon	-0.45764	0.323786	0.817698	no significant	0.48313	0.373838	0.36807	0.249395	0.306848	0.31948
chr20_21346058_21349228_+	hsa_circXRN2_043	hsa_circ_0003298	329	XRN2	exon-exon	-0.458134	0.410416	0.862098	no significant	0.289878	0.280378	0.208039	0.249395	0.230136	0.095844
chr18_8076452_8088849_+	hsa_circPTPRM_017	hsa_circ_0006114	415	PTPRM	exon-exon	-0.458362	0.424458	0.862098	no significant	0.289878	0.280378	0.16003	0.207829	0.19178	0.127792
chr14_102506572_102507010_+	hsa_circDYNC1H1_192	hsa_circ_0002398	251	DYNC1H1	exon-exon	-0.45989	0.460895	0.880488	no significant	0.450921	0.224303	0.128024	0.0831317	0.306848	0.15974
chr16_17352844_17353355_-	hsa_circXYLT1_004	hsa_circ_0003559	511	XYLT1	exon-exon	-0.461018	0.525666	0.908488	no significant	0.257669	0.0747676	0.112021	0.166263	0.0767119	0.063896
chr4_52729602_52744020_+	hsa_circDCUN1D4_011	hsa_circ_0001410	318	DCUN1D4	exon-exon	-0.466016	0.389197	0.861722	no significant	0.289878	0.224303	0.256048	0.207829	0.153424	0.191688
chr3_195415403_195416309_+	hsa_circSDHAP2_004	hsa_circ_0008267	906	SDHAP2	exon-intergenic	-0.466367	0.54138	0.909525	no significant	0.161043	0.0373838	0.336064	0	0.19178	0.191688
chrX_139865339_139866824_+	hsa_circCDR1_001	hsa_circ_0001946	1485	not_annotated	intergenic-intergenic	-0.470758	0.312422	0.811882	no significant	129.93	108.787	88.0167	28.3895	94.7009	113.639
chr1_27269150_27269556_+	hsa_circNUDC_008	hsa_circ_0005087	312	NUDC	exon-exon	-0.471963	0.325126	0.817698	no significant	0.48313	0.635524	0.464088	0.623488	0.153424	0.383376
chr15_76146726_76175765_+	hsa_circUBE2Q2_005	hsa_circ_0036372	704	UBE2Q2	exon-exon	-0.476774	0.536863	0.909254	no significant	0.0322086	0.186919	0.112021	0.0415659	0.038356	0.15974
chr1_40654726_40668286_+	hsa_circRLF_006	hsa_circ_0006373	573	RLF	exon-exon	-0.480907	0.463986	0.882779	no significant	0.0966259	0.355146	0.176033	0.0831317	0.0767119	0.287532
chr16_9009110_9011013_-	hsa_circUSP7_005	hsa_circ_0005152	358	USP7	exon-exon	-0.482011	0.496292	0.90243	no significant	0.128835	0.317762	0.0960182	0.0415659	0.0767119	0.255584
chr17_28011580_28030080_-	hsa_circSSH2_011	hsa_circ_0000754	291	SSH2	exon-exon	-0.484714	0.506754	0.908127	no significant	0.0966259	0.205611	0.112021	0.166263	0.153424	0
chr15_90982563_90986710_+	hsa_circIQGAP1_015	hsa_circ_0000651	446	IQGAP1	exon-exon	-0.485218	0.301443	0.804684	no significant	0.386504	0.411222	0.336064	0.290961	0.230136	0.287532
chr8_68934270_68950527_+	hsa_circPREX2_007	hsa_circ_0137008	503	PREX2	exon-exon	-0.485262	0.525026	0.908488	no significant	0.0322086	0.205611	0.16003	0.124698	0.19178	0
chr21_17135209_17138460_+	hsa_circUSP25_003	hsa_circ_0001178	223	USP25	exon-exon	-0.485704	0.356406	0.842153	no significant	0.579755	0.336454	0.224042	0.249395	0.38356	0.15974
chrX_134679347_134690225_+	hsa_circDDX26B_008	hsa_circ_0139799	1003	DDX26B	exon-exon	-0.487855	0.320239	0.81769	no significant	0.289878	0.429913	0.304058	0.332527	0.19178	0.223636
chr3_183361267_183390272_+	hsa_circKLHL24_007	hsa_circ_0001368	1726	KLHL24	exon-exon	-0.488377	0.484655	0.901613	no significant	0.0322086	0.242995	0.16003	0.0831317	0.153424	0.095844
chr1_14057494_14068652_+	hsa_circPRDM2_005	hsa_circ_0005986	375	PRDM2	exon-exon	-0.490242	0.435766	0.863536	no significant	0.22546	0.186919	0.16003	0.0831317	0.0767119	0.223636
chr5_94204037_94259726_-	hsa_circMCTP1_021	hsa_circ_0006639	1224	MCTP1	exon-exon	-0.490341	0.591751	0.932132	no significant	0.128835	0.0373838	0.112021	0.207829	0	0
chr3_57276883_57301820_+	hsa_circAPPL1_011	hsa_circ_0066251	1478	APPL1	exon-exon	-0.493624	0.502546	0.904737	no significant	0.0644173	0.149535	0.128024	0.0415659	0.038356	0.15974
chr2_61749745_61761038_-	hsa_circXPO1_005	hsa_circ_0001017	307	XPO1	exon-exon	-0.494147	0.253793	0.784817	no significant	0.70859	1.06544	0.592112	0.540356	0.575339	0.575064
chr14_99924615_99932150_-	hsa_circSETD3_003	hsa_circ_0000567	683	SETD3	exon-exon	-0.495414	0.209567	0.745107	no significant	1.35276	1.70096	1.34425	0.956015	0.997255	1.18208
chr14_21698477_21702388_-	hsa_circHNRNPC_010	hsa_circ_0003643	440	HNRNPC	exon-exon	-0.495589	0.488009	0.90243	no significant	0.289878	0.0934594	0.128024	0.207829	0.115068	0.031948
chr12_29812812_29813818_-	hsa_circTMTC1_017	hsa_circ_0025765	1006	not_annotated	intergenic-intergenic	-0.498966	0.417938	0.862098	no significant	0.22546	0.186919	0.176033	0.166263	0.19178	0.063896
chr11_77394754_77404656_-	hsa_circRSF1_029	hsa_circ_0000344	350	RSF1	exon-exon	-0.50022	0.293522	0.804684	no significant	0.450921	0.373838	0.384073	0.207829	0.421916	0.223636
chr15_56680669_56687032_+	hsa_circTEX9_006	hsa_circ_0000603	565	TEX9	exon-exon	-0.50079	0.448289	0.87193	no significant	0.128835	0.242995	0.144027	0.0831317	0.230136	0.063896
chr6_152650864_152653025_-	hsa_circSYNE1_022	hsa_circ_0078328	2161	SYNE1	exon-exon	-0.500836	0.526133	0.908488	no significant	0.193252	0.149535	0.0480091	0.166263	0	0.095844
chr3_197592293_197602646_+	hsa_circLRCH3_067	hsa_circ_0008351	4727	LRCH3	exon-intergenic	-0.505187	0.455519	0.876631	no significant	0.22546	0.149535	0.224042	0.290961	0.153424	0
chr5_82832825_82838087_+	hsa_circVCAN_009	hsa_circ_0073237	5262	VCAN	exon-exon	-0.510083	0.37607	0.852356	no significant	1.35276	1.23366	2.32044	2.66022	0.652051	0.223636
chr3_125032151_125050082_-	hsa_circZNF148_006	hsa_circ_0001333	566	ZNF148	exon-exon	-0.510194	0.388579	0.861722	no significant	0.257669	0.149535	0.320061	0.207829	0.0767119	0.223636
chr2_24360778_24369956_+	hsa_circLOC375190_007	hsa_circ_0119531	518	FAM228B	exon-exon	-0.510667	0.507667	0.908374	no significant	0.193252	0.149535	0.0960182	0	0.268492	0.031948
chr7_158662545_158669382_+	hsa_circWDR60_001	hsa_circ_0001778	558	WDR60	exon-exon	-0.514737	0.400929	0.862098	no significant	0.289878	0.186919	0.208039	0.0831317	0.0767119	0.287532
chr2_72945231_72960247_-	hsa_circEXOC6B_010	hsa_circ_0009043	390	EXOC6B	exon-exon	-0.515585	0.20114	0.736061	no significant	1.61043	1.17759	1.96837	1.08071	1.18903	1.08623
chr14_56078736_56086030_+	hsa_circKTN1_003	hsa_circ_0032029	993	KTN1	exon-exon	-0.517679	0.47548	0.890479	no significant	0.193252	0.0934594	0.208039	0.249395	0.115068	0
chr11_120345268_120348235_+	hsa_circARHGEF12_073	hsa_circ_0002100	499	ARHGEF12	exon-exon	-0.518631	0.270208	0.797732	no significant	0.611964	0.803751	0.400076	0.249395	0.421916	0.575064
chrX_107083899_107097934_+	hsa_circMID2_001	hsa_circ_0002153	812	MID2	exon-exon	-0.518805	0.358159	0.842218	no significant	0.289878	0.336454	0.176033	0.124698	0.268492	0.15974
chr2_227729319_227732034_+	hsa_circRHBDD1_002	hsa_circ_0058493	656	RHBDD1	exon-exon	-0.519605	0.339431	0.830508	no significant	0.418712	0.29907	0.272051	0.457225	0.115068	0.127792
chr2_230723487_230744844_-	hsa_circTRIP12_004	hsa_circ_0003273	950	TRIP12	exon-exon	-0.520341	0.326307	0.818307	no significant	0.193252	0.336454	0.288055	0.166263	0.19178	0.223636
chr16_53289511_53308214_+	hsa_circCHD9_048	hsa_circ_0039366	938	CHD9	exon-exon	-0.52263	0.498646	0.90243	no significant	0.0322086	0.112151	0.192036	0.0415659	0.038356	0.15974
chr14_50292584_50298079_-	hsa_circNEMF_031	hsa_circ_0101960	695	NEMF	exon-exon	-0.524415	0.429026	0.862098	no significant	0.161043	0.242995	0.176033	0.0415659	0.306848	0.063896
chr3_57276883_57282379_+	hsa_circAPPL1_008	hsa_circ_0001317	448	APPL1	exon-exon	-0.526403	0.302052	0.804684	no significant	0.386504	0.29907	0.448085	0.124698	0.19178	0.447272
chr5_65284462_65290692_+	hsa_circERBB2IP_004	hsa_circ_0001492	364	ERBB2IP	exon-exon	-0.526791	0.273616	0.799227	no significant	0.354295	0.504681	0.304058	0.290961	0.268492	0.255584
chr13_28830428_28835595_+	hsa_circPAN3_032	hsa_circ_0008902	411	PAN3	exon-exon	-0.534179	0.390138	0.861722	no significant	0.161043	0.317762	0.16003	0.249395	0.115068	0.095844
chr6_13579682_13584457_+	hsa_circSIRT5_002	hsa_circ_0007218	309	SIRT5	exon-exon	-0.535935	0.247967	0.779134	no significant	0.450921	0.710292	0.608115	0.49879	0.19178	0.543116
chr22_46125304_46136418_+	hsa_circATXN10_025	hsa_circ_0001247	445	ATXN10	exon-exon	-0.539497	0.294402	0.804684	no significant	0.450921	0.542065	0.272051	0.207829	0.153424	0.47922
chr16_27224905_27226329_+	hsa_circJMJD5_003	hsa_circ_0038704	300	KDM8	exon-exon	-0.547034	0.438162	0.864522	no significant	0.193252	0.0747676	0.176033	0.166263	0.038356	0.095844
chr14_64988204_64990120_+	hsa_circZBTB1_001	hsa_circ_0102420	1916	ZBTB1	exon-exon	-0.548919	0.379471	0.852356	no significant	0.128835	0.168227	0.224042	0.124698	0.115068	0.127792
chr11_36248634_36248980_+	hsa_circLDLRAD3_007	hsa_circ_0006988	346	LDLRAD3	exon-exon	-0.549352	0.303078	0.804684	no significant	0.22546	0.261686	0.352067	0.124698	0.268492	0.191688
chr10_99196173_99197507_-	hsa_circEXOSC1_009	hsa_circ_0005887	271	EXOSC1	exon-exon	-0.549945	0.25517	0.786997	no significant	0.515338	0.542065	0.304058	0.207829	0.421916	0.287532
chr3_152163070_152165562_+	hsa_circMBNL1_007	hsa_circ_0007630	466	MBNL1	exon-exon	-0.551649	0.42476	0.862098	no significant	0.193252	0.130843	0.128024	0.0831317	0.19178	0.031948
chr1_93029198_93101893_-	hsa_circEVI5_029	hsa_circ_0013163	774	EVI5	exon-exon	-0.551826	0.454659	0.876631	no significant	0.257669	0.0934594	0.112021	0.166263	0	0.127792
chrX_53641494_53642796_-	hsa_circHUWE1_057	hsa_circ_0007817	304	HUWE1	exon-exon	-0.557777	0.350272	0.842153	no significant	0.161043	0.224303	0.288055	0.124698	0.0767119	0.255584
chr1_59787207_59812070_+	hsa_circFGGY_005	hsa_circ_0000075	479	FGGY	exon-exon	-0.560379	0.356078	0.842153	no significant	0.22546	0.224303	0.240045	0.124698	0.038356	0.287532
chr5_40852275_40854198_+	hsa_circCARD6_001	hsa_circ_0005895	1923	CARD6	exon-exon	-0.563249	0.243402	0.776629	no significant	0.354295	0.373838	0.416079	0.374093	0.268492	0.15974
chr16_17448955_17451907_-	hsa_circXYLT1_002	hsa_circ_0105096	356	XYLT1	intergenic-exon	-0.563301	0.4171	0.862098	no significant	0.0966259	0.130843	0.144027	0.124698	0.038356	0.095844
chr10_15875628_15889942_-	hsa_circFAM188A_005	hsa_circ_0006665	636	FAM188A	exon-exon	-0.563418	0.268048	0.797732	no significant	0.289878	0.355146	0.336064	0.374093	0.19178	0.127792
chr2_183817132_183818059_-	hsa_circNCKAP1_066	hsa_circ_0002092	448	NCKAP1	exon-exon	-0.566773	0.442141	0.866537	no significant	0.128835	0.112151	0.0960182	0.0415659	0.115068	0.063896
chr2_55209650_55214834_-	hsa_circRTN4_012	hsa_circ_0001006	347	RTN4	exon-exon	-0.574864	0.236156	0.770572	no significant	0.289878	0.504681	0.336064	0.249395	0.268492	0.255584
chr6_76412360_76421132_+	hsa_circSENP6_053	hsa_circ_0077096	621	SENP6	exon-exon	-0.57594	0.376353	0.852356	no significant	0.0966259	0.168227	0.208039	0.0831317	0.153424	0.095844
chr11_85685750_85695016_-	hsa_circPICALM_090	hsa_circ_0006629	560	PICALM	exon-exon	-0.576603	0.444428	0.868116	no significant	0.161043	0.112151	0.0800151	0.124698	0.0767119	0.031948
chr7_24663281_24708279_+	hsa_circMPP6_015	hsa_circ_0133996	1119	MPP6	intergenic-exon	-0.57787	0.333503	0.828106	no significant	0.22546	0.485989	0.464088	0	0.613695	0.191688
chr19_5604593_5604947_-	hsa_circSAFB2_013	hsa_circ_0000880	263	SAFB2	exon-exon	-0.585734	0.354713	0.842153	no significant	0.322086	0.168227	0.208039	0.166263	0.268492	0.031948
chr13_21305979_21306260_-	hsa_circN6AMT2_002	hsa_circ_0003285	281	N6AMT2	exon-exon	-0.590299	0.436925	0.863536	no significant	0.128835	0.0560757	0.256048	0.207829	0.038356	0.063896
chr11_130130750_130131824_-	hsa_circZBTB44_003	hsa_circ_0002484	1074	ZBTB44	exon-exon	-0.593292	0.189342	0.719294	no significant	1.1273	1.14021	0.816154	1.16384	0.498628	0.415324
chr2_58425728_58459247_-	hsa_circFANCL_005	hsa_circ_0004435	444	FANCL	exon-exon	-0.593664	0.271583	0.797732	no significant	0.22546	0.579449	0.336064	0.415659	0.0767119	0.287532
chr9_33986757_34017187_-	hsa_circUBAP2_008	hsa_circ_0086735	561	UBAP2	exon-exon	-0.598739	0.405333	0.862098	no significant	0.161043	0.0560757	0.272051	0.0831317	0.0767119	0.15974
chr11_118422500_118430579_-	hsa_circIFT46_004	hsa_circ_0007372	860	IFT46	exon-exon	-0.599702	0.326764	0.818307	no significant	0.128835	0.261686	0.208039	0.166263	0.153424	0.095844
chr1_243776972_243859018_-	hsa_circAKT3_023	hsa_circ_0017251	650	AKT3	exon-exon	-0.599753	0.363026	0.844184	no significant	0.161043	0.205611	0.144027	0.166263	0.153424	0.031948
chr2_240929490_240946787_-	hsa_circNDUFA10_020	hsa_circ_0001118	250	NDUFA10	exon-exon	-0.600227	0.296197	0.804684	no significant	0.322086	0.224303	0.208039	0.207829	0.19178	0.095844
chr15_76566752_76588078_-	hsa_circETFA_010	hsa_circ_0000638	777	ETFA	exon-exon	-0.602191	0.39288	0.862098	no significant	0.322086	0.205611	0.0800151	0.207829	0.153424	0.031948
chr4_144464661_144465125_+	hsa_circSMARCA5_013	hsa_circ_0001445	269	SMARCA5	exon-exon	-0.605034	0.207379	0.745107	no significant	2.51227	1.88788	1.93637	2.20299	0.38356	1.5974
chr2_110342702_110350696_-	hsa_circSEPT10_002	hsa_circ_0008953	383	SEPT10	exon-exon	-0.607641	0.243856	0.776629	no significant	0.289878	0.728984	0.336064	0.290961	0.153424	0.447272
chr1_179955303_179975702_+	hsa_circCEP350_005	hsa_circ_0111364	1259	CEP350	exon-exon	-0.61379	0.382519	0.853928	no significant	0.161043	0.149535	0.0960182	0.0831317	0.038356	0.127792
chr12_12397195_12397589_-	hsa_circLRP6_002	hsa_circ_0000378	394	LRP6	exon-exon	-0.617146	0.201109	0.736061	no significant	0.354295	0.411222	0.496094	0.124698	0.345204	0.351428
chr12_19615443_19626289_+	hsa_circAEBP2_003	hsa_circ_0006420	316	AEBP2	exon-exon	-0.619165	0.397447	0.862098	no significant	0.0644173	0.168227	0.144027	0.124698	0	0.127792
chr22_22153300_22162135_-	hsa_circMAPK1_004	hsa_circ_0004872	490	MAPK1	exon-exon	-0.619956	0.416833	0.862098	no significant	0.128835	0.112151	0.112021	0.166263	0.0767119	0
chr9_123593608_123595734_-	hsa_circPSMD5_004	hsa_circ_0088300	388	PSMD5	exon-exon	-0.620852	0.402487	0.862098	no significant	0.128835	0.186919	0.0800151	0.0415659	0.038356	0.15974
chr11_85685750_85742653_-	hsa_circPICALM_028	hsa_circ_0023891	1814	PICALM	exon-exon	-0.622071	0.339206	0.830508	no significant	0.22546	0.112151	0.240045	0.207829	0.0767119	0.095844
chr16_11063017_11076848_+	hsa_circCLEC16A_006	hsa_circ_0004179	728	CLEC16A	exon-exon	-0.628076	0.406736	0.862098	no significant	0.0644173	0.149535	0.112021	0.0415659	0.038356	0.127792
chr12_32751430_32764217_+	hsa_circFGD4_012	hsa_circ_0025843	738	FGD4	exon-exon	-0.62864	0.212886	0.745107	no significant	0.450921	0.635524	0.704133	0.789752	0.230136	0.191688
chr8_68030482_68049838_+	hsa_circCSPP1_052	hsa_circ_0084678	479	CSPP1	exon-exon	-0.636814	0.383279	0.853998	no significant	0.128835	0.112151	0.112021	0.0831317	0.115068	0.031948
chr2_227729319_227779067_+	hsa_circRHBDD1_005	hsa_circ_0058495	946	RHBDD1	exon-exon	-0.637464	0.158268	0.685581	no significant	0.450921	0.504681	0.512097	0.249395	0.345204	0.351428
chr9_16435552_16437522_-	hsa_circBNC2_013	hsa_circ_0086414	1970	BNC2	exon-exon	-0.64031	0.229643	0.762441	no significant	0.418712	0.186919	0.592112	0.207829	0.345204	0.223636
chr7_140055467_140058585_-	hsa_circSLC37A3_011	hsa_circ_0004069	243	SLC37A3	exon-exon	-0.644346	0.360745	0.842218	no significant	0.161043	0.0934594	0.16003	0.124698	0.115068	0.031948
chr18_56601664_56621031_+	hsa_circZNF532_016	hsa_circ_0003423	804	ZNF532	exon-exon	-0.6467	0.216887	0.745431	no significant	0.354295	0.485989	0.336064	0.207829	0.0767119	0.447272
chr1_114377531_114397671_-	hsa_circPTPN22_003	hsa_circ_0110529	1354	PTPN22	exon-exon	-0.648298	0.272908	0.799227	no significant	0.193252	0.224303	0.256048	0.0831317	0.115068	0.223636
chr22_46189424_46202902_+	hsa_circATXN10_033	hsa_circ_0116783	298	ATXN10	intergenic-exon	-0.652981	0.35568	0.842153	no significant	0.193252	0.112151	0.208039	0.0831317	0	0.223636
chr1_46124699_46126897_-	hsa_circGPBP1L1_002	hsa_circ_0000068	1157	GPBP1L1	exon-exon	-0.653649	0.417451	0.862098	no significant	0.128835	0.168227	0.0960182	0	0	0.223636
chr1_117944807_117957453_+	hsa_circMAN1A2_007	hsa_circ_0000117	472	MAN1A2	exon-exon	-0.659159	0.125622	0.654374	no significant	1.61043	1.28974	0.768145	0.872883	0.805475	0.63896
chr2_63206322_63223901_+	hsa_circEHBP1_019	hsa_circ_0005552	751	EHBP1	exon-exon	-0.660646	0.309533	0.811882	no significant	0.322086	0.168227	0.128024	0.0831317	0.153424	0.127792
chrX_24190831_24197887_+	hsa_circZFX_006	hsa_circ_0007108	674	ZFX	exon-exon	-0.662802	0.324376	0.817698	no significant	0.161043	0.149535	0.16003	0.0415659	0.19178	0.063896
chr2_148730307_148739650_-	hsa_circORC4_004	hsa_circ_0004491	396	ORC4	exon-exon	-0.663412	0.288176	0.804684	no significant	0.161043	0.168227	0.240045	0.124698	0.0767119	0.15974
chr5_95084036_95119667_+	hsa_circRHOBTB3_015	hsa_circ_0073441	1208	RHOBTB3	exon-exon	-0.668855	0.410634	0.862098	no significant	0.193252	0.112151	0.0640121	0	0.038356	0.15974
chr1_59805629_59844509_+	hsa_circFGGY_013	hsa_circ_0006633	353	FGGY	exon-exon	-0.670169	0.175999	0.697601	no significant	0.386504	0.523373	0.352067	0.207829	0.153424	0.415324
chr10_93185037_93221941_+	hsa_circHECTD2_002	hsa_circ_0007168	462	HECTD2	exon-exon	-0.67195	0.188901	0.719294	no significant	0.193252	0.635524	0.5281	0.207829	0.421916	0.255584
chr4_128995614_129003460_+	hsa_circLARP1B_004	hsa_circ_0007619	435	LARP1B	exon-exon	-0.677154	0.341914	0.834839	no significant	0.128835	0.168227	0.112021	0.0415659	0.038356	0.15974
chr7_151917607_151935911_-	hsa_circMLL3_077	hsa_circ_0002810	1180	KMT2C	exon-exon	-0.677395	0.329826	0.822459	no significant	0.193252	0.149535	0.144027	0.207829	0	0.095844
chr3_101389973_101391057_-	hsa_circZBTB11_002	hsa_circ_0003179	468	ZBTB11	exon-exon	-0.679092	0.344647	0.838119	no significant	0.193252	0.112151	0.176033	0	0.230136	0.063896
chr17_19823348_19866335_-	hsa_circAKAP10_006	hsa_circ_0042409	1698	AKAP10	exon-exon	-0.682134	0.41572	0.862098	no significant	0.193252	0.149535	0.0320061	0	0.0767119	0.127792
chr6_170852688_170858201_-	hsa_circPSMB1_004	hsa_circ_0006107	320	PSMB1	exon-exon	-0.688066	0.289587	0.804684	no significant	0.193252	0.149535	0.256048	0.249395	0.0767119	0.063896
chr4_140046317_140060651_-	hsa_circELF2_005	hsa_circ_0001441	489	ELF2	exon-intergenic	-0.68956	0.114204	0.637171	no significant	0.579755	0.859827	0.624118	0.457225	0.460272	0.383376
chr6_18236682_18258636_-	hsa_circDEK_005	hsa_circ_0075796	902	DEK	exon-exon	-0.690136	0.21549	0.745391	no significant	1.41718	1.34582	1.37626	0.457225	0.153424	1.91688
chr7_70227855_70236630_+	hsa_circAUTS2_033	hsa_circ_0080420	1088	AUTS2	exon-exon	-0.690945	0.248765	0.779553	no significant	0.193252	0.242995	0.304058	0.0831317	0.0767119	0.287532
chr15_25650607_25657118_-	hsa_circUBE3A_009	hsa_circ_0000586	291	UBE3A	exon-exon	-0.69389	0.143792	0.678462	no significant	0.805216	1.12151	0.496094	0.789752	0.345204	0.383376
chr6_73357659_73358632_+	hsa_circKCNQ5_001	hsa_circ_0132255	973	not_annotated	intergenic-intergenic	-0.693947	0.312317	0.811882	no significant	0.0966259	0.168227	0.352067	0	0.230136	0.15974
chr18_51804072_51813781_+	hsa_circPOLI_018	hsa_circ_0003428	792	POLI	exon-exon	-0.694318	0.17104	0.697601	no significant	0.257669	0.542065	0.512097	0.290961	0.115068	0.415324
chr1_155408117_155408859_-	hsa_circASH1L_024	hsa_circ_0000137	742	ASH1L	exon-exon	-0.696745	0.158942	0.685581	no significant	0.579755	0.654216	0.68813	0.49879	0.0767119	0.607012
chr8_141856358_141900868_-	hsa_circPTK2_022	hsa_circ_0003221	625	PTK2	exon-exon	-0.70022	0.149486	0.678462	no significant	0.644173	0.654216	0.512097	0.623488	0.115068	0.383376
chr18_12999419_13030607_+	hsa_circCEP192_007	hsa_circ_0107922	1538	CEP192	exon-exon	-0.700489	0.154511	0.678462	no significant	0.386504	0.336454	0.400076	0.124698	0.230136	0.31948
chr10_97141441_97170534_-	hsa_circSORBS1_010	hsa_circ_0094617	909	SORBS1	exon-exon	-0.700633	0.127572	0.654374	no significant	0.515338	0.859827	0.768145	0.457225	0.230136	0.63896
chr10_32740519_32762951_+	hsa_circCCDC7_007	hsa_circ_0093546	847	CCDC7	exon-exon	-0.702152	0.196559	0.72901	no significant	0.22546	0.261686	0.336064	0.207829	0.153424	0.15974
chrX_117788564_117788924_+	hsa_circDOCK11_034	hsa_circ_0007733	274	DOCK11	exon-exon	-0.703219	0.292043	0.804684	no significant	0.0966259	0.205611	0.224042	0.166263	0.153424	0.031948
chr1_160293220_160302347_-	hsa_circCOPA_021	hsa_circ_0008661	320	COPA	exon-exon	-0.708976	0.303294	0.804684	no significant	0.161043	0.205611	0.128024	0.207829	0.0767119	0.031948
chr3_133894452_133914026_-	hsa_circRYK_016	hsa_circ_0003633	796	RYK	exon-exon	-0.712589	0.359579	0.842218	no significant	0.128835	0.205611	0.0800151	0	0.038356	0.191688
chr2_68717321_68772444_+	hsa_circAPLF_006	hsa_circ_0001023	1190	APLF	exon-exon	-0.715796	0.151083	0.678462	no significant	0.547547	0.29907	0.608115	0.415659	0.153424	0.31948
chr1_65830317_65831879_+	hsa_circDNAJC6_002	hsa_circ_0002454	350	DNAJC6	exon-exon	-0.716959	0.274138	0.799227	no significant	0.128835	0.168227	0.416079	0.290961	0.115068	0.063896
chr17_65941524_65944422_+	hsa_circBPTF_066	hsa_circ_0000798	1226	BPTF	exon-exon	-0.720189	0.212692	0.745107	no significant	0.289878	0.280378	0.240045	0.290961	0.153424	0.063896
chr3_93714717_93722752_+	hsa_circARL13B_002	hsa_circ_0006135	321	ARL13B	exon-exon	-0.721266	0.30298	0.804684	no significant	0.161043	0.0934594	0.176033	0.124698	0.038356	0.095844
chr11_76174864_76183884_+	hsa_circC11orf30_006	hsa_circ_0007458	537	C11orf30	exon-exon	-0.721327	0.317056	0.816976	no significant	0.0966259	0.280378	0.0960182	0.0415659	0.115068	0.127792
chr2_58449076_58459247_-	hsa_circFANCL_003	hsa_circ_0001009	278	FANCL	exon-exon	-0.722083	0.163928	0.693728	no significant	0.515338	0.523373	0.400076	0.332527	0.498628	0.063896
chr8_18656804_18662408_-	hsa_circPSD3_017	hsa_circ_0004458	448	PSD3	exon-exon	-0.724923	0.154762	0.678462	no significant	2.48006	2.33649	4.83291	0.70662	3.79724	1.40571
chr5_58284319_58289292_-	hsa_circPDE4D_047	hsa_circ_0001487	631	PDE4D	exon-exon	-0.725717	0.334947	0.828181	no significant	0.0644173	0.261686	0.144027	0	0.230136	0.063896
chr11_89059823_89088211_-	NA	NA		NOX4	exon-exon	-0.727213	0.390422	0.861722	no significant	0.128835	0.168227	0.0640121	0	0	0.191688
chr10_94291504_94297307_-	hsa_circIDE_005	hsa_circ_0000251	563	IDE	exon-exon	-0.727404	0.317171	0.816976	no significant	0.161043	0.112151	0.112021	0.124698	0.0767119	0.031948
chr13_51501542_51523641_+	hsa_circRNASEH2B_007	hsa_circ_0000489	677	RNASEH2B	exon-exon	-0.730309	0.1143	0.637171	no significant	0.515338	0.429913	0.5281	0.290961	0.38356	0.223636
chr6_132206070_132207864_+	hsa_circENPP1_013	hsa_circ_0130715	296	ENPP1	exon-exon	-0.732242	0.338832	0.830508	no significant	0.0966259	0.130843	0.128024	0	0.038356	0.15974
chr6_76331247_76344527_+	hsa_circSENP6_004	hsa_circ_0077078	406	SENP6	exon-exon	-0.734718	0.337957	0.830508	no significant	0.128835	0.186919	0.0640121	0.124698	0.038356	0.063896
chr11_17153462_17167489_-	hsa_circPIK3C2A_015	hsa_circ_0021396	671	PIK3C2A	exon-exon	-0.737225	0.32355	0.817698	no significant	0.0966259	0.242995	0.208039	0.0415659	0.306848	0
chr8_141799572_141900868_-	hsa_circPTK2_028	hsa_circ_0009071	1209	PTK2	exon-exon	-0.738534	0.310878	0.811882	no significant	0.161043	0.130843	0.0960182	0.124698	0.038356	0.063896
chr2_71653589_71654544_+	hsa_circZNF638_038	hsa_circ_0120910	955	ZNF638	exon-exon	-0.740514	0.290151	0.804684	no significant	0.193252	0.0934594	0.16003	0.124698	0.038356	0.095844
chr1_12335881_12338095_+	hsa_circVPS13D_023	hsa_circ_0009964	2214	VPS13D	exon-exon	-0.743143	0.239868	0.7764	no significant	0.128835	0.29907	0.288055	0.0415659	0.306848	0.095844
chr3_169854206_169867032_-	hsa_circPHC3_023	hsa_circ_0001359	505	PHC3	exon-exon	-0.746649	0.128418	0.654374	no significant	0.48313	0.803751	0.400076	0.166263	0.345204	0.47922
chr13_46090277_46099186_+	hsa_circCOG3_017	hsa_circ_0008937	421	COG3	exon-exon	-0.750095	0.352025	0.842153	no significant	0.0322086	0.149535	0.16003	0.0415659	0	0.15974
chr11_89133184_89185063_-	hsa_circNOX4_004	hsa_circ_0023986	921	NOX4	exon-exon	-0.755081	0.348088	0.841153	no significant	0.0322086	0.149535	0.16003	0	0.038356	0.15974
chr1_67356836_67371058_-	hsa_circWDR78_003	hsa_circ_0006677	473	WDR78	exon-exon	-0.761345	0.0554906	0.464535	no significant	2.12577	1.92526	2.70451	1.12228	1.68766	1.21402
chrX_84322132_84329397_+	hsa_circAPOOL_004	hsa_circ_0140676	324	APOOL	exon-exon	-0.764635	0.30027	0.804684	no significant	0.0966259	0.224303	0.112021	0.166263	0	0.095844
chr13_30801548_30815223_-	hsa_circKATNAL1_023	hsa_circ_0003587	655	KATNAL1	exon-exon	-0.7766	0.185424	0.716479	no significant	0.386504	0.336454	0.176033	0.0415659	0.230136	0.223636
chr14_31404368_31425448_-	hsa_circSTRN3_006	hsa_circ_0031446	706	STRN3	exon-exon	-0.776995	0.205535	0.744645	no significant	0.386504	0.186919	0.224042	0.124698	0.268492	0.063896
chr5_172535626_172539382_+	hsa_circCREBRF_004	hsa_circ_0128617	465	CREBRF	exon-exon	-0.777668	0.253014	0.784477	no significant	0.0966259	0.149535	0.240045	0.0831317	0.153424	0.063896
chr8_106431371_106456609_+	hsa_circZFPM2_005	hsa_circ_0003380	261	ZFPM2	exon-exon	-0.785327	0.214222	0.745107	no significant	0.386504	0.186919	0.16003	0.124698	0.0767119	0.191688
chrX_90669902_90673870_-	hsa_circPABPC5-AS1_001	hsa_circ_0140700	303	PABPC5-AS1	exon-exon	-0.791126	0.167056	0.696761	no significant	0.22546	0.224303	0.36807	0.249395	0.115068	0.127792
chr1_42730785_42744455_-	hsa_circFOXJ3_009	hsa_circ_0113379	512	FOXJ3	exon-intergenic	-0.793752	0.287974	0.804684	no significant	0.193252	0.186919	0.0800151	0.0831317	0	0.15974
chr4_103635594_103647840_-	hsa_circMANBA_013	hsa_circ_0001432	496	MANBA	exon-exon	-0.794719	0.163961	0.693728	no significant	0.161043	0.373838	0.320061	0.166263	0.0767119	0.255584
chr8_99718694_99719539_-	hsa_circSTK3_015	hsa_circ_0004592	333	STK3	exon-exon	-0.795694	0.102908	0.612093	no significant	0.901842	0.429913	0.576109	0.290961	0.575339	0.223636
chr6_145103057_145124283_+	hsa_circUTRN_091	hsa_circ_0001648	725	UTRN	exon-exon	-0.795942	0.111133	0.63468	no significant	0.289878	0.355146	0.5281	0.166263	0.230136	0.287532
chr8_62531536_62557191_-	NA	NA		ASPH	exon-exon	-0.798699	0.257722	0.792783	no significant	0.128835	0.149535	0.16003	0	0.0767119	0.15974
chr4_148775826_148803083_+	hsa_circARHGAP10_011	hsa_circ_0125473	3527	ARHGAP10	intergenic-exon	-0.805588	0.119733	0.646151	no significant	0.22546	0.355146	0.544103	0.249395	0.268492	0.15974
chr4_106345352_106377902_-	hsa_circPPA2_007	hsa_circ_0001434	498	PPA2	exon-exon	-0.80607	0.230706	0.763807	no significant	0.128835	0.280378	0.36807	0.0831317	0	0.351428
chr1_89206670_89251896_+	hsa_circPKN2_005	hsa_circ_0013093	1233	PKN2	exon-exon	-0.812702	0.311147	0.811882	no significant	0.128835	0.0934594	0.112021	0	0.153424	0.031948
chr8_618597_624047_-	hsa_circERICH1_006	hsa_circ_0136839	954	ERICH1	exon-exon	-0.815925	0.210831	0.745107	no significant	0.289878	0.149535	0.240045	0.249395	0.115068	0.031948
chr1_155644800_155649303_-	hsa_circYY1AP1_009	hsa_circ_0003608	546	YY1AP1	exon-exon	-0.817511	0.0856268	0.57675	no significant	0.354295	0.616832	0.480091	0.207829	0.268492	0.351428
chr5_38523520_38530768_-	hsa_circLIFR_002	hsa_circ_0072309	580	LIFR	exon-exon	-0.817535	0.123889	0.654374	no significant	1.1273	0.803751	1.53629	1.24698	0.652051	0.127792
chr3_56600621_56601081_+	hsa_circCCDC66_007	hsa_circ_0001312	270	CCDC66	exon-exon	-0.819355	0.268317	0.797732	no significant	0.161043	0.168227	0.0800151	0.124698	0.038356	0.063896
chr17_60111147_60112969_-	hsa_circMED13_011	hsa_circ_0004273	344	MED13	exon-exon	-0.827908	0.229185	0.762441	no significant	0.128835	0.112151	0.208039	0.0831317	0.0767119	0.095844
chr8_141749116_141762415_-	hsa_circPTK2_102	hsa_circ_0003171	493	PTK2	exon-exon	-0.831901	0.149167	0.678462	no significant	0.354295	0.224303	0.240045	0.207829	0.153424	0.095844
chr9_14146687_14179779_-	hsa_circNFIB_011	hsa_circ_0086376	363	NFIB	exon-exon	-0.839314	0.119705	0.646151	no significant	0.22546	0.39253	0.480091	0.166263	0.38356	0.095844
chr18_8113483_8143777_+	hsa_circPTPRM_028	hsa_circ_0002872	444	PTPRM	exon-exon	-0.840777	0.203385	0.74027	no significant	0.322086	0.130843	0.240045	0.124698	0.230136	0.031948
chr16_53189837_53191453_+	hsa_circCHD9_007	hsa_circ_0039353	1616	CHD9	exon-exon	-0.841154	0.112098	0.63468	no significant	0.22546	0.411222	0.512097	0.332527	0.0767119	0.255584
chr5_72285253_72286691_+	hsa_circFCHO2_006	hsa_circ_0072954	370	FCHO2	exon-exon	-0.843792	0.170115	0.697601	no significant	0.0966259	0.411222	0.256048	0.166263	0.153424	0.127792
chr1_52959282_52975384_-	hsa_circZCCHC11_017	hsa_circ_0003632	436	ZCCHC11	exon-exon	-0.845963	0.10176	0.612093	no significant	0.22546	0.39253	0.416079	0.207829	0.268492	0.127792
chr12_1289705_1299218_+	hsa_circERC1_014	hsa_circ_0097864	614	ERC1	exon-exon	-0.847721	0.295108	0.804684	no significant	0.161043	0.130843	0.0640121	0.124698	0	0.063896
chr10_86130769_86133571_+	hsa_circFAM190B_001	hsa_circ_0018992	1653	CCSER2	exon-exon	-0.851136	0.246833	0.779134	no significant	0.0966259	0.168227	0.128024	0.124698	0	0.095844
chr15_72338064_72338975_-	hsa_circMYO9A_002	hsa_circ_0006509	911	MYO9A	exon-exon	-0.852841	0.189643	0.719294	no significant	0.22546	0.242995	0.192036	0.124698	0	0.223636
chr9_99220660_99228060_+	hsa_circHABP4_002	hsa_circ_0087630	394	HABP4	exon-exon	-0.855155	0.128218	0.654374	no significant	0.289878	0.336454	0.256048	0.249395	0.19178	0.063896
chrX_19983161_19988416_-	hsa_circCXorf23_003	hsa_circ_0140068	1308	CXorf23	exon-intergenic	-0.857494	0.159111	0.685581	no significant	0.289878	0.280378	0.176033	0.0415659	0.19178	0.15974
chr11_77336007_77336863_-	hsa_circCLNS1A_010	hsa_circ_0000343	210	CLNS1A	exon-exon	-0.862287	0.146839	0.678462	no significant	0.354295	0.149535	0.320061	0.166263	0.153424	0.127792
chr2_24181170_24207701_+	hsa_circUBXN2A_004	hsa_circ_0052967	598	UBXN2A	exon-exon	-0.863083	0.1158	0.637171	no significant	0.611964	0.205611	0.352067	0.124698	0.19178	0.287532
chr3_152132729_152150709_+	hsa_circMBNL1_005	hsa_circ_0001349	375	MBNL1	exon-exon	-0.863606	0.247738	0.779134	no significant	0.0966259	0.242995	0.128024	0.207829	0	0.063896
chr7_104714065_104719410_+	hsa_circMLL5_032	hsa_circ_0081819	751	KMT2E	exon-exon	-0.865154	0.21271	0.745107	no significant	0.0966259	0.186919	0.176033	0.0831317	0.153424	0.031948
chr11_33307958_33350179_+	hsa_circHIPK3_005	hsa_circ_0008887	1223	HIPK3	exon-exon	-0.865681	0.232583	0.76785	no significant	0.257669	0.168227	0.0800151	0.124698	0.038356	0.095844
chr3_52771601_52775515_-	hsa_circNEK4_025	hsa_circ_0001309	429	NEK4	exon-exon	-0.867316	0.174039	0.697601	no significant	0.257669	0.224303	0.144027	0.124698	0.0767119	0.127792
chr20_33057852_33069011_+	hsa_circITCH_051	hsa_circ_0005868	669	ITCH	exon-exon	-0.867718	0.179682	0.704384	no significant	0.289878	0.130843	0.208039	0.124698	0.0767119	0.127792
chr6_144858717_144860579_+	hsa_circUTRN_064	hsa_circ_0001647	286	UTRN	exon-exon	-0.873843	0.156722	0.682817	no significant	0.289878	0.149535	0.384073	0.249395	0.153424	0.063896
chr2_43973004_43992865_+	hsa_circPLEKHH2_014	hsa_circ_0120106	1055	PLEKHH2	exon-exon	-0.874242	0.213837	0.745107	no significant	0.0966259	0.205611	0.208039	0	0.0767119	0.191688
chr15_68434283_68439038_+	hsa_circPIAS1_003	hsa_circ_0008378	359	PIAS1	exon-exon	-0.87575	0.282768	0.80243	no significant	0.128835	0.0560757	0.16003	0.124698	0	0.063896
chr15_85081762_85098301_-	hsa_circUBE2Q2P1_002	hsa_circ_0104778	387	UBE2Q2P1	exon-exon	-0.881071	0.236694	0.770572	no significant	0.0644173	0.168227	0.16003	0.0415659	0.153424	0.031948
chr6_42790533_42797910_+	hsa_circKIAA0240_004	hsa_circ_0076410	1798	GLTSCR1L	exon-exon	-0.888542	0.265422	0.797732	no significant	0.161043	0.0747676	0.128024	0.124698	0.0767119	0
chr1_7837219_7838229_+	hsa_circVAMP3_004	hsa_circ_0006354	211	VAMP3	exon-exon	-0.906326	0.2016	0.736061	no significant	0.386504	0.0934594	0.192036	0.124698	0.19178	0.031948
chr5_73136304_73136585_+	hsa_circRGNEF_014	hsa_circ_0005777	281	ARHGEF28	exon-exon	-0.915757	0.171391	0.697601	no significant	0.48313	0.205611	0.128024	0.207829	0.038356	0.15974
chr6_144808683_144814592_+	hsa_circUTRN_038	hsa_circ_0004826	771	UTRN	exon-exon	-0.939007	0.0967793	0.602659	no significant	0.257669	0.39253	0.272051	0.166263	0.268492	0.063896
chr1_243708811_243736350_-	hsa_circAKT3_047	hsa_circ_0000199	555	AKT3	exon-exon	-0.939843	0.0973993	0.602659	no significant	0.161043	0.803751	0.352067	0.332527	0.19178	0.191688
chr9_4860124_4860901_+	hsa_circRCL1_017	hsa_circ_0007592	777	RCL1	exon-exon	-0.943881	0.13081	0.655176	no significant	0.322086	0.112151	0.416079	0.124698	0.153424	0.15974
chr2_120830753_120836157_+	hsa_circEPB41L5_009	hsa_circ_0001064	518	EPB41L5	exon-exon	-0.945033	0.242548	0.776629	no significant	0.128835	0.186919	0.128024	0.249395	0	0
chr19_13135834_13136366_+	hsa_circNFIX_001	hsa_circ_0005660	532	NFIX	exon-exon	-0.95059	0.124674	0.654374	no significant	0.161043	0.205611	0.320061	0.0831317	0.115068	0.15974
chr2_174819600_174820960_-	hsa_circSP3_001	hsa_circ_0002642	1360	SP3	exon-exon	-0.952883	0.153592	0.678462	no significant	0.128835	0.168227	0.256048	0.0415659	0.153424	0.095844
chr8_gl000196_random_12891_22894_-	NA	NA		not_annotated	intergenic-intergenic	-0.954655	0.185029	0.716479	no significant	0.193252	0.0934594	0.16003	0.0415659	0.115068	0.063896
chr10_12039670_12056183_-	hsa_circUPF2_008	hsa_circ_0000213	699	UPF2	exon-exon	-0.957456	0.236477	0.770572	no significant	0.128835	0.0747676	0.16003	0	0.153424	0.031948
chr10_111883774_111890244_+	hsa_circADD3_014	hsa_circ_0003357	589	ADD3	exon-exon	-0.957627	0.176186	0.697601	no significant	0.22546	0.112151	0.256048	0.166263	0.153424	0
chr13_48651288_48664554_-	hsa_circMED4_003	hsa_circ_0004936	674	MED4	exon-exon	-0.958063	0.194558	0.723881	no significant	0.193252	0.0934594	0.16003	0.124698	0	0.095844
chr17_49278952_49280589_-	hsa_circMBTD1_019	hsa_circ_0107074	485	MBTD1	exon-exon	-0.965543	0.235514	0.770572	no significant	0.0644173	0.112151	0.176033	0.166263	0	0.031948
chr10_105767934_105778666_+	hsa_circSLK_006	hsa_circ_0000259	528	SLK	exon-exon	-0.974316	0.147986	0.678462	no significant	0.128835	0.224303	0.208039	0	0.153424	0.127792
chr9_6880011_6893232_+	hsa_circKDM4C_016	hsa_circ_0001839	292	KDM4C	exon-exon	-0.976427	0.210796	0.745107	no significant	0.0966259	0.130843	0.128024	0	0.038356	0.127792
chr7_131060182_131084192_+	hsa_circMKLN1_013	hsa_circ_0001746	605	MKLN1	exon-exon	-0.978325	0.056483	0.466184	no significant	0.386504	0.485989	0.448085	0.290961	0.345204	0.063896
chr5_170610198_170632616_+	hsa_circRANBP17_043	hsa_circ_0003718	338	RANBP17	exon-exon	-0.981985	0.16118	0.689594	no significant	0.354295	0.130843	0.144027	0.166263	0.038356	0.095844
chr7_128655032_128658211_-	hsa_circTNPO3_005	hsa_circ_0001741	432	TNPO3	exon-exon	-0.9834	0.0679104	0.510199	no significant	0.611964	0.448605	0.240045	0.332527	0.19178	0.127792
chr3_110830876_110866331_+	hsa_circPVRL3_009	hsa_circ_0121449	1130	PVRL3	exon-exon	-0.988484	0.0971253	0.602659	no significant	0.22546	0.261686	0.240045	0.124698	0.0767119	0.15974
chr19_52579296_52592255_-	hsa_circZNF841_010	hsa_circ_0008749	414	ZNF841	exon-exon	-0.989289	0.175824	0.697601	no significant	0.193252	0.168227	0.0960182	0.0415659	0.038356	0.127792
chr1_78183551_78191447_-	hsa_circUSP33_030	hsa_circ_0000087	783	USP33	exon-exon	-0.992659	0.0509792	0.464535	no significant	0.322086	0.373838	0.384073	0.124698	0.153424	0.255584
chr4_106367539_106377902_-	hsa_circPPA2_005	hsa_circ_0007477	284	PPA2	exon-exon	-0.996483	0.153865	0.678462	no significant	0.161043	0.149535	0.144027	0.124698	0.0767119	0.031948
chr12_116674625_116675510_-	hsa_circMED13L_008	hsa_circ_0008151	885	MED13L	intergenic-exon	-1.00493	0.303473	0.804684	no significant	0.161043	0	0.16003	0.124698	0.038356	0
chr10_126097110_126100769_-	hsa_circOAT_001	hsa_circ_0008898	549	OAT	exon-exon	-1.01511	0.155143	0.678462	no significant	0.0966259	0.149535	0.192036	0.124698	0.0767119	0.031948
chr3_169863210_169867032_-	hsa_circPHC3_022	hsa_circ_0001360	258	PHC3	exon-exon	-1.02079	0.0554458	0.464535	no significant	0.386504	0.29907	0.304058	0.124698	0.19178	0.15974
chr14_50175876_50210523_+	hsa_circKLHDC1_005	hsa_circ_0101926	938	KLHDC1	exon-exon	-1.02876	0.133839	0.661853	no significant	0.0966259	0.186919	0.224042	0.124698	0.038356	0.095844
chr3_33725850_33738425_-	hsa_circCLASP2_005	hsa_circ_0001280	449	CLASP2	exon-exon	-1.04532	0.127918	0.654374	no significant	0.418712	0.317762	0.144027	0.0415659	0.345204	0.031948
chr2_110321942_110350696_-	hsa_circSEPT10_005	hsa_circ_0002076	998	SEPT10	exon-exon	-1.0481	0.0600994	0.485769	no significant	0.257669	0.355146	0.288055	0.0831317	0.153424	0.191688
chr3_171965322_172003774_+	hsa_circFNDC3B_031	hsa_circ_0001362	585	FNDC3B	exon-exon	-1.05401	0.12623	0.654374	no significant	0.128835	0.168227	0.304058	0.0831317	0.19178	0.031948
chr4_38828305_38831158_-	hsa_circTLR6_001	hsa_circ_0126251	2853	TLR6	exon-exon	-1.05457	0.137501	0.667532	no significant	0.386504	0.112151	0.208039	0.0415659	0.038356	0.223636
chr1_145594038_145595220_-	hsa_circPOLR3C_017	hsa_circ_0003693	302	POLR3C	exon-exon	-1.05891	0.163797	0.693728	no significant	0.161043	0.149535	0.0960182	0.124698	0.038356	0.031948
chr9_99220660_99233376_+	hsa_circHABP4_003	hsa_circ_0087631	478	HABP4	exon-exon	-1.06231	0.154771	0.678462	no significant	0.193252	0.168227	0.112021	0.0415659	0	0.15974
chr11_102233626_102239279_+	hsa_circBIRC2_003	hsa_circ_0004103	371	BIRC2	exon-exon	-1.07588	0.101097	0.612093	no significant	0.161043	0.355146	0.176033	0.166263	0.038356	0.127792
chr15_41988272_41991357_+	hsa_circMGA_010	hsa_circ_0000592	1124	MGA	exon-exon	-1.0775	0.102483	0.612093	no significant	0.386504	0.149535	0.208039	0.0831317	0.19178	0.063896
chr12_70193988_70195501_+	hsa_circRAB3IP_008	hsa_circ_0000419	242	RAB3IP	exon-exon	-1.07874	0.110488	0.63468	no significant	0.128835	0.29907	0.176033	0.0415659	0.0767119	0.15974
chr13_99890680_99896878_+	hsa_circUBAC2_003	hsa_circ_0030720	358	UBAC2	exon-exon	-1.0844	0.0549308	0.464535	no significant	0.354295	0.317762	0.288055	0.124698	0.268492	0.063896
chr5_87516379_87541609_-	hsa_circTMEM161B_002	hsa_circ_0005476	5319	TMEM161B	exon-intergenic	-1.08914	0.103408	0.612093	no significant	0.22546	0.224303	0.192036	0.207829	0	0.095844
chr8_133634856_133673873_-	hsa_circLRRC6_005	hsa_circ_0135795	904	LRRC6	exon-exon	-1.09369	0.0546471	0.464535	no significant	0.354295	0.242995	0.288055	0.124698	0.153424	0.127792
chr8_116631358_116635985_-	hsa_circTRPS1_001	hsa_circ_0006950	1087	TRPS1	exon-exon	-1.10058	0.137835	0.667532	no significant	0.22546	0.261686	0.0800151	0	0.115068	0.127792
chr7_72301271_72304508_+	NA	NA		SBDSP1	exon-exon	-1.112	0.136608	0.667102	no significant	0.0644173	0.168227	0.224042	0.124698	0	0.095844
chr10_13169744_13178897_+	hsa_circOPTN_011	hsa_circ_0007242	523	OPTN	exon-exon	-1.11887	0.0625747	0.492199	no significant	0.257669	0.317762	0.224042	0.0415659	0.153424	0.15974
chr10_75234676_75239275_-	hsa_circPPP3CB_001	hsa_circ_0094159	492	PPP3CB	exon-exon	-1.12705	0.22487	0.762441	no significant	0	0.149535	0.144027	0	0	0.127792
chr8_116616099_116635985_-	hsa_circTRPS1_002	hsa_circ_0085363	2217	TRPS1	exon-exon	-1.13962	0.0709759	0.523168	no significant	0.22546	0.355146	0.224042	0	0.230136	0.127792
chr18_55398645_55399255_+	hsa_circRP11-35G9.3_001	hsa_circ_0108698	610	not_annotated	intergenic-intergenic	-1.14488	0.0703298	0.521687	no significant	0.354295	0.261686	0.240045	0.166263	0.230136	0
chr11_18312988_18314523_-	hsa_circHPS5_018	hsa_circ_0000280	656	HPS5	exon-exon	-1.16774	0.0618897	0.490099	no significant	0.322086	0.280378	0.176033	0.124698	0.153424	0.063896
chr2_180036846_180056593_-	hsa_circSESTD1_004	hsa_circ_0002087	394	SESTD1	exon-exon	-1.17409	0.0957072	0.602659	no significant	0.161043	0.149535	0.192036	0.124698	0	0.095844
chr5_135483520_135489852_+	hsa_circSMAD5_003	hsa_circ_0007930	731	SMAD5	exon-exon	-1.1785	0.0736523	0.532843	no significant	0.193252	0.149535	0.400076	0.124698	0.153424	0.063896
chr11_89088129_89135710_-	hsa_circNOX4_012	hsa_circ_0023982	588	NOX4	exon-exon	-1.1963	0.0903443	0.589605	no significant	0.0966259	0.504681	0.336064	0.0415659	0	0.351428
chr5_64863339_64868113_+	hsa_circPPWD1_003	hsa_circ_0072697	773	PPWD1	exon-exon	-1.20009	0.132867	0.661853	no significant	0.0322086	0.59814	0.128024	0.0831317	0.230136	0.031948
chr4_103644027_103647840_-	hsa_circMANBA_012	hsa_circ_0006007	372	MANBA	exon-exon	-1.20488	0.192549	0.721556	no significant	0.128835	0.0373838	0.192036	0.166263	0	0
chr8_gl000196_random_12891_27060_-	NA	NA		not_annotated	intergenic-intergenic	-1.20623	0.136299	0.667102	no significant	0.289878	0.0747676	0.112021	0.124698	0.038356	0.031948
chr15_65266939_65275931_-	hsa_circSPG21_006	hsa_circ_0003526	476	SPG21	exon-exon	-1.21633	0.052062	0.464535	no significant	0.22546	0.242995	0.224042	0.124698	0.0767119	0.095844
chr14_33684387_33684793_+	hsa_circNPAS3_009	hsa_circ_0101677	296	NPAS3	exon-exon	-1.22281	0.104279	0.614145	no significant	0.161043	0.242995	0.112021	0.0415659	0	0.15974
chr4_62800557_62863983_+	hsa_circLPHN3_038	hsa_circ_0126761	1283	LPHN3	exon-exon	-1.2491	0.0848906	0.57675	no significant	0.193252	0.355146	0.176033	0.290961	0	0.031948
chr22_45574118_45574781_+	hsa_circNUP50_001	hsa_circ_0002077	663	NUP50	exon-exon	-1.25376	0.084112	0.57675	no significant	0.161043	0.149535	0.144027	0.0415659	0.115068	0.031948
chr12_42604156_42604482_-	hsa_circYAF2_002	hsa_circ_0000392	326	YAF2	intergenic-intergenic	-1.28988	0.113812	0.637171	no significant	0.161043	0.130843	0.0960182	0.0415659	0.115068	0
chr1_204082042_204083733_+	hsa_circSOX13_002	hsa_circ_0004777	419	SOX13	exon-exon	-1.38	0.052929	0.464535	no significant	0.193252	0.242995	0.16003	0.0831317	0.153424	0
chr2_24362239_24369956_+	hsa_circLOC375190_009	hsa_circ_0008073	326	FAM228B	exon-exon	-1.38442	0.0956991	0.602659	no significant	0.0966259	0.149535	0.144027	0	0.153424	0
chr2_24733837_24807429_+	hsa_circNCOA1_004	hsa_circ_0006934	73592	NCOA1	intergenic-exon	-1.45834	0.0549369	0.464535	no significant	0.193252	0.242995	0.0960182	0.0415659	0.115068	0.031948
chr19_4511918_4512215_-	NA	NA		PLIN4	exon-exon	-1.58229	0.084078	0.57675	no significant	0.611964	0.485989	0	0.332527	0.038356	0
chr20_46252654_46262380_+	hsa_circNCOA3_008	hsa_circ_0001165	881	NCOA3	exon-exon	-1.68477	0.0507945	0.464535	no significant	0.128835	0.130843	0.112021	0	0	0.095844
chr6_131276244_131277639_-	hsa_circEPB41L2_001	hsa_circ_0001640	719	EPB41L2	exon-exon	-0.821307	0.0455452	0.452364	down	0.93405	1.27105	1.13621	0.581922	0.690407	0.63896
chr10_32832227_32873232_+	hsa_circCCDC7_022	hsa_circ_0000233	10337	CCDC7	exon-exon	-0.832458	0.0498803	0.464535	down	1.70706	1.30843	0.912173	0.665054	0.652051	0.862596
chr6_131247744_131277639_-	hsa_circEPB41L2_002	hsa_circ_0077837	824	EPB41L2	exon-exon	-0.903964	0.0428144	0.439916	down	2.67332	2.84117	1.87235	0.70662	1.03561	2.17246
chr1_172109619_172113577_-	hsa_circDNM3OS_001	hsa_circ_0005230	3958	DNM3OS	exon-exon	-0.934074	0.045309	0.452364	down	1.90031	1.66358	0.880167	0.415659	0.652051	1.21402
chr7_23650789_23651172_+	hsa_circCCDC126_004	hsa_circ_0001684	383	CCDC126	exon-exon	-0.970323	0.0400116	0.439916	down	0.644173	0.747676	0.432082	0.415659	0.230136	0.287532
chr1_41536266_41541123_-	hsa_circSCMH1_023	hsa_circ_0000061	360	SCMH1	exon-exon	-0.999468	0.0207409	0.347541	down	1.35276	1.32712	1.23223	0.914449	0.728763	0.351428
chr16_53175090_53191453_+	hsa_circCHD9_003	hsa_circ_0105527	16363	CHD9	intergenic-exon	-1.02809	0.0151994	0.323886	down	1.19172	1.21497	1.02419	0.374093	0.728763	0.575064
chr10_32854485_32873232_+	hsa_circCCDC7_026	hsa_circ_0008679	10196	CCDC7	exon-exon	-1.03258	0.0355252	0.420561	down	0.611964	0.485989	0.68813	0.0831317	0.460272	0.31948
chr14_35020919_35024118_-	hsa_circ_chr14_00334	hsa_circ_0007379	3199	not_annotated	intergenic-intergenic	-1.10147	0.0413747	0.439916	down	0.611964	0.672908	0.240045	0.124698	0.345204	0.223636
chr11_89165951_89185063_-	hsa_circNOX4_002	hsa_circ_0023990	395	NOX4	exon-exon	-1.11882	0.0493072	0.464535	down	0.22546	0.467297	0.752142	0.249395	0.038356	0.383376
chr1_185183638_185200840_+	hsa_circSWT1_037	hsa_circ_0004689	469	SWT1	exon-exon	-1.12021	0.0343334	0.420561	down	0.257669	0.878519	0.992188	0.290961	0.536983	0.191688
chr2_24357988_24369956_+	hsa_circLOC375190_005	hsa_circ_0000982	587	FAM228B	exon-exon	-1.14206	0.00698537	0.215444	down	1.80368	1.64489	2.00038	1.24698	0.690407	0.575064
chr3_183361267_183369064_+	hsa_circKLHL24_003	hsa_circ_0001367	1044	KLHL24	exon-exon	-1.15338	0.0412163	0.439916	down	0.322086	0.317762	0.272051	0.166263	0.0767119	0.15974
chr6_73005639_73043538_+	hsa_circRIMS1_046	hsa_circ_0132246	546	RIMS1	intergenic-exon	-1.15783	0.0248608	0.363773	down	0.386504	0.504681	0.400076	0.166263	0.0767119	0.31948
chr22_32874967_32875262_+	hsa_circFBXO7_006	hsa_circ_0008832	295	FBXO7	exon-exon	-1.15832	0.0120388	0.293948	down	0.837425	0.59814	0.800151	0.249395	0.498628	0.255584
chr7_24663284_24690331_+	hsa_circMPP6_020	hsa_circ_0001685	653	MPP6	exon-exon	-1.17019	0.0294345	0.391099	down	0.547547	0.504681	0.496094	0.249395	0	0.415324
chr6_107824860_107827631_+	hsa_circSOBP_002	hsa_circ_0001633	325	SOBP	exon-exon	-1.17476	0.0246869	0.363773	down	0.386504	0.523373	0.352067	0.332527	0.115068	0.127792
chrX_79544404_79565732_-	hsa_circTCONS_l2_00030834_002	hsa_circ_0140637	562	CHMP1B2P	exon-exon	-1.20154	0.0308363	0.401557	down	0.354295	0.336454	0.640121	0.0415659	0.38356	0.15974
chr1_236969443_236979843_+	hsa_circMTR_011	hsa_circ_0004039	515	MTR	exon-exon	-1.22867	0.0312205	0.402093	down	0.289878	0.411222	0.256048	0.124698	0.19178	0.095844
chr1_58971731_59004982_-	hsa_circOMA1_006	hsa_circ_0002316	1381	OMA1	exon-exon	-1.24206	0.0260725	0.363773	down	0.161043	0.429913	0.496094	0.124698	0.19178	0.15974
chr19_22157530_22171711_-	hsa_circZNF208_001	hsa_circ_0109301	302	ZNF208	exon-exon	-1.26575	0.035259	0.420561	down	0.450921	0.485989	0.16003	0.207829	0.0767119	0.15974
chr3_133907680_133914026_-	hsa_circRYK_013	hsa_circ_0005768	323	RYK	exon-exon	-1.28401	0.0155949	0.326379	down	0.386504	0.336454	0.432082	0.124698	0.0767119	0.255584
chr8_17601112_17613470_-	hsa_circMTUS1_002	hsa_circ_0083444	2441	MTUS1	exon-exon	-1.28932	0.0187894	0.34408	down	0.450921	0.261686	0.384073	0.0831317	0.153424	0.191688
chr6_151669845_151674887_+	hsa_circAKAP12_002	hsa_circ_0078299	5042	AKAP12	exon-exon	-1.29009	0.0342574	0.420561	down	0.676381	0.280378	0.304058	0.374093	0.115068	0.031948
chr2_148653869_148657467_+	hsa_circACVR2A_005	hsa_circ_0001073	473	ACVR2A	exon-exon	-1.29279	0.0062184	0.214352	down	0.611964	0.747676	0.736139	0.457225	0.268492	0.15974
chr1_243776972_244006584_-	hsa_circAKT3_009	hsa_circ_0017252	808	AKT3	exon-exon	-1.32227	0.0216727	0.357753	down	0.193252	0.654216	0.336064	0.207829	0.19178	0.095844
chr11_103173821_103194718_+	hsa_circDYNC2H1_056	hsa_circ_0024143	944	DYNC2H1	exon-exon	-1.3323	0.040038	0.439916	down	0.257669	0.224303	0.36807	0.124698	0.230136	0
chr11_72695132_72700142_-	hsa_circFCHSD2_008	hsa_circ_0005918	318	FCHSD2	exon-exon	-1.39983	0.0100895	0.257063	down	0.354295	0.355146	0.5281	0.166263	0.038356	0.255584
chr5_131013395_131044965_-	hsa_circFNIP1_023	hsa_circ_0001524	813	FNIP1	exon-exon	-1.40002	0.0186229	0.34408	down	0.354295	0.280378	0.272051	0.166263	0.115068	0.063896
chr1_114372213_114377061_-	hsa_circPTPN22_005	hsa_circ_0000110	356	PTPN22	exon-exon	-1.42771	0.017884	0.34408	down	0.257669	0.280378	0.512097	0	0.153424	0.223636
chr14_31596990_31602881_-	hsa_circHECTD1_058	hsa_circ_0002301	1403	HECTD1	exon-exon	-1.44944	0.022081	0.35943	down	0.48313	0.242995	0.240045	0.124698	0.19178	0.031948
chr4_52729602_52758017_+	hsa_circDCUN1D4_014	hsa_circ_0007646	481	DCUN1D4	exon-exon	-1.47404	0.00469704	0.172029	down	0.515338	0.616832	0.400076	0.0415659	0.268492	0.223636
chr7_33388679_33427756_+	hsa_circBBS9_031	hsa_circ_0079812	786	BBS9	exon-exon	-1.48146	0.0335841	0.420561	down	0.257669	0.205611	0.176033	0.0831317	0	0.127792
chr7_104702610_104722244_+	hsa_circMLL5_020	hsa_circ_0132875	1287	KMT2E	exon-exon	-1.48329	0.0259337	0.363773	down	0.0966259	0.317762	0.384073	0.0831317	0.153424	0.063896
chr11_89133184_89135710_-	hsa_circNOX4_010	hsa_circ_0023984	445	NOX4	exon-exon	-1.4853	0.001418	0.118707	down	0.740799	1.70096	1.16822	0.332527	0.38356	0.575064
chr1_741178_745550_-	hsa_circTCONS_l2_00000968_001	hsa_circ_0002333	247	not_annotated	intergenic-intergenic	-1.52675	0.00278493	0.142608	down	0.547547	0.467297	0.68813	0.124698	0.345204	0.127792
chr16_53288349_53308214_+	hsa_circCHD9_043	hsa_circ_0000702	1106	CHD9	exon-exon	-1.53434	0.0044948	0.169932	down	0.418712	0.355146	0.416079	0.0831317	0.230136	0.095844
chr1_243708811_244006584_-	hsa_circAKT3_012	hsa_circ_0017242	1363	AKT3	exon-exon	-1.54195	0.0127763	0.296096	down	0.644173	0.280378	0.288055	0.124698	0	0.255584
chr4_62800557_62910267_+	hsa_circLPHN3_039	hsa_circ_0069865	1702	LPHN3	exon-exon	-1.54644	0.0256097	0.363773	down	0.22546	0.29907	0.256048	0.249395	0.038356	0
chr17_60061531_60062451_-	hsa_circMED13_050	hsa_circ_0002220	503	MED13	exon-exon	-1.55466	0.0414082	0.439916	down	0.0966259	0.168227	0.256048	0	0.038356	0.127792
chr2_190593385_190609514_+	hsa_circANKAR_019	hsa_circ_0005644	1026	ANKAR	exon-exon	-1.57861	0.0195495	0.347153	down	0.418712	0.186919	0.208039	0.0415659	0.0767119	0.127792
chr10_49609654_49618211_+	hsa_circMAPK8_007	hsa_circ_0002968	499	MAPK8	exon-exon	-1.6305	0.00168372	0.129526	down	0.611964	0.504681	0.416079	0.249395	0.153424	0.095844
chr17_67124759_67130883_-	hsa_circABCA6_004	hsa_circ_0107583	659	ABCA6	exon-exon	-1.65047	0.0476831	0.464535	down	0.193252	0.0934594	0.208039	0.166263	0	0
chr11_89155069_89185063_-	hsa_circNOX4_003	hsa_circ_0023988	476	NOX4	exon-exon	-1.67113	0.00390929	0.160903	down	0.354295	0.766367	0.656124	0	0.115068	0.415324
chr4_87685745_87689129_+	hsa_circPTPN13_051	hsa_circ_0007948	487	PTPN13	exon-exon	-1.72464	0.00718113	0.215802	down	0.128835	0.429913	0.384073	0.0831317	0.0767119	0.127792
chr4_87614739_87622954_+	hsa_circPTPN13_015	hsa_circ_0007263	649	PTPN13	exon-exon	-1.72553	0.0267675	0.369076	down	0.386504	0.317762	0.0960182	0.207829	0.038356	0
chr3_169694733_169706147_+	hsa_circSEC62_006	hsa_circ_0001358	585	SEC62	exon-exon	-1.73412	0.00661902	0.215444	down	0.322086	0.355146	0.208039	0.0831317	0.0767119	0.095844
chr3_112968568_112969680_+	hsa_circBOC_002	hsa_circ_0007897	457	BOC	exon-exon	-1.73777	0.0238598	0.363773	down	0.0644173	0.29907	0.240045	0.124698	0	0.063896
chr9_87317073_87325706_+	hsa_circNTRK2_005	hsa_circ_0139142	371	NTRK2	exon-exon	-1.7403	0.00293293	0.143225	down	0.418712	0.579449	0.272051	0.166263	0.19178	0.031948
chr9_111812562_111812972_-	hsa_circC9orf5_067	hsa_circ_0087905	269	TMEM245	exon-exon	-1.8032	0.0246756	0.363773	down	0.257669	0.205611	0.0960182	0	0.115068	0.031948
chr1_171537385_171544267_+	hsa_circPRRC2C_047	hsa_circ_0004412	397	PRRC2C	exon-exon	-1.82324	0.017787	0.34408	down	0.128835	0.261686	0.144027	0.0831317	0.038356	0.031948
chr4_48371865_48396670_+	hsa_circSLAIN2_004	hsa_circ_0126526	11840	SLAIN2	exon-intergenic	-1.83549	0.00834052	0.227843	down	0.22546	0.261686	0.192036	0.0415659	0.0767119	0.063896
chr3_3197902_3215945_-	hsa_circCRBN_007	hsa_circ_0003400	576	CRBN	exon-exon	-1.85921	0.0204953	0.347541	down	0.257669	0.0934594	0.224042	0.124698	0	0.031948
chr1_215749243_215752480_+	hsa_circKCTD3_003	hsa_circ_0000184	352	KCTD3	exon-exon	-1.8765	0.0296995	0.391099	down	0.0966259	0.130843	0.192036	0.124698	0	0
chr13_61013821_61041513_+	hsa_circTDRD3_004	hsa_circ_0003441	454	TDRD3	exon-exon	-1.9296	0.00092381	0.0902255	down	0.805216	0.654216	0.272051	0.0415659	0.230136	0.15974
chr4_103225473_103236987_-	hsa_circSLC39A8_007	hsa_circ_0002782	621	SLC39A8	exon-exon	-1.93087	0.00183964	0.129526	down	0.289878	0.579449	0.272051	0.166263	0.0767119	0.063896
chr6_144858717_144864006_+	hsa_circUTRN_065	hsa_circ_0130908	362	UTRN	exon-exon	-2.1886	0.0082361	0.227843	down	0.289878	0.130843	0.144027	0	0.0767119	0.031948
chr19_4511522_4511918_-	NA	hsa_circ_0141442		PLIN4	exon-exon	-2.19795	0.00219944	0.135671	down	0.837425	0.224303	0.416079	0.332527	0	0
chr8_17570722_17581342_-	hsa_circMTUS1_004	hsa_circ_0083443	336	MTUS1	exon-exon	-2.33385	0.00319975	0.150004	down	0.193252	0.242995	0.16003	0.0831317	0	0.031948
chr5_102432244_102433485_-	hsa_circGIN1_005	hsa_circ_0006499	655	GIN1	exon-exon	-2.66371	0.00194529	0.129526	down	0.193252	0.186919	0.144027	0.0415659	0	0.031948
chr1_154207066_154207767_+	hsa_circUBAP2L_011	hsa_circ_0110845	298	UBAP2L	exon-exon	-3.11403	0.00266338	0.142608	down	0.161043	0.130843	0.112021	0.0415659	0	0
chr9_14120438_14179779_-	hsa_circNFIB_012	hsa_circ_0138300	683	NFIB	exon-exon	-3.14645	0.000222536	0.0326016	down	0.322086	0.242995	0.176033	0	0	0.063896
chr10_34558584_34573173_-	hsa_circPARD3_036	hsa_circ_0018168	354	PARD3	exon-exon	-3.16859	0.00198931	0.129526	down	0.128835	0.149535	0.128024	0	0.038356	0
chr3_100565215_100581229_-	hsa_circABI3BP_001	hsa_circ_0121334	513	ABI3BP	exon-exon	-3.40418	1.52786e-08	8.95327e-06	down	1.90031	1.96265	0.592112	0.249395	0.0767119	0.095844
chr3_100565215_100570784_-	NA	NA		ABI3BP	exon-exon	-4.18473	2.67227e-10	3.1319e-07	down	1.61043	1.40189	0.544103	0.124698	0	0.063896
chr17_58012553_58018304_+	NA	NA		RPS6KB1	exon-exon	-5.59089	4.02623e-05	0.00786456	down	0.128835	0.149535	0.176033	0	0	0

## Sheet: GO BP
databaseID	Description	type	geneRatio	bgRatio	pvalue	padj	qvalue	enrichScore	overlapGeneList	overlapGeneCount
GO:0018105	peptidyl-serine phosphorylation	biological process	7/90	231/17913	0.000163175	0.155076	0.138094	6.03131	DYRK1A/LMTK2/MAPKAP1/MAPK8/RPS6KB1/FNIP1/NTRK2	7
GO:0021953	central nervous system neuron differentiation	biological process	6/90	177/17913	0.00026794	0.155076	0.138094	6.74689	SATB2/PTK2/DYNC2H1/RYK/NFIB/NTRK2	6
GO:0018209	peptidyl-serine modification	biological process	7/90	252/17913	0.000277748	0.155076	0.138094	5.5287	DYRK1A/LMTK2/MAPKAP1/MAPK8/RPS6KB1/FNIP1/NTRK2	7
GO:0043087	regulation of GTPase activity	biological process	8/90	410/17913	0.00106169	0.242061	0.215554	3.88358	DOCK1/ARHGEF12/FGD6/MYO9B/ASAP1/DLC1/PTK2/NTRK2	8
GO:0071679	commissural neuron axon guidance	biological process	2/90	11/17913	0.00133315	0.242061	0.215554	36.1879	RYK/NFIB	2
GO:0022604	regulation of cell morphogenesis	biological process	8/90	430/17913	0.00143747	0.242061	0.215554	3.70295	ZRANB1/DOCK1/FGD6/DLC1/PTK2/RYK/RIMS1/NTRK2	8
GO:0048934	peripheral nervous system neuron differentiation	biological process	2/90	12/17913	0.00159455	0.242061	0.215554	33.1722	RUNX1/NTRK2	2
GO:0048935	peripheral nervous system neuron development	biological process	2/90	12/17913	0.00159455	0.242061	0.215554	33.1722	RUNX1/NTRK2	2
GO:0061564	axon development	biological process	8/90	438/17913	0.00161458	0.242061	0.215554	3.63531	APBB2/PTK2/MTR/PARD3/BOC/RYK/NFIB/NTRK2	8
GO:0018107	peptidyl-threonine phosphorylation	biological process	4/90	101/17913	0.00167828	0.242061	0.215554	7.88251	DYRK1A/LMTK2/PARD3/MAPK8	4
GO:0031113	regulation of microtubule polymerization	biological process	3/90	47/17913	0.00169496	0.242061	0.215554	12.7043	CLIP1/DYRK1A/SLAIN2	3
GO:0043374	CD8-positive, alpha-beta T cell differentiation	biological process	2/90	13/17913	0.00187832	0.242061	0.215554	30.6205	RUNX1/SATB1	2
GO:0018212	peptidyl-tyrosine modification	biological process	7/90	349/17913	0.00187868	0.242061	0.215554	3.99207	DYRK1A/TPST1/LMTK2/PTK2/NOX4/RYK/NTRK2	7
GO:0018210	peptidyl-threonine modification	biological process	4/90	109/17913	0.00221826	0.265399	0.236337	7.30398	DYRK1A/LMTK2/PARD3/MAPK8	4
GO:0080182	histone H3-K4 trimethylation	biological process	2/90	15/17913	0.00251205	0.280512	0.249794	26.5378	TET2/KMT2E	2
GO:2000811	negative regulation of anoikis	biological process	2/90	17/17913	0.00323252	0.301128	0.268153	23.4157	PTK2/NTRK2	2
GO:0010810	regulation of cell-substrate adhesion	biological process	5/90	201/17913	0.0034405	0.301128	0.268153	4.95108	DOCK1/DLC1/PTK2/ABI3BP/UTRN	5
GO:0035023	regulation of Rho protein signal transduction	biological process	4/90	124/17913	0.00353361	0.301128	0.268153	6.42043	ARHGEF12/FGD6/MYO9B/DLC1	4
GO:0007409	axonogenesis	biological process	7/90	393/17913	0.00363816	0.301128	0.268153	3.54512	APBB2/PTK2/PARD3/BOC/RYK/NFIB/NTRK2	7
GO:0048667	cell morphogenesis involved in neuron differentiation	biological process	8/90	500/17913	0.00364999	0.301128	0.268153	3.18453	KIDINS220/APBB2/PTK2/PARD3/BOC/RYK/NFIB/NTRK2	8
GO:0034599	cellular response to oxidative stress	biological process	6/90	296/17913	0.00377534	0.301128	0.268153	4.03446	MAPKAP1/ERCC6L2/MTR/MAPK8/NOX4/FBXO7	6
GO:0007411	axon guidance	biological process	5/90	210/17913	0.00414408	0.301599	0.268572	4.73889	APBB2/PTK2/BOC/RYK/NFIB	5
GO:0097485	neuron projection guidance	biological process	5/90	212/17913	0.00431342	0.301599	0.268572	4.69418	APBB2/PTK2/BOC/RYK/NFIB	5
GO:0046785	microtubule polymerization	biological process	3/90	66/17913	0.00446622	0.301599	0.268572	9.04697	CLIP1/DYRK1A/SLAIN2	3
GO:0046578	regulation of Ras protein signal transduction	biological process	5/90	215/17913	0.00457662	0.301599	0.268572	4.62868	ARHGEF12/FGD6/MYO9B/DLC1/MAPKAP1	5
GO:1902903	regulation of supramolecular fiber organization	biological process	6/90	313/17913	0.00494727	0.301599	0.268572	3.81534	CLIP1/DYRK1A/DLC1/FCHSD2/NOX4/SLAIN2	6
GO:0007422	peripheral nervous system development	biological process	3/90	69/17913	0.00505875	0.301599	0.268572	8.65362	RUNX1/PARD3/NTRK2	3
GO:0031110	regulation of microtubule polymerization or depolymerization	biological process	3/90	69/17913	0.00505875	0.301599	0.268572	8.65362	CLIP1/DYRK1A/SLAIN2	3
GO:0036037	CD8-positive, alpha-beta T cell activation	biological process	2/90	22/17913	0.00540177	0.301599	0.268572	18.0939	RUNX1/SATB1	2
GO:0071425	hematopoietic stem cell proliferation	biological process	2/90	22/17913	0.00540177	0.301599	0.268572	18.0939	ETV6/RUNX1	2
GO:0051151	negative regulation of smooth muscle cell differentiation	biological process	2/90	23/17913	0.00589699	0.305296	0.271864	17.3072	NFATC1/ANKRD17	2
GO:0071560	cellular response to transforming growth factor beta stimulus	biological process	5/90	233/17913	0.00640128	0.305296	0.271864	4.2711	TRIM33/SNX25/PTK2/PARD3/NOX4	5
GO:2000209	regulation of anoikis	biological process	2/90	24/17913	0.00641217	0.305296	0.271864	16.5861	PTK2/NTRK2	2
GO:0021954	central nervous system neuron development	biological process	3/90	76/17913	0.00661882	0.305296	0.271864	7.85658	PTK2/NFIB/NTRK2	3
GO:1900739	regulation of protein insertion into mitochondrial membrane involved in apoptotic signaling pathway	biological process	2/90	25/17913	0.00694711	0.305296	0.271864	15.9227	PPP3CC/MAPK8	2
GO:1900740	positive regulation of protein insertion into mitochondrial membrane involved in apoptotic signaling pathway	biological process	2/90	25/17913	0.00694711	0.305296	0.271864	15.9227	PPP3CC/MAPK8	2
GO:0071559	response to transforming growth factor beta	biological process	5/90	239/17913	0.00710908	0.305296	0.271864	4.16388	TRIM33/SNX25/PTK2/PARD3/NOX4	5
GO:0001764	neuron migration	biological process	4/90	152/17913	0.00724146	0.305296	0.271864	5.23772	SATB2/APBB2/PTK2/NTRK2	4
GO:0022011	myelination in peripheral nervous system	biological process	2/90	26/17913	0.00750159	0.305296	0.271864	15.3103	PARD3/NTRK2	2
GO:0032292	peripheral nervous system axon ensheathment	biological process	2/90	26/17913	0.00750159	0.305296	0.271864	15.3103	PARD3/NTRK2	2
GO:0018108	peptidyl-tyrosine phosphorylation	biological process	6/90	346/17913	0.00795701	0.305296	0.271864	3.45145	DYRK1A/LMTK2/PTK2/NOX4/RYK/NTRK2	6
GO:0010975	regulation of neuron projection development	biological process	7/90	458/17913	0.00824481	0.305296	0.271864	3.04199	KIDINS220/ASAP1/PTK2/FBXO7/RYK/RIMS1/NTRK2	7
GO:0010507	negative regulation of autophagy	biological process	3/90	83/17913	0.0084359	0.305296	0.271864	7.19398	FOXK2/PTK2/PTPN22	3
GO:0007266	Rho protein signal transduction	biological process	4/90	159/17913	0.00845922	0.305296	0.271864	5.00713	ARHGEF12/FGD6/MYO9B/DLC1	4
GO:0048015	phosphatidylinositol-mediated signaling	biological process	4/90	160/17913	0.00864346	0.305296	0.271864	4.97583	PTK2/RPS6KB1/PTPN13/NTRK2	4
GO:0031116	positive regulation of microtubule polymerization	biological process	2/90	28/17913	0.00866839	0.305296	0.271864	14.2167	CLIP1/SLAIN2	2
GO:0050855	regulation of B cell receptor signaling pathway	biological process	2/90	28/17913	0.00866839	0.305296	0.271864	14.2167	RUNX1/PTPN22	2
GO:0048017	inositol lipid-mediated signaling	biological process	4/90	163/17913	0.00921187	0.305296	0.271864	4.88425	PTK2/RPS6KB1/PTPN13/NTRK2	4
GO:0001844	protein insertion into mitochondrial membrane involved in apoptotic signaling pathway	biological process	2/90	29/17913	0.00928029	0.305296	0.271864	13.7264	PPP3CC/MAPK8	2
GO:0014044	Schwann cell development	biological process	2/90	29/17913	0.00928029	0.305296	0.271864	13.7264	PARD3/NTRK2	2
GO:0033138	positive regulation of peptidyl-serine phosphorylation	biological process	3/90	86/17913	0.00929557	0.305296	0.271864	6.94302	MAPKAP1/FNIP1/NTRK2	3
GO:0051493	regulation of cytoskeleton organization	biological process	7/90	472/17913	0.0096371	0.310426	0.276433	2.95177	CLIP1/DYRK1A/DLC1/PTK2/FCHSD2/NOX4/SLAIN2	7
GO:1901888	regulation of cell junction assembly	biological process	3/90	90/17913	0.0105188	0.314631	0.280177	6.63444	RUNX1/DLC1/PTK2	3
GO:0051204	protein insertion into mitochondrial membrane	biological process	2/90	31/17913	0.0105601	0.314631	0.280177	12.8409	PPP3CC/MAPK8	2
GO:0030900	forebrain development	biological process	6/90	371/17913	0.0109866	0.314631	0.280177	3.21887	SATB2/DLC1/DYNC2H1/RYK/NFIB/NTRK2	6
GO:0031112	positive regulation of microtubule polymerization or depolymerization	biological process	2/90	32/17913	0.0112276	0.314631	0.280177	12.4396	CLIP1/SLAIN2	2
GO:0010821	regulation of mitochondrion organization	biological process	4/90	175/17913	0.0117281	0.314631	0.280177	4.54933	PPP3CC/OMA1/MAPK8/FBXO7	4
GO:0031109	microtubule polymerization or depolymerization	biological process	3/90	94/17913	0.0118312	0.314631	0.280177	6.35213	CLIP1/DYRK1A/SLAIN2	3
GO:0021955	central nervous system neuron axonogenesis	biological process	2/90	34/17913	0.0126169	0.314631	0.280177	11.7078	PTK2/NFIB	2
GO:0043276	anoikis	biological process	2/90	34/17913	0.0126169	0.314631	0.280177	11.7078	PTK2/NTRK2	2
GO:1901030	positive regulation of mitochondrial outer membrane permeabilization involved in apoptotic signaling pathway	biological process	2/90	34/17913	0.0126169	0.314631	0.280177	11.7078	PPP3CC/MAPK8	2
GO:0032271	regulation of protein polymerization	biological process	4/90	180/17913	0.0128947	0.314631	0.280177	4.42296	CLIP1/DYRK1A/FCHSD2/SLAIN2	4
GO:0007179	transforming growth factor beta receptor signaling pathway	biological process	4/90	184/17913	0.0138797	0.314631	0.280177	4.32681	TRIM33/SNX25/PTK2/PARD3	4
GO:1902905	positive regulation of supramolecular fiber organization	biological process	4/90	185/17913	0.0141332	0.314631	0.280177	4.30342	CLIP1/FCHSD2/NOX4/SLAIN2	4
GO:0014037	Schwann cell differentiation	biological process	2/90	37/17913	0.0148334	0.314631	0.280177	10.7586	PARD3/NTRK2	2
GO:0090150	establishment of protein localization to membrane	biological process	5/90	287/17913	0.0148397	0.314631	0.280177	3.46748	CLIP1/PPP3CC/PARD3/MAPK8/SEC62	5
GO:0000096	sulfur amino acid metabolic process	biological process	2/90	39/17913	0.0163973	0.314631	0.280177	10.2068	MTR/NOX4	2
GO:0038179	neurotrophin signaling pathway	biological process	2/90	39/17913	0.0163973	0.314631	0.280177	10.2068	KIDINS220/NTRK2	2
GO:0043254	regulation of protein complex assembly	biological process	6/90	409/17913	0.0170397	0.314631	0.280177	2.9198	CLIP1/DYRK1A/FCHSD2/CRBN/SLAIN2/FNIP1	6
GO:0010811	positive regulation of cell-substrate adhesion	biological process	3/90	110/17913	0.0179903	0.314631	0.280177	5.42818	DOCK1/ABI3BP/UTRN	3
GO:0033173	calcineurin-NFAT signaling cascade	biological process	2/90	41/17913	0.0180285	0.314631	0.280177	9.70894	NFATC1/PPP3CC	2
GO:2000649	regulation of sodium ion transmembrane transporter activity	biological process	2/90	41/17913	0.0180285	0.314631	0.280177	9.70894	KLHL24/UTRN	2
GO:0014047	glutamate secretion	biological process	2/90	42/17913	0.0188688	0.314631	0.280177	9.47778	RIMS1/NTRK2	2
GO:0018023	peptidyl-lysine trimethylation	biological process	2/90	42/17913	0.0188688	0.314631	0.280177	9.47778	TET2/KMT2E	2
GO:0061512	protein localization to cilium	biological process	2/90	42/17913	0.0188688	0.314631	0.280177	9.47778	DYNC2H1/BBS9	2
GO:0090311	regulation of protein deacetylation	biological process	2/90	42/17913	0.0188688	0.314631	0.280177	9.47778	DYRK1A/MAPK8	2
GO:1901028	regulation of mitochondrial outer membrane permeabilization involved in apoptotic signaling pathway	biological process	2/90	43/17913	0.0197254	0.314631	0.280177	9.25736	PPP3CC/MAPK8	2
GO:0051495	positive regulation of cytoskeleton organization	biological process	4/90	205/17913	0.0198318	0.314631	0.280177	3.88358	CLIP1/FCHSD2/NOX4/SLAIN2	4
GO:0010822	positive regulation of mitochondrion organization	biological process	3/90	115/17913	0.0202179	0.314631	0.280177	5.19217	PPP3CC/MAPK8/FBXO7	3
GO:0051205	protein insertion into membrane	biological process	2/90	44/17913	0.0205981	0.314631	0.280177	9.04697	PPP3CC/MAPK8	2
GO:0060393	regulation of pathway-restricted SMAD protein phosphorylation	biological process	2/90	44/17913	0.0205981	0.314631	0.280177	9.04697	SNX25/ACVR2A	2
GO:0097720	calcineurin-mediated signaling	biological process	2/90	44/17913	0.0205981	0.314631	0.280177	9.04697	NFATC1/PPP3CC	2
GO:0007569	cell aging	biological process	3/90	116/17913	0.0206809	0.314631	0.280177	5.14741	MNT/AKT3/NOX4	3
GO:0031929	TOR signaling	biological process	3/90	116/17913	0.0206809	0.314631	0.280177	5.14741	AKT3/RPS6KB1/FNIP1	3
GO:0032273	positive regulation of protein polymerization	biological process	3/90	116/17913	0.0206809	0.314631	0.280177	5.14741	CLIP1/FCHSD2/SLAIN2	3
GO:0006470	protein dephosphorylation	biological process	5/90	313/17913	0.0207665	0.314631	0.280177	3.17945	LMTK2/DLC1/PPP3CC/PTPN22/PTPN13	5
GO:0010506	regulation of autophagy	biological process	5/90	314/17913	0.0210213	0.314631	0.280177	3.16932	FOXK2/PTK2/PTPN22/MAPK8/FBXO7	5
GO:0001952	regulation of cell-matrix adhesion	biological process	3/90	117/17913	0.0211496	0.314631	0.280177	5.10342	DLC1/PTK2/UTRN	3
GO:0014066	regulation of phosphatidylinositol 3-kinase signaling	biological process	3/90	117/17913	0.0211496	0.314631	0.280177	5.10342	PTK2/PTPN13/NTRK2	3
GO:0046777	protein autophosphorylation	biological process	4/90	210/17913	0.0214484	0.314631	0.280177	3.79111	DYRK1A/LMTK2/PTK2/NTRK2	4
GO:0046580	negative regulation of Ras protein signal transduction	biological process	2/90	45/17913	0.0214866	0.314631	0.280177	8.84593	DLC1/MAPKAP1	2
GO:0051056	regulation of small GTPase mediated signal transduction	biological process	5/90	316/17913	0.0215369	0.314631	0.280177	3.14926	ARHGEF12/FGD6/MYO9B/DLC1/MAPKAP1	5
GO:0002768	immune response-regulating cell surface receptor signaling pathway	biological process	6/90	434/17913	0.0220917	0.314631	0.280177	2.75161	DOCK1/NFATC1/RUNX1/PTK2/PTPN22/MAPK8	6
GO:0033135	regulation of peptidyl-serine phosphorylation	biological process	3/90	119/17913	0.0221046	0.314631	0.280177	5.01765	MAPKAP1/FNIP1/NTRK2	3
GO:1900087	positive regulation of G1/S transition of mitotic cell cycle	biological process	2/90	46/17913	0.0223909	0.314631	0.280177	8.65362	ANKRD17/KMT2E	2
GO:0034329	cell junction assembly	biological process	4/90	214/17913	0.0227985	0.314631	0.280177	3.72025	RUNX1/DLC1/PTK2/PARD3	4
GO:0072655	establishment of protein localization to mitochondrion	biological process	3/90	121/17913	0.0230829	0.314631	0.280177	4.93471	PPP3CC/MAPK8/FBXO7	3
GO:0031589	cell-substrate adhesion	biological process	5/90	322/17913	0.0231331	0.314631	0.280177	3.09058	DOCK1/DLC1/PTK2/ABI3BP/UTRN	5
GO:0044764	multi-organism cellular process	biological process	2/90	47/17913	0.0233107	0.314631	0.280177	8.4695	ANKRD17/FCHSD2	2
GO:0007178	transmembrane receptor protein serine/threonine kinase signaling pathway	biological process	5/90	323/17913	0.0234064	0.314631	0.280177	3.08101	TRIM33/SNX25/PTK2/PARD3/ACVR2A	5
GO:0007006	mitochondrial membrane organization	biological process	3/90	122/17913	0.0235808	0.314631	0.280177	4.89426	PPP3CC/OMA1/MAPK8	3
GO:0007265	Ras protein signal transduction	biological process	5/90	324/17913	0.0236818	0.314631	0.280177	3.0715	ARHGEF12/FGD6/MYO9B/DLC1/MAPKAP1	5
GO:0006979	response to oxidative stress	biological process	6/90	442/17913	0.023902	0.314631	0.280177	2.70181	MAPKAP1/ERCC6L2/MTR/MAPK8/NOX4/FBXO7	6
GO:0030098	lymphocyte differentiation	biological process	5/90	325/17913	0.0239593	0.314631	0.280177	3.06205	RUNX1/SATB1/PTPN22/FBXO7/FNIP1	5
GO:0060389	pathway-restricted SMAD protein phosphorylation	biological process	2/90	48/17913	0.0242459	0.314631	0.280177	8.29306	SNX25/ACVR2A	2
GO:0008360	regulation of cell shape	biological process	3/90	124/17913	0.024594	0.314631	0.280177	4.81532	FGD6/DLC1/PTK2	3
GO:0001819	positive regulation of cytokine production	biological process	6/90	446/17913	0.0248435	0.314631	0.280177	2.67758	DDX21/RUNX1/ZBTB20/ANKRD17/PTPN22/AKAP12	6
GO:0070585	protein localization to mitochondrion	biological process	3/90	125/17913	0.0251094	0.314631	0.280177	4.7768	PPP3CC/MAPK8/FBXO7	3
GO:0001649	osteoblast differentiation	biological process	4/90	222/17913	0.0256515	0.314631	0.280177	3.58619	DDX21/SATB2/PTK2/ACVR2A	4
GO:0050771	negative regulation of axonogenesis	biological process	2/90	50/17913	0.0261617	0.314631	0.280177	7.96133	PTK2/RYK	2
GO:0045620	negative regulation of lymphocyte differentiation	biological process	2/90	51/17913	0.027142	0.314631	0.280177	7.80523	RUNX1/FBXO7	2
GO:0051058	negative regulation of small GTPase mediated signal transduction	biological process	2/90	51/17913	0.027142	0.314631	0.280177	7.80523	DLC1/MAPKAP1	2
GO:1900024	regulation of substrate adhesion-dependent cell spreading	biological process	2/90	51/17913	0.027142	0.314631	0.280177	7.80523	DOCK1/PTK2	2
GO:1902305	regulation of sodium ion transmembrane transport	biological process	2/90	51/17913	0.027142	0.314631	0.280177	7.80523	KLHL24/UTRN	2
GO:0016571	histone methylation	biological process	3/90	130/17913	0.0277733	0.314631	0.280177	4.59308	SATB1/TET2/KMT2E	3
GO:0043547	positive regulation of GTPase activity	biological process	5/90	339/17913	0.0280669	0.314631	0.280177	2.93559	DOCK1/ARHGEF12/MYO9B/ASAP1/DLC1	5
GO:0048016	inositol phosphate-mediated signaling	biological process	2/90	52/17913	0.0281369	0.314631	0.280177	7.65513	NFATC1/PPP3CC	2
GO:0051150	regulation of smooth muscle cell differentiation	biological process	2/90	52/17913	0.0281369	0.314631	0.280177	7.65513	NFATC1/ANKRD17	2
GO:0051568	histone H3-K4 methylation	biological process	2/90	52/17913	0.0281369	0.314631	0.280177	7.65513	TET2/KMT2E	2
GO:0097345	mitochondrial outer membrane permeabilization	biological process	2/90	52/17913	0.0281369	0.314631	0.280177	7.65513	PPP3CC/MAPK8	2
GO:0051250	negative regulation of lymphocyte activation	biological process	3/90	132/17913	0.0288795	0.314631	0.280177	4.52348	RUNX1/PTPN22/FBXO7	3
GO:0050853	B cell receptor signaling pathway	biological process	2/90	53/17913	0.0291463	0.314631	0.280177	7.51069	RUNX1/PTPN22	2
GO:0051258	protein polymerization	biological process	4/90	232/17913	0.0295084	0.314631	0.280177	3.43161	CLIP1/DYRK1A/FCHSD2/SLAIN2	4
GO:0007264	small GTPase mediated signal transduction	biological process	6/90	465/17913	0.0296563	0.314631	0.280177	2.56817	DOCK1/ARHGEF12/FGD6/MYO9B/DLC1/MAPKAP1	6
GO:0007005	mitochondrion organization	biological process	6/90	466/17913	0.0299254	0.314631	0.280177	2.56266	PPP3CC/AKT3/OMA1/MAPK8/FBXO7/FNIP1	6
GO:0006865	amino acid transport	biological process	3/90	134/17913	0.0300089	0.314631	0.280177	4.45597	SLC15A4/RIMS1/NTRK2	3
GO:0070830	bicellular tight junction assembly	biological process	2/90	54/17913	0.0301701	0.314631	0.280177	7.3716	RUNX1/PARD3	2
GO:0010977	negative regulation of neuron projection development	biological process	3/90	135/17913	0.0305823	0.314631	0.280177	4.42296	ASAP1/PTK2/RYK	3
GO:0120192	tight junction assembly	biological process	2/90	55/17913	0.0312081	0.314631	0.280177	7.23758	RUNX1/PARD3	2
GO:0061098	positive regulation of protein tyrosine kinase activity	biological process	2/90	56/17913	0.03226	0.314631	0.280177	7.10833	NOX4/NTRK2	2
GO:1902808	positive regulation of cell cycle G1/S phase transition	biological process	2/90	56/17913	0.03226	0.314631	0.280177	7.10833	ANKRD17/KMT2E	2
GO:0014065	phosphatidylinositol 3-kinase signaling	biological process	3/90	138/17913	0.032337	0.314631	0.280177	4.32681	PTK2/PTPN13/NTRK2	3
GO:0031334	positive regulation of protein complex assembly	biological process	4/90	239/17913	0.0324027	0.314631	0.280177	3.3311	CLIP1/FCHSD2/SLAIN2/FNIP1	4
GO:0038093	Fc receptor signaling pathway	biological process	4/90	241/17913	0.0332592	0.314631	0.280177	3.30346	DOCK1/NFATC1/PTK2/MAPK8	4
GO:0048872	homeostasis of number of cells	biological process	4/90	241/17913	0.0332592	0.314631	0.280177	3.30346	KMT2E/UBAP2L/AKT3/ACVR2A	4
GO:1903749	positive regulation of establishment of protein localization to mitochondrion	biological process	2/90	57/17913	0.0333259	0.314631	0.280177	6.98363	PPP3CC/MAPK8	2
GO:0001501	skeletal system development	biological process	6/90	479/17913	0.0335721	0.314631	0.280177	2.49311	VKORC1/SATB2/BMP1/ACVR2A/RYK/NFIB	6
GO:1902110	positive regulation of mitochondrial membrane permeability involved in apoptotic process	biological process	2/90	58/17913	0.0344054	0.314631	0.280177	6.86322	PPP3CC/MAPK8	2
GO:0001678	cellular glucose homeostasis	biological process	3/90	142/17913	0.0347571	0.314631	0.280177	4.20493	FOXK2/ZBTB20/NOX4	3
GO:0120193	tight junction organization	biological process	2/90	59/17913	0.0354984	0.314631	0.280177	6.74689	RUNX1/PARD3	2
GO:1902686	mitochondrial outer membrane permeabilization involved in programmed cell death	biological process	2/90	60/17913	0.0366048	0.314631	0.280177	6.63444	PPP3CC/MAPK8	2
GO:0002753	cytoplasmic pattern recognition receptor signaling pathway	biological process	2/90	61/17913	0.0377244	0.314631	0.280177	6.52568	ANKRD17/PTPN22	2
GO:0003170	heart valve development	biological process	2/90	61/17913	0.0377244	0.314631	0.280177	6.52568	NFATC1/HECTD1	2
GO:0031646	positive regulation of neurological system process	biological process	2/90	61/17913	0.0377244	0.314631	0.280177	6.52568	PARD3/RIMS1	2
GO:0051893	regulation of focal adhesion assembly	biological process	2/90	61/17913	0.0377244	0.314631	0.280177	6.52568	DLC1/PTK2	2
GO:0090109	regulation of cell-substrate junction assembly	biological process	2/90	61/17913	0.0377244	0.314631	0.280177	6.52568	DLC1/PTK2	2
GO:0050770	regulation of axonogenesis	biological process	3/90	148/17913	0.0385586	0.314631	0.280177	4.03446	PTK2/RYK/NTRK2	3
GO:0015800	acidic amino acid transport	biological process	2/90	62/17913	0.038857	0.314631	0.280177	6.42043	RIMS1/NTRK2	2
GO:0035794	positive regulation of mitochondrial membrane permeability	biological process	2/90	62/17913	0.038857	0.314631	0.280177	6.42043	PPP3CC/MAPK8	2
GO:0048857	neural nucleus development	biological process	2/90	62/17913	0.038857	0.314631	0.280177	6.42043	MAPKAP1/NFIB	2
GO:0043410	positive regulation of MAPK cascade	biological process	6/90	499/17913	0.0397284	0.314631	0.280177	2.39319	KIDINS220/PTPN22/NOX4/RYK/AKAP12/NTRK2	6
GO:0043297	apical junction assembly	biological process	2/90	63/17913	0.0400026	0.314631	0.280177	6.31852	RUNX1/PARD3	2
GO:0050854	regulation of antigen receptor-mediated signaling pathway	biological process	2/90	63/17913	0.0400026	0.314631	0.280177	6.31852	RUNX1/PTPN22	2
GO:0032680	regulation of tumor necrosis factor production	biological process	3/90	151/17913	0.0405359	0.314631	0.280177	3.9543	ZBTB20/PTPN22/AKAP12	3
GO:1902108	regulation of mitochondrial membrane permeability involved in apoptotic process	biological process	2/90	64/17913	0.0411609	0.314631	0.280177	6.21979	PPP3CC/MAPK8	2
GO:1905710	positive regulation of membrane permeability	biological process	2/90	64/17913	0.0411609	0.314631	0.280177	6.21979	PPP3CC/MAPK8	2
GO:0010769	regulation of cell morphogenesis involved in differentiation	biological process	4/90	260/17913	0.0420569	0.314631	0.280177	3.06205	DOCK1/PTK2/RYK/NTRK2	4
GO:0045931	positive regulation of mitotic cell cycle	biological process	3/90	154/17913	0.0425638	0.314631	0.280177	3.87727	ANKRD17/KMT2E/RPS6KB1	3
GO:0032640	tumor necrosis factor production	biological process	3/90	155/17913	0.043251	0.314631	0.280177	3.85226	ZBTB20/PTPN22/AKAP12	3
GO:1903555	regulation of tumor necrosis factor superfamily cytokine production	biological process	3/90	155/17913	0.043251	0.314631	0.280177	3.85226	ZBTB20/PTPN22/AKAP12	3
GO:0051148	negative regulation of muscle cell differentiation	biological process	2/90	66/17913	0.043515	0.314631	0.280177	6.03131	NFATC1/ANKRD17	2
GO:0006338	chromatin remodeling	biological process	3/90	156/17913	0.0439437	0.314631	0.280177	3.82756	SATB2/SATB1/SCMH1	3
GO:1903391	regulation of adherens junction organization	biological process	2/90	67/17913	0.0447106	0.315993	0.28139	5.94129	DLC1/PTK2	2
GO:0001503	ossification	biological process	5/90	388/17913	0.0458476	0.320232	0.285165	2.56486	DDX21/SATB2/PTK2/BMP1/ACVR2A	5
GO:0000082	G1/S transition of mitotic cell cycle	biological process	4/90	269/17913	0.0466428	0.320232	0.285165	2.9596	ANKRD17/KMT2E/RPS6KB1/FBXO7	4
GO:0071706	tumor necrosis factor superfamily cytokine production	biological process	3/90	161/17913	0.0474904	0.320232	0.285165	3.7087	ZBTB20/PTPN22/AKAP12	3
GO:0007162	negative regulation of cell adhesion	biological process	4/90	271/17913	0.0476984	0.320232	0.285165	2.93776	RUNX1/DLC1/PTK2/PTPN22	4
GO:0002695	negative regulation of leukocyte activation	biological process	3/90	163/17913	0.0489476	0.320232	0.285165	3.66319	RUNX1/PTPN22/FBXO7	3
GO:0031032	actomyosin structure organization	biological process	3/90	163/17913	0.0489476	0.320232	0.285165	3.66319	CDC42BPA/DLC1/NOX4	3
GO:1903747	regulation of establishment of protein localization to mitochondrion	biological process	2/90	71/17913	0.0496127	0.322098	0.286827	5.60657	PPP3CC/MAPK8	2

## Sheet: GO CC
databaseID	Description	type	geneRatio	bgRatio	pvalue	padj	qvalue	enrichScore	overlapGeneList	overlapGeneCount
GO:0005938	cell cortex	cellular component	6/95	229/18678	0.00111499	0.0737609	0.063965	5.15137	MYO9B/DLC1/PTK2/EPB41L2/UTRN/AKAP12	6
GO:0030426	growth cone	cellular component	5/95	166/18678	0.00158857	0.0737609	0.063965	5.922	APBB2/LMTK2/PARD3/BOC/UTRN	5
GO:0030427	site of polarized growth	cellular component	5/95	169/18678	0.00171868	0.0737609	0.063965	5.81688	APBB2/LMTK2/PARD3/BOC/UTRN	5
GO:0033267	axon part	cellular component	7/95	354/18678	0.00219595	0.0737609	0.063965	3.88778	ZC3H14/APBB2/LMTK2/PARD3/BOC/UTRN/NTRK2	7
GO:0150034	distal axon	cellular component	6/95	262/18678	0.00220659	0.0737609	0.063965	4.50253	APBB2/LMTK2/PARD3/BOC/UTRN/NTRK2	6
GO:0030027	lamellipodium	cellular component	5/95	191/18678	0.00292432	0.0737609	0.063965	5.14687	CDC42BPA/FGD6/APBB2/PTK2/PTPN13	5
GO:0035371	microtubule plus-end	cellular component	2/95	16/18678	0.00293242	0.0737609	0.063965	24.5763	CLIP1/SLAIN2	2
GO:0030864	cortical actin cytoskeleton	cellular component	3/95	57/18678	0.00305744	0.0737609	0.063965	10.3479	DLC1/EPB41L2/UTRN	3
GO:0031252	cell leading edge	cellular component	7/95	384/18678	0.00344907	0.0739633	0.0641405	3.58405	CDC42BPA/CLIP1/FGD6/APBB2/DLC1/PTK2/PTPN13	7
GO:0099568	cytoplasmic region	cellular component	7/95	402/18678	0.00442714	0.0846746	0.0734293	3.42357	ZC3H14/MYO9B/DLC1/PTK2/EPB41L2/UTRN/AKAP12	7
GO:0042641	actomyosin	cellular component	3/95	67/18678	0.00482602	0.0846746	0.0734293	8.80346	CDC42BPA/PTK2/NOX4	3
GO:0015629	actin cytoskeleton	cellular component	7/95	432/18678	0.00650704	0.104655	0.0907561	3.18582	CDC42BPA/MYO9B/DLC1/PTK2/NOX4/EPB41L2/UTRN	7
GO:1990752	microtubule end	cellular component	2/95	26/18678	0.00768403	0.112595	0.0976421	15.1239	CLIP1/SLAIN2	2
GO:0030863	cortical cytoskeleton	cellular component	3/95	81/18678	0.00816754	0.112595	0.0976421	7.28187	DLC1/EPB41L2/UTRN	3
GO:0044295	axonal growth cone	cellular component	2/95	28/18678	0.00887843	0.114236	0.0990645	14.0436	PARD3/BOC	2
GO:0005912	adherens junction	cellular component	7/95	496/18678	0.013275	0.16013	0.138864	2.77475	LMO7/DLC1/PTK2/NOX4/KLHL24/EPB41L2/AKAP12	7
GO:0005925	focal adhesion	cellular component	6/95	397/18678	0.015825	0.173512	0.150469	2.97144	LMO7/DLC1/PTK2/NOX4/EPB41L2/AKAP12	6
GO:0005924	cell-substrate adherens junction	cellular component	6/95	399/18678	0.0161825	0.173512	0.150469	2.95655	LMO7/DLC1/PTK2/NOX4/EPB41L2/AKAP12	6
GO:0030055	cell-substrate junction	cellular component	6/95	404/18678	0.0171006	0.173706	0.150637	2.91996	LMO7/DLC1/PTK2/NOX4/EPB41L2/AKAP12	6
GO:0031461	cullin-RING ubiquitin ligase complex	cellular component	3/95	124/18678	0.0254061	0.241129	0.209105	4.75671	FBXO7/KLHL24/CRBN	3
GO:0000151	ubiquitin ligase complex	cellular component	4/95	224/18678	0.0274915	0.241129	0.209105	3.5109	LMO7/FBXO7/KLHL24/CRBN	4
GO:0044448	cell cortex part	cellular component	3/95	128/18678	0.0275663	0.241129	0.209105	4.60806	DLC1/EPB41L2/UTRN	3
GO:0001725	stress fiber	cellular component	2/95	56/18678	0.0330021	0.241129	0.209105	7.0218	PTK2/NOX4	2
GO:0097517	contractile actin filament bundle	cellular component	2/95	56/18678	0.0330021	0.241129	0.209105	7.0218	PTK2/NOX4	2
GO:0032432	actin filament bundle	cellular component	2/95	59/18678	0.0363104	0.241129	0.209105	6.66476	PTK2/NOX4	2
GO:0016607	nuclear speck	cellular component	5/95	386/18678	0.0471078	0.267406	0.231893	2.54677	DOCK1/ZC3H14/DYRK1A/KMT2E/AFF2	5

## Sheet: GO MF 
databaseID	Description	type	geneRatio	bgRatio	pvalue	padj	qvalue	enrichScore	overlapGeneList	overlapGeneCount
GO:0005547	phosphatidylinositol-3,4,5-trisphosphate binding	molecular function	4/92	38/16969	5.18634e-05	0.0112025	0.00895326	19.4153	ASAP1/MAPKAP1/PARD3/FCHSD2	4
GO:0060589	nucleoside-triphosphatase regulator activity	molecular function	7/92	267/16969	0.000619353	0.0598128	0.0478036	4.83565	DOCK1/ARHGEF12/MYO9B/ASAP1/DLC1/FNIP1/RIMS1	7
GO:0004674	protein serine/threonine kinase activity	molecular function	8/92	371/16969	0.000911769	0.0598128	0.0478036	3.97726	CDC42BPA/DYRK1A/CDK14/LMTK2/PRKY/AKT3/MAPK8/ACVR2A	8
GO:0030695	GTPase regulator activity	molecular function	6/92	235/16969	0.00175081	0.0598128	0.0478036	4.70925	DOCK1/ARHGEF12/MYO9B/ASAP1/DLC1/RIMS1	6
GO:0017016	Ras GTPase binding	molecular function	7/92	320/16969	0.00176937	0.0598128	0.0478036	4.03475	DOCK1/ARHGEF12/FGD6/MYO9B/MAPKAP1/RUSC2/RIMS1	7
GO:1902936	phosphatidylinositol bisphosphate binding	molecular function	4/92	96/16969	0.00183749	0.0598128	0.0478036	7.68524	ASAP1/MAPKAP1/PARD3/FCHSD2	4
GO:0051020	GTPase binding	molecular function	8/92	426/16969	0.00218585	0.0598128	0.0478036	3.46377	DOCK1/ARHGEF12/FGD6/MYO9B/MAPKAP1/RUSC2/FNIP1/RIMS1	8
GO:0031267	small GTPase binding	molecular function	7/92	333/16969	0.00221529	0.0598128	0.0478036	3.87724	DOCK1/ARHGEF12/FGD6/MYO9B/MAPKAP1/RUSC2/RIMS1	7
GO:0005096	GTPase activator activity	molecular function	5/92	203/16969	0.00494684	0.114154	0.091234	4.543	DOCK1/ARHGEF12/MYO9B/ASAP1/DLC1	5
GO:0005546	phosphatidylinositol-4,5-bisphosphate binding	molecular function	3/92	65/16969	0.0052849	0.114154	0.091234	8.51288	ASAP1/MAPKAP1/PARD3	3
GO:0035091	phosphatidylinositol binding	molecular function	5/92	217/16969	0.00653083	0.11759	0.09398	4.2499	SNX25/ASAP1/MAPKAP1/PARD3/FCHSD2	5
GO:0005089	Rho guanyl-nucleotide exchange factor activity	molecular function	3/92	73/16969	0.00729496	0.11759	0.09398	7.57996	DOCK1/ARHGEF12/FGD6	3
GO:0001227	DNA-binding transcription repressor activity, RNA polymerase II-specific	molecular function	5/92	224/16969	0.00744335	0.11759	0.09398	4.11709	ETV6/MNT/FOXK2/ZBTB20/SATB1	5
GO:1901981	phosphatidylinositol phosphate binding	molecular function	4/92	143/16969	0.00762155	0.11759	0.09398	5.15932	ASAP1/MAPKAP1/PARD3/FCHSD2	4
GO:0017048	Rho GTPase binding	molecular function	4/92	146/16969	0.00818801	0.117907	0.094234	5.05331	DOCK1/ARHGEF12/FGD6/MYO9B	4
GO:0043325	phosphatidylinositol-3,4-bisphosphate binding	molecular function	2/92	27/16969	0.00934486	0.126156	0.100826	13.6626	MAPKAP1/FCHSD2	2
GO:0042169	SH2 domain binding	molecular function	2/92	35/16969	0.0154034	0.194354	0.155332	10.5398	DLC1/PTK2	2
GO:0004715	non-membrane spanning protein tyrosine kinase activity	molecular function	2/92	37/16969	0.0171214	0.194354	0.155332	9.97004	DYRK1A/PTK2	2
GO:0001228	DNA-binding transcription activator activity, RNA polymerase II-specific	molecular function	6/92	390/16969	0.0193291	0.194354	0.155332	2.83763	ETV6/FOXK2/NFATC1/SATB2/RUNX1/NFIB	6
GO:0004712	protein serine/threonine/tyrosine kinase activity	molecular function	2/92	40/16969	0.0198432	0.194354	0.155332	9.22228	DYRK1A/RPS6KB1	2
GO:0015026	coreceptor activity	molecular function	2/92	40/16969	0.0198432	0.194354	0.155332	9.22228	ACVR2A/RYK	2
GO:0005085	guanyl-nucleotide exchange factor activity	molecular function	4/92	196/16969	0.0219403	0.194354	0.155332	3.7642	DOCK1/ARHGEF12/FGD6/FNIP1	4
GO:0004713	protein tyrosine kinase activity	molecular function	3/92	120/16969	0.0274775	0.194354	0.155332	4.61114	DYRK1A/PTK2/NTRK2	3
GO:0005088	Ras guanyl-nucleotide exchange factor activity	molecular function	3/92	125/16969	0.0304988	0.194354	0.155332	4.4267	DOCK1/ARHGEF12/FGD6	3
GO:0004386	helicase activity	molecular function	3/92	128/16969	0.0323923	0.194354	0.155332	4.32294	DDX21/ERCC6L2/CHD9	3
GO:0140030	modification-dependent protein binding	molecular function	3/92	135/16969	0.0370446	0.196751	0.157248	4.09879	ZRANB1/KMT2E/TDRD3	3
GO:0043621	protein self-association	molecular function	2/92	56/16969	0.0370578	0.196751	0.157248	6.58734	DYRK1A/ACVR2A	2
GO:0005543	phospholipid binding	molecular function	5/92	363/16969	0.0474236	0.20712	0.165535	2.54057	SNX25/ASAP1/MAPKAP1/PARD3/FCHSD2	5
GO:0019199	transmembrane receptor protein kinase activity	molecular function	2/92	65/16969	0.0485184	0.20712	0.165535	5.67525	ACVR2A/NTRK2	2
GO:0072341	modified amino acid binding	molecular function	2/92	65/16969	0.0485184	0.20712	0.165535	5.67525	ASAP1/NOX4	2
GO:0035064	methylated histone binding	molecular function	2/92	66/16969	0.0498623	0.20712	0.165535	5.58926	KMT2E/TDRD3	2
GO:0140034	methylation-dependent protein binding	molecular function	2/92	66/16969	0.0498623	0.20712	0.165535	5.58926	KMT2E/TDRD3	2

## Sheet: KEGG pathway
databaseID	Description	geneRatio	bgRatio	pvalue	padj	qvalue	enrichScore	overlapGeneList	overlapGeneCount
hsa05135	Yersinia infection	6/37	120/7946	1.65937e-05	0.00253884	0.00181658	10.7378	DOCK1/ARHGEF12/NFATC1/PTK2/AKT3/MAPK8	6
hsa04625	C-type lectin receptor signaling pathway	5/37	104/7946	0.000108967	0.00833598	0.00596451	10.3248	ARHGEF12/NFATC1/PPP3CC/AKT3/MAPK8	5
hsa04360	Axon guidance	6/37	181/7946	0.000166128	0.00847253	0.00606222	7.11901	ARHGEF12/PTK2/PPP3CC/PARD3/BOC/RYK	6
hsa05170	Human immunodeficiency virus 1 infection	6/37	212/7946	0.000391137	0.0140072	0.0100223	6.07802	NFATC1/PTK2/PPP3CC/AKT3/MAPK8/RPS6KB1	6
hsa05163	Human cytomegalovirus infection	6/37	225/7946	0.000537224	0.0140072	0.0100223	5.72685	ARHGEF12/NFATC1/PTK2/PPP3CC/AKT3/RPS6KB1	6
hsa04012	ErbB signaling pathway	4/37	85/7946	0.00061548	0.0140072	0.0100223	10.1062	PTK2/AKT3/MAPK8/RPS6KB1	4
hsa04150	mTOR signaling pathway	5/37	153/7946	0.000657148	0.0140072	0.0100223	7.01819	CLIP1/MAPKAP1/AKT3/RPS6KB1/FNIP1	5
hsa05235	PD-L1 expression and PD-1 checkpoint pathway in cancer	4/37	89/7946	0.000732401	0.0140072	0.0100223	9.65199	NFATC1/PPP3CC/AKT3/RPS6KB1	4
hsa01522	Endocrine resistance	4/37	98/7946	0.00105168	0.0173514	0.0124152	8.76558	PTK2/AKT3/MAPK8/RPS6KB1	4
hsa04933	AGE-RAGE signaling pathway in diabetic complications	4/37	100/7946	0.00113408	0.0173514	0.0124152	8.59027	NFATC1/AKT3/MAPK8/NOX4	4
hsa04660	T cell receptor signaling pathway	4/37	104/7946	0.00131233	0.0182533	0.0130605	8.25988	NFATC1/PPP3CC/AKT3/MAPK8	4
hsa04659	Th17 cell differentiation	4/37	107/7946	0.00145829	0.0185932	0.0133037	8.02829	NFATC1/RUNX1/PPP3CC/MAPK8	4
hsa04722	Neurotrophin signaling pathway	4/37	119/7946	0.00215641	0.0253793	0.0181592	7.21871	KIDINS220/AKT3/MAPK8/NTRK2	4
hsa04370	VEGF signaling pathway	3/37	59/7946	0.00252549	0.0276	0.0197482	10.9198	PTK2/PPP3CC/AKT3	3
hsa04380	Osteoclast differentiation	4/37	128/7946	0.00281194	0.0286818	0.0205222	6.71115	NFATC1/PPP3CC/AKT3/MAPK8	4
hsa05221	Acute myeloid leukemia	3/37	67/7946	0.0036277	0.0340637	0.0243731	9.61597	RUNX1/AKT3/RPS6KB1	3
hsa05418	Fluid shear stress and atherosclerosis	4/37	139/7946	0.00378486	0.0340637	0.0243731	6.18005	PTK2/AKT3/MAPK8/ACVR2A	4
hsa05131	Shigellosis	5/37	236/7946	0.00444246	0.0377609	0.0270185	4.54993	DOCK1/PTK2/AKT3/MAPK8/RPS6KB1	5
hsa05212	Pancreatic cancer	3/37	76/7946	0.005173	0.0416563	0.0298057	8.47724	AKT3/MAPK8/RPS6KB1	3
hsa04310	Wnt signaling pathway	4/37	160/7946	0.00623454	0.0465797	0.0333284	5.36892	NFATC1/PPP3CC/MAPK8/RYK	4
hsa04662	B cell receptor signaling pathway	3/37	82/7946	0.00639329	0.0465797	0.0333284	7.85695	NFATC1/PPP3CC/AKT3	3
hsa05210	Colorectal cancer	3/37	86/7946	0.0072946	0.0507307	0.0362985	7.49151	AKT3/MAPK8/RPS6KB1	3
hsa04658	Th1 and Th2 cell differentiation	3/37	92/7946	0.00878187	0.0574014	0.0410715	7.00294	NFATC1/PPP3CC/MAPK8	3
hsa04666	Fc gamma R-mediated phagocytosis	3/37	93/7946	0.00904579	0.0574014	0.0410715	6.92764	ASAP1/AKT3/RPS6KB1	3
hsa05152	Tuberculosis	4/37	180/7946	0.00938762	0.0574014	0.0410715	4.77237	ARHGEF12/PPP3CC/AKT3/MAPK8	4
hsa05231	Choline metabolism in cancer	3/37	98/7946	0.0104352	0.0574014	0.0410715	6.57419	AKT3/MAPK8/RPS6KB1	3
hsa05167	Kaposi sarcoma-associated herpesvirus infection	4/37	186/7946	0.0105048	0.0574014	0.0410715	4.61842	NFATC1/PPP3CC/AKT3/MAPK8	4
hsa05202	Transcriptional misregulation in cancer	4/37	186/7946	0.0105048	0.0574014	0.0410715	4.61842	ETV6/RUNX1/CDK14/PTK2	4
hsa04010	MAPK signaling pathway	5/37	295/7946	0.0112139	0.0591632	0.0423321	3.63995	NFATC1/PPP3CC/AKT3/MAPK8/NTRK2	5
hsa04510	Focal adhesion	4/37	199/7946	0.0132145	0.066971	0.0479187	4.31672	DOCK1/PTK2/AKT3/MAPK8	4
hsa04931	Insulin resistance	3/37	108/7946	0.0135693	0.066971	0.0479187	5.96547	AKT3/MAPK8/RPS6KB1	3
hsa05205	Proteoglycans in cancer	4/37	204/7946	0.0143657	0.068686	0.0491458	4.21092	ARHGEF12/PTK2/AKT3/RPS6KB1	4
hsa04935	Growth hormone synthesis, secretion and action	3/37	119/7946	0.0175757	0.0814874	0.0583054	5.41404	PTK2/AKT3/MAPK8	3
hsa05166	Human T-cell leukemia virus 1 infection	4/37	219/7946	0.0181972	0.0818875	0.0585917	3.9225	NFATC1/PPP3CC/AKT3/MAPK8	4
hsa04728	Dopaminergic synapse	3/37	131/7946	0.022626	0.0989079	0.07077	4.91809	PPP3CC/AKT3/MAPK8	3
hsa04210	Apoptosis	3/37	136/7946	0.0249411	0.102345	0.0732295	4.73728	AKT3/MAPK8/PTPN13	3
hsa04140	Autophagy - animal	3/37	137/7946	0.0254191	0.102345	0.0732295	4.7027	AKT3/MAPK8/RPS6KB1	3
hsa04910	Insulin signaling pathway	3/37	137/7946	0.0254191	0.102345	0.0732295	4.7027	AKT3/MAPK8/RPS6KB1	3
hsa04213	Longevity regulating pathway - multiple species	2/37	62/7946	0.0334919	0.131391	0.0940123	6.92764	AKT3/RPS6KB1	2
hsa04218	Cellular senescence	3/37	160/7946	0.0377779	0.141017	0.1009	4.02669	NFATC1/PPP3CC/AKT3	3
hsa05161	Hepatitis B	3/37	162/7946	0.0389754	0.141017	0.1009	3.97698	NFATC1/AKT3/MAPK8	3
hsa04664	Fc epsilon RI signaling pathway	2/37	68/7946	0.0396528	0.141017	0.1009	6.31638	AKT3/MAPK8	2
hsa04920	Adipocytokine signaling pathway	2/37	69/7946	0.0407188	0.141017	0.1009	6.22483	AKT3/MAPK8	2
hsa04917	Prolactin signaling pathway	2/37	70/7946	0.0417956	0.141017	0.1009	6.13591	AKT3/MAPK8	2
hsa04022	cGMP-PKG signaling pathway	3/37	167/7946	0.0420539	0.141017	0.1009	3.85791	NFATC1/PPP3CC/AKT3	3
hsa04520	Adherens junction	2/37	71/7946	0.0428832	0.141017	0.1009	6.04949	LMO7/PARD3	2
hsa04530	Tight junction	3/37	169/7946	0.0433191	0.141017	0.1009	3.81225	RUNX1/PARD3/MAPK8	3
hsa05100	Bacterial invasion of epithelial cells	2/37	73/7946	0.0450902	0.143725	0.102837	5.88375	DOCK1/PTK2	2
hsa05220	Chronic myeloid leukemia	2/37	76/7946	0.0484784	0.151371	0.108308	5.65149	RUNX1/AKT3	2

## Sheet: CircRNA-miRNA
miRNA	circRNA	totalScore	totalEnergy	maxScore	maxEnergy	miRLen	circLen	positions	mreFreq
hsa-let-7a-3p	chr2_148653869_148657467_+	150	-21.59	150	-21.59	21	473	200	1
hsa-let-7b-5p	chr11_92085261_92088570_+	156	-25.12	156	-25.12	22	3309	2391	1
hsa-let-7d-5p	chr8_22332466_22333137_+	153	-21.04	153	-21.04	22	323	260	1
hsa-let-7d-5p	chr7_97820039_97823884_+	161	-22.46	161	-22.46	22	3109	1435	1
hsa-let-7e-5p	chr7_97820039_97823884_+	165	-26.83	165	-26.83	22	3109	1438	1
hsa-let-7e-5p	chr17_58012553_58018304_+	156	-22.2	156	-22.2	22	357	58	1
hsa-let-7e-3p	chr12_95602618_95605043_-	150	-20.16	150	-20.16	22	2425	2355	1
hsa-miR-15a-3p	chr8_13356557_13357705_-	163	-21.99	163	-21.99	22	1148	986	1
hsa-miR-15a-3p	chr2_148653869_148657467_+	184	-26.48	184	-26.48	22	473	427	1
hsa-miR-15a-3p	chr4_62800557_62910267_+	155	-22.74	155	-22.74	22	1702	1384	1
hsa-miR-16-5p	chr17_2297336_2298748_-	152	-22.05	152	-22.05	22	734	692	1
hsa-miR-16-1-3p	chr11_92085261_92088570_+	159	-21.02	159	-21.02	22	3309	1308	1
hsa-miR-17-3p	chr4_41015599_41016415_-	154	-21.84	154	-21.84	22	816	341	1
hsa-miR-18a-3p	chr1_243776972_244006584_-	151	-23.21	151	-23.21	23	808	11	1
hsa-miR-18a-3p	chr1_243708811_244006584_-	151	-23.21	151	-23.21	23	1363	11	1
hsa-miR-21-3p	chr11_92085261_92088570_+	155	-21.31	155	-21.31	21	3309	1894	1
hsa-miR-21-3p	chr7_65705311_65706257_+	152	-20.21	152	-20.21	21	946	466	1
hsa-miR-21-3p	chr7_65705311_65751696_+	152	-20.21	152	-20.21	21	1145	466	1
hsa-miR-21-3p	chr5_176963358_176966148_-	162	-24.33	162	-24.33	21	866	82	1
hsa-miR-21-3p	chr7_97820039_97823884_+	326	-49.17	166	-25.51	21	3109	2542 2370	2
hsa-miR-21-3p	chr22_32874967_32875262_+	164	-27.96	164	-27.96	21	295	260	1
hsa-miR-21-3p	chr2_148653869_148657467_+	162	-22.79	162	-22.79	21	473	66	1
hsa-miR-22-5p	chr10_70719561_70720005_+	158	-24.78	158	-24.78	22	444	405	1
hsa-miR-22-5p	chr6_131276244_131277639_-	170	-21.46	170	-21.46	22	719	323	1
hsa-miR-22-5p	chr6_131247744_131277639_-	170	-21.46	170	-21.46	22	824	323	1
hsa-miR-22-5p	chr14_31596990_31602881_-	151	-23.39	151	-23.39	22	1403	314	1
hsa-miR-22-3p	chr8_22054192_22054933_+	168	-20.8	168	-20.8	22	342	77	1
hsa-miR-23a-5p	chr8_13356557_13357705_-	163	-31.92	163	-31.92	22	1148	1093	1
hsa-miR-23a-5p	chr9_4286037_4286523_-	154	-28.87	154	-28.87	22	486	127	1
hsa-miR-23a-5p	chr17_2297336_2298748_-	155	-29.7	155	-29.7	22	734	77	1
hsa-miR-23a-5p	chr1_227192694_227204751_-	151	-20.66	151	-20.66	22	546	413	1
hsa-miR-23a-5p	chr9_35546426_35548532_+	166	-29.48	166	-29.48	22	2106	790	1
hsa-miR-23a-5p	chr12_95602618_95605043_-	162	-27.1	162	-27.1	22	2425	1703	1
hsa-miR-23a-5p	chr4_73956383_73958017_-	152	-25.27	152	-25.27	22	1634	1010	1
hsa-miR-23a-5p	chr5_176963358_176966148_-	151	-25.76	151	-25.76	22	866	339	1
hsa-miR-23a-5p	chr16_53175090_53191453_+	155	-27.89	155	-27.89	22	1616	1250	1
hsa-miR-23a-5p	chr3_112968568_112969680_+	153	-33.46	153	-33.46	22	457	329	1
hsa-miR-23a-3p	chr16_31733946_31734674_+	169	-22.38	169	-22.38	21	223	175	1
hsa-miR-24-3p	chr4_106155053_106158508_+	155	-21.95	155	-21.95	22	3455	2160	1
hsa-miR-26a-5p	chr16_53175090_53191453_+	156	-26.56	156	-26.56	22	1616	50	1
hsa-miR-26b-3p	chr6_131276244_131277639_-	154	-21.85	154	-21.85	22	719	320	1
hsa-miR-26b-3p	chr6_131247744_131277639_-	154	-21.85	154	-21.85	22	824	320	1
hsa-miR-27a-5p	chr16_31102095_31102663_-	150	-26.91	150	-26.91	22	501	194	1
hsa-miR-27a-5p	chr14_31596990_31602881_-	152	-24.93	152	-24.93	22	1403	799	1
hsa-miR-27a-5p	chr10_49609654_49618211_+	152	-22.39	152	-22.39	22	499	205	1
hsa-miR-27a-3p	chr7_65705311_65706257_+	153	-20.43	153	-20.43	21	946	235	1
hsa-miR-27a-3p	chr7_65705311_65751696_+	153	-20.43	153	-20.43	21	1145	235	1
hsa-miR-27a-3p	chr8_17601112_17613470_-	156	-21.41	156	-21.41	21	2441	589	1
hsa-miR-27a-3p	chr3_112968568_112969680_+	160	-23.62	160	-23.62	21	457	429	1
hsa-miR-28-5p	chr3_114069120_114070725_-	151	-20.84	151	-20.84	22	1605	925	1
hsa-miR-28-5p	chr4_62800557_62910267_+	156	-22.94	156	-22.94	22	1702	591	1
hsa-miR-29a-5p	chr4_48371865_48396670_+	153	-24.49	153	-24.49	22	971	25	1
hsa-miR-30a-3p	chr2_24357988_24369956_+	152	-21.31	152	-21.31	22	587	523	1
hsa-miR-30a-3p	chr1_243776972_244006584_-	166	-21.31	166	-21.31	22	808	680	1
hsa-miR-30a-3p	chr1_243708811_244006584_-	166	-21.31	166	-21.31	22	1363	680	1
hsa-miR-31-5p	chr5_131013395_131044965_-	159	-21.68	159	-21.68	21	813	670	1
hsa-miR-31-3p	chr5_131013395_131044965_-	151	-21.39	151	-21.39	22	813	43	1
hsa-miR-33a-5p	chr8_141810557_141900868_-	152	-21.26	152	-21.26	21	1125	575	1
hsa-miR-33a-3p	chr10_32854485_32873232_+	150	-21.58	150	-21.58	22	536	372	1
hsa-miR-92a-1-5p	chr7_97820039_97823884_+	152	-21.98	152	-21.98	23	3109	2190	1
hsa-miR-92a-1-5p	chr3_114069120_114070725_-	150	-22.08	150	-22.08	23	1605	1413	1
hsa-miR-92a-3p	chr14_31596990_31602881_-	154	-23.03	154	-23.03	22	1403	836	1
hsa-miR-92a-3p	chr4_62800557_62910267_+	158	-22.68	158	-22.68	22	1702	1308	1
hsa-miR-92a-2-5p	chr9_4286037_4286523_-	158	-26.63	158	-26.63	22	486	110	1
hsa-miR-92a-2-5p	chr4_41015599_41016415_-	158	-22.98	158	-22.98	22	816	386	1
hsa-miR-92a-2-5p	chr9_35546426_35548532_+	154	-21.21	154	-21.21	22	2106	1363	1
hsa-miR-92a-2-5p	chr7_104702610_104707254_+	175	-26.75	175	-26.75	22	426	37	1
hsa-miR-92a-2-5p	chr7_97820039_97823884_+	160	-25.4	160	-25.4	22	3109	374	1
hsa-miR-92a-2-5p	chr10_32832227_32873232_+	160	-22.47	160	-22.47	22	597	525	1
hsa-miR-92a-2-5p	chr10_32854485_32873232_+	160	-22.47	160	-22.47	22	536	155	1
hsa-miR-92a-2-5p	chr7_104702610_104722244_+	175	-26.75	175	-26.75	22	1287	37	1
hsa-miR-92a-2-5p	chr9_14120438_14179779_-	151	-21.2	151	-21.2	22	683	594	1
hsa-miR-93-3p	chr5_131013395_131044965_-	150	-21.28	150	-21.28	22	813	64	1
hsa-miR-96-5p	chr6_73005639_73043538_+	156	-20.79	156	-20.79	23	546	466	1
hsa-miR-99a-5p	chr3_114069120_114070725_-	152	-23.73	152	-23.73	22	1605	273	1
hsa-miR-100-3p	chr7_65705311_65751696_+	157	-20.08	157	-20.08	22	1145	1052	1
hsa-miR-101-3p	chr4_87685745_87689129_+	168	-23.83	168	-23.83	21	487	121	1
hsa-miR-29b-1-5p	chr7_90355880_90419967_+	164	-22.49	164	-22.49	24	421	115	1
hsa-miR-29b-1-5p	chr3_171969049_171979873_+	150	-22.47	150	-22.47	24	282	28	1
hsa-miR-29b-1-5p	chr9_98740342_98766983_+	167	-21.04	167	-21.04	24	337	275	1
hsa-miR-29b-1-5p	chr4_106155053_106158508_+	177	-22.7	177	-22.7	24	3455	1711	1
hsa-miR-29b-1-5p	chr7_97820039_97823884_+	157	-26.2	157	-26.2	24	3109	384	1
hsa-miR-29b-1-5p	chr8_17570722_17581342_-	156	-21.46	156	-21.46	24	336	192	1
hsa-miR-29b-2-5p	chr7_90355880_90419967_+	158	-21.05	158	-21.05	22	421	116	1
hsa-miR-29b-2-5p	chr4_106155053_106158508_+	169	-23.19	169	-23.19	22	3455	1713	1
hsa-miR-29b-2-5p	chr7_97820039_97823884_+	156	-25.6	156	-25.6	22	3109	385	1
hsa-miR-103a-2-5p	chr8_141810557_141900868_-	155	-24.4	155	-24.4	23	1125	582	1
hsa-miR-103a-2-5p	chr11_120343758_120348235_+	155	-22.25	155	-22.25	23	577	432	1
hsa-miR-103a-2-5p	chr9_111812562_111812972_-	162	-23.46	162	-23.46	23	269	242	1
hsa-miR-103a-3p	chr16_31102095_31102663_-	161	-25.4	161	-25.4	23	501	16	1
hsa-miR-103a-3p	chr1_41536266_41541123_-	158	-21.65	158	-21.65	23	360	299	1
hsa-miR-103a-3p	chr8_17601112_17613470_-	152	-21.85	152	-21.85	23	2441	1712	1
hsa-miR-103a-3p	chr11_89155069_89185063_-	162	-20.28	162	-20.28	23	476	437	1
hsa-miR-103a-3p	chr17_58012553_58018304_+	151	-20.4	151	-20.4	23	357	103	1
hsa-miR-106a-3p	chr11_92085261_92088570_+	160	-20.31	160	-20.31	22	3309	299	1
hsa-miR-106a-3p	chr4_106155053_106158508_+	150	-21.22	150	-21.22	22	3455	748	1
hsa-miR-107	chr16_31102095_31102663_-	161	-25.4	161	-25.4	23	501	16	1
hsa-miR-107	chr7_97820039_97823884_+	160	-21.82	160	-21.82	23	3109	308	1
hsa-miR-107	chr1_41536266_41541123_-	158	-21.65	158	-21.65	23	360	299	1
hsa-miR-107	chr8_17601112_17613470_-	152	-21.85	152	-21.85	23	2441	1712	1
hsa-miR-107	chr17_58012553_58018304_+	151	-20.4	151	-20.4	23	357	103	1
hsa-miR-197-5p	chr17_2297336_2298748_-	163	-27.08	163	-27.08	23	734	208	1
hsa-miR-197-5p	chr19_17212469_17213367_+	158	-26.35	158	-26.35	23	898	105	1
hsa-miR-197-5p	chr16_31102095_31102663_-	156	-36.18	156	-36.18	23	501	54	1
hsa-miR-197-5p	chr5_176963358_176966148_-	156	-21.21	156	-21.21	23	866	707	1
hsa-miR-197-5p	chr1_41536266_41541123_-	159	-31.8	159	-31.8	23	360	151	1
hsa-miR-197-3p	chr9_35546426_35548532_+	151	-31.26	151	-31.26	22	2106	185	1
hsa-miR-198	chr6_118832460_118887479_-	155	-23.24	155	-23.24	22	1025	428	1
hsa-miR-198	chr4_106155053_106158508_+	152	-30.07	152	-30.07	22	3455	344	1
hsa-miR-198	chr1_58971731_59004982_-	152	-30.65	152	-30.65	22	1381	974	1
hsa-miR-198	chr11_89133184_89135710_-	151	-24.15	151	-24.15	22	445	216	1
hsa-miR-199a-3p	chr8_17601112_17613470_-	161	-26.95	161	-26.95	22	2441	589	1
hsa-miR-199a-3p	chr1_243776972_244006584_-	154	-22.58	154	-22.58	22	808	330	1
hsa-miR-199a-3p	chr1_243708811_244006584_-	154	-22.58	154	-22.58	22	1363	330	1
hsa-miR-208a-5p	chr11_92085261_92088570_+	160	-21.82	160	-21.82	22	3309	2068	1
hsa-miR-208a-5p	chr4_106155053_106158508_+	150	-20.63	150	-20.63	22	3455	2039	1
hsa-miR-129-5p	chr8_13356557_13357705_-	151	-21.62	151	-21.62	21	1148	273	1
hsa-miR-129-5p	chr12_95602618_95605043_-	152	-23.31	152	-23.31	21	2425	1780	1
hsa-miR-148a-5p	chr7_97820039_97823884_+	157	-23.19	157	-23.19	22	3109	2603	1
hsa-miR-148a-5p	chr16_53175090_53191453_+	159	-20.81	159	-20.81	22	1616	139	1
hsa-miR-30c-5p	chr3_169694733_169706147_+	152	-20.18	152	-20.18	23	585	510	1
hsa-miR-30c-2-3p	chr2_200233327_200298237_-	156	-21.63	156	-21.63	22	531	406	1
hsa-miR-30c-2-3p	chr3_18419661_18462483_-	153	-21.95	153	-21.95	22	1599	1173	1
hsa-miR-30c-2-3p	chr9_35546426_35548532_+	150	-22.48	150	-22.48	22	2106	2032	1
hsa-miR-30d-3p	chr1_243776972_244006584_-	171	-22.28	171	-22.28	22	808	680	1
hsa-miR-30d-3p	chr1_243708811_244006584_-	171	-22.28	171	-22.28	22	1363	680	1
hsa-miR-139-3p	chr8_141810557_141900868_-	151	-21.56	151	-21.56	23	1125	328	1
hsa-miR-147a	chr9_98740342_98766983_+	166	-25.76	166	-25.76	20	337	177	1
hsa-miR-7-5p	chr6_131276244_131277639_-	165	-26.6	165	-26.6	23	719	113	1
hsa-miR-7-5p	chr6_131247744_131277639_-	165	-26.6	165	-26.6	23	824	113	1
hsa-miR-7-5p	chr19_22157530_22171711_-	170	-22.72	170	-22.72	23	302	104	1
hsa-miR-7-5p	chr4_48371865_48396670_+	167	-21.49	167	-21.49	23	971	835	1
hsa-miR-7-2-3p	chr1_58971731_59004982_-	150	-20.33	150	-20.33	22	1381	1033	1
hsa-miR-10a-5p	chr4_106155053_106158508_+	156	-22.88	156	-22.88	23	3455	2718	1
hsa-miR-10b-5p	chr4_106155053_106158508_+	164	-27.26	164	-27.26	23	3455	2718	1
hsa-miR-34a-5p	chr8_13356557_13357705_-	162	-22.18	162	-22.18	22	1148	560	1
hsa-miR-34a-5p	chr9_35546426_35548532_+	156	-25.15	156	-25.15	22	2106	139	1
hsa-miR-34a-5p	chr1_236969443_236979843_+	152	-23.09	152	-23.09	22	572	388	1
hsa-miR-34a-5p	chr17_67124759_67130883_-	151	-26.59	151	-26.59	22	659	74	1
hsa-miR-181a-5p	chr5_65349233_65350779_+	154	-20.7	154	-20.7	23	1546	99	1
hsa-miR-181a-5p	chr19_4511522_4511918_-	155	-21.9	155	-21.9	23	396	56	1
hsa-miR-181a-2-3p	chr9_4286037_4286523_-	157	-27.79	157	-27.79	22	486	152	1
hsa-miR-181b-5p	chr19_17212469_17213367_+	155	-27.32	155	-27.32	23	898	46	1
hsa-miR-181b-5p	chr4_186168447_186188309_+	151	-20.09	151	-20.09	23	662	544	1
hsa-miR-181b-5p	chr12_95602618_95605043_-	152	-28.11	152	-28.11	23	2425	587	1
hsa-miR-181b-5p	chr19_4511522_4511918_-	163	-26.58	163	-26.58	23	396	56	1
hsa-miR-181c-5p	chr19_17212469_17213367_+	158	-27.24	158	-27.24	22	898	46	1
hsa-miR-181c-5p	chr7_97820039_97823884_+	156	-22.28	156	-22.28	22	3109	1723	1
hsa-miR-181c-3p	chr7_97820039_97823884_+	153	-25.91	153	-25.91	22	3109	2221	1
hsa-miR-182-5p	chr5_176963358_176966148_-	155	-28.27	155	-28.27	24	866	168	1
hsa-miR-182-5p	chr3_114069120_114070725_-	158	-20.97	158	-20.97	24	1605	1193	1
hsa-miR-182-5p	chr16_53288349_53308214_+	163	-20.07	163	-20.07	24	1106	326	1
hsa-miR-187-5p	chr3_169694733_169706147_+	157	-22.4	157	-22.4	22	585	542	1
hsa-miR-187-3p	chr4_186168447_186188309_+	154	-22.79	154	-22.79	22	662	286	1
hsa-miR-187-3p	chr5_65349233_65350779_+	151	-20.43	151	-20.43	22	1546	863	1
hsa-miR-199b-3p	chr8_17601112_17613470_-	161	-26.95	161	-26.95	22	2441	589	1
hsa-miR-199b-3p	chr1_243776972_244006584_-	154	-22.58	154	-22.58	22	808	330	1
hsa-miR-199b-3p	chr1_243708811_244006584_-	154	-22.58	154	-22.58	22	1363	330	1
hsa-miR-203a-5p	chr7_97820039_97823884_+	154	-21.06	154	-21.06	25	3109	2512	1
hsa-miR-203a-5p	chr7_24663284_24690331_+	155	-22.93	155	-22.93	25	653	402	1
hsa-miR-203a-3p	chr3_18419661_18462483_-	174	-20.58	174	-20.58	22	1599	735	1
hsa-miR-204-3p	chr11_92085261_92088570_+	150	-22.99	150	-22.99	21	3309	3134	1
hsa-miR-204-3p	chr12_129299319_129299615_-	150	-22.84	150	-22.84	21	296	247	1
hsa-miR-204-3p	chr4_106155053_106158508_+	150	-20.8	150	-20.8	21	3455	1410	1
hsa-miR-204-3p	chr7_97820039_97823884_+	150	-25.24	150	-25.24	21	3109	1948	1
hsa-miR-204-3p	chr7_33388679_33427756_+	157	-21.65	157	-21.65	21	786	342	1
hsa-miR-205-5p	chr2_190593385_190609514_+	155	-20.36	155	-20.36	22	1026	325	1
hsa-miR-205-3p	chr7_97820039_97823884_+	151	-20.31	151	-20.31	21	3109	1310	1
hsa-miR-205-3p	chr10_49609654_49618211_+	162	-22.99	162	-22.99	21	499	470	1
hsa-miR-210-5p	chr9_37424841_37426651_+	151	-30.8	151	-30.8	22	321	51	1
hsa-miR-210-5p	chr1_236969443_236979843_+	151	-25.84	151	-25.84	22	572	164	1
hsa-miR-210-5p	chr1_58971731_59004982_-	157	-21.28	157	-21.28	22	1381	500	1
hsa-miR-210-5p	chr19_4511522_4511918_-	155	-26.4	155	-26.4	22	396	241	1
hsa-miR-210-3p	chr7_65705311_65706257_+	150	-20.18	150	-20.18	22	946	357	1
hsa-miR-210-3p	chr7_65705311_65751696_+	150	-20.18	150	-20.18	22	1145	357	1
hsa-miR-210-3p	chr4_106155053_106158508_+	151	-24.69	151	-24.69	22	3455	2961	1
hsa-miR-211-5p	chr7_90355880_90419967_+	151	-20.55	151	-20.55	22	421	377	1
hsa-miR-211-5p	chr6_131276244_131277639_-	156	-20.22	156	-20.22	22	719	572	1
hsa-miR-211-5p	chr6_131247744_131277639_-	156	-20.22	156	-20.22	22	824	572	1
hsa-miR-211-5p	chr2_24357988_24369956_+	151	-24.66	151	-24.66	22	587	208	1
hsa-miR-211-5p	chr19_4511522_4511918_-	316	-42.83	164	-21.91	22	396	265 166	2
hsa-miR-211-3p	chr1_227192694_227204751_-	154	-27.33	154	-27.33	21	546	381	1
hsa-miR-211-3p	chr7_97820039_97823884_+	315	-51.61	163	-25.89	21	3109	1965 587	2
hsa-miR-211-3p	chr4_62800557_62910267_+	151	-23.54	151	-23.54	21	1702	740	1
hsa-miR-211-3p	chr17_67124759_67130883_-	151	-22.3	151	-22.3	21	659	472	1
hsa-miR-212-5p	chr6_118832460_118887479_-	157	-24.91	157	-24.91	23	1025	287	1
hsa-miR-212-5p	chr4_106155053_106158508_+	152	-20.59	152	-20.59	23	3455	3140	1
hsa-miR-212-3p	chr3_169694733_169706147_+	150	-21.8	150	-21.8	21	585	536	1
hsa-miR-214-5p	chr9_35546426_35548532_+	158	-27.48	158	-27.48	22	2106	152	1
hsa-miR-214-5p	chr3_114069120_114070725_-	159	-30.65	159	-30.65	22	1605	507	1
hsa-miR-214-3p	chr5_176963358_176966148_-	155	-24.59	155	-24.59	22	866	24	1
hsa-miR-214-3p	chr9_111812562_111812972_-	158	-24.84	158	-24.84	22	269	26	1
hsa-miR-215-3p	chr7_97820039_97823884_+	159	-21.95	159	-21.95	23	3109	551	1
hsa-miR-215-3p	chr3_169694733_169706147_+	153	-22.32	153	-22.32	23	585	498	1
hsa-miR-216a-3p	chr11_92085261_92088570_+	156	-21.88	156	-21.88	22	3309	1427	1
hsa-miR-216a-3p	chr7_65705311_65706257_+	168	-25.55	168	-25.55	22	946	234	1
hsa-miR-216a-3p	chr7_65705311_65751696_+	168	-25.55	168	-25.55	22	1145	234	1
hsa-miR-216a-3p	chr10_128768965_128788867_+	158	-22.82	158	-22.82	22	427	43	1
hsa-miR-216a-3p	chr4_73956383_73958017_-	158	-20.05	158	-20.05	22	1634	213	1
hsa-miR-216a-3p	chr5_176963358_176966148_-	155	-22.47	155	-22.47	22	866	782	1
hsa-miR-216a-3p	chr3_183361267_183369064_+	155	-25.39	155	-25.39	22	1044	846	1
hsa-miR-216a-3p	chr3_112968568_112969680_+	321	-53.26	170	-30.27	22	457	221 430	2
hsa-miR-217	chr11_92085261_92088570_+	151	-20.31	151	-20.31	23	3309	1243	1
hsa-miR-218-5p	chr10_32832227_32873232_+	155	-20.19	155	-20.19	21	597	121	1
hsa-miR-218-5p	chr4_62800557_62910267_+	155	-20.27	155	-20.27	21	1702	678	1
hsa-miR-218-1-3p	chr19_17212469_17213367_+	151	-20.87	151	-20.87	22	898	390	1
hsa-miR-218-1-3p	chr7_65705311_65706257_+	151	-20.69	151	-20.69	22	946	325	1
hsa-miR-218-1-3p	chr7_65705311_65751696_+	151	-20.69	151	-20.69	22	1145	325	1
hsa-miR-219a-1-3p	chr9_35546426_35548532_+	160	-23.62	160	-23.62	22	2106	973	1
hsa-miR-219a-1-3p	chr17_58012553_58018304_+	161	-24.69	161	-24.69	22	357	304	1
hsa-miR-221-5p	chr7_90355880_90419967_+	163	-22.24	163	-22.24	22	421	16	1
hsa-miR-221-3p	chr14_31596990_31602881_-	171	-26.89	171	-26.89	23	1403	1267	1
hsa-miR-222-5p	chr7_97820039_97823884_+	164	-25.54	164	-25.54	22	3109	204	1
hsa-miR-222-5p	chr8_17601112_17613470_-	152	-21.22	152	-21.22	22	2441	590	1
hsa-miR-223-5p	chr11_92085261_92088570_+	167	-25.64	167	-25.64	22	3309	2619	1
hsa-miR-200b-5p	chr4_106155053_106158508_+	151	-23.72	151	-23.72	22	3455	815	1
hsa-miR-200b-3p	chr3_18419661_18462483_-	153	-22.29	153	-22.29	22	1599	1184	1
hsa-let-7g-5p	chr14_31596990_31602881_-	170	-20.6	170	-20.6	22	1403	88	1
hsa-let-7i-5p	chr11_92085261_92088570_+	150	-22.58	150	-22.58	22	3309	2392	1
hsa-let-7i-5p	chr14_31596990_31602881_-	166	-22.24	166	-22.24	22	1403	86	1
hsa-let-7i-5p	chr3_3197902_3215945_-	150	-21.66	150	-21.66	22	576	102	1
hsa-miR-23b-5p	chr8_13356557_13357705_-	158	-25.02	158	-25.02	22	1148	1095	1
hsa-miR-23b-5p	chr9_4286037_4286523_-	152	-21.3	152	-21.3	22	486	128	1
hsa-miR-23b-5p	chr9_35546426_35548532_+	151	-21.75	151	-21.75	22	2106	789	1
hsa-miR-23b-5p	chr6_144858717_144864006_+	150	-27.71	150	-27.71	22	362	315	1
hsa-miR-23b-3p	chr16_31733946_31734674_+	164	-22.38	164	-22.38	21	223	175	1
hsa-miR-27b-5p	chr12_122825299_122826244_-	151	-20.95	151	-20.95	22	945	61	1
hsa-miR-27b-5p	chr5_176963358_176966148_-	152	-20.33	152	-20.33	22	866	379	1
hsa-miR-27b-3p	chr7_65705311_65706257_+	158	-21.3	158	-21.3	21	946	235	1
hsa-miR-27b-3p	chr7_65705311_65751696_+	158	-21.3	158	-21.3	21	1145	235	1
hsa-miR-27b-3p	chr8_17601112_17613470_-	156	-21.32	156	-21.32	21	2441	589	1
hsa-miR-27b-3p	chr3_112968568_112969680_+	160	-21.96	160	-21.96	21	457	429	1
hsa-miR-30b-3p	chr4_41015599_41016415_-	318	-45.74	164	-23.31	22	816	153 421	2
hsa-miR-30b-3p	chr8_22054192_22054933_+	157	-28.17	157	-28.17	22	342	246	1
hsa-miR-30b-3p	chr4_106155053_106158508_+	158	-20.07	158	-20.07	22	3455	97	1
hsa-miR-30b-3p	chr5_176963358_176966148_-	162	-23.02	162	-23.02	22	866	812	1
hsa-miR-30b-3p	chr7_97820039_97823884_+	155	-20.6	155	-20.6	22	3109	2189	1
hsa-miR-30b-3p	chr7_99621041_99621930_+	154	-26.37	154	-26.37	22	668	8	1
hsa-miR-30b-3p	chr16_53175090_53191453_+	151	-24.42	151	-24.42	22	1616	1230	1
hsa-miR-122-5p	chr5_65349233_65350779_+	154	-27.45	154	-27.45	22	1546	876	1
hsa-miR-124-5p	chr16_53288349_53308214_+	152	-20.69	152	-20.69	22	1106	696	1
hsa-miR-125b-5p	chr1_243776972_244006584_-	151	-30.64	151	-30.64	22	808	82	1
hsa-miR-125b-5p	chr1_243708811_244006584_-	151	-30.64	151	-30.64	22	1363	82	1
hsa-miR-128-1-5p	chr19_17212469_17213367_+	160	-36.94	160	-36.94	23	898	314	1
hsa-miR-128-1-5p	chr14_105412025_105412520_-	162	-29.5	162	-29.5	23	495	10	1
hsa-miR-128-1-5p	chr12_12022357_12022903_+	153	-21.15	153	-21.15	23	546	117	1
hsa-miR-128-3p	chr7_65705311_65706257_+	153	-22.7	153	-22.7	21	946	233	1
hsa-miR-128-3p	chr7_65705311_65751696_+	153	-22.7	153	-22.7	21	1145	233	1
hsa-miR-128-3p	chr10_128768965_128788867_+	158	-23.41	158	-23.41	21	427	42	1
hsa-miR-128-3p	chr3_112968568_112969680_+	153	-25.37	153	-25.37	21	457	219	1
hsa-miR-128-3p	chr3_3197902_3215945_-	155	-21.61	155	-21.61	21	576	510	1
hsa-miR-130a-5p	chr11_92085261_92088570_+	308	-46.41	156	-24.22	22	3309	2826 1149	2
hsa-miR-130a-5p	chr3_18419661_18462483_-	159	-21.01	159	-21.01	22	1599	64	1
hsa-miR-130a-5p	chr16_53175090_53191453_+	156	-23.15	156	-23.15	22	1616	519	1
hsa-miR-132-5p	chr7_99621041_99621930_+	163	-22.15	163	-22.15	22	668	99	1
hsa-miR-133a-3p	chr3_183361267_183369064_+	172	-22.2	172	-22.2	22	1044	923	1
hsa-miR-135a-3p	chr17_2297336_2298748_-	163	-20.45	163	-20.45	22	734	178	1
hsa-miR-138-5p	chr17_2297336_2298748_-	154	-23.68	154	-23.68	23	734	518	1
hsa-miR-138-5p	chr8_22054192_22054933_+	151	-21.84	151	-21.84	23	342	27	1
hsa-miR-138-5p	chr7_97820039_97823884_+	165	-23.29	165	-23.29	23	3109	692	1
hsa-miR-138-5p	chr6_107824860_107827631_+	156	-21.09	156	-21.09	23	325	301	1
hsa-miR-138-5p	chr7_33388679_33427756_+	151	-20.84	151	-20.84	23	786	88	1
hsa-miR-138-5p	chr3_100565215_100581229_-	151	-26.07	151	-26.07	23	513	417	1
hsa-miR-138-5p	chr3_100565215_100570784_-	151	-26.07	151	-26.07	23	438	342	1
hsa-miR-138-2-3p	chr7_97820039_97823884_+	160	-28.29	160	-28.29	22	3109	361	1
hsa-miR-138-2-3p	chr1_58971731_59004982_-	162	-20.17	162	-20.17	22	1381	985	1
hsa-miR-140-5p	chr12_12022357_12022903_+	151	-20.37	151	-20.37	22	546	250	1
hsa-miR-140-3p	chr12_129299319_129299615_-	151	-25.39	151	-25.39	21	296	164	1
hsa-miR-140-3p	chr17_2297336_2298748_-	156	-22.84	156	-22.84	21	734	188	1
hsa-miR-140-3p	chr7_104702610_104707254_+	156	-25.65	156	-25.65	21	426	10	1
hsa-miR-140-3p	chr7_104702610_104722244_+	156	-25.65	156	-25.65	21	1287	10	1
hsa-miR-140-3p	chr4_62800557_62910267_+	156	-22.71	156	-22.71	21	1702	476	1
hsa-miR-141-5p	chr11_92085261_92088570_+	166	-23.36	166	-23.36	22	3309	2126	1
hsa-miR-141-5p	chr18_77170402_77171501_+	150	-27.7	150	-27.7	22	1099	837	1
hsa-miR-141-3p	chr6_107824860_107827631_+	159	-22.9	159	-22.9	22	325	157	1
hsa-miR-142-3p	chr19_4511522_4511918_-	151	-22.59	151	-22.59	23	396	186	1
hsa-miR-143-5p	chr4_41015599_41016415_-	153	-26.65	153	-26.65	22	816	705	1
hsa-miR-143-5p	chr1_41536266_41541123_-	150	-30.75	150	-30.75	22	360	293	1
hsa-miR-143-5p	chr8_17601112_17613470_-	154	-24.44	154	-24.44	22	2441	643	1
hsa-miR-143-3p	chr4_73956383_73958017_-	159	-20.32	159	-20.32	21	1634	1483	1
hsa-miR-143-3p	chr9_14120438_14179779_-	157	-20.39	157	-20.39	21	683	488	1
hsa-miR-144-5p	chr8_22332466_22333137_+	171	-28.69	171	-28.69	22	323	192	1
hsa-miR-145-5p	chr19_17212469_17213367_+	151	-22.46	151	-22.46	23	898	672	1
hsa-miR-145-5p	chr9_35546426_35548532_+	155	-24.28	155	-24.28	23	2106	1736	1
hsa-miR-145-5p	chr17_60061531_60062451_-	155	-20.61	155	-20.61	23	503	441	1
hsa-miR-152-5p	chr3_114069120_114070725_-	152	-21.85	152	-21.85	23	1605	369	1
hsa-miR-153-5p	chr1_227192694_227204751_-	150	-20.1	150	-20.1	22	546	130	1
hsa-miR-191-3p	chrX_147743428_147744289_+	155	-26.92	155	-26.92	22	861	790	1
hsa-miR-191-3p	chr1_115005725_115007010_-	154	-20.25	154	-20.25	22	397	132	1
hsa-miR-191-3p	chr7_97820039_97823884_+	150	-21.89	150	-21.89	22	3109	449	1
hsa-miR-9-5p	chr6_131276244_131277639_-	158	-22.82	158	-22.82	23	719	164	1
hsa-miR-9-5p	chr6_131247744_131277639_-	158	-22.82	158	-22.82	23	824	164	1
hsa-miR-125a-5p	chr12_12022357_12022903_+	159	-22.23	159	-22.23	24	546	175	1
hsa-miR-125a-3p	chr8_141810557_141900868_-	160	-21.34	160	-21.34	22	1125	80	1
hsa-miR-125a-3p	chr12_95602618_95605043_-	175	-29.02	175	-29.02	22	2425	154	1
hsa-miR-125a-3p	chr6_107824860_107827631_+	156	-23.22	156	-23.22	22	325	231	1
hsa-miR-125a-3p	chr4_62800557_62910267_+	151	-21.56	151	-21.56	22	1702	940	1
hsa-miR-125a-3p	chr10_34558584_34573173_-	169	-26.45	169	-26.45	22	354	328	1
hsa-miR-125b-2-3p	chr7_23650789_23651172_+	150	-24.12	150	-24.12	22	383	72	1
hsa-miR-125b-2-3p	chr7_33388679_33427756_+	158	-23.68	158	-23.68	22	786	58	1
hsa-miR-127-5p	chr11_92085261_92088570_+	158	-24.83	158	-24.83	22	3309	2039	1
hsa-miR-127-5p	chr7_97820039_97823884_+	155	-22.33	155	-22.33	22	3109	1297	1
hsa-miR-134-5p	chr4_106155053_106158508_+	153	-22.58	153	-22.58	22	3455	3212	1
hsa-miR-134-5p	chr7_97820039_97823884_+	155	-31.24	155	-31.24	22	3109	1906	1
hsa-miR-134-3p	chr11_92085261_92088570_+	154	-24.3	154	-24.3	23	3309	2425	1
hsa-miR-134-3p	chr9_128419929_128434922_-	155	-22.9	155	-22.9	23	567	43	1
hsa-miR-134-3p	chr14_31596990_31602881_-	154	-27.31	154	-27.31	23	1403	285	1
hsa-miR-136-5p	chr4_106155053_106158508_+	170	-21.21	170	-21.21	23	3455	174	1
hsa-miR-136-5p	chr3_114069120_114070725_-	150	-23.84	150	-23.84	23	1605	781	1
hsa-miR-138-1-3p	chr13_61013821_61041513_+	153	-25.54	153	-25.54	22	454	404	1
hsa-miR-146a-5p	chr11_103173821_103194718_+	159	-22.58	159	-22.58	22	944	920	1
hsa-miR-146a-3p	chr10_126631025_126631876_+	166	-20.38	166	-20.38	22	851	713	1
hsa-miR-146a-3p	chr16_53288349_53308214_+	171	-24.95	171	-24.95	22	1106	609	1
hsa-miR-149-5p	chr9_35546426_35548532_+	324	-57.49	163	-30.64	23	2106	599 726	2
hsa-miR-149-5p	chr12_95602618_95605043_-	153	-30.54	153	-30.54	23	2425	2093	1
hsa-miR-149-5p	chr7_97820039_97823884_+	159	-24.43	159	-24.43	23	3109	2523	1
hsa-miR-149-5p	chr1_58971731_59004982_-	166	-24.24	166	-24.24	23	1381	1232	1
hsa-miR-149-5p	chr16_53288349_53308214_+	156	-22.99	156	-22.99	23	1106	78	1
hsa-miR-149-3p	chr13_76195898_76335174_+	319	-59.72	164	-32.41	21	652	234 305	2
hsa-miR-149-3p	chr4_41015599_41016415_-	150	-28.44	150	-28.44	21	816	95	1
hsa-miR-149-3p	chr17_80521229_80526077_+	170	-33.47	170	-33.47	21	343	160	1
hsa-miR-149-3p	chr21_38792600_38802702_+	155	-27.84	155	-27.84	21	86	14	1
hsa-miR-149-3p	chr4_73956383_73958017_-	150	-30.51	150	-30.51	21	1634	1043	1
hsa-miR-149-3p	chr11_89133184_89135710_-	150	-23.96	150	-23.96	21	445	24	1
hsa-miR-149-3p	chr1_171537385_171544267_+	157	-26.75	157	-26.75	21	397	102	1
hsa-miR-150-5p	chr2_200233327_200298237_-	155	-23	155	-23	22	531	480	1
hsa-miR-150-3p	chr18_77170402_77171501_+	168	-27.23	168	-27.23	22	1099	242	1
hsa-miR-154-5p	chr9_4286037_4286523_-	152	-21.14	152	-21.14	22	486	7	1
hsa-miR-185-5p	chr11_92085261_92088570_+	152	-22.47	152	-22.47	22	3309	3059	1
hsa-miR-185-5p	chr4_52729602_52758017_+	164	-23.82	164	-23.82	22	481	462	1
hsa-miR-185-3p	chrX_147743428_147744289_+	152	-22.36	152	-22.36	22	861	416	1
hsa-miR-185-3p	chr7_90355880_90419967_+	155	-23.91	155	-23.91	22	421	219	1
hsa-miR-185-3p	chr4_41015599_41016415_-	153	-25.43	153	-25.43	22	816	283	1
hsa-miR-185-3p	chr18_77170402_77171501_+	309	-52.53	156	-26.32	22	1099	663 931	2
hsa-miR-185-3p	chr7_65705311_65706257_+	167	-33.84	167	-33.84	22	946	542	1
hsa-miR-185-3p	chr7_65705311_65751696_+	167	-33.84	167	-33.84	22	1145	542	1
hsa-miR-185-3p	chr12_12022357_12022903_+	324	-50	164	-27.04	22	546	333 291	2
hsa-miR-185-3p	chr12_95602618_95605043_-	162	-25.83	162	-25.83	22	2425	43	1
hsa-miR-185-3p	chr7_97820039_97823884_+	154	-28.24	154	-28.24	22	3109	1508	1
hsa-miR-185-3p	chr22_32874967_32875262_+	150	-26.01	150	-26.01	22	295	248	1
hsa-miR-186-3p	chr3_133907680_133914026_-	154	-27.65	154	-27.65	22	323	228	1
hsa-miR-188-3p	chr16_31102095_31102663_-	150	-24.72	150	-24.72	21	501	291	1
hsa-miR-188-3p	chr7_24663284_24690331_+	157	-23.55	157	-23.55	21	653	499	1
hsa-miR-193a-5p	chr10_126631025_126631876_+	152	-24.69	152	-24.69	22	851	113	1
hsa-miR-193a-5p	chr19_17212469_17213367_+	150	-23.67	150	-23.67	22	898	777	1
hsa-miR-193a-5p	chr4_106155053_106158508_+	150	-20.85	150	-20.85	22	3455	2602	1
hsa-miR-206	chr11_92085261_92088570_+	155	-21.7	155	-21.7	22	3309	136	1
hsa-miR-206	chr7_65705311_65706257_+	160	-23.49	160	-23.49	22	946	368	1
hsa-miR-206	chr7_65705311_65751696_+	160	-23.49	160	-23.49	22	1145	368	1
hsa-miR-206	chr9_98740342_98766983_+	152	-23.5	152	-23.5	22	337	227	1
hsa-miR-320a	chr11_92085261_92088570_+	157	-20.43	157	-20.43	22	3309	2806	1
hsa-miR-320a	chr4_106155053_106158508_+	159	-20.57	159	-20.57	22	3455	3268	1
hsa-miR-320a	chr12_95602618_95605043_-	171	-23.23	171	-23.23	22	2425	660	1
hsa-miR-320a	chr8_17601112_17613470_-	158	-25.87	158	-25.87	22	2441	1201	1
hsa-miR-200c-3p	chr8_141810557_141900868_-	153	-22.21	153	-22.21	23	1125	174	1
hsa-miR-200c-3p	chr6_107824860_107827631_+	151	-28.04	151	-28.04	23	325	156	1
hsa-miR-1-5p	chr14_31596990_31602881_-	157	-21.9	157	-21.9	22	1403	131	1
hsa-miR-128-2-5p	chr14_105412025_105412520_-	152	-30.16	152	-30.16	23	495	10	1
hsa-miR-194-3p	chr8_13356557_13357705_-	155	-22.54	155	-22.54	22	1148	155	1
hsa-miR-194-3p	chr12_129299319_129299615_-	156	-20.49	156	-20.49	22	296	125	1
hsa-miR-194-3p	chr17_2297336_2298748_-	156	-20.77	156	-20.77	22	734	165	1
hsa-miR-194-3p	chr4_41015599_41016415_-	163	-22.01	163	-22.01	22	816	337	1
hsa-miR-194-3p	chr9_35546426_35548532_+	462	-76.92	158	-30.22	22	2106	1834 19 1495	3
hsa-miR-106b-3p	chr9_35546426_35548532_+	157	-24.75	157	-24.75	22	2106	627	1
hsa-miR-106b-3p	chr4_87614739_87622954_+	153	-24.32	153	-24.32	22	649	429	1
hsa-miR-106b-3p	chr4_48371865_48396670_+	151	-20.59	151	-20.59	22	971	254	1
hsa-miR-106b-3p	chr8_17570722_17581342_-	152	-28.05	152	-28.05	22	336	120	1
hsa-miR-29c-5p	chr4_48371865_48396670_+	163	-26.55	163	-26.55	22	971	27	1
hsa-miR-30c-1-3p	chr11_92085261_92088570_+	154	-21.08	154	-21.08	22	3309	89	1
hsa-miR-30c-1-3p	chr2_200233327_200298237_-	156	-24.27	156	-24.27	22	531	406	1
hsa-miR-30c-1-3p	chr1_114372213_114377061_-	153	-23.51	153	-23.51	22	356	179	1
hsa-miR-200a-3p	chr6_107824860_107827631_+	159	-20.66	159	-20.66	22	325	157	1
hsa-miR-302a-3p	chr4_62800557_62910267_+	152	-23.63	152	-23.63	23	1702	243	1
hsa-miR-34b-5p	chr12_129299319_129299615_-	150	-25.75	150	-25.75	23	296	76	1
hsa-miR-34b-5p	chr2_24357988_24369956_+	158	-22.65	158	-22.65	23	587	528	1
hsa-miR-34b-5p	chr17_67124759_67130883_-	157	-22.23	157	-22.23	23	659	75	1
hsa-miR-34b-5p	chr9_87317073_87325706_+	154	-20.1	154	-20.1	23	371	298	1
hsa-miR-34c-5p	chr17_80521229_80526077_+	166	-20.42	166	-20.42	23	343	26	1
hsa-miR-34c-5p	chr9_35546426_35548532_+	158	-21.03	158	-21.03	23	2106	821	1
hsa-miR-34c-5p	chr17_67124759_67130883_-	161	-24.52	161	-24.52	23	659	74	1
hsa-miR-299-5p	chr1_41536266_41541123_-	152	-21.68	152	-21.68	22	360	95	1
hsa-miR-99b-5p	chr3_114069120_114070725_-	158	-22.4	158	-22.4	22	1605	276	1
hsa-miR-296-5p	chr9_37424841_37426651_+	157	-28.17	157	-28.17	21	321	56	1
hsa-miR-296-5p	chr9_35546426_35548532_+	150	-25.89	150	-25.89	21	2106	1829	1
hsa-miR-296-3p	chr21_36206706_36231875_-	169	-31.94	169	-31.94	22	297	217	1
hsa-miR-296-3p	chr9_35546426_35548532_+	150	-31.87	150	-31.87	22	2106	1399	1
hsa-miR-296-3p	chr12_95602618_95605043_-	153	-29.88	153	-29.88	22	2425	1758	1
hsa-miR-130b-3p	chr2_190593385_190609514_+	151	-21.07	151	-21.07	22	1026	744	1
hsa-miR-30e-3p	chr13_76195898_76335174_+	155	-22.75	155	-22.75	22	652	571	1
hsa-miR-361-3p	chr11_92085261_92088570_+	152	-24.06	152	-24.06	23	3309	2900	1
hsa-miR-361-3p	chr4_106155053_106158508_+	163	-25.85	163	-25.85	23	3455	1867	1
hsa-miR-362-5p	chr13_61013821_61041513_+	152	-20.12	152	-20.12	24	454	214	1
hsa-miR-363-5p	chr3_133907680_133914026_-	153	-20.4	153	-20.4	22	323	26	1
hsa-miR-363-5p	chr14_31596990_31602881_-	151	-20.84	151	-20.84	22	1403	11	1
hsa-miR-363-3p	chr7_104702610_104722244_+	158	-25.9	158	-25.9	22	1287	481	1
hsa-miR-365a-5p	chr7_90355880_90419967_+	160	-22.6	160	-22.6	23	421	235	1
hsa-miR-365a-5p	chr19_17212469_17213367_+	153	-28.94	153	-28.94	23	898	611	1
hsa-miR-365a-5p	chr18_77170402_77171501_+	151	-21.45	151	-21.45	23	1099	857	1
hsa-miR-365a-5p	chr14_105412025_105412520_-	152	-27.64	152	-27.64	23	495	195	1
hsa-miR-365a-5p	chr14_89041036_89044484_+	154	-26.7	154	-26.7	23	418	345	1
hsa-miR-365a-5p	chr4_73956383_73958017_-	156	-25.12	156	-25.12	23	1634	1612	1
hsa-miR-365a-5p	chr7_97820039_97823884_+	162	-23.89	162	-23.89	23	3109	2719	1
hsa-miR-365b-5p	chr7_90355880_90419967_+	154	-23.47	154	-23.47	22	421	239	1
hsa-miR-365b-5p	chr18_77170402_77171501_+	161	-28.95	161	-28.95	22	1099	859	1
hsa-miR-365b-5p	chr14_89041036_89044484_+	155	-21.99	155	-21.99	22	418	347	1
hsa-miR-365b-5p	chr4_73956383_73958017_-	156	-25.07	156	-25.07	22	1634	1613	1
hsa-miR-365b-5p	chr7_97820039_97823884_+	313	-45.33	161	-24.72	22	3109	2720 995	2
hsa-miR-365b-5p	chr8_17601112_17613470_-	153	-21.13	153	-21.13	22	2441	1039	1
hsa-miR-302b-3p	chr4_62800557_62910267_+	156	-23.73	156	-23.73	23	1702	243	1
hsa-miR-302c-5p	chr11_120343758_120348235_+	154	-26.2	154	-26.2	22	577	47	1
hsa-miR-302c-5p	chr2_148653869_148657467_+	164	-20.98	164	-20.98	22	473	372	1
hsa-miR-302c-3p	chr4_62800557_62910267_+	160	-26.32	160	-26.32	23	1702	243	1
hsa-miR-302c-3p	chr2_190593385_190609514_+	151	-21.2	151	-21.2	23	1026	523	1
hsa-miR-302d-3p	chr4_62800557_62910267_+	152	-23.75	152	-23.75	23	1702	243	1
hsa-miR-302d-3p	chr4_87685745_87689129_+	151	-25.27	151	-25.27	23	487	163	1
hsa-miR-367-3p	chr3_3197902_3215945_-	150	-21.02	150	-21.02	22	576	356	1
hsa-miR-370-5p	chr6_131276244_131277639_-	151	-20.63	151	-20.63	22	719	695	1
hsa-miR-370-5p	chr6_131247744_131277639_-	151	-20.63	151	-20.63	22	824	695	1
hsa-miR-370-5p	chr16_53288349_53308214_+	151	-24.77	151	-24.77	22	1106	573	1
hsa-miR-370-5p	chr19_4511522_4511918_-	150	-26.54	150	-26.54	22	396	142	1
hsa-miR-370-3p	chr12_122825299_122826244_-	153	-25.98	153	-25.98	22	945	384	1
hsa-miR-370-3p	chr17_2297336_2298748_-	154	-26.29	154	-26.29	22	734	327	1
hsa-miR-370-3p	chr19_17212469_17213367_+	156	-27.25	156	-27.25	22	898	474	1
hsa-miR-370-3p	chr4_73956383_73958017_-	153	-26.25	153	-26.25	22	1634	543	1
hsa-miR-370-3p	chr19_13039155_13039661_-	151	-29.85	151	-29.85	22	338	278	1
hsa-miR-370-3p	chr7_97820039_97823884_+	317	-52.21	162	-30.77	22	3109	2554 1715	2
hsa-miR-370-3p	chr5_65349233_65350779_+	152	-28.68	152	-28.68	22	1546	1234	1
hsa-miR-370-3p	chr1_185183638_185200840_+	163	-29.04	163	-29.04	22	469	259	1
hsa-miR-370-3p	chr3_112968568_112969680_+	151	-26.22	151	-26.22	22	457	140	1
hsa-miR-371a-5p	chr8_22054192_22054933_+	150	-20.92	150	-20.92	20	342	119	1
hsa-miR-371a-5p	chr8_17601112_17613470_-	165	-24.02	165	-24.02	20	2441	2294	1
hsa-miR-371a-3p	chr7_90355880_90419967_+	166	-25.81	166	-25.81	23	421	211	1
hsa-miR-372-3p	chr3_18419661_18462483_-	156	-22.55	156	-22.55	23	1599	1547	1
hsa-miR-372-3p	chr4_73956383_73958017_-	155	-20.17	155	-20.17	23	1634	207	1
hsa-miR-373-3p	chr4_106155053_106158508_+	163	-24.48	163	-24.48	23	3455	2130	1
hsa-miR-373-3p	chr8_17570722_17581342_-	159	-24.07	159	-24.07	23	336	127	1
hsa-miR-373-3p	chr5_102432244_102433485_-	156	-23.68	156	-23.68	23	655	85	1
hsa-miR-373-3p	chr9_14120438_14179779_-	170	-26.19	170	-26.19	23	683	433	1
hsa-miR-375	chr6_73005639_73043538_+	153	-20.06	153	-20.06	22	546	39	1
hsa-miR-376a-5p	chr16_53175090_53191453_+	154	-24.69	154	-24.69	22	1616	1100	1
hsa-miR-376a-5p	chr1_243708811_244006584_-	170	-22.87	170	-22.87	22	1363	924	1
hsa-miR-377-5p	chr19_17212469_17213367_+	178	-32.85	178	-32.85	22	898	524	1
hsa-miR-377-3p	chr3_112968568_112969680_+	164	-20.82	164	-20.82	22	457	14	1
hsa-miR-378a-5p	chr9_35546426_35548532_+	151	-21.96	151	-21.96	22	2106	341	1
hsa-miR-378a-3p	chrX_147743428_147744289_+	152	-21.44	152	-21.44	22	861	15	1
hsa-miR-378a-3p	chr12_12022357_12022903_+	150	-22.21	150	-22.21	22	546	386	1
hsa-miR-378a-3p	chr11_120343758_120348235_+	155	-21.31	155	-21.31	22	577	555	1
hsa-miR-378a-3p	chr7_99621041_99621930_+	150	-26.36	150	-26.36	22	668	561	1
hsa-miR-380-5p	chr3_18419661_18462483_-	153	-20.22	153	-20.22	22	1599	958	1
hsa-miR-380-3p	chr2_190593385_190609514_+	160	-25.4	160	-25.4	22	1026	577	1
hsa-miR-381-5p	chr4_48371865_48396670_+	155	-20.06	155	-20.06	22	971	758	1
hsa-miR-382-5p	chr9_4286037_4286523_-	156	-23.93	156	-23.93	22	486	7	1
hsa-miR-382-5p	chr7_65705311_65706257_+	180	-25.92	180	-25.92	22	946	807	1
hsa-miR-382-5p	chr7_65705311_65751696_+	180	-25.92	180	-25.92	22	1145	807	1
hsa-miR-383-5p	chr1_227192694_227204751_-	155	-21.38	155	-21.38	22	546	264	1
hsa-miR-383-5p	chr12_12022357_12022903_+	171	-22.38	171	-22.38	22	546	350	1
hsa-miR-383-5p	chr5_65349233_65350779_+	150	-20.71	150	-20.71	22	1546	699	1
hsa-miR-383-3p	chr9_35546426_35548532_+	166	-27.92	166	-27.92	19	2106	165	1
hsa-miR-340-3p	chr19_22157530_22171711_-	159	-22.87	159	-22.87	22	302	187	1
hsa-miR-340-3p	chr8_17601112_17613470_-	155	-24.3	155	-24.3	22	2441	1257	1
hsa-miR-330-5p	chr19_17212469_17213367_+	158	-21.17	158	-21.17	22	898	782	1
hsa-miR-330-5p	chr9_35546426_35548532_+	152	-22.7	152	-22.7	22	2106	2063	1
hsa-miR-330-5p	chr4_106155053_106158508_+	154	-30.93	154	-30.93	22	3455	1408	1
hsa-miR-330-5p	chr12_95602618_95605043_-	155	-23.07	155	-23.07	22	2425	1774	1
hsa-miR-330-5p	chr19_13039155_13039661_-	157	-29.4	157	-29.4	22	338	58	1
hsa-miR-330-5p	chr7_99621041_99621930_+	152	-25.61	152	-25.61	22	668	227	1
hsa-miR-330-5p	chr10_32854485_32873232_+	157	-25.27	157	-25.27	22	536	176	1
hsa-miR-330-3p	chr3_112968568_112969680_+	151	-21.85	151	-21.85	23	457	152	1
hsa-miR-330-3p	chr13_61013821_61041513_+	150	-26.83	150	-26.83	23	454	149	1
hsa-miR-328-5p	chr13_76195898_76335174_+	155	-35.08	155	-35.08	23	652	232	1
hsa-miR-328-5p	chr3_18419661_18462483_-	164	-38.8	164	-38.8	23	1599	1387	1
hsa-miR-328-5p	chr21_36206706_36231875_-	151	-35.46	151	-35.46	23	297	228	1
hsa-miR-328-5p	chr17_2297336_2298748_-	620	-135.12	161	-36.22	23	734	470 315 350 413	4
hsa-miR-328-5p	chr17_80521229_80526077_+	157	-37.69	157	-37.69	23	343	204	1
hsa-miR-328-5p	chr18_77170402_77171501_+	150	-28.87	150	-28.87	23	1099	932	1
hsa-miR-328-5p	chr12_12022357_12022903_+	162	-40.57	162	-40.57	23	546	128	1
hsa-miR-328-5p	chr5_176963358_176966148_-	464	-103.09	157	-35.38	23	866	673 584 511	3
hsa-miR-328-5p	chr7_97820039_97823884_+	150	-28.81	150	-28.81	23	3109	2053	1
hsa-miR-328-3p	chr3_171969049_171979873_+	151	-21.68	151	-21.68	22	282	155	1
hsa-miR-328-3p	chr14_105412025_105412520_-	163	-24.81	163	-24.81	22	495	357	1
hsa-miR-328-3p	chr8_17601112_17613470_-	155	-27.89	155	-27.89	22	2441	524	1
hsa-miR-342-5p	chr9_35546426_35548532_+	155	-21.8	155	-21.8	21	2106	957	1
hsa-miR-342-5p	chr8_17570722_17581342_-	163	-24.43	163	-24.43	21	336	96	1
hsa-miR-342-3p	chr8_141810557_141900868_-	155	-21.77	155	-21.77	23	1125	334	1
hsa-miR-337-3p	chr16_53288349_53308214_+	162	-20.5	162	-20.5	22	1106	783	1
hsa-miR-323a-5p	chr18_77170402_77171501_+	309	-53.42	159	-27.9	22	1099	819 108	2
hsa-miR-323a-5p	chr8_131370262_131374017_-	150	-25.28	150	-25.28	22	229	126	1
hsa-miR-323a-5p	chr5_176963358_176966148_-	154	-23.76	154	-23.76	22	866	532	1
hsa-miR-323a-5p	chr7_97820039_97823884_+	153	-40.29	153	-40.29	22	3109	462	1
hsa-miR-323a-5p	chr3_114069120_114070725_-	158	-27.89	158	-27.89	22	1605	621	1
hsa-miR-326	chr14_105412025_105412520_-	156	-28.83	156	-28.83	20	495	352	1
hsa-miR-135b-3p	chr19_13039155_13039661_-	159	-23.44	159	-23.44	22	338	108	1
hsa-miR-135b-3p	chr5_102432244_102433485_-	159	-24.61	159	-24.61	22	655	614	1
hsa-miR-148b-5p	chr7_97820039_97823884_+	157	-25.14	157	-25.14	22	3109	2603	1
hsa-miR-331-3p	chr17_2297336_2298748_-	153	-28.14	153	-28.14	21	734	561	1
hsa-miR-331-3p	chr6_73005639_73043538_+	151	-22.6	151	-22.6	21	546	282	1
hsa-miR-324-5p	chr9_35546426_35548532_+	161	-25.64	161	-25.64	23	2106	2068	1
hsa-miR-324-5p	chr4_73956383_73958017_-	152	-21.01	152	-21.01	23	1634	1150	1
hsa-miR-324-3p	chrX_147743428_147744289_+	152	-20.68	152	-20.68	20	861	650	1
hsa-miR-324-3p	chr1_236969443_236979843_+	150	-22.4	150	-22.4	20	572	4	1
hsa-miR-339-5p	chr7_30590251_30601744_-	150	-27.57	150	-27.57	23	308	33	1
hsa-miR-339-5p	chr11_89165951_89185063_-	161	-29.88	161	-29.88	23	395	317	1
hsa-miR-339-5p	chr11_89155069_89185063_-	161	-29.88	161	-29.88	23	476	317	1
hsa-miR-339-5p	chr8_17570722_17581342_-	155	-28.04	155	-28.04	23	336	87	1
hsa-miR-339-3p	chr11_120343758_120348235_+	151	-21.45	151	-21.45	23	577	344	1
hsa-miR-335-3p	chr11_120343758_120348235_+	157	-21.15	157	-21.15	22	577	494	1
hsa-miR-335-3p	chr14_31596990_31602881_-	154	-22.76	154	-22.76	22	1403	495	1
hsa-miR-133b	chr3_183361267_183369064_+	172	-22.2	172	-22.2	22	1044	923	1
hsa-miR-325	chr19_13039155_13039661_-	150	-23.95	150	-23.95	23	338	1	1
hsa-miR-325	chr5_102432244_102433485_-	157	-20.26	157	-20.26	23	655	182	1
hsa-miR-345-5p	chr21_36206706_36231875_-	154	-20.75	154	-20.75	22	297	269	1
hsa-miR-345-5p	chr9_35546426_35548532_+	151	-27.12	151	-27.12	22	2106	338	1
hsa-miR-345-5p	chr7_97820039_97823884_+	162	-30.67	162	-30.67	22	3109	1986	1
hsa-miR-345-5p	chr8_17601112_17613470_-	152	-20.24	152	-20.24	22	2441	681	1
hsa-miR-345-5p	chr1_171537385_171544267_+	151	-21.89	151	-21.89	22	397	274	1
hsa-miR-345-3p	chr14_105412025_105412520_-	155	-30.79	155	-30.79	22	495	175	1
hsa-miR-345-3p	chr7_30590251_30601744_-	171	-27.83	171	-27.83	22	308	129	1
hsa-miR-345-3p	chr12_95602618_95605043_-	153	-21.59	153	-21.59	22	2425	1700	1
hsa-miR-345-3p	chr4_62800557_62910267_+	157	-22.21	157	-22.21	22	1702	1536	1
hsa-miR-196b-3p	chr9_35546426_35548532_+	159	-31.95	159	-31.95	22	2106	46	1
hsa-miR-422a	chr17_2297336_2298748_-	157	-24.03	157	-24.03	22	734	455	1
hsa-miR-422a	chr4_41015599_41016415_-	155	-21.86	155	-21.86	22	816	612	1
hsa-miR-422a	chr9_35546426_35548532_+	151	-20.38	151	-20.38	22	2106	1432	1
hsa-miR-423-5p	chr9_4286037_4286523_-	150	-25.33	150	-25.33	23	486	199	1
hsa-miR-423-5p	chr17_80521229_80526077_+	156	-24.74	156	-24.74	23	343	196	1
hsa-miR-423-5p	chr12_95602618_95605043_-	161	-26.86	161	-26.86	23	2425	1398	1
hsa-miR-423-5p	chr4_73956383_73958017_-	153	-23.75	153	-23.75	23	1634	1215	1
hsa-miR-423-5p	chr7_33388679_33427756_+	156	-25.24	156	-25.24	23	786	725	1
hsa-miR-423-3p	chr4_41015599_41016415_-	150	-24.97	150	-24.97	23	816	728	1
hsa-miR-423-3p	chr7_97820039_97823884_+	155	-24.65	155	-24.65	23	3109	2928	1
hsa-miR-423-3p	chr3_114069120_114070725_-	151	-26.42	151	-26.42	23	1605	12	1
hsa-miR-423-3p	chr16_53288349_53308214_+	160	-22.12	160	-22.12	23	1106	77	1
hsa-miR-424-5p	chr14_31596990_31602881_-	162	-23.05	162	-23.05	22	1403	525	1
hsa-miR-425-5p	chr5_102432244_102433485_-	164	-22.54	164	-22.54	23	655	516	1
hsa-miR-425-3p	chr5_65349233_65350779_+	150	-27.14	150	-27.14	22	1546	1196	1
hsa-miR-20b-3p	chr7_90355880_90419967_+	151	-27.19	151	-27.19	22	421	301	1
hsa-miR-20b-3p	chr4_186168447_186188309_+	169	-26.67	169	-26.67	22	662	79	1
hsa-miR-20b-3p	chr3_183361267_183369064_+	154	-20.24	154	-20.24	22	1044	501	1
hsa-miR-448	chr11_89165951_89185063_-	164	-20.67	164	-20.67	22	395	368	1
hsa-miR-448	chr11_89155069_89185063_-	164	-20.67	164	-20.67	22	476	368	1
hsa-miR-449a	chr9_35546426_35548532_+	154	-21.89	154	-21.89	22	2106	824	1
hsa-miR-431-5p	chr19_17212469_17213367_+	150	-20.13	150	-20.13	21	898	774	1
hsa-miR-431-5p	chr5_65349233_65350779_+	152	-21.05	152	-21.05	21	1546	1053	1
hsa-miR-431-3p	chr14_31596990_31602881_-	159	-22.43	159	-22.43	22	1403	922	1
hsa-miR-433-5p	chr7_97820039_97823884_+	155	-22.39	155	-22.39	22	3109	375	1
hsa-miR-433-5p	chr3_112968568_112969680_+	151	-20.3	151	-20.3	22	457	181	1
hsa-miR-433-3p	chr6_73005639_73043538_+	159	-20.74	159	-20.74	22	546	350	1
hsa-miR-433-3p	chr1_243776972_244006584_-	163	-25.62	163	-25.62	22	808	97	1
hsa-miR-433-3p	chr1_243708811_244006584_-	163	-25.62	163	-25.62	22	1363	97	1
hsa-miR-433-3p	chr10_49609654_49618211_+	157	-20.47	157	-20.47	22	499	404	1
hsa-miR-329-5p	chr4_41015599_41016415_-	168	-21.47	168	-21.47	23	816	323	1
hsa-miR-329-5p	chr12_95602618_95605043_-	157	-22.58	157	-22.58	23	2425	147	1
hsa-miR-329-5p	chr6_131276244_131277639_-	167	-21.81	167	-21.81	23	719	69	1
hsa-miR-329-5p	chr6_131247744_131277639_-	167	-21.81	167	-21.81	23	824	69	1
hsa-miR-329-5p	chr11_89165951_89185063_-	158	-23.54	158	-23.54	23	395	288	1
hsa-miR-329-5p	chr4_62800557_62910267_+	165	-24.94	165	-24.94	23	1702	209	1
hsa-miR-329-5p	chr11_89155069_89185063_-	158	-23.54	158	-23.54	23	476	288	1
hsa-miR-412-3p	chr9_35546426_35548532_+	150	-25.94	150	-25.94	23	2106	177	1
hsa-miR-412-3p	chr4_106155053_106158508_+	157	-20.28	157	-20.28	23	3455	1078	1
hsa-miR-412-3p	chr1_236969443_236979843_+	160	-22.37	160	-22.37	23	572	288	1
hsa-miR-483-5p	chr1_227192694_227204751_-	152	-23.99	152	-23.99	22	546	366	1
hsa-miR-483-3p	chr16_31733946_31734674_+	151	-24.56	151	-24.56	21	223	31	1
hsa-miR-484	chr9_111812562_111812972_-	151	-20.37	151	-20.37	22	269	24	1
hsa-miR-485-5p	chr17_2297336_2298748_-	151	-25.72	151	-25.72	22	734	248	1
hsa-miR-485-5p	chr8_131370262_131374017_-	153	-21.91	153	-21.91	22	229	161	1
hsa-miR-485-5p	chr11_89165951_89185063_-	163	-24.27	163	-24.27	22	395	358	1
hsa-miR-485-5p	chr11_89155069_89185063_-	163	-24.27	163	-24.27	22	476	358	1
hsa-miR-486-5p	chr3_3197902_3215945_-	151	-20.48	151	-20.48	22	576	194	1
hsa-miR-486-3p	chr4_106155053_106158508_+	154	-28.58	154	-28.58	21	3455	880	1
hsa-miR-486-3p	chr5_176963358_176966148_-	152	-22.05	152	-22.05	21	866	102	1
hsa-miR-486-3p	chr3_114069120_114070725_-	157	-27.78	157	-27.78	21	1605	613	1
hsa-miR-486-3p	chr7_24663284_24690331_+	157	-27.59	157	-27.59	21	653	21	1
hsa-miR-487a-3p	chr9_35546426_35548532_+	166	-23.02	166	-23.02	22	2106	430	1
hsa-miR-487a-3p	chr4_106155053_106158508_+	151	-22.43	151	-22.43	22	3455	226	1
hsa-miR-487a-3p	chr1_58971731_59004982_-	167	-22.68	167	-22.68	22	1381	1053	1
hsa-miR-488-5p	chr16_31102095_31102663_-	150	-21.35	150	-21.35	21	501	267	1
hsa-miR-488-3p	chrX_147743428_147744289_+	171	-23.08	171	-23.08	21	861	599	1
hsa-miR-488-3p	chr3_18419661_18462483_-	162	-24.25	162	-24.25	21	1599	639	1
hsa-miR-489-3p	chr14_31596990_31602881_-	152	-20.3	152	-20.3	22	1403	341	1
hsa-miR-490-3p	chr3_18419661_18462483_-	154	-21.81	154	-21.81	22	1599	406	1
hsa-miR-490-3p	chr11_103173821_103194718_+	165	-25.1	165	-25.1	22	944	388	1
hsa-miR-490-3p	chr9_14120438_14179779_-	168	-22.3	168	-22.3	22	683	37	1
hsa-miR-491-5p	chr12_129299319_129299615_-	154	-20.96	154	-20.96	22	296	120	1
hsa-miR-491-5p	chr5_176963358_176966148_-	154	-25.93	154	-25.93	22	866	408	1
hsa-miR-491-5p	chr11_103173821_103194718_+	159	-23.64	159	-23.64	22	944	1	1
hsa-miR-511-5p	chr5_65349233_65350779_+	158	-21.55	158	-21.55	21	1546	861	1
hsa-miR-202-3p	chr4_106155053_106158508_+	154	-20.25	154	-20.25	20	3455	842	1
hsa-miR-202-3p	chr11_120343758_120348235_+	154	-20.19	154	-20.19	20	577	15	1
hsa-miR-493-3p	chr14_89041036_89044484_+	155	-20.38	155	-20.38	22	418	147	1
hsa-miR-493-3p	chr1_115005725_115007010_-	153	-21.64	153	-21.64	22	397	33	1
hsa-miR-432-5p	chr4_73956383_73958017_-	174	-30.02	174	-30.02	23	1634	1605	1
hsa-miR-432-5p	chr22_32874967_32875262_+	161	-24.54	161	-24.54	23	295	233	1
hsa-miR-432-5p	chr3_133907680_133914026_-	168	-22.9	168	-22.9	23	323	212	1
hsa-miR-432-5p	chr8_17601112_17613470_-	158	-30	158	-30	23	2441	1657	1
hsa-miR-432-5p	chr1_243776972_244006584_-	154	-23.2	154	-23.2	23	808	64	1
hsa-miR-432-5p	chr1_243708811_244006584_-	154	-23.2	154	-23.2	23	1363	64	1
hsa-miR-432-5p	chr4_62800557_62910267_+	162	-25.38	162	-25.38	23	1702	546	1
hsa-miR-432-5p	chr9_87317073_87325706_+	150	-20.23	150	-20.23	23	371	260	1
hsa-miR-432-5p	chr4_103225473_103236987_-	156	-24.51	156	-24.51	23	621	47	1
hsa-miR-432-3p	chr16_31733946_31734674_+	157	-25.2	157	-25.2	21	223	199	1
hsa-miR-432-3p	chr4_62800557_62910267_+	150	-22.31	150	-22.31	21	1702	250	1
hsa-miR-432-3p	chr2_190593385_190609514_+	171	-28.59	171	-28.59	21	1026	987	1
hsa-miR-432-3p	chr19_4511522_4511918_-	162	-25.91	162	-25.91	21	396	170	1
hsa-miR-494-5p	chr13_76195898_76335174_+	161	-25.08	161	-25.08	23	652	264	1
hsa-miR-494-5p	chr12_95602618_95605043_-	151	-22.95	151	-22.95	23	2425	575	1
hsa-miR-193b-5p	chr7_97820039_97823884_+	159	-29.67	159	-29.67	22	3109	1971	1
hsa-miR-193b-5p	chr7_99621041_99621930_+	158	-28.61	158	-28.61	22	668	630	1
hsa-miR-193b-5p	chr7_104702610_104722244_+	152	-24.04	152	-24.04	22	1287	900	1
hsa-miR-497-5p	chr5_176963358_176966148_-	150	-20.96	150	-20.96	21	866	661	1
hsa-miR-497-5p	chr5_65349233_65350779_+	153	-21.2	153	-21.2	21	1546	610	1
hsa-miR-497-5p	chr14_31596990_31602881_-	150	-20.7	150	-20.7	21	1403	527	1
hsa-miR-181d-5p	chr19_17212469_17213367_+	151	-24.72	151	-24.72	23	898	46	1
hsa-miR-181d-5p	chr19_4511522_4511918_-	159	-24.63	159	-24.63	23	396	56	1
hsa-miR-181d-3p	chr5_176963358_176966148_-	151	-20.76	151	-20.76	21	866	463	1
hsa-miR-512-3p	chr9_4286037_4286523_-	151	-27.54	151	-27.54	22	486	215	1
hsa-miR-512-3p	chr9_35546426_35548532_+	151	-20.32	151	-20.32	22	2106	821	1
hsa-miR-512-3p	chr4_106155053_106158508_+	159	-20.78	159	-20.78	22	3455	2131	1
hsa-miR-512-3p	chr12_95602618_95605043_-	152	-22.23	152	-22.23	22	2425	1251	1
hsa-miR-512-3p	chr4_73956383_73958017_-	159	-21.56	159	-21.56	22	1634	207	1
hsa-miR-520e	chr9_14120438_14179779_-	155	-20.81	155	-20.81	21	683	434	1
hsa-miR-515-5p	chr3_133907680_133914026_-	160	-23.33	160	-23.33	24	323	144	1
hsa-miR-515-3p	chr8_13356557_13357705_-	166	-22.52	166	-22.52	22	1148	556	1
hsa-miR-515-3p	chr3_133907680_133914026_-	151	-24.57	151	-24.57	22	323	223	1
hsa-miR-515-3p	chr14_31596990_31602881_-	164	-23.09	164	-23.09	22	1403	302	1
hsa-miR-515-3p	chr3_112968568_112969680_+	157	-23.9	157	-23.9	22	457	214	1
hsa-miR-519e-5p	chr3_133907680_133914026_-	163	-25.06	163	-25.06	22	323	146	1
hsa-miR-519e-3p	chr8_17601112_17613470_-	152	-23.9	152	-23.9	22	2441	1546	1
hsa-miR-520f-3p	chr4_106155053_106158508_+	163	-23.43	163	-23.43	22	3455	1298	1
hsa-miR-520f-3p	chr2_24357988_24369956_+	150	-21.77	150	-21.77	22	587	364	1
hsa-miR-519c-3p	chr4_106155053_106158508_+	164	-20.31	164	-20.31	22	3455	2011	1
hsa-miR-520a-5p	chr19_22157530_22171711_-	161	-23.17	161	-23.17	21	302	26	1
hsa-miR-520a-5p	chr4_52729602_52758017_+	161	-24.51	161	-24.51	21	481	173	1
hsa-miR-520a-5p	chr1_243708811_244006584_-	153	-20.71	153	-20.71	21	1363	1315	1
hsa-miR-520a-5p	chr17_67124759_67130883_-	158	-22.87	158	-22.87	21	659	587	1
hsa-miR-520a-3p	chr7_90355880_90419967_+	159	-24.71	159	-24.71	22	421	91	1
hsa-miR-526b-3p	chr12_122825299_122826244_-	153	-20.46	153	-20.46	22	945	207	1
hsa-miR-525-5p	chr7_99621041_99621930_+	150	-23.75	150	-23.75	21	668	548	1
hsa-miR-525-5p	chr19_22157530_22171711_-	151	-22.17	151	-22.17	21	302	25	1
hsa-miR-525-5p	chr4_52729602_52758017_+	153	-22.93	153	-22.93	21	481	173	1
hsa-miR-525-3p	chr12_95602618_95605043_-	152	-25.51	152	-25.51	22	2425	500	1
hsa-miR-518f-3p	chr12_95602618_95605043_-	163	-20.96	163	-20.96	21	2425	501	1
hsa-miR-518f-3p	chr4_62800557_62910267_+	151	-22.13	151	-22.13	21	1702	106	1
hsa-miR-518b	chr4_62800557_62910267_+	152	-20.69	152	-20.69	22	1702	105	1
hsa-miR-518c-5p	chr3_114069120_114070725_-	166	-35.37	166	-35.37	23	1605	1081	1
hsa-miR-518c-5p	chr6_131276244_131277639_-	161	-29.08	161	-29.08	23	719	117	1
hsa-miR-518c-5p	chr6_131247744_131277639_-	161	-29.08	161	-29.08	23	824	117	1
hsa-miR-518c-5p	chr7_104702610_104722244_+	159	-23.72	159	-23.72	23	1287	691	1
hsa-miR-518c-3p	chr12_95602618_95605043_-	165	-20.1	165	-20.1	23	2425	499	1
hsa-miR-518c-3p	chr1_58971731_59004982_-	155	-21.6	155	-21.6	23	1381	798	1
hsa-miR-518c-3p	chr4_62800557_62910267_+	161	-23.3	161	-23.3	23	1702	104	1
hsa-miR-524-3p	chr12_129299319_129299615_-	151	-25.02	151	-25.02	21	296	205	1
hsa-miR-519d-5p	chr3_133907680_133914026_-	159	-25.73	159	-25.73	25	323	142	1
hsa-miR-519d-3p	chr12_122825299_122826244_-	152	-24.05	152	-24.05	22	945	207	1
hsa-miR-520d-3p	chr8_17570722_17581342_-	157	-22.98	157	-22.98	22	336	129	1
hsa-miR-520d-3p	chr9_14120438_14179779_-	156	-20.65	156	-20.65	22	683	433	1
hsa-miR-520g-3p	chr12_122825299_122826244_-	162	-25.1	162	-25.1	24	945	206	1
hsa-miR-516b-5p	chr18_77170402_77171501_+	150	-22.05	150	-22.05	22	1099	628	1
hsa-miR-516b-3p	chr3_18419661_18462483_-	152	-23.3	152	-23.3	18	1599	1246	1
hsa-miR-516b-3p	chr14_89041036_89044484_+	153	-20.67	153	-20.67	18	418	104	1
hsa-miR-516b-3p	chr4_73956383_73958017_-	163	-22.97	163	-22.97	18	1634	892	1
hsa-miR-518e-3p	chr4_62800557_62910267_+	159	-26.5	159	-26.5	21	1702	105	1
hsa-miR-518a-3p	chr4_62800557_62910267_+	156	-21.06	156	-21.06	22	1702	105	1
hsa-miR-518d-3p	chr12_95602618_95605043_-	163	-22.05	163	-22.05	21	2425	501	1
hsa-miR-518d-3p	chr4_62800557_62910267_+	151	-20.62	151	-20.62	21	1702	106	1
hsa-miR-517c-3p	chr9_35546426_35548532_+	155	-26.47	155	-26.47	22	2106	307	1
hsa-miR-520h	chr12_122825299_122826244_-	157	-25.1	157	-25.1	22	945	208	1
hsa-miR-519a-3p	chr3_133907680_133914026_-	150	-21.91	150	-21.91	22	323	210	1
hsa-miR-516a-3p	chr3_18419661_18462483_-	152	-23.3	152	-23.3	18	1599	1246	1
hsa-miR-516a-3p	chr14_89041036_89044484_+	153	-20.67	153	-20.67	18	418	104	1
hsa-miR-516a-3p	chr4_73956383_73958017_-	163	-22.97	163	-22.97	18	1634	892	1
hsa-miR-500a-3p	chr3_18419661_18462483_-	151	-21.19	151	-21.19	22	1599	150	1
hsa-miR-500a-3p	chr4_106155053_106158508_+	162	-21.27	162	-21.27	22	3455	2007	1
hsa-miR-501-5p	chr6_107824860_107827631_+	179	-32.82	179	-32.82	22	325	242	1
hsa-miR-502-5p	chr11_92085261_92088570_+	161	-21.75	161	-21.75	21	3309	177	1
hsa-miR-502-5p	chr6_131276244_131277639_-	162	-20.53	162	-20.53	21	719	453	1
hsa-miR-502-5p	chr6_131247744_131277639_-	162	-20.53	162	-20.53	21	824	453	1
hsa-miR-450a-2-3p	chr17_2297336_2298748_-	162	-20.12	162	-20.12	22	734	654	1
hsa-miR-450a-2-3p	chr12_95602618_95605043_-	165	-20.05	165	-20.05	22	2425	1454	1
hsa-miR-450a-2-3p	chr3_183361267_183369064_+	179	-25.39	179	-25.39	22	1044	1007	1
hsa-miR-450a-2-3p	chr8_17601112_17613470_-	159	-21.3	159	-21.3	22	2441	1041	1
hsa-miR-450a-2-3p	chr4_48371865_48396670_+	151	-24.43	151	-24.43	22	971	723	1
hsa-miR-503-5p	chr8_131370262_131374017_-	155	-28.45	155	-28.45	23	229	199	1
hsa-miR-503-5p	chr19_13039155_13039661_-	156	-24	156	-24	23	338	157	1
hsa-miR-503-5p	chr4_62800557_62910267_+	152	-25.88	152	-25.88	23	1702	906	1
hsa-miR-504-5p	chr9_4286037_4286523_-	166	-24.88	166	-24.88	22	486	405	1
hsa-miR-504-5p	chr7_65705311_65706257_+	172	-25.65	172	-25.65	22	946	390	1
hsa-miR-504-5p	chr7_65705311_65751696_+	172	-25.65	172	-25.65	22	1145	390	1
hsa-miR-504-5p	chr6_73005639_73043538_+	157	-25.04	157	-25.04	22	546	81	1
hsa-miR-504-3p	chr12_12022357_12022903_+	158	-27.57	158	-27.57	21	546	366	1
hsa-miR-504-3p	chr5_65349233_65350779_+	151	-22.04	151	-22.04	21	1546	876	1
hsa-miR-504-3p	chr3_114069120_114070725_-	150	-23.72	150	-23.72	21	1605	429	1
hsa-miR-504-3p	chr1_236969443_236979843_+	165	-26.81	165	-26.81	21	572	418	1
hsa-miR-505-5p	chr9_35546426_35548532_+	150	-25.73	150	-25.73	22	2106	1680	1
hsa-miR-505-5p	chr2_148653869_148657467_+	151	-20.26	151	-20.26	22	473	136	1
hsa-miR-505-3p	chr8_17601112_17613470_-	170	-20.99	170	-20.99	22	2441	1981	1
hsa-miR-506-3p	chr4_73956383_73958017_-	161	-26.11	161	-26.11	21	1634	1103	1
hsa-miR-508-5p	chr7_97820039_97823884_+	313	-45.51	157	-24.5	23	3109	588 1985	2
hsa-miR-508-5p	chr1_243708811_244006584_-	157	-23.18	157	-23.18	23	1363	1315	1
hsa-miR-508-5p	chr17_67124759_67130883_-	151	-20.06	151	-20.06	23	659	588	1
hsa-miR-508-3p	chr11_92085261_92088570_+	167	-23.07	167	-23.07	23	3309	1023	1
hsa-miR-508-3p	chr4_62800557_62910267_+	150	-21.92	150	-21.92	23	1702	557	1
hsa-miR-509-5p	chr4_62800557_62910267_+	154	-22.44	154	-22.44	21	1702	1070	1
hsa-miR-509-5p	chr3_3197902_3215945_-	161	-22.54	161	-22.54	21	576	398	1
hsa-miR-509-5p	chr19_4511522_4511918_-	164	-22.01	164	-22.01	21	396	133	1
hsa-miR-510-5p	chr3_183361267_183369064_+	161	-25.18	161	-25.18	22	1044	945	1
hsa-miR-514a-5p	chr2_200233327_200298237_-	158	-21.97	158	-21.97	23	531	408	1
hsa-miR-532-3p	chr13_76195898_76335174_+	163	-29.43	163	-29.43	22	652	218	1
hsa-miR-532-3p	chr9_35546426_35548532_+	152	-25.36	152	-25.36	22	2106	188	1
hsa-miR-532-3p	chr7_24663284_24690331_+	150	-20.24	150	-20.24	22	653	497	1
hsa-miR-532-3p	chr1_243708811_244006584_-	150	-22.28	150	-22.28	22	1363	1120	1
hsa-miR-455-3p	chr16_31102095_31102663_-	154	-22.5	154	-22.5	21	501	402	1
hsa-miR-539-3p	chr1_243708811_244006584_-	166	-20.87	166	-20.87	22	1363	1106	1
hsa-miR-544a	chr7_23650789_23651172_+	155	-22.29	155	-22.29	22	383	19	1
hsa-miR-545-3p	chr3_112968568_112969680_+	157	-21.31	157	-21.31	22	457	150	1
hsa-miR-487b-3p	chr9_35546426_35548532_+	153	-21.46	153	-21.46	22	2106	430	1
hsa-miR-551a	chr7_97820039_97823884_+	152	-24.59	152	-24.59	21	3109	355	1
hsa-miR-92b-3p	chr11_72695132_72700142_-	150	-24.38	150	-24.38	22	318	193	1
hsa-miR-92b-3p	chr14_31596990_31602881_-	154	-22.36	154	-22.36	22	1403	836	1
hsa-miR-556-5p	chr7_33388679_33427756_+	154	-23.7	154	-23.7	22	786	502	1
hsa-miR-556-3p	chr13_61013821_61041513_+	150	-21.35	150	-21.35	22	454	250	1
hsa-miR-557	chr8_141810557_141900868_-	150	-20.1	150	-20.1	23	1125	910	1
hsa-miR-564	chr9_35546426_35548532_+	153	-22.92	153	-22.92	19	2106	1197	1
hsa-miR-564	chr18_77170402_77171501_+	165	-28.09	165	-28.09	19	1099	64	1
hsa-miR-567	chr6_131247744_131277639_-	161	-26.49	161	-26.49	23	824	706	1
hsa-miR-570-3p	chr4_62800557_62910267_+	155	-20.46	155	-20.46	22	1702	901	1
hsa-miR-572	chr13_76195898_76335174_+	155	-24.25	155	-24.25	20	652	202	1
hsa-miR-573	chr2_148653869_148657467_+	161	-20.4	161	-20.4	24	473	302	1
hsa-miR-574-5p	chr11_92085261_92088570_+	153	-21.11	153	-21.11	23	3309	486	1
hsa-miR-577	chr4_186168447_186188309_+	155	-20.08	155	-20.08	21	662	388	1
hsa-miR-578	chr9_35546426_35548532_+	151	-21.39	151	-21.39	21	2106	1450	1
hsa-miR-578	chr7_65705311_65706257_+	159	-20.93	159	-20.93	21	946	227	1
hsa-miR-578	chr7_65705311_65751696_+	159	-20.93	159	-20.93	21	1145	227	1
hsa-miR-578	chr12_95602618_95605043_-	159	-20.41	159	-20.41	21	2425	2250	1
hsa-miR-580-5p	chr3_18419661_18462483_-	152	-20.46	152	-20.46	22	1599	17	1
hsa-miR-581	chr7_65705311_65706257_+	153	-23.37	153	-23.37	21	946	225	1
hsa-miR-581	chr7_65705311_65751696_+	153	-23.37	153	-23.37	21	1145	225	1
hsa-miR-584-5p	chr7_104702610_104707254_+	150	-21.62	150	-21.62	22	426	102	1
hsa-miR-584-5p	chr7_104702610_104722244_+	150	-21.62	150	-21.62	22	1287	102	1
hsa-miR-586	chr21_38792600_38802702_+	155	-24.66	155	-24.66	22	86	60	1
hsa-miR-548b-3p	chr8_17601112_17613470_-	150	-20.6	150	-20.6	22	2441	901	1
hsa-miR-548b-3p	chr4_87614739_87622954_+	155	-21.26	155	-21.26	22	649	606	1
hsa-miR-588	chr12_129299319_129299615_-	152	-22.51	152	-22.51	21	296	168	1
hsa-miR-588	chr9_35546426_35548532_+	158	-21.06	158	-21.06	21	2106	1250	1
hsa-miR-589-5p	chr4_73956383_73958017_-	172	-29.16	172	-29.16	22	1634	525	1
hsa-miR-589-5p	chr4_62800557_62910267_+	159	-24.24	159	-24.24	22	1702	1551	1
hsa-miR-550a-5p	chr12_95602618_95605043_-	153	-24.78	153	-24.78	23	2425	2169	1
hsa-miR-550a-5p	chr3_114069120_114070725_-	158	-30.84	158	-30.84	23	1605	436	1
hsa-miR-550a-5p	chr14_31596990_31602881_-	159	-21	159	-21	23	1403	468	1
hsa-miR-593-5p	chr13_76195898_76335174_+	155	-28.29	155	-28.29	25	652	7	1
hsa-miR-593-5p	chr10_126631025_126631876_+	157	-27.96	157	-27.96	25	851	727	1
hsa-miR-593-5p	chr7_30590251_30601744_-	166	-37.91	166	-37.91	25	308	170	1
hsa-miR-593-5p	chr4_73956383_73958017_-	154	-23.13	154	-23.13	25	1634	489	1
hsa-miR-593-5p	chr7_99621041_99621930_+	153	-24.06	153	-24.06	25	668	543	1
hsa-miR-593-5p	chr8_17601112_17613470_-	162	-23.21	162	-23.21	25	2441	1193	1
hsa-miR-593-3p	chr4_41015599_41016415_-	152	-27.09	152	-27.09	19	816	485	1
hsa-miR-593-3p	chr18_77170402_77171501_+	151	-20.89	151	-20.89	19	1099	358	1
hsa-miR-593-3p	chr4_186168447_186188309_+	165	-30.78	165	-30.78	19	662	127	1
hsa-miR-593-3p	chr4_73956383_73958017_-	151	-20.13	151	-20.13	19	1634	1596	1
hsa-miR-593-3p	chr7_97820039_97823884_+	156	-21.2	156	-21.2	19	3109	293	1
hsa-miR-593-3p	chr14_31596990_31602881_-	151	-20.85	151	-20.85	19	1403	195	1
hsa-miR-596	chr3_114069120_114070725_-	154	-22.75	154	-22.75	21	1605	1018	1
hsa-miR-597-5p	chr9_4286037_4286523_-	150	-21.79	150	-21.79	22	486	43	1
hsa-miR-597-5p	chr14_31596990_31602881_-	150	-23.67	150	-23.67	22	1403	1354	1
hsa-miR-597-3p	chr21_36206706_36231875_-	155	-21.42	155	-21.42	23	297	81	1
hsa-miR-597-3p	chr4_186168447_186188309_+	161	-29.64	161	-29.64	23	662	559	1
hsa-miR-597-3p	chr11_89165951_89185063_-	153	-21.67	153	-21.67	23	395	106	1
hsa-miR-597-3p	chr1_236969443_236979843_+	155	-20.61	155	-20.61	23	572	546	1
hsa-miR-597-3p	chr5_131013395_131044965_-	151	-24.42	151	-24.42	23	813	515	1
hsa-miR-597-3p	chr14_31596990_31602881_-	151	-25.36	151	-25.36	23	1403	315	1
hsa-miR-597-3p	chr11_89155069_89185063_-	153	-21.67	153	-21.67	23	476	106	1
hsa-miR-597-3p	chr5_102432244_102433485_-	151	-22.22	151	-22.22	23	655	619	1
hsa-miR-598-5p	chr7_65705311_65706257_+	151	-21.76	151	-21.76	23	946	177	1
hsa-miR-598-5p	chr7_65705311_65751696_+	151	-21.76	151	-21.76	23	1145	177	1
hsa-miR-598-5p	chr12_12022357_12022903_+	150	-21.35	150	-21.35	23	546	85	1
hsa-miR-598-3p	chr9_98740342_98766983_+	161	-24.72	161	-24.72	22	337	75	1
hsa-miR-601	chr18_77170402_77171501_+	151	-29.27	151	-29.27	22	1099	830	1
hsa-miR-601	chr10_34558584_34573173_-	152	-21.41	152	-21.41	22	354	249	1
hsa-miR-605-5p	chr3_133907680_133914026_-	161	-23.02	161	-23.02	23	323	245	1
hsa-miR-608	chr17_2297336_2298748_-	452	-84.92	151	-35.59	25	734	217 477 338	3
hsa-miR-608	chr9_35546426_35548532_+	151	-24.28	151	-24.28	25	2106	1918	1
hsa-miR-608	chr4_73956383_73958017_-	155	-22.03	155	-22.03	25	1634	1194	1
hsa-miR-608	chr5_176963358_176966148_-	311	-54.22	157	-27.11	25	866	613 815	2
hsa-miR-608	chr3_114069120_114070725_-	166	-35.03	166	-35.03	25	1605	693	1
hsa-miR-608	chr3_133907680_133914026_-	160	-36.64	160	-36.64	25	323	23	1
hsa-miR-611	chr18_77170402_77171501_+	162	-30.21	162	-30.21	23	1099	208	1
hsa-miR-611	chr5_176963358_176966148_-	155	-20.75	155	-20.75	23	866	285	1
hsa-miR-611	chr7_99621041_99621930_+	160	-27.53	160	-27.53	23	668	565	1
hsa-miR-612	chr11_92085261_92088570_+	150	-24.87	150	-24.87	25	3309	528	1
hsa-miR-612	chr3_18419661_18462483_-	153	-26.14	153	-26.14	25	1599	378	1
hsa-miR-612	chr17_2297336_2298748_-	169	-38.03	169	-38.03	25	734	321	1
hsa-miR-612	chr17_80521229_80526077_+	150	-31.62	150	-31.62	25	343	35	1
hsa-miR-612	chr9_35546426_35548532_+	158	-27.29	158	-27.29	25	2106	1192	1
hsa-miR-612	chr4_186168447_186188309_+	152	-22.43	152	-22.43	25	662	515	1
hsa-miR-612	chr12_12022357_12022903_+	160	-26	160	-26	25	546	255	1
hsa-miR-612	chr5_176963358_176966148_-	155	-27.16	155	-27.16	25	866	634	1
hsa-miR-612	chr7_97820039_97823884_+	480	-84.03	170	-30.71	25	3109	919 2426 2723	3
hsa-miR-614	chr1_243708811_244006584_-	151	-24.69	151	-24.69	23	1363	1045	1
hsa-miR-615-5p	chr9_4286037_4286523_-	154	-34.36	154	-34.36	22	486	188	1
hsa-miR-615-5p	chr4_41015599_41016415_-	151	-24.92	151	-24.92	22	816	316	1
hsa-miR-615-5p	chr9_35546426_35548532_+	306	-63.01	156	-34.93	22	2106	1779 1948	2
hsa-miR-615-5p	chr18_77170402_77171501_+	160	-23.69	160	-23.69	22	1099	504	1
hsa-miR-615-5p	chr12_12022357_12022903_+	155	-27.92	155	-27.92	22	546	2	1
hsa-miR-615-5p	chr2_24357988_24369956_+	156	-26.63	156	-26.63	22	587	310	1
hsa-miR-615-3p	chr16_53175090_53191453_+	157	-23.93	157	-23.93	22	1616	1527	1
hsa-miR-615-3p	chr3_112968568_112969680_+	150	-23.39	150	-23.39	22	457	295	1
hsa-miR-616-3p	chr5_65349233_65350779_+	152	-22.08	152	-22.08	22	1546	1252	1
hsa-miR-617	chr7_90355880_90419967_+	150	-20.25	150	-20.25	22	421	336	1
hsa-miR-617	chr8_17601112_17613470_-	155	-22.63	155	-22.63	22	2441	1033	1
hsa-miR-618	chr1_58971731_59004982_-	165	-26.49	165	-26.49	23	1381	182	1
hsa-miR-619-5p	chr10_126631025_126631876_+	151	-20.92	151	-20.92	22	851	541	1
hsa-miR-619-5p	chr6_118832460_118887479_-	154	-23	154	-23	22	1025	70	1
hsa-miR-619-3p	chr9_4286037_4286523_-	154	-24.34	154	-24.34	24	486	375	1
hsa-miR-619-3p	chr7_99621041_99621930_+	159	-21.15	159	-21.15	24	668	407	1
hsa-miR-622	chr5_176963358_176966148_-	150	-25.7	150	-25.7	21	866	15	1
hsa-miR-622	chr3_114069120_114070725_-	158	-28.45	158	-28.45	21	1605	1019	1
hsa-miR-622	chr1_243776972_244006584_-	153	-23.93	153	-23.93	21	808	415	1
hsa-miR-622	chr14_31596990_31602881_-	150	-24.13	150	-24.13	21	1403	950	1
hsa-miR-622	chr1_243708811_244006584_-	153	-23.93	153	-23.93	21	1363	415	1
hsa-miR-622	chr3_112968568_112969680_+	158	-30.43	158	-30.43	21	457	145	1
hsa-miR-623	chr7_24663284_24690331_+	153	-25.31	153	-25.31	23	653	64	1
hsa-miR-625-5p	chr17_60061531_60062451_-	159	-25.34	159	-25.34	21	503	143	1
hsa-miR-625-5p	chr9_14120438_14179779_-	169	-26.94	169	-26.94	21	683	441	1
hsa-miR-627-3p	chr8_17601112_17613470_-	151	-20.3	151	-20.3	20	2441	1287	1
hsa-miR-628-3p	chr7_65705311_65706257_+	157	-20.78	157	-20.78	21	946	513	1
hsa-miR-628-3p	chr7_65705311_65751696_+	157	-20.78	157	-20.78	21	1145	513	1
hsa-miR-629-3p	chr1_243776972_244006584_-	151	-24.72	151	-24.72	22	808	141	1
hsa-miR-629-3p	chr1_243708811_244006584_-	151	-24.72	151	-24.72	22	1363	141	1
hsa-miR-33b-5p	chr8_141810557_141900868_-	160	-22.74	160	-22.74	20	1125	576	1
hsa-miR-33b-5p	chr12_95602618_95605043_-	150	-21.14	150	-21.14	20	2425	1148	1
hsa-miR-33b-5p	chr14_31596990_31602881_-	155	-22.35	155	-22.35	20	1403	1267	1
hsa-miR-33b-5p	chr3_3197902_3215945_-	155	-22.74	155	-22.74	20	576	191	1
hsa-miR-33b-3p	chr16_31102095_31102663_-	152	-27.67	152	-27.67	22	501	185	1
hsa-miR-634	chr19_17212469_17213367_+	161	-21.8	161	-21.8	22	898	235	1
hsa-miR-634	chr9_35546426_35548532_+	164	-25.25	164	-25.25	22	2106	917	1
hsa-miR-634	chr14_31596990_31602881_-	157	-20.43	157	-20.43	22	1403	353	1
hsa-miR-635	chr10_34558584_34573173_-	155	-20.06	155	-20.06	23	354	293	1
hsa-miR-636	chr19_17212469_17213367_+	151	-30.55	151	-30.55	23	898	332	1
hsa-miR-637	chr19_17212469_17213367_+	150	-24.79	150	-24.79	24	898	339	1
hsa-miR-637	chr9_35546426_35548532_+	157	-30.45	157	-30.45	24	2106	362	1
hsa-miR-637	chr14_105412025_105412520_-	174	-29.99	174	-29.99	24	495	446	1
hsa-miR-637	chr12_12022357_12022903_+	160	-29.37	160	-29.37	24	546	2	1
hsa-miR-637	chr14_89041036_89044484_+	151	-25.1	151	-25.1	24	418	334	1
hsa-miR-637	chr4_73956383_73958017_-	156	-29.1	156	-29.1	24	1634	1151	1
hsa-miR-637	chr7_97820039_97823884_+	150	-24.53	150	-24.53	24	3109	2547	1
hsa-miR-638	chr12_129299319_129299615_-	165	-31.32	165	-31.32	25	296	116	1
hsa-miR-638	chr4_48371865_48396670_+	150	-27.94	150	-27.94	25	971	686	1
hsa-miR-639	chr9_35546426_35548532_+	150	-29.06	150	-29.06	23	2106	1585	1
hsa-miR-639	chr14_31596990_31602881_-	161	-24.93	161	-24.93	23	1403	588	1
hsa-miR-640	chr6_118832460_118887479_-	166	-25.86	166	-25.86	21	1025	781	1
hsa-miR-642a-5p	chr14_105412025_105412520_-	150	-30.63	150	-30.63	22	495	96	1
hsa-miR-642a-5p	chr1_236969443_236979843_+	158	-24.96	158	-24.96	22	572	518	1
hsa-miR-642a-3p	chr4_106155053_106158508_+	154	-23.4	154	-23.4	22	3455	3432	1
hsa-miR-644a	chr5_131013395_131044965_-	153	-24.77	153	-24.77	19	813	365	1
hsa-miR-645	chr7_104702610_104722244_+	157	-21.69	157	-21.69	19	1287	409	1
hsa-miR-646	chr9_35546426_35548532_+	154	-21.89	154	-21.89	19	2106	1485	1
hsa-miR-646	chr8_141810557_141900868_-	155	-21.25	155	-21.25	19	1125	27	1
hsa-miR-647	chrX_147743428_147744289_+	156	-21.23	156	-21.23	21	861	795	1
hsa-miR-647	chr9_35546426_35548532_+	151	-22.89	151	-22.89	21	2106	1659	1
hsa-miR-647	chr5_176963358_176966148_-	156	-24.72	156	-24.72	21	866	763	1
hsa-miR-647	chr1_243708811_244006584_-	150	-24.26	150	-24.26	21	1363	996	1
hsa-miR-647	chr4_48371865_48396670_+	151	-20.28	151	-20.28	21	971	478	1
hsa-miR-648	chr18_77170402_77171501_+	161	-24.79	161	-24.79	19	1099	545	1
hsa-miR-650	chr9_37424841_37426651_+	152	-23.86	152	-23.86	21	321	73	1
hsa-miR-650	chr12_129299319_129299615_-	151	-23.86	151	-23.86	21	296	206	1
hsa-miR-650	chr9_35546426_35548532_+	151	-23.44	151	-23.44	21	2106	1968	1
hsa-miR-650	chr4_106155053_106158508_+	152	-23.11	152	-23.11	21	3455	884	1
hsa-miR-650	chr12_95602618_95605043_-	159	-21.18	159	-21.18	21	2425	1510	1
hsa-miR-650	chr7_97820039_97823884_+	155	-23.24	155	-23.24	21	3109	2189	1
hsa-miR-650	chr7_104702610_104722244_+	150	-21.31	150	-21.31	21	1287	960	1
hsa-miR-652-3p	chr11_92085261_92088570_+	151	-22.21	151	-22.21	21	3309	2973	1
hsa-miR-661	chr2_200233327_200298237_-	165	-25.89	165	-25.89	24	531	150	1
hsa-miR-661	chr9_4286037_4286523_-	159	-32.75	159	-32.75	24	486	382	1
hsa-miR-661	chr3_18419661_18462483_-	153	-20.38	153	-20.38	24	1599	385	1
hsa-miR-661	chr9_35546426_35548532_+	172	-31.69	172	-31.69	24	2106	1385	1
hsa-miR-661	chr14_105412025_105412520_-	152	-29	152	-29	24	495	323	1
hsa-miR-661	chr12_12022357_12022903_+	330	-62.47	174	-32.64	24	546	182 2	2
hsa-miR-661	chr3_114069120_114070725_-	151	-36.66	151	-36.66	24	1605	1394	1
hsa-miR-662	chr3_114069120_114070725_-	155	-21.16	155	-21.16	21	1605	373	1
hsa-miR-662	chr4_62800557_62910267_+	153	-22.31	153	-22.31	21	1702	718	1
hsa-miR-663a	chr13_76195898_76335174_+	157	-36.52	157	-36.52	22	652	235	1
hsa-miR-663a	chr9_4286037_4286523_-	152	-30.32	152	-30.32	22	486	203	1
hsa-miR-663a	chr17_2297336_2298748_-	157	-30.18	157	-30.18	22	734	127	1
hsa-miR-663a	chr18_77170402_77171501_+	316	-58.01	159	-30.59	22	1099	936 17	2
hsa-miR-663a	chr12_12022357_12022903_+	162	-33.15	162	-33.15	22	546	492	1
hsa-miR-663a	chr4_73956383_73958017_-	150	-28.14	150	-28.14	22	1634	498	1
hsa-miR-663a	chr7_99621041_99621930_+	153	-29.43	153	-29.43	22	668	634	1
hsa-miR-449b-5p	chr19_17212469_17213367_+	151	-20.99	151	-20.99	22	898	803	1
hsa-miR-449b-3p	chr11_89165951_89185063_-	156	-24.89	156	-24.89	22	395	189	1
hsa-miR-449b-3p	chr11_89155069_89185063_-	156	-24.89	156	-24.89	22	476	189	1
hsa-miR-653-3p	chr17_2297336_2298748_-	166	-20.54	166	-20.54	22	734	539	1
hsa-miR-653-3p	chr9_35546426_35548532_+	324	-47.26	162	-24.04	22	2106	604 1958	2
hsa-miR-653-3p	chr19_13039155_13039661_-	154	-20.41	154	-20.41	22	338	76	1
hsa-miR-653-3p	chr14_31596990_31602881_-	153	-21.05	153	-21.05	22	1403	956	1
hsa-miR-654-5p	chr5_176963358_176966148_-	157	-27.15	157	-27.15	22	866	610	1
hsa-miR-654-3p	chr7_30590251_30601744_-	157	-27.7	157	-27.7	22	308	115	1
hsa-miR-654-3p	chr3_114069120_114070725_-	153	-24.17	153	-24.17	22	1605	1051	1
hsa-miR-656-5p	chr4_48371865_48396670_+	151	-30.8	151	-30.8	21	971	938	1
hsa-miR-657	chr12_95602618_95605043_-	150	-27.35	150	-27.35	23	2425	2253	1
hsa-miR-657	chr16_53288349_53308214_+	157	-22.86	157	-22.86	23	1106	625	1
hsa-miR-657	chr6_144858717_144864006_+	159	-22.32	159	-22.32	23	362	104	1
hsa-miR-658	chr16_53175090_53191453_+	151	-27.78	151	-27.78	25	1616	1011	1
hsa-miR-659-5p	chr16_31102095_31102663_-	164	-22.38	164	-22.38	22	501	157	1
hsa-miR-659-3p	chr21_36206706_36231875_-	155	-27.61	155	-27.61	22	297	237	1
hsa-miR-659-3p	chr4_73956383_73958017_-	158	-28.08	158	-28.08	22	1634	1007	1
hsa-miR-659-3p	chr1_114372213_114377061_-	156	-21.73	156	-21.73	22	356	75	1
hsa-miR-660-5p	chr7_33388679_33427756_+	161	-20.02	161	-20.02	22	786	386	1
hsa-miR-660-3p	chr4_73956383_73958017_-	150	-20.5	150	-20.5	21	1634	814	1
hsa-miR-421	chr10_126631025_126631876_+	160	-20.04	160	-20.04	23	851	418	1
hsa-miR-758-5p	chr3_18419661_18462483_-	151	-23.38	151	-23.38	22	1599	960	1
hsa-miR-758-3p	chr8_141810557_141900868_-	167	-24.84	167	-24.84	22	1125	241	1
hsa-miR-1264	chr2_200233327_200298237_-	162	-21.77	162	-21.77	23	531	300	1
hsa-miR-1264	chr3_18419661_18462483_-	158	-21.53	158	-21.53	23	1599	535	1
hsa-miR-671-5p	chr11_92085261_92088570_+	158	-29.23	158	-29.23	23	3309	122	1
hsa-miR-671-5p	chrX_147743428_147744289_+	160	-28.88	160	-28.88	23	861	566	1
hsa-miR-671-5p	chr7_104702610_104707254_+	162	-30.09	162	-30.09	23	426	141	1
hsa-miR-671-5p	chr7_104702610_104722244_+	162	-30.09	162	-30.09	23	1287	141	1
hsa-miR-671-3p	chr12_95602618_95605043_-	163	-26.48	163	-26.48	21	2425	988	1
hsa-miR-550a-3-5p	chr3_114069120_114070725_-	158	-24.12	158	-24.12	20	1605	439	1
hsa-miR-550a-3-5p	chr14_31596990_31602881_-	159	-20.95	159	-20.95	20	1403	471	1
hsa-miR-767-5p	chr7_104702610_104707254_+	160	-22.39	160	-22.39	23	426	110	1
hsa-miR-767-5p	chr7_99621041_99621930_+	152	-20.91	152	-20.91	23	668	541	1
hsa-miR-767-5p	chr7_104702610_104722244_+	160	-22.39	160	-22.39	23	1287	110	1
hsa-miR-767-5p	chr1_243708811_244006584_-	156	-21.5	156	-21.5	23	1363	849	1
hsa-miR-767-3p	chr11_92085261_92088570_+	162	-22.93	162	-22.93	23	3309	741	1
hsa-miR-1224-5p	chr3_18419661_18462483_-	159	-25.33	159	-25.33	19	1599	952	1
hsa-miR-1224-5p	chr10_126631025_126631876_+	169	-25.21	169	-25.21	19	851	389	1
hsa-miR-1224-5p	chr9_35546426_35548532_+	151	-30.45	151	-30.45	19	2106	1795	1
hsa-miR-1224-5p	chr4_73956383_73958017_-	156	-25.39	156	-25.39	19	1634	1265	1
hsa-miR-1224-5p	chr1_185183638_185200840_+	152	-25.32	152	-25.32	19	469	245	1
hsa-miR-1224-5p	chr14_31596990_31602881_-	153	-21.77	153	-21.77	19	1403	1022	1
hsa-miR-1224-5p	chr3_112968568_112969680_+	150	-20.92	150	-20.92	19	457	319	1
hsa-miR-1224-5p	chr4_48371865_48396670_+	155	-23.6	155	-23.6	19	971	338	1
hsa-miR-320b	chr11_92085261_92088570_+	157	-20.07	157	-20.07	22	3309	2806	1
hsa-miR-320b	chr4_106155053_106158508_+	159	-20.94	159	-20.94	22	3455	3268	1
hsa-miR-320b	chr12_95602618_95605043_-	171	-23.19	171	-23.19	22	2425	660	1
hsa-miR-320b	chr8_17601112_17613470_-	158	-25.51	158	-25.51	22	2441	1201	1
hsa-miR-320c	chr12_95602618_95605043_-	166	-22.92	166	-22.92	20	2425	662	1
hsa-miR-1296-5p	chr9_35546426_35548532_+	151	-25.05	151	-25.05	22	2106	1657	1
hsa-miR-1296-5p	chr5_131013395_131044965_-	167	-26.68	167	-26.68	22	813	234	1
hsa-miR-1296-3p	chr9_35546426_35548532_+	303	-48.96	153	-27.12	22	2106	1830 1950	2
hsa-miR-1271-3p	chrX_147743428_147744289_+	154	-21.61	154	-21.61	22	861	695	1
hsa-miR-1271-3p	chr1_58971731_59004982_-	152	-22.79	152	-22.79	22	1381	522	1
hsa-miR-1301-5p	chr7_99621041_99621930_+	155	-21.06	155	-21.06	19	668	379	1
hsa-miR-1301-3p	chr6_118832460_118887479_-	156	-28.43	156	-28.43	24	1025	659	1
hsa-miR-1301-3p	chr4_41015599_41016415_-	158	-24.19	158	-24.19	24	816	217	1
hsa-miR-1301-3p	chr9_35546426_35548532_+	154	-34.02	154	-34.02	24	2106	859	1
hsa-miR-1301-3p	chr18_77170402_77171501_+	164	-30.47	164	-30.47	24	1099	401	1
hsa-miR-1301-3p	chr4_186168447_186188309_+	170	-25.43	170	-25.43	24	662	181	1
hsa-miR-1301-3p	chr12_12022357_12022903_+	152	-25.5	152	-25.5	24	546	406	1
hsa-miR-1301-3p	chr4_106155053_106158508_+	161	-25.18	161	-25.18	24	3455	892	1
hsa-miR-1301-3p	chr12_95602618_95605043_-	153	-27.3	153	-27.3	24	2425	2373	1
hsa-miR-1301-3p	chr7_97820039_97823884_+	151	-30.41	151	-30.41	24	3109	2433	1
hsa-miR-1185-2-3p	chr4_62800557_62910267_+	158	-20.84	158	-20.84	22	1702	315	1
hsa-miR-449c-5p	chr4_106155053_106158508_+	153	-22.14	153	-22.14	25	3455	146	1
hsa-miR-449c-5p	chr9_87317073_87325706_+	157	-22.46	157	-22.46	25	371	293	1
hsa-miR-769-5p	chr9_14120438_14179779_-	163	-25.43	163	-25.43	22	683	205	1
hsa-miR-769-3p	chr4_103225473_103236987_-	154	-24.91	154	-24.91	23	621	326	1
hsa-miR-766-5p	chrX_147743428_147744289_+	154	-28.62	154	-28.62	22	861	213	1
hsa-miR-766-5p	chr9_4286037_4286523_-	150	-20.12	150	-20.12	22	486	453	1
hsa-miR-766-5p	chr19_17212469_17213367_+	154	-30.01	154	-30.01	22	898	791	1
hsa-miR-766-5p	chr9_35546426_35548532_+	155	-20.91	155	-20.91	22	2106	1463	1
hsa-miR-766-5p	chr4_73956383_73958017_-	158	-22.37	158	-22.37	22	1634	1041	1
hsa-miR-766-5p	chr19_13039155_13039661_-	154	-27.15	154	-27.15	22	338	309	1
hsa-miR-766-5p	chr5_65349233_65350779_+	161	-27.7	161	-27.7	22	1546	912	1
hsa-miR-766-5p	chr1_58971731_59004982_-	152	-22.6	152	-22.6	22	1381	528	1
hsa-miR-766-5p	chr1_171537385_171544267_+	164	-21.59	164	-21.59	22	397	150	1
hsa-miR-766-5p	chr13_61013821_61041513_+	158	-20.76	158	-20.76	22	454	98	1
hsa-miR-766-3p	chr13_76195898_76335174_+	150	-22.68	150	-22.68	22	652	330	1
hsa-miR-766-3p	chr9_35546426_35548532_+	317	-44.94	166	-23.6	22	2106	574 681	2
hsa-miR-766-3p	chr14_105412025_105412520_-	155	-21.69	155	-21.69	22	495	91	1
hsa-miR-766-3p	chr17_58012553_58018304_+	155	-28.88	155	-28.88	22	357	142	1
hsa-miR-378d	chrX_147743428_147744289_+	152	-20.39	152	-20.39	20	861	17	1
hsa-miR-378d	chr11_120343758_120348235_+	155	-20.24	155	-20.24	20	577	557	1
hsa-miR-1185-1-3p	chr4_62800557_62910267_+	157	-21.04	157	-21.04	22	1702	313	1
hsa-miR-762	chr3_18419661_18462483_-	155	-33.48	155	-33.48	22	1599	885	1
hsa-miR-762	chr21_36206706_36231875_-	158	-32.55	158	-32.55	22	297	203	1
hsa-miR-762	chr7_90355880_90419967_+	154	-34.54	154	-34.54	22	421	223	1
hsa-miR-762	chr17_2297336_2298748_-	151	-37.74	151	-37.74	22	734	244	1
hsa-miR-762	chr4_41015599_41016415_-	156	-26.96	156	-26.96	22	816	615	1
hsa-miR-762	chr17_80521229_80526077_+	151	-32.76	151	-32.76	22	343	205	1
hsa-miR-762	chr9_35546426_35548532_+	315	-61.91	159	-32.4	22	2106	1400 491	2
hsa-miR-762	chr8_22054192_22054933_+	167	-32.77	167	-32.77	22	342	29	1
hsa-miR-762	chr12_12022357_12022903_+	150	-31.12	150	-31.12	22	546	286	1
hsa-miR-762	chr5_176963358_176966148_-	152	-30.35	152	-30.35	22	866	1	1
hsa-miR-762	chr19_13039155_13039661_-	158	-31.36	158	-31.36	22	338	284	1
hsa-miR-762	chr3_114069120_114070725_-	151	-24.92	151	-24.92	22	1605	1416	1
hsa-miR-762	chr9_14120438_14179779_-	152	-30.96	152	-30.96	22	683	550	1
hsa-miR-802	chr7_65705311_65706257_+	166	-26.46	166	-26.46	23	946	469	1
hsa-miR-802	chr7_65705311_65751696_+	166	-26.46	166	-26.46	23	1145	469	1
hsa-miR-670-5p	chr11_92085261_92088570_+	151	-20.71	151	-20.71	20	3309	3249	1
hsa-miR-670-5p	chr16_31733946_31734674_+	158	-23.17	158	-23.17	20	223	2	1
hsa-miR-670-3p	chr9_35546426_35548532_+	151	-28.16	151	-28.16	21	2106	694	1
hsa-miR-1298-5p	chr11_89133184_89135710_-	151	-21.34	151	-21.34	22	445	329	1
hsa-miR-1298-5p	chr9_87317073_87325706_+	150	-20.65	150	-20.65	22	371	303	1
hsa-miR-1298-3p	chr3_112968568_112969680_+	150	-24.65	150	-24.65	21	457	391	1
hsa-miR-1298-3p	chr17_58012553_58018304_+	154	-23.42	154	-23.42	21	357	299	1
hsa-miR-2113	chr17_80521229_80526077_+	156	-21	156	-21	21	343	8	1
hsa-miR-2113	chr7_97820039_97823884_+	153	-23.59	153	-23.59	21	3109	2537	1
hsa-miR-2113	chr7_104702610_104722244_+	165	-20.03	165	-20.03	21	1287	814	1
hsa-miR-2113	chr11_89133184_89135710_-	162	-24.03	162	-24.03	21	445	143	1
hsa-miR-2113	chr4_103225473_103236987_-	171	-21.2	171	-21.2	21	621	122	1
hsa-miR-761	chr9_35546426_35548532_+	159	-20.14	159	-20.14	22	2106	1972	1
hsa-miR-761	chr5_176963358_176966148_-	154	-20.47	154	-20.47	22	866	22	1
hsa-miR-761	chr4_48371865_48396670_+	164	-25.5	164	-25.5	22	971	608	1
hsa-miR-764	chr1_227192694_227204751_-	150	-26.73	150	-26.73	22	546	1	1
hsa-miR-764	chr7_97820039_97823884_+	162	-29.65	162	-29.65	22	3109	2973	1
hsa-miR-764	chr5_65349233_65350779_+	162	-25.11	162	-25.11	22	1546	315	1
hsa-miR-765	chr18_77170402_77171501_+	161	-26.9	161	-26.9	21	1099	167	1
hsa-miR-765	chr7_104702610_104707254_+	156	-26.67	156	-26.67	21	426	150	1
hsa-miR-765	chr7_104702610_104722244_+	156	-26.67	156	-26.67	21	1287	150	1
hsa-miR-765	chr3_112968568_112969680_+	157	-23.58	157	-23.58	21	457	126	1
hsa-miR-770-5p	chrX_147743428_147744289_+	160	-23.56	160	-23.56	23	861	312	1
hsa-miR-770-5p	chr8_141810557_141900868_-	156	-20.88	156	-20.88	23	1125	86	1
hsa-miR-770-5p	chr8_17601112_17613470_-	151	-27.35	151	-27.35	23	2441	466	1
hsa-miR-675-5p	chr12_12022357_12022903_+	156	-30.38	156	-30.38	23	546	188	1
hsa-miR-298	chr12_95602618_95605043_-	153	-28.57	153	-28.57	24	2425	1391	1
hsa-miR-298	chr4_73956383_73958017_-	173	-26.16	173	-26.16	24	1634	1445	1
hsa-miR-891a-3p	chr16_31102095_31102663_-	166	-22.11	166	-22.11	22	501	347	1
hsa-miR-892a	chr19_4511522_4511918_-	169	-21.99	169	-21.99	21	396	27	1
hsa-miR-892a	chr9_14120438_14179779_-	150	-20.81	150	-20.81	21	683	477	1
hsa-miR-874-5p	chr13_76195898_76335174_+	155	-28.7	155	-28.7	23	652	243	1
hsa-miR-874-5p	chr9_35546426_35548532_+	151	-22.38	151	-22.38	23	2106	1882	1
hsa-miR-874-5p	chr5_176963358_176966148_-	152	-21.79	152	-21.79	23	866	415	1
hsa-miR-874-5p	chr14_31596990_31602881_-	153	-26.43	153	-26.43	23	1403	979	1
hsa-miR-874-5p	chr16_53288349_53308214_+	154	-27.14	154	-27.14	23	1106	644	1
hsa-miR-874-3p	chr16_53175090_53191453_+	152	-25.44	152	-25.44	22	1616	713	1
hsa-miR-890	chr4_52729602_52758017_+	156	-21.47	156	-21.47	21	481	265	1
hsa-miR-888-3p	chr5_65349233_65350779_+	152	-22.89	152	-22.89	22	1546	1365	1
hsa-miR-888-3p	chr3_114069120_114070725_-	157	-24.62	157	-24.62	22	1605	223	1
hsa-miR-888-3p	chr6_73005639_73043538_+	154	-20.72	154	-20.72	22	546	360	1
hsa-miR-888-3p	chr14_31596990_31602881_-	159	-20.34	159	-20.34	22	1403	856	1
hsa-miR-892b	chrX_147743428_147744289_+	156	-23.03	156	-23.03	22	861	798	1
hsa-miR-892b	chr9_35546426_35548532_+	164	-29.06	164	-29.06	22	2106	601	1
hsa-miR-892b	chr12_95602618_95605043_-	159	-23.35	159	-23.35	22	2425	1663	1
hsa-miR-892b	chr7_97820039_97823884_+	304	-47.3	153	-24.99	22	3109	2461 2401	2
hsa-miR-892b	chr11_89133184_89135710_-	163	-22.82	163	-22.82	22	445	275	1
hsa-miR-541-5p	chr11_92085261_92088570_+	152	-26.54	152	-26.54	25	3309	2348	1
hsa-miR-541-3p	chr17_2297336_2298748_-	150	-24.48	150	-24.48	22	734	342	1
hsa-miR-541-3p	chr17_80521229_80526077_+	159	-25.2	159	-25.2	22	343	137	1
hsa-miR-541-3p	chr5_176963358_176966148_-	156	-25.27	156	-25.27	22	866	610	1
hsa-miR-541-3p	chr7_97820039_97823884_+	151	-22.24	151	-22.24	22	3109	611	1
hsa-miR-541-3p	chr8_17601112_17613470_-	153	-20.92	153	-20.92	22	2441	71	1
hsa-miR-889-5p	chr21_36206706_36231875_-	161	-24.31	161	-24.31	22	297	179	1
hsa-miR-889-5p	chr3_114069120_114070725_-	163	-26.25	163	-26.25	22	1605	1189	1
hsa-miR-875-5p	chr3_169694733_169706147_+	156	-21.73	156	-21.73	22	585	388	1
hsa-miR-708-5p	chr4_106155053_106158508_+	167	-20.86	167	-20.86	23	3455	1115	1
hsa-miR-147b	chr3_171969049_171979873_+	155	-23.17	155	-23.17	22	282	50	1
hsa-miR-147b	chr4_106155053_106158508_+	170	-25.52	170	-25.52	22	3455	860	1
hsa-miR-744-5p	chr18_77170402_77171501_+	152	-23.86	152	-23.86	22	1099	582	1
hsa-miR-744-5p	chr4_73956383_73958017_-	151	-26.81	151	-26.81	22	1634	454	1
hsa-miR-744-5p	chr3_114069120_114070725_-	152	-26.07	152	-26.07	22	1605	616	1
hsa-miR-744-3p	chr4_106155053_106158508_+	152	-20.02	152	-20.02	22	3455	63	1
hsa-miR-744-3p	chr11_120343758_120348235_+	155	-24.67	155	-24.67	22	577	301	1
hsa-miR-885-3p	chr13_76195898_76335174_+	151	-20.37	151	-20.37	22	652	20	1
hsa-miR-885-3p	chr4_62800557_62910267_+	150	-20.6	150	-20.6	22	1702	908	1
hsa-miR-877-5p	chr8_13356557_13357705_-	152	-25.18	152	-25.18	20	1148	60	1
hsa-miR-877-5p	chr6_118832460_118887479_-	152	-21.7	152	-21.7	20	1025	486	1
hsa-miR-877-3p	chr8_22332466_22333137_+	154	-22.24	154	-22.24	21	323	93	1
hsa-miR-877-3p	chr9_35546426_35548532_+	313	-53.21	161	-28.55	21	2106	349 1116	2
hsa-miR-877-3p	chr12_95602618_95605043_-	158	-30.64	158	-30.64	21	2425	2016	1
hsa-miR-877-3p	chr14_89041036_89044484_+	164	-22.25	164	-22.25	21	418	63	1
hsa-miR-877-3p	chr6_131276244_131277639_-	152	-21.51	152	-21.51	21	719	521	1
hsa-miR-877-3p	chr6_131247744_131277639_-	152	-21.51	152	-21.51	21	824	521	1
hsa-miR-877-3p	chr1_243776972_244006584_-	305	-47.66	154	-24.53	21	808	436 138	2
hsa-miR-877-3p	chr1_243708811_244006584_-	305	-47.66	154	-24.53	21	1363	436 138	2
hsa-miR-877-3p	chr1_154207066_154207767_+	150	-20.12	150	-20.12	21	298	262	1
hsa-miR-887-5p	chr4_106155053_106158508_+	161	-28.42	161	-28.42	21	3455	1877	1
hsa-miR-665	chr11_92085261_92088570_+	152	-24.69	152	-24.69	20	3309	63	1
hsa-miR-665	chr7_97820039_97823884_+	312	-51.98	160	-27.38	20	3109	1922 1644	2
hsa-miR-665	chr4_62800557_62910267_+	158	-25.42	158	-25.42	20	1702	1565	1
hsa-miR-873-3p	chr9_37424841_37426651_+	165	-31.59	165	-31.59	22	321	247	1
hsa-miR-873-3p	chr5_65349233_65350779_+	162	-25.32	162	-25.32	22	1546	390	1
hsa-miR-873-3p	chr4_62800557_62910267_+	156	-21.57	156	-21.57	22	1702	831	1
hsa-miR-760	chr21_36206706_36231875_-	314	-54.56	160	-27.86	20	297	49 270	2
hsa-miR-760	chr9_35546426_35548532_+	150	-25.12	150	-25.12	20	2106	2026	1
hsa-miR-760	chr7_97820039_97823884_+	158	-23.79	158	-23.79	20	3109	227	1
hsa-miR-760	chr22_32874967_32875262_+	158	-31.33	158	-31.33	20	295	144	1
hsa-miR-760	chr4_62800557_62910267_+	165	-38.39	165	-38.39	20	1702	1589	1
hsa-miR-760	chr10_34558584_34573173_-	158	-27.66	158	-27.66	20	354	255	1
hsa-miR-301b-5p	chr11_92085261_92088570_+	154	-20.11	154	-20.11	22	3309	398	1
hsa-miR-301b-5p	chr5_176963358_176966148_-	150	-20.84	150	-20.84	22	866	696	1
hsa-miR-301b-5p	chr11_120343758_120348235_+	151	-21.19	151	-21.19	22	577	34	1
hsa-miR-301b-5p	chr6_73005639_73043538_+	150	-20.57	150	-20.57	22	546	258	1
hsa-miR-301b-5p	chr17_60061531_60062451_-	158	-24.46	158	-24.46	22	503	419	1
hsa-miR-208b-5p	chr11_92085261_92088570_+	155	-20.98	155	-20.98	22	3309	2990	1
hsa-miR-920	chr17_2297336_2298748_-	153	-31.2	153	-31.2	20	734	124	1
hsa-miR-920	chr4_41015599_41016415_-	160	-25.31	160	-25.31	20	816	785	1
hsa-miR-920	chr16_31102095_31102663_-	155	-23.18	155	-23.18	20	501	31	1
hsa-miR-920	chr4_106155053_106158508_+	150	-22.93	150	-22.93	20	3455	1284	1
hsa-miR-920	chr5_176963358_176966148_-	150	-20.84	150	-20.84	20	866	703	1
hsa-miR-922	chr14_31596990_31602881_-	166	-22.27	166	-22.27	23	1403	698	1
hsa-miR-924	chr12_122825299_122826244_-	162	-21.93	162	-21.93	20	945	524	1
hsa-miR-509-3-5p	chr4_62800557_62910267_+	152	-21.61	152	-21.61	22	1702	1074	1
hsa-miR-509-3-5p	chr3_3197902_3215945_-	166	-26.25	166	-26.25	22	576	396	1
hsa-miR-509-3-5p	chr19_4511522_4511918_-	158	-22.49	158	-22.49	22	396	131	1
hsa-miR-934	chr4_73956383_73958017_-	150	-22.81	150	-22.81	22	1634	912	1
hsa-miR-934	chr7_97820039_97823884_+	150	-20.61	150	-20.61	22	3109	2111	1
hsa-miR-934	chr6_73005639_73043538_+	155	-25.39	155	-25.39	22	546	501	1
hsa-miR-936	chr4_73956383_73958017_-	156	-25.87	156	-25.87	22	1634	1113	1
hsa-miR-936	chr7_24663284_24690331_+	156	-20.6	156	-20.6	22	653	28	1
hsa-miR-936	chr14_31596990_31602881_-	152	-21.23	152	-21.23	22	1403	699	1
hsa-miR-937-5p	chr7_30590251_30601744_-	155	-24.78	155	-24.78	20	308	218	1
hsa-miR-937-3p	chr4_87614739_87622954_+	151	-21.09	151	-21.09	22	649	431	1
hsa-miR-939-5p	chr17_2297336_2298748_-	305	-54.06	153	-28.11	24	734	121 353	2
hsa-miR-939-5p	chr4_41015599_41016415_-	161	-33.68	161	-33.68	24	816	779	1
hsa-miR-939-5p	chr9_35546426_35548532_+	313	-67.34	160	-35.18	24	2106	1681 2032	2
hsa-miR-939-5p	chr18_77170402_77171501_+	156	-34.78	156	-34.78	24	1099	28	1
hsa-miR-939-5p	chr7_104702610_104707254_+	150	-32.96	150	-32.96	24	426	139	1
hsa-miR-939-5p	chr5_176963358_176966148_-	343	-69.49	172	-37.22	24	866	582 509	2
hsa-miR-939-5p	chr7_97820039_97823884_+	150	-34.27	150	-34.27	24	3109	2906	1
hsa-miR-939-5p	chr3_114069120_114070725_-	155	-33.39	155	-33.39	24	1605	924	1
hsa-miR-939-5p	chr7_104702610_104722244_+	150	-32.96	150	-32.96	24	1287	139	1
hsa-miR-939-5p	chr3_100565215_100581229_-	152	-27.88	152	-27.88	24	513	275	1
hsa-miR-939-5p	chr3_100565215_100570784_-	152	-27.88	152	-27.88	24	438	200	1
hsa-miR-939-3p	chr11_92085261_92088570_+	152	-20.68	152	-20.68	21	3309	534	1
hsa-miR-939-3p	chr17_2297336_2298748_-	153	-30.02	153	-30.02	21	734	559	1
hsa-miR-940	chr17_2297336_2298748_-	154	-25.48	154	-25.48	21	734	105	1
hsa-miR-940	chr19_17212469_17213367_+	150	-28.61	150	-28.61	21	898	464	1
hsa-miR-941	chr18_77170402_77171501_+	156	-26.08	156	-26.08	23	1099	548	1
hsa-miR-942-5p	chr13_76195898_76335174_+	165	-23.79	165	-23.79	22	652	399	1
hsa-miR-942-5p	chr2_200233327_200298237_-	157	-20.11	157	-20.11	22	531	49	1
hsa-miR-942-5p	chr6_118832460_118887479_-	150	-21.25	150	-21.25	22	1025	312	1
hsa-miR-942-5p	chr17_2297336_2298748_-	156	-21.07	156	-21.07	22	734	576	1
hsa-miR-942-5p	chr7_65705311_65706257_+	167	-24.82	167	-24.82	22	946	443	1
hsa-miR-942-5p	chr8_141810557_141900868_-	157	-20.46	157	-20.46	22	1125	720	1
hsa-miR-942-5p	chr7_65705311_65751696_+	167	-24.82	167	-24.82	22	1145	443	1
hsa-miR-942-5p	chr16_31102095_31102663_-	152	-21.26	152	-21.26	22	501	437	1
hsa-miR-942-5p	chr7_97820039_97823884_+	154	-23.7	154	-23.7	22	3109	2088	1
hsa-miR-942-5p	chr6_131276244_131277639_-	324	-47.41	169	-24.33	22	719	610 190	2
hsa-miR-942-5p	chr6_131247744_131277639_-	324	-47.41	169	-24.33	22	824	610 190	2
hsa-miR-942-5p	chr5_131013395_131044965_-	155	-20.99	155	-20.99	22	813	436	1
hsa-miR-942-5p	chr4_52729602_52758017_+	155	-20.13	155	-20.13	22	481	161	1
hsa-miR-1178-3p	chr11_92085261_92088570_+	165	-21.59	165	-21.59	21	3309	738	1
hsa-miR-1178-3p	chr6_131276244_131277639_-	308	-49.92	154	-24.96	21	719	442 466	2
hsa-miR-1178-3p	chr6_131247744_131277639_-	308	-49.92	154	-24.96	21	824	442 466	2
hsa-miR-1179	chr11_92085261_92088570_+	153	-23.61	153	-23.61	21	3309	2469	1
hsa-miR-1179	chr3_18419661_18462483_-	158	-20.52	158	-20.52	21	1599	582	1
hsa-miR-1179	chr17_2297336_2298748_-	152	-22.06	152	-22.06	21	734	625	1
hsa-miR-1180-3p	chr13_76195898_76335174_+	150	-28.97	150	-28.97	22	652	198	1
hsa-miR-1180-3p	chr9_111812562_111812972_-	154	-21.29	154	-21.29	22	269	15	1
hsa-miR-1180-3p	chr3_100565215_100581229_-	160	-21.28	160	-21.28	22	513	367	1
hsa-miR-1180-3p	chr3_100565215_100570784_-	160	-21.28	160	-21.28	22	438	292	1
hsa-miR-1181	chr7_97820039_97823884_+	150	-26.12	150	-26.12	21	3109	2224	1
hsa-miR-1182	chr3_114069120_114070725_-	164	-31.79	164	-31.79	23	1605	60	1
hsa-miR-1182	chr1_41536266_41541123_-	162	-26.88	162	-26.88	23	360	127	1
hsa-miR-1182	chr16_53175090_53191453_+	152	-28.56	152	-28.56	23	1616	1234	1
hsa-miR-1182	chr10_32854485_32873232_+	151	-23.13	151	-23.13	23	536	220	1
hsa-miR-1182	chr1_185183638_185200840_+	152	-24.5	152	-24.5	23	469	91	1
hsa-miR-1182	chr16_53288349_53308214_+	158	-23.47	158	-23.47	23	1106	568	1
hsa-miR-1182	chr4_87614739_87622954_+	151	-24.02	151	-24.02	23	649	129	1
hsa-miR-1182	chr3_112968568_112969680_+	153	-27.66	153	-27.66	23	457	332	1
hsa-miR-1183	chr11_92085261_92088570_+	313	-53.42	159	-31.72	27	3309	2814 1522	2
hsa-miR-1183	chr8_22054192_22054933_+	150	-29.3	150	-29.3	27	342	103	1
hsa-miR-1183	chr11_103173821_103194718_+	162	-25.24	162	-25.24	27	944	347	1
hsa-miR-1183	chr4_62800557_62910267_+	305	-50.58	153	-25.56	27	1702	1415 1067	2
hsa-miR-1183	chr9_111812562_111812972_-	153	-31.93	153	-31.93	27	269	61	1
hsa-miR-1183	chr4_48371865_48396670_+	154	-21.47	154	-21.47	27	971	189	1
hsa-miR-1183	chr8_17570722_17581342_-	152	-32.77	152	-32.77	27	336	110	1
hsa-miR-1184	chr11_92085261_92088570_+	151	-25.59	151	-25.59	23	3309	3187	1
hsa-miR-1184	chr7_90355880_90419967_+	153	-24.25	153	-24.25	23	421	366	1
hsa-miR-1184	chr19_17212469_17213367_+	151	-20.73	151	-20.73	23	898	365	1
hsa-miR-1184	chr9_35546426_35548532_+	307	-45.53	157	-24.67	23	2106	828 391	2
hsa-miR-1184	chr7_99621041_99621930_+	311	-56	158	-30.4	23	668	417 326	2
hsa-miR-1184	chr1_243776972_244006584_-	154	-23.71	154	-23.71	23	808	409	1
hsa-miR-1184	chr14_31596990_31602881_-	163	-24.85	163	-24.85	23	1403	531	1
hsa-miR-1184	chr1_243708811_244006584_-	154	-23.71	154	-23.71	23	1363	409	1
hsa-miR-1225-5p	chr9_35546426_35548532_+	158	-37.36	158	-37.36	22	2106	1192	1
hsa-miR-1225-5p	chr3_114069120_114070725_-	154	-23.17	154	-23.17	22	1605	1202	1
hsa-miR-1225-3p	chr1_236969443_236979843_+	155	-26.73	155	-26.73	22	572	167	1
hsa-miR-1226-5p	chr13_76195898_76335174_+	158	-33.14	158	-33.14	26	652	229	1
hsa-miR-1226-5p	chr9_4286037_4286523_-	163	-27.58	163	-27.58	26	486	266	1
hsa-miR-1226-5p	chr19_17212469_17213367_+	168	-36.23	168	-36.23	26	898	811	1
hsa-miR-1226-5p	chr9_35546426_35548532_+	319	-60.52	162	-36.77	26	2106	1050 1125	2
hsa-miR-1226-5p	chr18_77170402_77171501_+	157	-27.96	157	-27.96	26	1099	884	1
hsa-miR-1226-5p	chr16_31102095_31102663_-	153	-26.26	153	-26.26	26	501	193	1
hsa-miR-1226-5p	chr7_97820039_97823884_+	305	-60.41	155	-33.35	26	3109	2881 57	2
hsa-miR-1226-5p	chr11_89165951_89185063_-	172	-33.83	172	-33.83	26	395	211	1
hsa-miR-1226-5p	chr5_131013395_131044965_-	150	-20.75	150	-20.75	26	813	636	1
hsa-miR-1226-5p	chr11_89155069_89185063_-	172	-33.83	172	-33.83	26	476	211	1
hsa-miR-1226-3p	chr13_76195898_76335174_+	156	-25.7	156	-25.7	22	652	8	1
hsa-miR-1226-3p	chr8_13356557_13357705_-	151	-28.06	151	-28.06	22	1148	614	1
hsa-miR-1226-3p	chr10_126631025_126631876_+	150	-20.08	150	-20.08	22	851	727	1
hsa-miR-1226-3p	chr8_141810557_141900868_-	155	-24.58	155	-24.58	22	1125	1065	1
hsa-miR-1227-5p	chr9_35546426_35548532_+	163	-32.33	163	-32.33	17	2106	537	1
hsa-miR-1227-3p	chr6_118832460_118887479_-	157	-26.66	157	-26.66	20	1025	268	1
hsa-miR-1228-5p	chr9_35546426_35548532_+	159	-26.09	159	-26.09	21	2106	1177	1
hsa-miR-1228-5p	chr5_176963358_176966148_-	158	-33.12	158	-33.12	21	866	637	1
hsa-miR-1228-5p	chr1_171537385_171544267_+	152	-29.25	152	-29.25	21	397	87	1
hsa-miR-1228-3p	chr9_37424841_37426651_+	156	-22.55	156	-22.55	20	321	44	1
hsa-miR-1228-3p	chr4_87685745_87689129_+	156	-21.07	156	-21.07	20	487	138	1
hsa-miR-1229-5p	chr17_2297336_2298748_-	156	-35.26	156	-35.26	24	734	213	1
hsa-miR-1229-5p	chr11_72695132_72700142_-	155	-24	155	-24	24	318	209	1
hsa-miR-1229-5p	chr4_103225473_103236987_-	162	-24.56	162	-24.56	24	621	31	1
hsa-miR-1229-3p	chr9_35546426_35548532_+	153	-31.24	153	-31.24	23	2106	702	1
hsa-miR-1229-3p	chr5_176963358_176966148_-	158	-21.79	158	-21.79	23	866	92	1
hsa-miR-1229-3p	chr9_128419929_128434922_-	165	-24.02	165	-24.02	23	567	230	1
hsa-miR-1231	chr3_18419661_18462483_-	150	-30.63	150	-30.63	20	1599	900	1
hsa-miR-1231	chr4_186168447_186188309_+	153	-21.97	153	-21.97	20	662	286	1
hsa-miR-1231	chr12_95602618_95605043_-	152	-24.92	152	-24.92	20	2425	2396	1
hsa-miR-1231	chr3_133907680_133914026_-	150	-28.01	150	-28.01	20	323	34	1
hsa-miR-1231	chr14_31596990_31602881_-	152	-20.97	152	-20.97	20	1403	515	1
hsa-miR-1231	chr9_87317073_87325706_+	152	-26.02	152	-26.02	20	371	280	1
hsa-miR-1233-5p	chr11_92085261_92088570_+	151	-33.61	151	-33.61	22	3309	123	1
hsa-miR-1233-5p	chr5_176963358_176966148_-	159	-27.21	159	-27.21	22	866	811	1
hsa-miR-1236-5p	chr11_92085261_92088570_+	162	-21.69	162	-21.69	22	3309	2760	1
hsa-miR-1236-5p	chr1_171537385_171544267_+	168	-21.38	168	-21.38	22	397	359	1
hsa-miR-1236-3p	chr8_22332466_22333137_+	168	-30.07	168	-30.07	22	323	93	1
hsa-miR-1236-3p	chr9_35546426_35548532_+	153	-26.15	153	-26.15	22	2106	348	1
hsa-miR-1236-3p	chr7_99621041_99621930_+	157	-22.5	157	-22.5	22	668	157	1
hsa-miR-1236-3p	chr1_154207066_154207767_+	156	-27.64	156	-27.64	22	298	239	1
hsa-miR-1237-5p	chr9_35546426_35548532_+	160	-29.85	160	-29.85	21	2106	1756	1
hsa-miR-1237-5p	chr18_77170402_77171501_+	155	-35.39	155	-35.39	21	1099	942	1
hsa-miR-1237-5p	chr5_176963358_176966148_-	150	-27.98	150	-27.98	21	866	673	1
hsa-miR-1237-3p	chr12_95602618_95605043_-	160	-25.97	160	-25.97	21	2425	1970	1
hsa-miR-1237-3p	chr14_31596990_31602881_-	155	-22.21	155	-22.21	21	1403	385	1
hsa-miR-1237-3p	chr1_154207066_154207767_+	150	-21.4	150	-21.4	21	298	28	1
hsa-miR-1238-5p	chr6_118832460_118887479_-	152	-23.35	152	-23.35	23	1025	619	1
hsa-miR-1238-5p	chr5_65349233_65350779_+	165	-20.37	165	-20.37	23	1546	1228	1
hsa-miR-1238-3p	chr11_92085261_92088570_+	156	-23.47	156	-23.47	20	3309	267	1
hsa-miR-1238-3p	chr19_17212469_17213367_+	157	-20.84	157	-20.84	20	898	265	1
hsa-miR-1200	chr9_4286037_4286523_-	161	-24.24	161	-24.24	22	486	272	1
hsa-miR-1200	chr19_17212469_17213367_+	150	-24.93	150	-24.93	22	898	338	1
hsa-miR-1200	chr12_12022357_12022903_+	150	-26.28	150	-26.28	22	546	177	1
hsa-miR-1200	chr7_97820039_97823884_+	157	-26.35	157	-26.35	22	3109	763	1
hsa-miR-1200	chr2_148653869_148657467_+	156	-22.69	156	-22.69	22	473	13	1
hsa-miR-1200	chr10_49609654_49618211_+	151	-22.23	151	-22.23	22	499	133	1
hsa-miR-1200	chr8_17570722_17581342_-	169	-25.85	169	-25.85	22	336	210	1
hsa-miR-1202	chr3_114069120_114070725_-	320	-52.81	165	-29.1	21	1605	150 1292	2
hsa-miR-663b	chr9_4286037_4286523_-	154	-27.95	154	-27.95	22	486	406	1
hsa-miR-663b	chr19_17212469_17213367_+	153	-36.02	153	-36.02	22	898	72	1
hsa-miR-663b	chr7_97820039_97823884_+	162	-33.87	162	-33.87	22	3109	460	1
hsa-miR-663b	chr1_154207066_154207767_+	159	-34.2	159	-34.2	22	298	112	1
hsa-miR-1204	chr8_13356557_13357705_-	150	-25.46	150	-25.46	21	1148	1086	1
hsa-miR-1204	chr3_183361267_183369064_+	162	-25.66	162	-25.66	21	1044	1022	1
hsa-miR-1205	chr11_103173821_103194718_+	154	-20.14	154	-20.14	20	944	813	1
hsa-miR-1205	chr9_87317073_87325706_+	157	-22.28	157	-22.28	20	371	341	1
hsa-miR-1207-5p	chr9_37424841_37426651_+	314	-62.7	162	-35.22	21	321	254 22	2
hsa-miR-1207-5p	chr17_2297336_2298748_-	310	-49.93	159	-25.07	21	734	321 160	2
hsa-miR-1207-5p	chr17_80521229_80526077_+	152	-31.5	152	-31.5	21	343	155	1
hsa-miR-1207-5p	chr18_77170402_77171501_+	150	-30.15	150	-30.15	21	1099	22	1
hsa-miR-1207-5p	chr1_41536266_41541123_-	150	-27.78	150	-27.78	21	360	149	1
hsa-miR-1207-3p	chr4_41015599_41016415_-	158	-24.96	158	-24.96	18	816	748	1
hsa-miR-1207-3p	chr12_95602618_95605043_-	157	-20.51	157	-20.51	18	2425	2380	1
hsa-miR-1208	chr9_128419929_128434922_-	150	-21.2	150	-21.2	20	567	500	1
hsa-miR-1208	chr4_87614739_87622954_+	156	-20.4	156	-20.4	20	649	6	1
hsa-miR-1285-5p	chr8_17601112_17613470_-	150	-21.87	150	-21.87	21	2441	898	1
hsa-miR-1285-3p	chr11_92085261_92088570_+	158	-25.23	158	-25.23	22	3309	533	1
hsa-miR-1285-3p	chr18_77170402_77171501_+	155	-21.44	155	-21.44	22	1099	334	1
hsa-miR-1285-3p	chr9_128419929_128434922_-	150	-20.22	150	-20.22	22	567	247	1
hsa-miR-1286	chr3_18419661_18462483_-	154	-22.54	154	-22.54	21	1599	1385	1
hsa-miR-1287-5p	chr11_92085261_92088570_+	151	-27.49	151	-27.49	22	3309	2887	1
hsa-miR-1287-5p	chr4_41015599_41016415_-	159	-23.58	159	-23.58	22	816	213	1
hsa-miR-1287-5p	chr12_12022357_12022903_+	155	-22.48	155	-22.48	22	546	317	1
hsa-miR-1287-5p	chr5_65349233_65350779_+	166	-28.39	166	-28.39	22	1546	1120	1
hsa-miR-1287-5p	chr4_62800557_62910267_+	165	-20.98	165	-20.98	22	1702	252	1
hsa-miR-1287-3p	chr7_97820039_97823884_+	159	-25.05	159	-25.05	22	3109	1803	1
hsa-miR-1289	chr11_103173821_103194718_+	163	-22.05	163	-22.05	23	944	430	1
hsa-miR-1289	chr5_131013395_131044965_-	150	-21.09	150	-21.09	23	813	549	1
hsa-miR-1291	chr4_41015599_41016415_-	151	-22.65	151	-22.65	24	816	544	1
hsa-miR-1291	chr4_106155053_106158508_+	150	-24.4	150	-24.4	24	3455	3206	1
hsa-miR-1291	chr17_60061531_60062451_-	155	-23.31	155	-23.31	24	503	457	1
hsa-miR-1293	chr21_36206706_36231875_-	152	-22.47	152	-22.47	22	297	200	1
hsa-miR-1293	chr18_77170402_77171501_+	165	-27.3	165	-27.3	22	1099	869	1
hsa-miR-1293	chr9_98740342_98766983_+	152	-26.63	152	-26.63	22	337	286	1
hsa-miR-1293	chr4_73956383_73958017_-	153	-21.25	153	-21.25	22	1634	1195	1
hsa-miR-1293	chr5_176963358_176966148_-	151	-21.76	151	-21.76	22	866	613	1
hsa-miR-1293	chr5_102432244_102433485_-	154	-23.48	154	-23.48	22	655	115	1
hsa-miR-1294	chr11_92085261_92088570_+	151	-21.09	151	-21.09	22	3309	3021	1
hsa-miR-1294	chr17_80521229_80526077_+	152	-23.02	152	-23.02	22	343	142	1
hsa-miR-1294	chr9_35546426_35548532_+	170	-27.93	170	-27.93	22	2106	1210	1
hsa-miR-1295a	chr19_17212469_17213367_+	154	-26.54	154	-26.54	21	898	88	1
hsa-miR-1299	chr17_80521229_80526077_+	158	-21.83	158	-21.83	22	343	122	1
hsa-miR-1299	chr9_35546426_35548532_+	157	-23.84	157	-23.84	22	2106	71	1
hsa-miR-1299	chr1_185183638_185200840_+	151	-23.68	151	-23.68	22	469	32	1
hsa-miR-1299	chr8_17601112_17613470_-	152	-32.62	152	-32.62	22	2441	1942	1
hsa-miR-1299	chr11_103173821_103194718_+	157	-21.24	157	-21.24	22	944	849	1
hsa-miR-1299	chr14_31596990_31602881_-	152	-22.64	152	-22.64	22	1403	1343	1
hsa-miR-1303	chr16_31733946_31734674_+	153	-20.31	153	-20.31	22	223	123	1
hsa-miR-1304-3p	chr8_17601112_17613470_-	150	-24.57	150	-24.57	22	2441	2355	1
hsa-miR-1305	chr11_92085261_92088570_+	154	-23.12	154	-23.12	22	3309	1130	1
hsa-miR-1305	chr2_190593385_190609514_+	155	-21.69	155	-21.69	22	1026	253	1
hsa-miR-1244	chr18_77170402_77171501_+	179	-28.51	179	-28.51	26	1099	428	1
hsa-miR-1244	chr14_89041036_89044484_+	171	-20.82	171	-20.82	26	418	231	1
hsa-miR-1244	chr9_128419929_128434922_-	152	-22.41	152	-22.41	26	567	72	1
hsa-miR-1244	chr3_183361267_183369064_+	176	-24.84	176	-24.84	26	1044	893	1
hsa-miR-1244	chr8_17601112_17613470_-	163	-20.6	163	-20.6	26	2441	795	1
hsa-miR-1244	chr2_190593385_190609514_+	166	-21.52	166	-21.52	26	1026	215	1
hsa-miR-1247-3p	chr7_97820039_97823884_+	154	-24.35	154	-24.35	24	3109	2344	1
hsa-miR-1247-3p	chr3_114069120_114070725_-	153	-31.02	153	-31.02	24	1605	385	1
hsa-miR-1248	chr11_92085261_92088570_+	153	-22.1	153	-22.1	27	3309	1307	1
hsa-miR-1248	chr1_185183638_185200840_+	158	-27.05	158	-27.05	27	469	180	1
hsa-miR-1248	chr1_58971731_59004982_-	161	-20.02	161	-20.02	27	1381	535	1
hsa-miR-1248	chr1_243776972_244006584_-	151	-20.72	151	-20.72	27	808	424	1
hsa-miR-1248	chr1_243708811_244006584_-	151	-20.72	151	-20.72	27	1363	424	1
hsa-miR-1249-5p	chr13_76195898_76335174_+	160	-29.62	160	-29.62	24	652	302	1
hsa-miR-1249-5p	chr21_38792600_38802702_+	165	-27.26	165	-27.26	24	86	8	1
hsa-miR-1249-5p	chr5_176963358_176966148_-	151	-25.17	151	-25.17	24	866	294	1
hsa-miR-1249-3p	chr9_35546426_35548532_+	150	-25.15	150	-25.15	22	2106	587	1
hsa-miR-1250-5p	chr10_126631025_126631876_+	163	-25.17	163	-25.17	21	851	193	1
hsa-miR-1250-5p	chr9_35546426_35548532_+	154	-24.79	154	-24.79	21	2106	932	1
hsa-miR-1250-5p	chr8_22054192_22054933_+	151	-26.32	151	-26.32	21	342	99	1
hsa-miR-1251-5p	chr7_99621041_99621930_+	160	-21.59	160	-21.59	21	668	376	1
hsa-miR-1251-3p	chr19_13039155_13039661_-	158	-26.58	158	-26.58	21	338	11	1
hsa-miR-1254	chr1_243776972_244006584_-	151	-23.41	151	-23.41	24	808	400	1
hsa-miR-1254	chr1_243708811_244006584_-	151	-23.41	151	-23.41	24	1363	400	1
hsa-miR-1254	chr8_17570722_17581342_-	150	-20.06	150	-20.06	24	336	242	1
hsa-miR-1255a	chr11_92085261_92088570_+	158	-22.84	158	-22.84	23	3309	55	1
hsa-miR-1256	chr1_115005725_115007010_-	155	-20.67	155	-20.67	22	397	125	1
hsa-miR-1256	chr19_13039155_13039661_-	150	-24.65	150	-24.65	22	338	14	1
hsa-miR-1256	chr19_22157530_22171711_-	159	-23.03	159	-23.03	22	302	36	1
hsa-miR-1258	chr19_4511522_4511918_-	156	-20.77	156	-20.77	21	396	110	1
hsa-miR-1260a	chr9_35546426_35548532_+	311	-49.88	160	-27.48	18	2106	191 704	2
hsa-miR-1261	chr1_227192694_227204751_-	152	-22.08	152	-22.08	19	546	240	1
hsa-miR-1265	chr7_65705311_65706257_+	332	-48.42	167	-24.48	22	946	359 817	2
hsa-miR-1265	chr7_65705311_65751696_+	332	-48.42	167	-24.48	22	1145	359 817	2
hsa-miR-1265	chr4_106155053_106158508_+	150	-22.38	150	-22.38	22	3455	2577	1
hsa-miR-1265	chr5_176963358_176966148_-	153	-21.69	153	-21.69	22	866	242	1
hsa-miR-1266-5p	chr6_131247744_131277639_-	156	-22.47	156	-22.47	23	824	794	1
hsa-miR-1266-3p	chr9_35546426_35548532_+	162	-23.69	162	-23.69	22	2106	596	1
hsa-miR-1266-3p	chr4_106155053_106158508_+	154	-21.78	154	-21.78	22	3455	2681	1
hsa-miR-1268a	chr21_36206706_36231875_-	163	-29.46	163	-29.46	18	297	216	1
hsa-miR-1269a	chr9_35546426_35548532_+	151	-28.52	151	-28.52	22	2106	847	1
hsa-miR-1269a	chr7_97820039_97823884_+	152	-25.4	152	-25.4	22	3109	1561	1
hsa-miR-1270	chr4_106155053_106158508_+	153	-24.65	153	-24.65	23	3455	1980	1
hsa-miR-1270	chr9_14120438_14179779_-	160	-21.27	160	-21.27	23	683	407	1
hsa-miR-1272	chr16_53175090_53191453_+	159	-20.33	159	-20.33	26	1616	1542	1
hsa-miR-1275	chr17_80521229_80526077_+	153	-27.33	153	-27.33	17	343	168	1
hsa-miR-1275	chr1_114372213_114377061_-	156	-26.49	156	-26.49	17	356	173	1
hsa-miR-1275	chr9_14120438_14179779_-	157	-23.82	157	-23.82	17	683	444	1
hsa-miR-1276	chr16_31102095_31102663_-	159	-21.35	159	-21.35	20	501	421	1
hsa-miR-302e	chr4_62800557_62910267_+	150	-20.65	150	-20.65	17	1702	250	1
hsa-miR-1278	chr2_190593385_190609514_+	154	-20.49	154	-20.49	22	1026	204	1
hsa-miR-1281	chr17_80521229_80526077_+	158	-23.15	158	-23.15	17	343	66	1
hsa-miR-1281	chr3_171969049_171979873_+	154	-24.11	154	-24.11	17	282	186	1
hsa-miR-1288-3p	chr4_106155053_106158508_+	161	-23.32	161	-23.32	21	3455	1955	1
hsa-miR-1288-3p	chr16_53175090_53191453_+	161	-31.58	161	-31.58	21	1616	507	1
hsa-miR-1252-5p	chr8_13356557_13357705_-	155	-22.56	155	-22.56	22	1148	400	1
hsa-miR-1255b-2-3p	chr11_92085261_92088570_+	172	-23.97	172	-23.97	22	3309	958	1
hsa-miR-1255b-2-3p	chr9_35546426_35548532_+	151	-26.68	151	-26.68	22	2106	182	1
hsa-miR-664a-5p	chr3_18419661_18462483_-	153	-26.28	153	-26.28	24	1599	813	1
hsa-miR-664a-5p	chr6_131276244_131277639_-	151	-20.57	151	-20.57	24	719	43	1
hsa-miR-664a-5p	chr6_131247744_131277639_-	151	-20.57	151	-20.57	24	824	43	1
hsa-miR-664a-5p	chr16_53175090_53191453_+	156	-21.69	156	-21.69	24	1616	727	1
hsa-miR-1306-5p	chr11_92085261_92088570_+	151	-21	151	-21	22	3309	1336	1
hsa-miR-1306-5p	chr9_35546426_35548532_+	156	-36.47	156	-36.47	22	2106	180	1
hsa-miR-1306-5p	chr4_87685745_87689129_+	169	-24.25	169	-24.25	22	487	133	1
hsa-miR-1307-3p	chr2_200233327_200298237_-	150	-25.63	150	-25.63	22	531	60	1
hsa-miR-513b-5p	chr12_95602618_95605043_-	160	-25.42	160	-25.42	22	2425	1220	1
hsa-miR-513c-5p	chr3_183361267_183369064_+	154	-20.76	154	-20.76	22	1044	528	1
hsa-miR-1321	chr5_131013395_131044965_-	152	-20.17	152	-20.17	18	813	353	1
hsa-miR-1322	chr4_106155053_106158508_+	155	-20.44	155	-20.44	19	3455	3104	1
hsa-miR-1324	chr19_22157530_22171711_-	157	-27.44	157	-27.44	24	302	18	1
hsa-miR-1470	chr14_105412025_105412520_-	166	-36.13	166	-36.13	21	495	94	1
hsa-miR-1538	chr19_17212469_17213367_+	159	-38.03	159	-38.03	23	898	67	1
hsa-miR-1538	chr9_35546426_35548532_+	156	-29.15	156	-29.15	23	2106	1670	1
hsa-miR-1538	chr8_22054192_22054933_+	158	-32.67	158	-32.67	23	342	33	1
hsa-miR-1539	chr19_17212469_17213367_+	161	-24	161	-24	21	898	425	1
hsa-miR-103b	chr9_35546426_35548532_+	153	-20.3	153	-20.3	23	2106	875	1
hsa-miR-103b	chr3_171969049_171979873_+	164	-20.09	164	-20.09	23	282	146	1
hsa-miR-103b	chr1_115005725_115007010_-	159	-20.77	159	-20.77	23	397	164	1
hsa-miR-1908-5p	chr13_76195898_76335174_+	163	-29.56	163	-29.56	21	652	239	1
hsa-miR-1908-5p	chr17_2297336_2298748_-	302	-55.94	151	-28.61	21	734	129 160	2
hsa-miR-1908-5p	chr18_77170402_77171501_+	314	-64.95	161	-35.06	21	1099	20 718	2
hsa-miR-1908-5p	chr12_12022357_12022903_+	153	-25.58	153	-25.58	21	546	490	1
hsa-miR-1908-3p	chr19_17212469_17213367_+	161	-33.53	161	-33.53	21	898	33	1
hsa-miR-1909-5p	chr18_77170402_77171501_+	151	-21.54	151	-21.54	21	1099	564	1
hsa-miR-1909-5p	chr3_114069120_114070725_-	307	-49.34	157	-27.15	21	1605	519 426	2
hsa-miR-1909-3p	chr11_92085261_92088570_+	163	-34.91	163	-34.91	22	3309	40	1
hsa-miR-1909-3p	chr3_18419661_18462483_-	157	-29.83	157	-29.83	22	1599	861	1
hsa-miR-1909-3p	chr17_2297336_2298748_-	301	-47.15	151	-24.72	22	734	348 317	2
hsa-miR-1909-3p	chr4_41015599_41016415_-	156	-21.9	156	-21.9	22	816	228	1
hsa-miR-1909-3p	chr18_77170402_77171501_+	150	-23.68	150	-23.68	22	1099	194	1
hsa-miR-1909-3p	chr5_176963358_176966148_-	306	-58.71	154	-30.05	22	866	770 105	2
hsa-miR-1909-3p	chr1_171537385_171544267_+	152	-22.84	152	-22.84	22	397	83	1
hsa-miR-1910-3p	chr9_37424841_37426651_+	159	-27.81	159	-27.81	20	321	73	1
hsa-miR-1910-3p	chr4_106155053_106158508_+	155	-20.1	155	-20.1	20	3455	674	1
hsa-miR-1911-3p	chr4_73956383_73958017_-	159	-21.08	159	-21.08	20	1634	601	1
hsa-miR-1911-3p	chr6_73005639_73043538_+	154	-20.51	154	-20.51	20	546	89	1
hsa-miR-1912	chr8_22332466_22333137_+	159	-23.9	159	-23.9	22	323	269	1
hsa-miR-1912	chr1_236969443_236979843_+	150	-22.06	150	-22.06	22	572	172	1
hsa-miR-1912	chr3_112968568_112969680_+	161	-26.18	161	-26.18	22	457	311	1
hsa-miR-1913	chr9_35546426_35548532_+	161	-36.12	161	-36.12	22	2106	171	1
hsa-miR-1913	chr3_171969049_171979873_+	152	-34.1	152	-34.1	22	282	185	1
hsa-miR-1913	chr7_99621041_99621930_+	150	-22.52	150	-22.52	22	668	188	1
hsa-miR-1914-5p	chr19_17212469_17213367_+	157	-25.65	157	-25.65	22	898	327	1
hsa-miR-1914-3p	chr18_77170402_77171501_+	150	-30.75	150	-30.75	22	1099	110	1
hsa-miR-1915-5p	chr16_31102095_31102663_-	151	-21.57	151	-21.57	22	501	175	1
hsa-miR-1915-5p	chr3_133907680_133914026_-	155	-23.46	155	-23.46	22	323	157	1
hsa-miR-1915-3p	chr2_200233327_200298237_-	156	-29.85	156	-29.85	20	531	128	1
hsa-miR-1915-3p	chr5_176963358_176966148_-	153	-24.7	153	-24.7	20	866	334	1
hsa-miR-1972	chr8_13356557_13357705_-	150	-23.26	150	-23.26	22	1148	986	1
hsa-miR-1972	chr7_65705311_65706257_+	329	-64.77	165	-37.26	22	946	243 19	2
hsa-miR-1972	chr7_65705311_65751696_+	329	-64.77	165	-37.26	22	1145	243 19	2
hsa-miR-1972	chr16_31102095_31102663_-	154	-27.17	154	-27.17	22	501	62	1
hsa-miR-1972	chr3_114069120_114070725_-	151	-25.1	151	-25.1	22	1605	1466	1
hsa-miR-1972	chr11_89165951_89185063_-	174	-30.15	174	-30.15	22	395	313	1
hsa-miR-1972	chr11_89155069_89185063_-	174	-30.15	174	-30.15	22	476	313	1
hsa-miR-1976	chr4_41015599_41016415_-	150	-23.4	150	-23.4	20	816	314	1
hsa-miR-1976	chr17_80521229_80526077_+	150	-22.18	150	-22.18	20	343	61	1
hsa-miR-1976	chr2_190593385_190609514_+	150	-24.06	150	-24.06	20	1026	22	1
hsa-miR-1976	chr10_34558584_34573173_-	158	-21.07	158	-21.07	20	354	90	1
hsa-miR-2110	chr16_53175090_53191453_+	150	-20.35	150	-20.35	22	1616	916	1
hsa-miR-2110	chr3_183361267_183369064_+	155	-24.52	155	-24.52	22	1044	162	1
hsa-miR-2110	chr1_58971731_59004982_-	167	-31.41	167	-31.41	22	1381	874	1
hsa-miR-2114-3p	chr12_95602618_95605043_-	154	-20.53	154	-20.53	21	2425	786	1
hsa-miR-2114-3p	chr7_104702610_104722244_+	150	-24.18	150	-24.18	21	1287	1121	1
hsa-miR-2115-5p	chr9_4286037_4286523_-	174	-27.33	174	-27.33	22	486	442	1
hsa-miR-2115-5p	chr9_35546426_35548532_+	155	-20.88	155	-20.88	22	2106	766	1
hsa-miR-2115-5p	chr10_32832227_32873232_+	150	-26.2	150	-26.2	22	597	504	1
hsa-miR-2115-5p	chr10_32854485_32873232_+	150	-26.2	150	-26.2	22	536	134	1
hsa-miR-2115-5p	chr4_62800557_62910267_+	167	-20.21	167	-20.21	22	1702	241	1
hsa-miR-2115-3p	chr8_13356557_13357705_-	315	-45.03	165	-23.11	22	1148	182 442	2
hsa-miR-2115-3p	chr1_115005725_115007010_-	164	-21.9	164	-21.9	22	397	84	1
hsa-miR-2276-5p	chr8_22054192_22054933_+	155	-22.06	155	-22.06	22	342	134	1
hsa-miR-2276-5p	chr14_105412025_105412520_-	152	-20.5	152	-20.5	22	495	355	1
hsa-miR-2276-5p	chr1_243776972_244006584_-	155	-21.49	155	-21.49	22	808	79	1
hsa-miR-2276-5p	chr7_104702610_104722244_+	155	-25.34	155	-25.34	22	1287	804	1
hsa-miR-2276-5p	chr1_243708811_244006584_-	155	-21.49	155	-21.49	22	1363	79	1
hsa-miR-2276-3p	chr8_13356557_13357705_-	163	-26.74	163	-26.74	22	1148	227	1
hsa-miR-2276-3p	chr1_185183638_185200840_+	158	-31	158	-31	22	469	128	1
hsa-miR-2277-5p	chr18_77170402_77171501_+	153	-23.4	153	-23.4	24	1099	582	1
hsa-miR-2277-3p	chr8_17570722_17581342_-	150	-21.53	150	-21.53	21	336	160	1
hsa-miR-2278	chr9_37424841_37426651_+	154	-21.49	154	-21.49	22	321	67	1
hsa-miR-2278	chr6_107824860_107827631_+	154	-34.36	154	-34.36	22	325	113	1
hsa-miR-2278	chr4_62800557_62910267_+	156	-20.69	156	-20.69	22	1702	852	1
hsa-miR-2682-5p	chr21_36206706_36231875_-	321	-43.37	164	-22.23	23	297	244 10	2
hsa-miR-2682-5p	chr4_106155053_106158508_+	153	-22.2	153	-22.2	23	3455	148	1
hsa-miR-2682-5p	chr9_87317073_87325706_+	151	-21.43	151	-21.43	23	371	297	1
hsa-miR-2682-3p	chr10_126631025_126631876_+	169	-25.14	169	-25.14	22	851	588	1
hsa-miR-2682-3p	chr19_17212469_17213367_+	159	-21.32	159	-21.32	22	898	54	1
hsa-miR-2682-3p	chr9_35546426_35548532_+	156	-22.73	156	-22.73	22	2106	351	1
hsa-miR-2682-3p	chr16_31102095_31102663_-	162	-20.78	162	-20.78	22	501	185	1
hsa-miR-2682-3p	chr7_99621041_99621930_+	150	-22.61	150	-22.61	22	668	448	1
hsa-miR-711	chr3_18419661_18462483_-	154	-24.87	154	-24.87	22	1599	1381	1
hsa-miR-711	chr16_31733946_31734674_+	150	-28.84	150	-28.84	22	223	111	1
hsa-miR-711	chr1_236969443_236979843_+	151	-22.3	151	-22.3	22	572	174	1
hsa-miR-2861	chr2_200233327_200298237_-	152	-27.31	152	-27.31	19	531	155	1
hsa-miR-2861	chr9_35546426_35548532_+	486	-92.73	165	-33.22	19	2106	1373 1391 1237	3
hsa-miR-2861	chr1_41536266_41541123_-	151	-28.01	151	-28.01	19	360	335	1
hsa-miR-2909	chr5_131013395_131044965_-	161	-21.4	161	-21.4	21	813	238	1
hsa-miR-2909	chr14_31596990_31602881_-	150	-21.04	150	-21.04	21	1403	802	1
hsa-miR-2909	chr16_53288349_53308214_+	154	-21.63	154	-21.63	21	1106	237	1
hsa-miR-3116	chr14_105412025_105412520_-	158	-25.21	158	-25.21	22	495	323	1
hsa-miR-3120-5p	chr7_30590251_30601744_-	156	-20.91	156	-20.91	21	308	115	1
hsa-miR-3120-5p	chr12_95602618_95605043_-	159	-22.99	159	-22.99	21	2425	578	1
hsa-miR-3120-5p	chr11_120343758_120348235_+	166	-24.33	166	-24.33	21	577	375	1
hsa-miR-3120-3p	chr12_95602618_95605043_-	158	-23.1	158	-23.1	21	2425	1283	1
hsa-miR-3120-3p	chr5_176963358_176966148_-	151	-25.19	151	-25.19	21	866	20	1
hsa-miR-3120-3p	chr4_62800557_62910267_+	162	-23.78	162	-23.78	21	1702	1501	1
hsa-miR-3121-5p	chr3_169694733_169706147_+	163	-21.01	163	-21.01	22	585	23	1
hsa-miR-3122	chr2_148653869_148657467_+	154	-25.93	154	-25.93	22	473	445	1
hsa-miR-3124-5p	chr3_114069120_114070725_-	157	-25.29	157	-25.29	21	1605	619	1
hsa-miR-3124-3p	chr11_92085261_92088570_+	151	-21.89	151	-21.89	22	3309	952	1
hsa-miR-3124-3p	chr4_62800557_62910267_+	152	-22.09	152	-22.09	22	1702	99	1
hsa-miR-3125	chrX_147743428_147744289_+	157	-23.61	157	-23.61	20	861	571	1
hsa-miR-3125	chr6_118832460_118887479_-	152	-20.97	152	-20.97	20	1025	482	1
hsa-miR-3125	chr4_106155053_106158508_+	153	-26.98	153	-26.98	20	3455	1278	1
hsa-miR-3125	chr5_131013395_131044965_-	170	-22.3	170	-22.3	20	813	349	1
hsa-miR-3125	chr1_243708811_244006584_-	150	-20.22	150	-20.22	20	1363	1310	1
hsa-miR-3126-5p	chr14_31596990_31602881_-	154	-20.64	154	-20.64	22	1403	712	1
hsa-miR-3127-5p	chr4_41015599_41016415_-	160	-24.92	160	-24.92	23	816	619	1
hsa-miR-3127-5p	chr1_227192694_227204751_-	156	-27.53	156	-27.53	23	546	351	1
hsa-miR-3127-5p	chr9_35546426_35548532_+	155	-32.09	155	-32.09	23	2106	1306	1
hsa-miR-3127-5p	chr7_65705311_65706257_+	150	-24.26	150	-24.26	23	946	412	1
hsa-miR-3127-5p	chr7_65705311_65751696_+	150	-24.26	150	-24.26	23	1145	412	1
hsa-miR-3127-5p	chr12_95602618_95605043_-	152	-24.81	152	-24.81	23	2425	141	1
hsa-miR-3127-5p	chr6_131247744_131277639_-	164	-22.77	164	-22.77	23	824	794	1
hsa-miR-3127-5p	chr4_52729602_52758017_+	157	-20.74	157	-20.74	23	481	322	1
hsa-miR-3127-5p	chr4_48371865_48396670_+	153	-22.76	153	-22.76	23	971	75	1
hsa-miR-3127-5p	chr3_100565215_100581229_-	168	-20.02	168	-20.02	23	513	397	1
hsa-miR-3127-5p	chr3_100565215_100570784_-	168	-20.02	168	-20.02	23	438	322	1
hsa-miR-3127-3p	chr12_95602618_95605043_-	162	-34.68	162	-34.68	22	2425	1972	1
hsa-miR-3127-3p	chr4_73956383_73958017_-	151	-28.53	151	-28.53	22	1634	815	1
hsa-miR-3127-3p	chr1_154207066_154207767_+	155	-26.15	155	-26.15	22	298	261	1
hsa-miR-3130-3p	chr4_106155053_106158508_+	151	-22.41	151	-22.41	21	3455	758	1
hsa-miR-3130-3p	chr5_176963358_176966148_-	160	-25.86	160	-25.86	21	866	759	1
hsa-miR-3130-3p	chr1_243708811_244006584_-	154	-21.43	154	-21.43	21	1363	852	1
hsa-miR-3130-3p	chr3_169694733_169706147_+	156	-24.29	156	-24.29	21	585	531	1
hsa-miR-3130-3p	chr4_48371865_48396670_+	154	-20.72	154	-20.72	21	971	49	1
hsa-miR-3131	chr18_77170402_77171501_+	156	-29.6	156	-29.6	23	1099	204	1
hsa-miR-3131	chr5_176963358_176966148_-	157	-21.44	157	-21.44	23	866	285	1
hsa-miR-3131	chr7_99621041_99621930_+	159	-27.26	159	-27.26	23	668	568	1
hsa-miR-3131	chr1_58971731_59004982_-	154	-23.06	154	-23.06	23	1381	1086	1
hsa-miR-3132	chrX_147743428_147744289_+	166	-24.77	166	-24.77	24	861	397	1
hsa-miR-3132	chr6_118832460_118887479_-	160	-27.5	160	-27.5	24	1025	483	1
hsa-miR-3132	chr17_2297336_2298748_-	152	-21.49	152	-21.49	24	734	211	1
hsa-miR-3132	chr14_105412025_105412520_-	152	-30.11	152	-30.11	24	495	307	1
hsa-miR-3132	chr5_176963358_176966148_-	167	-27.78	167	-27.78	24	866	708	1
hsa-miR-378b	chrX_147743428_147744289_+	160	-25.91	160	-25.91	19	861	18	1
hsa-miR-3136-5p	chr11_103173821_103194718_+	168	-20.12	168	-20.12	23	944	708	1
hsa-miR-3136-5p	chr7_33388679_33427756_+	158	-25.65	158	-25.65	23	786	361	1
hsa-miR-3136-3p	chr6_118832460_118887479_-	158	-22.28	158	-22.28	22	1025	349	1
hsa-miR-544b	chr1_227192694_227204751_-	164	-23.11	164	-23.11	22	546	424	1
hsa-miR-544b	chr19_17212469_17213367_+	154	-20.05	154	-20.05	22	898	342	1
hsa-miR-544b	chr4_106155053_106158508_+	153	-20.13	153	-20.13	22	3455	841	1
hsa-miR-544b	chr4_48371865_48396670_+	160	-20.92	160	-20.92	22	971	942	1
hsa-miR-3137	chr3_18419661_18462483_-	156	-21.14	156	-21.14	24	1599	458	1
hsa-miR-3137	chr12_95602618_95605043_-	164	-23.59	164	-23.59	24	2425	1484	1
hsa-miR-3137	chr3_114069120_114070725_-	167	-23.6	167	-23.6	24	1605	192	1
hsa-miR-3138	chr19_17212469_17213367_+	167	-25.9	167	-25.9	24	898	114	1
hsa-miR-3139	chr4_106155053_106158508_+	155	-21.87	155	-21.87	23	3455	1115	1
hsa-miR-3139	chr1_115005725_115007010_-	154	-23.34	154	-23.34	23	397	73	1
hsa-miR-3139	chr3_183361267_183369064_+	155	-21.63	155	-21.63	23	1044	854	1
hsa-miR-3140-3p	chr12_129299319_129299615_-	155	-25.17	155	-25.17	22	296	250	1
hsa-miR-3140-3p	chr12_95602618_95605043_-	155	-22.32	155	-22.32	22	2425	2071	1
hsa-miR-3140-3p	chr2_190593385_190609514_+	151	-21.72	151	-21.72	22	1026	698	1
hsa-miR-548t-5p	chr7_90355880_90419967_+	158	-21.13	158	-21.13	21	421	97	1
hsa-miR-3141	chr19_17212469_17213367_+	151	-29.49	151	-29.49	19	898	818	1
hsa-miR-3141	chr18_77170402_77171501_+	151	-24.17	151	-24.17	19	1099	685	1
hsa-miR-3141	chr5_176963358_176966148_-	157	-33.43	157	-33.43	19	866	334	1
hsa-miR-3141	chr7_97820039_97823884_+	151	-33.78	151	-33.78	19	3109	2369	1
hsa-miR-3143	chr11_103173821_103194718_+	151	-24.91	151	-24.91	25	944	134	1
hsa-miR-3143	chr4_103225473_103236987_-	151	-20.25	151	-20.25	25	621	417	1
hsa-miR-3144-3p	chr2_8910799_8917022_-	153	-23.23	153	-23.23	22	308	255	1
hsa-miR-3144-3p	chr1_115005725_115007010_-	152	-20.19	152	-20.19	22	397	104	1
hsa-miR-3144-3p	chr11_89133184_89135710_-	168	-21.11	168	-21.11	22	445	258	1
hsa-miR-3145-3p	chr1_243708811_244006584_-	160	-20.73	160	-20.73	24	1363	1025	1
hsa-miR-3147	chr21_36206706_36231875_-	162	-34.17	162	-34.17	24	297	213	1
hsa-miR-3147	chr17_2297336_2298748_-	152	-27.82	152	-27.82	24	734	322	1
hsa-miR-3147	chr14_105412025_105412520_-	165	-29.22	165	-29.22	24	495	311	1
hsa-miR-3147	chr10_32832227_32873232_+	153	-29.09	153	-29.09	24	597	415	1
hsa-miR-3147	chr10_32854485_32873232_+	153	-29.09	153	-29.09	24	536	45	1
hsa-miR-3147	chr1_171537385_171544267_+	317	-59.99	161	-36.36	24	397	20 87	2
hsa-miR-3148	chr18_77170402_77171501_+	158	-20.47	158	-20.47	22	1099	264	1
hsa-miR-3149	chr4_106155053_106158508_+	157	-20.25	157	-20.25	23	3455	2801	1
hsa-miR-3150a-5p	chr4_87685745_87689129_+	156	-24.88	156	-24.88	22	487	70	1
hsa-miR-3150a-3p	chr11_92085261_92088570_+	302	-45.3	152	-23.75	22	3309	1618 2797	2
hsa-miR-3150a-3p	chr10_126631025_126631876_+	150	-24.16	150	-24.16	22	851	379	1
hsa-miR-3150a-3p	chr17_2297336_2298748_-	150	-20.7	150	-20.7	22	734	416	1
hsa-miR-3150a-3p	chr7_97820039_97823884_+	160	-22.96	160	-22.96	22	3109	2357	1
hsa-miR-3151-5p	chr17_2297336_2298748_-	151	-26.86	151	-26.86	21	734	164	1
hsa-miR-3151-5p	chr9_35546426_35548532_+	154	-24.9	154	-24.9	21	2106	980	1
hsa-miR-3151-5p	chr5_176963358_176966148_-	150	-28.17	150	-28.17	21	866	522	1
hsa-miR-3074-5p	chr3_18419661_18462483_-	165	-20.6	165	-20.6	21	1599	1519	1
hsa-miR-3074-5p	chr8_131370262_131374017_-	154	-22.33	154	-22.33	21	229	187	1
hsa-miR-3074-3p	chr1_243776972_244006584_-	154	-20.55	154	-20.55	22	808	48	1
hsa-miR-3074-3p	chr1_243708811_244006584_-	154	-20.55	154	-20.55	22	1363	48	1
hsa-miR-3154	chr21_37619814_37620866_+	157	-21.61	157	-21.61	22	301	30	1
hsa-miR-3154	chr3_114069120_114070725_-	154	-24.57	154	-24.57	22	1605	165	1
hsa-miR-3156-5p	chr11_92085261_92088570_+	164	-24.5	164	-24.5	22	3309	2891	1
hsa-miR-3156-5p	chr19_13039155_13039661_-	170	-26.76	170	-26.76	22	338	187	1
hsa-miR-3156-5p	chr10_32854485_32873232_+	165	-21.77	165	-21.77	22	536	210	1
hsa-miR-3158-5p	chr9_35546426_35548532_+	161	-20.63	161	-20.63	21	2106	1012	1
hsa-miR-3158-3p	chr9_4286037_4286523_-	157	-26.94	157	-26.94	22	486	441	1
hsa-miR-3158-3p	chr12_122825299_122826244_-	154	-25.13	154	-25.13	22	945	557	1
hsa-miR-3158-3p	chr4_106155053_106158508_+	151	-24.16	151	-24.16	22	3455	143	1
hsa-miR-3160-5p	chr12_95602618_95605043_-	156	-21.94	156	-21.94	22	2425	1578	1
hsa-miR-3162-5p	chr11_92085261_92088570_+	152	-21.72	152	-21.72	23	3309	3120	1
hsa-miR-3162-5p	chr21_36206706_36231875_-	152	-29.61	152	-29.61	23	297	229	1
hsa-miR-3162-5p	chr5_176963358_176966148_-	155	-29.77	155	-29.77	23	866	831	1
hsa-miR-3162-5p	chr1_171537385_171544267_+	176	-35.31	176	-35.31	23	397	101	1
hsa-miR-3164	chr2_148653869_148657467_+	151	-20.21	151	-20.21	22	473	288	1
hsa-miR-3165	chr1_58971731_59004982_-	171	-27.96	171	-27.96	22	1381	97	1
hsa-miR-3165	chr3_133907680_133914026_-	152	-20.99	152	-20.99	22	323	27	1
hsa-miR-3166	chr14_105412025_105412520_-	150	-27.58	150	-27.58	23	495	220	1
hsa-miR-1260b	chr9_35546426_35548532_+	326	-54.77	173	-31.87	19	2106	190 706	2
hsa-miR-3169	chr9_35546426_35548532_+	321	-48.02	165	-24.53	22	2106	462 990	2
hsa-miR-3169	chr7_97820039_97823884_+	157	-22.87	157	-22.87	22	3109	2405	1
hsa-miR-3169	chr8_17601112_17613470_-	158	-21.85	158	-21.85	22	2441	1432	1
hsa-miR-3169	chr10_49609654_49618211_+	154	-20.09	154	-20.09	22	499	97	1
hsa-miR-3170	chrX_147743428_147744289_+	153	-21.95	153	-21.95	22	861	117	1
hsa-miR-3170	chr9_4286037_4286523_-	150	-27.38	150	-27.38	22	486	338	1
hsa-miR-3170	chr9_35546426_35548532_+	153	-27.82	153	-27.82	22	2106	1950	1
hsa-miR-3170	chr16_31102095_31102663_-	159	-26.06	159	-26.06	22	501	167	1
hsa-miR-3170	chr7_97820039_97823884_+	154	-27.85	154	-27.85	22	3109	2494	1
hsa-miR-3170	chr4_87685745_87689129_+	159	-20.84	159	-20.84	22	487	372	1
hsa-miR-3173-3p	chr8_13356557_13357705_-	154	-21.82	154	-21.82	22	1148	953	1
hsa-miR-3173-3p	chr7_30590251_30601744_-	160	-20.97	160	-20.97	22	308	184	1
hsa-miR-3173-3p	chr7_97820039_97823884_+	153	-21.04	153	-21.04	22	3109	1441	1
hsa-miR-1193	chr19_17212469_17213367_+	152	-26.42	152	-26.42	23	898	853	1
hsa-miR-1193	chr5_176963358_176966148_-	151	-23.3	151	-23.3	23	866	457	1
hsa-miR-1193	chr2_24357988_24369956_+	151	-20.97	151	-20.97	23	587	332	1
hsa-miR-1193	chr4_62800557_62910267_+	155	-22.54	155	-22.54	23	1702	808	1
hsa-miR-1193	chr9_111812562_111812972_-	154	-24.63	154	-24.63	23	269	54	1
hsa-miR-323b-5p	chr13_76195898_76335174_+	155	-22.52	155	-22.52	23	652	266	1
hsa-miR-323b-5p	chr19_17212469_17213367_+	165	-32.29	165	-32.29	23	898	521	1
hsa-miR-323b-5p	chr7_97820039_97823884_+	154	-34.08	154	-34.08	23	3109	1909	1
hsa-miR-323b-5p	chr3_100565215_100581229_-	151	-23.71	151	-23.71	23	513	414	1
hsa-miR-323b-5p	chr3_100565215_100570784_-	151	-23.71	151	-23.71	23	438	339	1
hsa-miR-3174	chr8_17601112_17613470_-	152	-23.01	152	-23.01	23	2441	1912	1
hsa-miR-3174	chr11_103173821_103194718_+	159	-27.82	159	-27.82	23	944	315	1
hsa-miR-3175	chr12_12022357_12022903_+	154	-24.45	154	-24.45	22	546	487	1
hsa-miR-3175	chr4_106155053_106158508_+	160	-20.2	160	-20.2	22	3455	1250	1
hsa-miR-3175	chr5_65349233_65350779_+	165	-26.8	165	-26.8	22	1546	465	1
hsa-miR-3175	chr1_114372213_114377061_-	156	-23.62	156	-23.62	22	356	165	1
hsa-miR-3176	chrX_147743428_147744289_+	150	-27.4	150	-27.4	19	861	327	1
hsa-miR-3176	chr1_154207066_154207767_+	173	-30.11	173	-30.11	19	298	28	1
hsa-miR-3177-5p	chr10_126631025_126631876_+	155	-23.05	155	-23.05	23	851	299	1
hsa-miR-3177-3p	chr10_126631025_126631876_+	151	-23.87	151	-23.87	21	851	104	1
hsa-miR-3180-5p	chr7_99621041_99621930_+	151	-25.79	151	-25.79	25	668	548	1
hsa-miR-3180-5p	chr1_154207066_154207767_+	163	-25.95	163	-25.95	25	298	233	1
hsa-miR-3180-3p	chr17_2297336_2298748_-	153	-26.35	153	-26.35	22	734	486	1
hsa-miR-3180-3p	chr7_99621041_99621930_+	306	-57.5	155	-30.14	22	668	431 634	2
hsa-miR-3181	chr7_97820039_97823884_+	167	-33.07	167	-33.07	19	3109	2748	1
hsa-miR-3183	chr7_30590251_30601744_-	153	-23.71	153	-23.71	22	308	93	1
hsa-miR-3183	chr9_128419929_128434922_-	150	-27.05	150	-27.05	22	567	337	1
hsa-miR-3183	chr3_133907680_133914026_-	160	-23.52	160	-23.52	22	323	186	1
hsa-miR-3183	chr4_87614739_87622954_+	159	-27.18	159	-27.18	22	649	586	1
hsa-miR-3184-5p	chr12_12022357_12022903_+	158	-20.5	158	-20.5	24	546	118	1
hsa-miR-3184-5p	chr4_106155053_106158508_+	160	-26.84	160	-26.84	24	3455	1734	1
hsa-miR-3184-5p	chr5_176963358_176966148_-	150	-28.54	150	-28.54	24	866	61	1
hsa-miR-3185	chr10_126631025_126631876_+	158	-22.53	158	-22.53	23	851	593	1
hsa-miR-3185	chr8_22054192_22054933_+	150	-21.01	150	-21.01	23	342	317	1
hsa-miR-3185	chr3_171969049_171979873_+	162	-21.06	162	-21.06	23	282	107	1
hsa-miR-3185	chr19_13039155_13039661_-	162	-25.47	162	-25.47	23	338	311	1
hsa-miR-3185	chr3_114069120_114070725_-	166	-28.24	166	-28.24	23	1605	166	1
hsa-miR-3185	chr16_53175090_53191453_+	150	-20.47	150	-20.47	23	1616	1389	1
hsa-miR-3185	chr9_111812562_111812972_-	153	-21.12	153	-21.12	23	269	214	1
hsa-miR-3065-5p	chr14_31596990_31602881_-	162	-22.62	162	-22.62	23	1403	964	1
hsa-miR-3065-3p	chr19_17212469_17213367_+	158	-23.61	158	-23.61	23	898	862	1
hsa-miR-3065-3p	chr9_35546426_35548532_+	169	-26.57	169	-26.57	23	2106	45	1
hsa-miR-3065-3p	chr5_176963358_176966148_-	151	-23.49	151	-23.49	23	866	82	1
hsa-miR-3065-3p	chr11_103173821_103194718_+	155	-20.4	155	-20.4	23	944	76	1
hsa-miR-3065-3p	chr3_3197902_3215945_-	150	-20.12	150	-20.12	23	576	1	1
hsa-miR-3186-3p	chr19_17212469_17213367_+	157	-26.7	157	-26.7	21	898	148	1
hsa-miR-3186-3p	chr18_77170402_77171501_+	150	-23.09	150	-23.09	21	1099	484	1
hsa-miR-3187-5p	chr11_92085261_92088570_+	150	-27.03	150	-27.03	23	3309	533	1
hsa-miR-3187-5p	chr3_18419661_18462483_-	159	-30.05	159	-30.05	23	1599	382	1
hsa-miR-3187-5p	chr17_2297336_2298748_-	153	-24	153	-24	23	734	320	1
hsa-miR-3187-5p	chr18_77170402_77171501_+	161	-33.54	161	-33.54	23	1099	330	1
hsa-miR-3187-5p	chr4_186168447_186188309_+	155	-21.12	155	-21.12	23	662	515	1
hsa-miR-3187-5p	chr14_105412025_105412520_-	309	-42.55	156	-21.81	23	495	411 309	2
hsa-miR-3187-5p	chr1_115005725_115007010_-	161	-22.3	161	-22.3	23	397	1	1
hsa-miR-3187-5p	chr5_176963358_176966148_-	308	-57.95	154	-29.64	23	866	606 634	2
hsa-miR-3187-5p	chr9_128419929_128434922_-	150	-20.6	150	-20.6	23	567	249	1
hsa-miR-3187-5p	chr7_97820039_97823884_+	154	-29.36	154	-29.36	23	3109	2430	1
hsa-miR-3187-3p	chr4_41015599_41016415_-	155	-24.43	155	-24.43	20	816	20	1
hsa-miR-3187-3p	chr12_95602618_95605043_-	156	-24.69	156	-24.69	20	2425	2372	1
hsa-miR-3187-3p	chr1_58971731_59004982_-	158	-27.83	158	-27.83	20	1381	1283	1
hsa-miR-3188	chr12_129299319_129299615_-	163	-21.24	163	-21.24	23	296	186	1
hsa-miR-3188	chr3_171969049_171979873_+	152	-20.13	152	-20.13	23	282	40	1
hsa-miR-3188	chr4_106155053_106158508_+	154	-20.03	154	-20.03	23	3455	2193	1
hsa-miR-3188	chr12_95602618_95605043_-	150	-20.66	150	-20.66	23	2425	2192	1
hsa-miR-3188	chr11_89165951_89185063_-	153	-26.71	153	-26.71	23	395	5	1
hsa-miR-3188	chr11_89155069_89185063_-	153	-26.71	153	-26.71	23	476	5	1
hsa-miR-3189-5p	chrX_147743428_147744289_+	154	-22.15	154	-22.15	25	861	640	1
hsa-miR-3189-5p	chr18_77170402_77171501_+	162	-31.9	162	-31.9	25	1099	186	1
hsa-miR-3189-5p	chr6_107824860_107827631_+	150	-32.61	150	-32.61	25	325	91	1
hsa-miR-3189-5p	chr1_154207066_154207767_+	157	-20.83	157	-20.83	25	298	159	1
hsa-miR-3189-3p	chr2_200233327_200298237_-	156	-26.29	156	-26.29	21	531	159	1
hsa-miR-3189-3p	chr8_22054192_22054933_+	159	-26.91	159	-26.91	21	342	44	1
hsa-miR-3189-3p	chr4_106155053_106158508_+	152	-20.69	152	-20.69	21	3455	1961	1
hsa-miR-3189-3p	chr7_99621041_99621930_+	162	-26.2	162	-26.2	21	668	400	1
hsa-miR-3189-3p	chr8_17601112_17613470_-	154	-23.63	154	-23.63	21	2441	852	1
hsa-miR-3189-3p	chr4_87685745_87689129_+	153	-22.87	153	-22.87	21	487	403	1
hsa-miR-320e	chr12_95602618_95605043_-	160	-21.93	160	-21.93	18	2425	663	1
hsa-miR-3190-5p	chr17_2297336_2298748_-	151	-21.78	151	-21.78	20	734	51	1
hsa-miR-3190-5p	chr14_105412025_105412520_-	157	-26.39	157	-26.39	20	495	333	1
hsa-miR-3190-5p	chr14_31596990_31602881_-	160	-23.78	160	-23.78	20	1403	581	1
hsa-miR-3190-3p	chr11_92085261_92088570_+	155	-22.2	155	-22.2	23	3309	121	1
hsa-miR-3190-3p	chr4_106155053_106158508_+	155	-20.69	155	-20.69	23	3455	1263	1
hsa-miR-3191-5p	chr11_92085261_92088570_+	156	-20.4	156	-20.4	22	3309	2568	1
hsa-miR-3191-5p	chr17_2297336_2298748_-	152	-25.18	152	-25.18	22	734	572	1
hsa-miR-3191-5p	chr3_133907680_133914026_-	150	-21.87	150	-21.87	22	323	179	1
hsa-miR-3191-5p	chr8_17601112_17613470_-	151	-25.05	151	-25.05	22	2441	525	1
hsa-miR-3191-3p	chr18_77170402_77171501_+	305	-49	155	-25.11	23	1099	712 635	2
hsa-miR-3192-5p	chr11_92085261_92088570_+	156	-26.84	156	-26.84	23	3309	89	1
hsa-miR-3192-5p	chr3_18419661_18462483_-	156	-23.59	156	-23.59	23	1599	1173	1
hsa-miR-3192-5p	chr8_22054192_22054933_+	161	-26.47	161	-26.47	23	342	245	1
hsa-miR-3192-5p	chr14_89041036_89044484_+	152	-21.27	152	-21.27	23	418	275	1
hsa-miR-3192-5p	chr19_13039155_13039661_-	157	-29.7	157	-29.7	23	338	171	1
hsa-miR-3192-5p	chr7_97820039_97823884_+	151	-27.31	151	-27.31	23	3109	2817	1
hsa-miR-3192-5p	chr7_99621041_99621930_+	167	-25.18	167	-25.18	23	668	12	1
hsa-miR-3192-3p	chr7_90355880_90419967_+	151	-23.82	151	-23.82	21	421	359	1
hsa-miR-3192-3p	chr16_53288349_53308214_+	154	-21.9	154	-21.9	21	1106	261	1
hsa-miR-3193	chr21_36206706_36231875_-	154	-28.73	154	-28.73	22	297	276	1
hsa-miR-3194-5p	chr4_103225473_103236987_-	157	-25.45	157	-25.45	21	621	267	1
hsa-miR-3194-3p	chr4_41015599_41016415_-	153	-21.18	153	-21.18	22	816	297	1
hsa-miR-3194-3p	chr7_97820039_97823884_+	154	-20.28	154	-20.28	22	3109	225	1
hsa-miR-3194-3p	chr4_62800557_62910267_+	155	-23.34	155	-23.34	22	1702	845	1
hsa-miR-3194-3p	chr4_87685745_87689129_+	166	-30.15	166	-30.15	22	487	200	1
hsa-miR-3196	chr18_77170402_77171501_+	152	-26.67	152	-26.67	18	1099	946	1
hsa-miR-3197	chr17_2297336_2298748_-	156	-27.39	156	-27.39	23	734	260	1
hsa-miR-3198	chr4_62800557_62910267_+	151	-24.99	151	-24.99	22	1702	789	1
hsa-miR-3199	chr4_106155053_106158508_+	159	-22.71	159	-22.71	23	3455	1955	1
hsa-miR-3200-3p	chr7_99621041_99621930_+	151	-29.65	151	-29.65	22	668	532	1
hsa-miR-3202	chr21_38792600_38802702_+	165	-23.68	165	-23.68	22	86	16	1
hsa-miR-3202	chr4_103225473_103236987_-	159	-24.29	159	-24.29	22	621	12	1
hsa-miR-1273d	chr3_18419661_18462483_-	156	-31.89	156	-31.89	25	1599	1381	1
hsa-miR-1273d	chr4_52729602_52758017_+	153	-20.05	153	-20.05	25	481	416	1
hsa-miR-1273d	chr5_102432244_102433485_-	160	-22.86	160	-22.86	25	655	501	1
hsa-miR-4296	chr7_97820039_97823884_+	150	-25.52	150	-25.52	17	3109	2994	1
hsa-miR-4297	chr11_92085261_92088570_+	156	-22.49	156	-22.49	16	3309	272	1
hsa-miR-378c	chrX_147743428_147744289_+	154	-24.55	154	-24.55	25	861	12	1
hsa-miR-378c	chr4_41015599_41016415_-	155	-22.35	155	-22.35	25	816	609	1
hsa-miR-378c	chr9_35546426_35548532_+	156	-22.34	156	-22.34	25	2106	1428	1
hsa-miR-378c	chr12_12022357_12022903_+	162	-27.99	162	-27.99	25	546	383	1
hsa-miR-378c	chr11_120343758_120348235_+	155	-23.35	155	-23.35	25	577	552	1
hsa-miR-378c	chr7_99621041_99621930_+	150	-21.7	150	-21.7	25	668	558	1
hsa-miR-378c	chr9_87317073_87325706_+	155	-21.52	155	-21.52	25	371	274	1
hsa-miR-4293	chr4_73956383_73958017_-	150	-22.62	150	-22.62	17	1634	450	1
hsa-miR-4294	chr14_31596990_31602881_-	151	-24.68	151	-24.68	17	1403	541	1
hsa-miR-4301	chr9_35546426_35548532_+	153	-28.85	153	-28.85	20	2106	187	1
hsa-miR-4299	chr2_190593385_190609514_+	151	-26.59	151	-26.59	18	1026	122	1
hsa-miR-4299	chr9_14120438_14179779_-	154	-24.84	154	-24.84	18	683	309	1
hsa-miR-4298	chr13_76195898_76335174_+	151	-31.74	151	-31.74	22	652	312	1
hsa-miR-4298	chr2_148653869_148657467_+	155	-25.83	155	-25.83	22	473	447	1
hsa-miR-4298	chr11_89133184_89135710_-	153	-23.53	153	-23.53	22	445	383	1
hsa-miR-4302	chr3_112968568_112969680_+	157	-25.82	157	-25.82	18	457	118	1
hsa-miR-4305	chr9_87317073_87325706_+	150	-21.16	150	-21.16	18	371	164	1
hsa-miR-4308	chr4_106155053_106158508_+	154	-20.87	154	-20.87	18	3455	1053	1
hsa-miR-4308	chr14_89041036_89044484_+	151	-22.72	151	-22.72	18	418	323	1
hsa-miR-4308	chr1_58971731_59004982_-	159	-21.39	159	-21.39	18	1381	837	1
hsa-miR-4308	chr3_169694733_169706147_+	156	-26.4	156	-26.4	18	585	310	1
hsa-miR-4312	chr11_92085261_92088570_+	163	-23.25	163	-23.25	19	3309	2729	1
hsa-miR-4313	chr19_4511522_4511918_-	158	-25.48	158	-25.48	20	396	366	1
hsa-miR-4315	chr19_17212469_17213367_+	155	-27	155	-27	18	898	730	1
hsa-miR-4316	chr4_73956383_73958017_-	150	-20.94	150	-20.94	17	1634	489	1
hsa-miR-4316	chr1_41536266_41541123_-	153	-25.78	153	-25.78	17	360	259	1
hsa-miR-4316	chr6_73005639_73043538_+	154	-23.61	154	-23.61	17	546	236	1
hsa-miR-4316	chr14_31596990_31602881_-	153	-20.96	153	-20.96	17	1403	1336	1
hsa-miR-4314	chr11_92085261_92088570_+	166	-22.53	166	-22.53	18	3309	3135	1
hsa-miR-4314	chr2_200233327_200298237_-	152	-21.97	152	-21.97	18	531	413	1
hsa-miR-4318	chr4_41015599_41016415_-	159	-20.91	159	-20.91	17	816	643	1
hsa-miR-4318	chr8_17570722_17581342_-	153	-21.09	153	-21.09	17	336	123	1
hsa-miR-4320	chr16_53288349_53308214_+	151	-20.52	151	-20.52	18	1106	835	1
hsa-miR-4322	chr21_36206706_36231875_-	158	-23.88	158	-23.88	21	297	194	1
hsa-miR-4322	chr7_97820039_97823884_+	153	-24.57	153	-24.57	21	3109	2993	1
hsa-miR-4322	chr5_65349233_65350779_+	151	-27.14	151	-27.14	21	1546	793	1
hsa-miR-4323	chr4_103225473_103236987_-	151	-22.74	151	-22.74	18	621	268	1
hsa-miR-4257	chr5_102432244_102433485_-	152	-23.59	152	-23.59	18	655	44	1
hsa-miR-4258	chr9_37424841_37426651_+	153	-32.96	153	-32.96	17	321	55	1
hsa-miR-4259	chr9_35546426_35548532_+	150	-21.98	150	-21.98	22	2106	497	1
hsa-miR-4259	chr8_141810557_141900868_-	158	-21.86	158	-21.86	22	1125	38	1
hsa-miR-4259	chr14_105412025_105412520_-	160	-28.93	160	-28.93	22	495	312	1
hsa-miR-4260	chr17_60061531_60062451_-	164	-27.83	164	-27.83	19	503	272	1
hsa-miR-4251	chr4_73956383_73958017_-	154	-20.45	154	-20.45	17	1634	1008	1
hsa-miR-4254	chr7_99621041_99621930_+	157	-20.56	157	-20.56	23	668	407	1
hsa-miR-4254	chr3_169694733_169706147_+	153	-22.15	153	-22.15	23	585	306	1
hsa-miR-4252	chr1_227192694_227204751_-	150	-21.21	150	-21.21	19	546	521	1
hsa-miR-4252	chr2_8910799_8917022_-	150	-23.34	150	-23.34	19	308	207	1
hsa-miR-4252	chr7_97820039_97823884_+	151	-22.87	151	-22.87	19	3109	867	1
hsa-miR-4252	chr14_31596990_31602881_-	158	-20.55	158	-20.55	19	1403	436	1
hsa-miR-4326	chr10_126631025_126631876_+	160	-20.84	160	-20.84	20	851	750	1
hsa-miR-4326	chr9_35546426_35548532_+	157	-20.95	157	-20.95	20	2106	1446	1
hsa-miR-4326	chr7_65705311_65706257_+	157	-20.71	157	-20.71	20	946	195	1
hsa-miR-4326	chr7_65705311_65751696_+	157	-20.71	157	-20.71	20	1145	195	1
hsa-miR-4327	chrX_147743428_147744289_+	161	-21.41	161	-21.41	19	861	546	1
hsa-miR-4327	chr7_65705311_65706257_+	165	-25.01	165	-25.01	19	946	503	1
hsa-miR-4327	chr7_65705311_65751696_+	165	-25.01	165	-25.01	19	1145	503	1
hsa-miR-4327	chr4_106155053_106158508_+	150	-20.52	150	-20.52	19	3455	2994	1
hsa-miR-4327	chr14_31596990_31602881_-	158	-23.35	158	-23.35	19	1403	745	1
hsa-miR-4261	chr8_17601112_17613470_-	155	-25.66	155	-25.66	16	2441	2342	1
hsa-miR-4265	chr12_95602618_95605043_-	151	-25.07	151	-25.07	19	2425	574	1
hsa-miR-4265	chr19_13039155_13039661_-	153	-35.42	153	-35.42	19	338	64	1
hsa-miR-4265	chr7_97820039_97823884_+	152	-24.24	152	-24.24	19	3109	2995	1
hsa-miR-4265	chr14_31596990_31602881_-	152	-25.61	152	-25.61	19	1403	291	1
hsa-miR-4267	chr9_35546426_35548532_+	309	-46.2	156	-25.88	16	2106	228 1720	2
hsa-miR-2355-5p	chr11_92085261_92088570_+	178	-29.61	178	-29.61	21	3309	918	1
hsa-miR-2355-5p	chr4_73956383_73958017_-	151	-20.55	151	-20.55	21	1634	1464	1
hsa-miR-2355-5p	chr22_32874967_32875262_+	167	-21.52	167	-21.52	21	295	74	1
hsa-miR-2355-5p	chr14_31596990_31602881_-	155	-20.46	155	-20.46	21	1403	824	1
hsa-miR-2355-3p	chr13_76195898_76335174_+	153	-26.38	153	-26.38	22	652	263	1
hsa-miR-2355-3p	chr4_106155053_106158508_+	159	-25.24	159	-25.24	22	3455	1512	1
hsa-miR-2355-3p	chr10_32832227_32873232_+	157	-20.76	157	-20.76	22	597	378	1
hsa-miR-2355-3p	chr10_32854485_32873232_+	157	-20.76	157	-20.76	22	536	8	1
hsa-miR-2355-3p	chr8_17601112_17613470_-	155	-20.96	155	-20.96	22	2441	1339	1
hsa-miR-2355-3p	chr3_100565215_100581229_-	158	-23.1	158	-23.1	22	513	188	1
hsa-miR-2355-3p	chr3_100565215_100570784_-	158	-23.1	158	-23.1	22	438	113	1
hsa-miR-4268	chr3_18419661_18462483_-	155	-22.65	155	-22.65	21	1599	288	1
hsa-miR-4268	chr7_30590251_30601744_-	160	-27.7	160	-27.7	21	308	97	1
hsa-miR-4268	chr12_95602618_95605043_-	161	-22.54	161	-22.54	21	2425	513	1
hsa-miR-4268	chr6_131276244_131277639_-	155	-22.53	155	-22.53	21	719	561	1
hsa-miR-4268	chr6_131247744_131277639_-	155	-22.53	155	-22.53	21	824	561	1
hsa-miR-4268	chr6_73005639_73043538_+	152	-20.12	152	-20.12	21	546	32	1
hsa-miR-4268	chr17_67124759_67130883_-	154	-27.11	154	-27.11	21	659	115	1
hsa-miR-4269	chr14_89041036_89044484_+	173	-31.16	173	-31.16	21	418	127	1
hsa-miR-4269	chr4_73956383_73958017_-	163	-25.34	163	-25.34	21	1634	220	1
hsa-miR-4269	chr11_89133184_89135710_-	153	-20.03	153	-20.03	21	445	232	1
hsa-miR-4264	chr3_18419661_18462483_-	158	-20.15	158	-20.15	17	1599	8	1
hsa-miR-4270	chr21_36206706_36231875_-	157	-27.47	157	-27.47	20	297	233	1
hsa-miR-4270	chr9_35546426_35548532_+	160	-23.77	160	-23.77	20	2106	269	1
hsa-miR-4270	chr16_31102095_31102663_-	154	-24.59	154	-24.59	20	501	31	1
hsa-miR-4270	chr7_30590251_30601744_-	151	-22.3	151	-22.3	20	308	27	1
hsa-miR-4270	chr7_97820039_97823884_+	151	-27.77	151	-27.77	20	3109	1984	1
hsa-miR-4271	chr5_131013395_131044965_-	157	-24.91	157	-24.91	19	813	95	1
hsa-miR-4271	chr3_169694733_169706147_+	154	-28.69	154	-28.69	19	585	482	1
hsa-miR-4271	chr9_14120438_14179779_-	152	-26.23	152	-26.23	19	683	421	1
hsa-miR-4276	chr8_17601112_17613470_-	154	-23.31	154	-23.31	17	2441	1256	1
hsa-miR-4281	chr19_13039155_13039661_-	151	-22.51	151	-22.51	18	338	94	1
hsa-miR-4281	chr3_112968568_112969680_+	151	-30.36	151	-30.36	18	457	334	1
hsa-miR-4283	chr4_41015599_41016415_-	150	-22.48	150	-22.48	17	816	338	1
hsa-miR-4284	chr9_35546426_35548532_+	154	-25.5	154	-25.5	18	2106	410	1
hsa-miR-4290	chr17_2297336_2298748_-	168	-26.17	168	-26.17	19	734	610	1
hsa-miR-4290	chr5_65349233_65350779_+	155	-21.99	155	-21.99	19	1546	537	1
hsa-miR-4291	chr7_97820039_97823884_+	154	-22.26	154	-22.26	16	3109	1702	1
hsa-miR-4329	chr1_154207066_154207767_+	151	-21.17	151	-21.17	19	298	21	1
hsa-miR-500b-3p	chr19_17212469_17213367_+	150	-24.9	150	-24.9	20	898	865	1
hsa-miR-500b-3p	chr5_131013395_131044965_-	152	-24.08	152	-24.08	20	813	675	1
hsa-miR-500b-3p	chr3_112968568_112969680_+	150	-21.93	150	-21.93	20	457	313	1
hsa-miR-3605-5p	chr11_92085261_92088570_+	164	-22.06	164	-22.06	23	3309	55	1
hsa-miR-3605-5p	chr18_77170402_77171501_+	164	-20.88	164	-20.88	23	1099	1	1
hsa-miR-3605-5p	chr5_176963358_176966148_-	163	-25.2	163	-25.2	23	866	306	1
hsa-miR-3605-5p	chr7_97820039_97823884_+	304	-43.6	154	-22.32	23	3109	2947 1702	2
hsa-miR-3605-5p	chr9_111812562_111812972_-	157	-20.79	157	-20.79	23	269	60	1
hsa-miR-3605-5p	chr4_48371865_48396670_+	158	-27.6	158	-27.6	23	971	242	1
hsa-miR-3605-3p	chr3_114069120_114070725_-	157	-22.18	157	-22.18	23	1605	465	1
hsa-miR-3607-5p	chr4_62800557_62910267_+	164	-21.38	164	-21.38	22	1702	768	1
hsa-miR-3610	chr7_97820039_97823884_+	150	-20.51	150	-20.51	20	3109	505	1
hsa-miR-3612	chr9_35546426_35548532_+	159	-25.41	159	-25.41	22	2106	1966	1
hsa-miR-3612	chr4_106155053_106158508_+	154	-20.09	154	-20.09	22	3455	882	1
hsa-miR-3612	chr1_243776972_244006584_-	155	-22.6	155	-22.6	22	808	322	1
hsa-miR-3612	chr1_243708811_244006584_-	155	-22.6	155	-22.6	22	1363	322	1
hsa-miR-3612	chr17_58012553_58018304_+	159	-21.26	159	-21.26	22	357	51	1
hsa-miR-3614-5p	chr3_100565215_100581229_-	155	-21.74	155	-21.74	23	513	205	1
hsa-miR-3614-5p	chr3_100565215_100570784_-	155	-21.74	155	-21.74	23	438	130	1
hsa-miR-3614-3p	chr3_18419661_18462483_-	150	-21.32	150	-21.32	23	1599	136	1
hsa-miR-3614-3p	chr14_89041036_89044484_+	159	-20.46	159	-20.46	23	418	188	1
hsa-miR-3614-3p	chr7_97820039_97823884_+	155	-20.18	155	-20.18	23	3109	475	1
hsa-miR-3614-3p	chr5_65349233_65350779_+	157	-22.99	157	-22.99	23	1546	534	1
hsa-miR-3614-3p	chr2_24357988_24369956_+	152	-24.59	152	-24.59	23	587	323	1
hsa-miR-3614-3p	chr16_53288349_53308214_+	160	-20.2	160	-20.2	23	1106	966	1
hsa-miR-3615	chr10_128768965_128788867_+	150	-22.19	150	-22.19	21	427	229	1
hsa-miR-3615	chr3_114069120_114070725_-	161	-27.94	161	-27.94	21	1605	886	1
hsa-miR-3616-3p	chr9_4286037_4286523_-	169	-27.18	169	-27.18	23	486	268	1
hsa-miR-3616-3p	chr9_128419929_128434922_-	150	-21.16	150	-21.16	23	567	495	1
hsa-miR-3616-3p	chr11_89165951_89185063_-	163	-24.63	163	-24.63	23	395	207	1
hsa-miR-3616-3p	chr7_24663284_24690331_+	153	-24.75	153	-24.75	23	653	18	1
hsa-miR-3616-3p	chr11_89155069_89185063_-	163	-24.63	163	-24.63	23	476	207	1
hsa-miR-3619-5p	chr12_122825299_122826244_-	152	-21.24	152	-21.24	22	945	92	1
hsa-miR-3619-5p	chr4_41015599_41016415_-	163	-32.74	163	-32.74	22	816	234	1
hsa-miR-3619-5p	chr19_17212469_17213367_+	151	-20.47	151	-20.47	22	898	367	1
hsa-miR-3619-5p	chr9_35546426_35548532_+	151	-22.84	151	-22.84	22	2106	1973	1
hsa-miR-3619-5p	chr4_73956383_73958017_-	155	-26.68	155	-26.68	22	1634	341	1
hsa-miR-3619-5p	chr5_176963358_176966148_-	161	-25.63	161	-25.63	22	866	24	1
hsa-miR-3619-5p	chr1_171537385_171544267_+	150	-22.03	150	-22.03	22	397	348	1
hsa-miR-3619-3p	chr9_4286037_4286523_-	151	-32.74	151	-32.74	22	486	147	1
hsa-miR-3619-3p	chr5_65349233_65350779_+	159	-25.27	159	-25.27	22	1546	1306	1
hsa-miR-3620-5p	chr21_36206706_36231875_-	301	-67.91	151	-35.38	22	297	189 207	2
hsa-miR-3620-5p	chr17_2297336_2298748_-	160	-30.28	160	-30.28	22	734	242	1
hsa-miR-3620-5p	chr4_41015599_41016415_-	616	-117.28	157	-33.42	22	816	651 427 615 57	4
hsa-miR-3620-5p	chr9_35546426_35548532_+	464	-95.71	160	-36.58	22	2106	490 1398 1591	3
hsa-miR-3620-5p	chr8_22054192_22054933_+	151	-37.77	151	-37.77	22	342	40	1
hsa-miR-3620-5p	chr12_12022357_12022903_+	155	-36.08	155	-36.08	22	546	332	1
hsa-miR-3620-5p	chr12_95602618_95605043_-	150	-30.15	150	-30.15	22	2425	581	1
hsa-miR-3620-5p	chr4_73956383_73958017_-	160	-27.2	160	-27.2	22	1634	806	1
hsa-miR-3620-5p	chr19_13039155_13039661_-	153	-35.36	153	-35.36	22	338	289	1
hsa-miR-3620-5p	chr7_97820039_97823884_+	152	-26.17	152	-26.17	22	3109	1509	1
hsa-miR-3620-5p	chr22_32874967_32875262_+	154	-23	154	-23	22	295	248	1
hsa-miR-3620-5p	chr3_100565215_100581229_-	153	-26.15	153	-26.15	22	513	471	1
hsa-miR-3620-5p	chr3_100565215_100570784_-	153	-26.15	153	-26.15	22	438	396	1
hsa-miR-3620-3p	chr5_176963358_176966148_-	158	-28.01	158	-28.01	22	866	88	1
hsa-miR-3622a-5p	chr21_36206706_36231875_-	155	-22.69	155	-22.69	22	297	225	1
hsa-miR-3622a-5p	chr18_77170402_77171501_+	155	-25.89	155	-25.89	22	1099	365	1
hsa-miR-3622a-3p	chr3_18419661_18462483_-	152	-29.61	152	-29.61	22	1599	152	1
hsa-miR-3622a-3p	chr4_73956383_73958017_-	150	-21.19	150	-21.19	22	1634	530	1
hsa-miR-3622a-3p	chr7_33388679_33427756_+	151	-20.14	151	-20.14	22	786	375	1
hsa-miR-3622b-5p	chr1_227192694_227204751_-	157	-23.02	157	-23.02	20	546	225	1
hsa-miR-3622b-5p	chr9_35546426_35548532_+	164	-29.2	164	-29.2	20	2106	1877	1
hsa-miR-3622b-5p	chr3_183361267_183369064_+	157	-25.64	157	-25.64	20	1044	252	1
hsa-miR-3622b-3p	chr17_80521229_80526077_+	155	-20.53	155	-20.53	21	343	309	1
hsa-miR-3622b-3p	chr4_73956383_73958017_-	158	-24.89	158	-24.89	21	1634	531	1
hsa-miR-3622b-3p	chr3_3197902_3215945_-	151	-20.35	151	-20.35	21	576	45	1
hsa-miR-3648	chr18_77170402_77171501_+	162	-30.95	162	-30.95	21	1099	559	1
hsa-miR-3649	chr17_80521229_80526077_+	153	-22.82	153	-22.82	19	343	1	1
hsa-miR-3649	chr7_97820039_97823884_+	155	-21.68	155	-21.68	19	3109	1636	1
hsa-miR-3649	chr7_99621041_99621930_+	154	-22.96	154	-22.96	19	668	503	1
hsa-miR-3650	chr7_99621041_99621930_+	152	-23.66	152	-23.66	19	668	213	1
hsa-miR-3651	chr9_35546426_35548532_+	159	-28.38	159	-28.38	24	2106	875	1
hsa-miR-3652	chr17_80521229_80526077_+	156	-24.45	156	-24.45	18	343	205	1
hsa-miR-3652	chr5_176963358_176966148_-	160	-26.49	160	-26.49	18	866	3	1
hsa-miR-3652	chr11_120343758_120348235_+	164	-27.22	164	-27.22	18	577	24	1
hsa-miR-3652	chr3_112968568_112969680_+	154	-26.65	154	-26.65	18	457	186	1
hsa-miR-3652	chr1_171537385_171544267_+	154	-20.39	154	-20.39	18	397	138	1
hsa-miR-3652	chr9_14120438_14179779_-	155	-23.45	155	-23.45	18	683	553	1
hsa-miR-3653-3p	chr7_33388679_33427756_+	162	-22.35	162	-22.35	18	786	335	1
hsa-miR-3655	chr11_120343758_120348235_+	151	-20.21	151	-20.21	21	577	294	1
hsa-miR-3655	chr3_114069120_114070725_-	158	-23.35	158	-23.35	21	1605	1143	1
hsa-miR-3656	chr19_13039155_13039661_-	150	-27.06	150	-27.06	17	338	161	1
hsa-miR-3657	chr3_183361267_183369064_+	158	-25.37	158	-25.37	21	1044	126	1
hsa-miR-3660	chr2_190593385_190609514_+	158	-21	158	-21	21	1026	171	1
hsa-miR-3660	chr4_103225473_103236987_-	163	-21.61	163	-21.61	21	621	168	1
hsa-miR-3661	chr13_76195898_76335174_+	150	-25.24	150	-25.24	22	652	66	1
hsa-miR-3661	chr9_4286037_4286523_-	154	-25.02	154	-25.02	22	486	377	1
hsa-miR-3661	chr9_35546426_35548532_+	152	-23.21	152	-23.21	22	2106	1937	1
hsa-miR-3661	chr12_12022357_12022903_+	150	-26.88	150	-26.88	22	546	66	1
hsa-miR-3661	chr7_99621041_99621930_+	316	-52.6	158	-28.1	22	668	407 504	2
hsa-miR-3662	chr16_53175090_53191453_+	172	-21.24	172	-21.24	24	1616	1544	1
hsa-miR-3663-5p	chr3_171969049_171979873_+	153	-24.34	153	-24.34	21	282	30	1
hsa-miR-3663-5p	chr4_106155053_106158508_+	151	-24.45	151	-24.45	21	3455	3110	1
hsa-miR-3663-5p	chr3_114069120_114070725_-	150	-26.36	150	-26.36	21	1605	1387	1
hsa-miR-3663-5p	chr22_32874967_32875262_+	150	-27.51	150	-27.51	21	295	200	1
hsa-miR-3663-5p	chr8_17601112_17613470_-	159	-27.17	159	-27.17	21	2441	1748	1
hsa-miR-3663-5p	chr19_4511522_4511918_-	158	-21.94	158	-21.94	21	396	81	1
hsa-miR-3663-3p	chr14_31596990_31602881_-	154	-21.6	154	-21.6	23	1403	1182	1
hsa-miR-3664-3p	chr9_35546426_35548532_+	167	-21.31	167	-21.31	22	2106	1145	1
hsa-miR-3664-3p	chr11_103173821_103194718_+	163	-24.25	163	-24.25	22	944	434	1
hsa-miR-3664-3p	chr14_31596990_31602881_-	160	-29.44	160	-29.44	22	1403	824	1
hsa-miR-3665	chr19_17212469_17213367_+	152	-23.12	152	-23.12	18	898	100	1
hsa-miR-3665	chr8_141810557_141900868_-	158	-28.6	158	-28.6	18	1125	285	1
hsa-miR-3665	chr5_176963358_176966148_-	156	-26.51	156	-26.51	18	866	606	1
hsa-miR-3665	chr3_100565215_100581229_-	150	-26.3	150	-26.3	18	513	274	1
hsa-miR-3665	chr3_100565215_100570784_-	150	-26.3	150	-26.3	18	438	199	1
hsa-miR-3666	chr13_61013821_61041513_+	151	-20.63	151	-20.63	21	454	15	1
hsa-miR-3667-5p	chr16_53175090_53191453_+	155	-24.24	155	-24.24	22	1616	1384	1
hsa-miR-3667-3p	chr11_92085261_92088570_+	304	-47.86	154	-24.17	22	3309	264 989	2
hsa-miR-3667-3p	chr3_18419661_18462483_-	160	-26.64	160	-26.64	22	1599	136	1
hsa-miR-3667-3p	chr8_22332466_22333137_+	154	-20.27	154	-20.27	22	323	78	1
hsa-miR-3667-3p	chr9_35546426_35548532_+	153	-21.14	153	-21.14	22	2106	1104	1
hsa-miR-3670	chr12_122825299_122826244_-	157	-24.59	157	-24.59	24	945	57	1
hsa-miR-3670	chr4_106155053_106158508_+	159	-23.06	159	-23.06	24	3455	483	1
hsa-miR-3670	chr14_31596990_31602881_-	158	-22.16	158	-22.16	24	1403	989	1
hsa-miR-3675-5p	chr3_114069120_114070725_-	150	-24.39	150	-24.39	23	1605	535	1
hsa-miR-3677-5p	chr11_92085261_92088570_+	164	-23.35	164	-23.35	22	3309	81	1
hsa-miR-3677-5p	chr6_118832460_118887479_-	162	-21.99	162	-21.99	22	1025	205	1
hsa-miR-3677-5p	chr3_114069120_114070725_-	152	-22.61	152	-22.61	22	1605	85	1
hsa-miR-3677-3p	chr11_92085261_92088570_+	150	-25.35	150	-25.35	22	3309	2881	1
hsa-miR-3677-3p	chr9_37424841_37426651_+	159	-37.08	159	-37.08	22	321	58	1
hsa-miR-3677-3p	chr10_34558584_34573173_-	166	-32.74	166	-32.74	22	354	260	1
hsa-miR-3678-3p	chr7_97820039_97823884_+	155	-23.16	155	-23.16	22	3109	2292	1
hsa-miR-3678-3p	chr3_114069120_114070725_-	153	-27.32	153	-27.32	22	1605	291	1
hsa-miR-3679-5p	chr9_35546426_35548532_+	153	-21.11	153	-21.11	23	2106	505	1
hsa-miR-3679-5p	chr4_73956383_73958017_-	172	-26.61	172	-26.61	23	1634	310	1
hsa-miR-3679-5p	chr21_37619814_37620866_+	153	-33.29	153	-33.29	23	301	196	1
hsa-miR-3679-5p	chr1_114372213_114377061_-	153	-22.61	153	-22.61	23	356	14	1
hsa-miR-3680-5p	chr14_31596990_31602881_-	161	-20.32	161	-20.32	22	1403	960	1
hsa-miR-3681-3p	chr3_112968568_112969680_+	156	-20.67	156	-20.67	22	457	220	1
hsa-miR-3682-3p	chr8_141810557_141900868_-	151	-20.35	151	-20.35	21	1125	181	1
hsa-miR-3685	chr16_31733946_31734674_+	151	-22.98	151	-22.98	22	223	33	1
hsa-miR-3687	chr3_18419661_18462483_-	159	-22.68	159	-22.68	24	1599	891	1
hsa-miR-3688-3p	chr1_243708811_244006584_-	163	-23.42	163	-23.42	22	1363	798	1
hsa-miR-3688-3p	chr1_215749243_215752480_+	154	-20.94	154	-20.94	22	352	173	1
hsa-miR-3689a-5p	chr16_53175090_53191453_+	174	-21.79	174	-21.79	22	1616	992	1
hsa-miR-3689a-5p	chr1_243776972_244006584_-	154	-21.4	154	-21.4	22	808	50	1
hsa-miR-3689a-5p	chr1_243708811_244006584_-	154	-21.4	154	-21.4	22	1363	50	1
hsa-miR-3689a-3p	chr4_41015599_41016415_-	326	-52.77	167	-28.31	22	816	153 423	2
hsa-miR-3689a-3p	chr8_22054192_22054933_+	171	-35.03	171	-35.03	22	342	244	1
hsa-miR-3689a-3p	chr4_106155053_106158508_+	171	-26.75	171	-26.75	22	3455	95	1
hsa-miR-3689a-3p	chr7_99621041_99621930_+	161	-24.92	161	-24.92	22	668	13	1
hsa-miR-3691-5p	chr19_17212469_17213367_+	162	-23.21	162	-23.21	23	898	801	1
hsa-miR-3691-5p	chr4_73956383_73958017_-	155	-20.11	155	-20.11	23	1634	237	1
hsa-miR-3691-5p	chr1_41536266_41541123_-	160	-26.19	160	-26.19	23	360	40	1
hsa-miR-3691-3p	chr3_18419661_18462483_-	155	-21.01	155	-21.01	22	1599	141	1
hsa-miR-3691-3p	chr9_35546426_35548532_+	163	-23.63	163	-23.63	22	2106	415	1
hsa-miR-3691-3p	chr21_38792600_38802702_+	150	-20.17	150	-20.17	22	86	46	1
hsa-miR-3692-5p	chr12_122825299_122826244_-	156	-27.12	156	-27.12	24	945	381	1
hsa-miR-3692-5p	chr3_18419661_18462483_-	316	-43.79	166	-23.47	24	1599	991 961	2
hsa-miR-3692-5p	chr17_2297336_2298748_-	163	-28.94	163	-28.94	24	734	324	1
hsa-miR-3692-5p	chr4_41015599_41016415_-	157	-27.41	157	-27.41	24	816	21	1
hsa-miR-3692-5p	chr18_77170402_77171501_+	162	-23.69	162	-23.69	24	1099	378	1
hsa-miR-3692-5p	chr4_106155053_106158508_+	303	-45.81	153	-22.98	24	3455	1095 1618	2
hsa-miR-3692-5p	chr7_97820039_97823884_+	160	-26.1	160	-26.1	24	3109	1711	1
hsa-miR-3692-5p	chr3_114069120_114070725_-	155	-23.52	155	-23.52	24	1605	1386	1
hsa-miR-3692-5p	chr1_185183638_185200840_+	156	-21.81	156	-21.81	24	469	258	1
hsa-miR-3692-5p	chr6_73005639_73043538_+	160	-24.05	160	-24.05	24	546	220	1
hsa-miR-3692-5p	chr8_17601112_17613470_-	159	-20.49	159	-20.49	24	2441	259	1
hsa-miR-3692-5p	chr5_131013395_131044965_-	152	-20.37	152	-20.37	24	813	122	1
hsa-miR-3692-5p	chr14_31596990_31602881_-	150	-20.49	150	-20.49	24	1403	1254	1
hsa-miR-3692-5p	chr3_169694733_169706147_+	167	-25.11	167	-25.11	24	585	488	1
hsa-miR-3692-5p	chr4_103225473_103236987_-	160	-21.27	160	-21.27	24	621	68	1
hsa-miR-3692-3p	chr12_95602618_95605043_-	170	-22.34	170	-22.34	24	2425	1665	1
hsa-miR-3692-3p	chr4_62800557_62910267_+	152	-20.54	152	-20.54	24	1702	658	1
hsa-miR-3692-3p	chr4_103225473_103236987_-	153	-24.8	153	-24.8	24	621	589	1
hsa-miR-3713	chr1_41536266_41541123_-	161	-24.55	161	-24.55	20	360	282	1
hsa-miR-3714	chr19_22157530_22171711_-	168	-25.67	168	-25.67	22	302	120	1
hsa-miR-3180	chr7_99621041_99621930_+	151	-23.85	151	-23.85	19	668	435	1
hsa-miR-3907	chr5_176963358_176966148_-	159	-23.86	159	-23.86	22	866	484	1
hsa-miR-3907	chr7_97820039_97823884_+	153	-21.67	153	-21.67	22	3109	1398	1
hsa-miR-3689b-5p	chr16_53175090_53191453_+	174	-21.79	174	-21.79	22	1616	992	1
hsa-miR-3689b-5p	chr1_243776972_244006584_-	154	-21.4	154	-21.4	22	808	50	1
hsa-miR-3689b-5p	chr1_243708811_244006584_-	154	-21.4	154	-21.4	22	1363	50	1
hsa-miR-3689b-3p	chr4_41015599_41016415_-	326	-47.74	171	-25.74	22	816	154 423	2
hsa-miR-3689b-3p	chr8_22054192_22054933_+	167	-32.47	167	-32.47	22	342	244	1
hsa-miR-3689b-3p	chr4_106155053_106158508_+	167	-22.41	167	-22.41	22	3455	95	1
hsa-miR-3689b-3p	chr7_97820039_97823884_+	156	-26.31	156	-26.31	22	3109	2190	1
hsa-miR-3689b-3p	chr7_99621041_99621930_+	168	-26.71	168	-26.71	22	668	13	1
hsa-miR-3909	chr6_118832460_118887479_-	151	-21.83	151	-21.83	22	1025	396	1
hsa-miR-3909	chr19_17212469_17213367_+	155	-21.45	155	-21.45	22	898	850	1
hsa-miR-3909	chr12_12022357_12022903_+	155	-22.41	155	-22.41	22	546	2	1
hsa-miR-3909	chr2_8910799_8917022_-	151	-22.15	151	-22.15	22	308	13	1
hsa-miR-3911	chr18_77170402_77171501_+	156	-24.18	156	-24.18	22	1099	81	1
hsa-miR-3912-5p	chr4_186168447_186188309_+	160	-20.88	160	-20.88	21	662	51	1
hsa-miR-3913-5p	chrX_147743428_147744289_+	158	-26.39	158	-26.39	22	861	371	1
hsa-miR-3913-5p	chr4_106155053_106158508_+	178	-27.95	178	-27.95	22	3455	1958	1
hsa-miR-3913-3p	chr3_183361267_183369064_+	162	-20.71	162	-20.71	22	1044	1004	1
hsa-miR-3915	chr7_24663284_24690331_+	166	-22.92	166	-22.92	22	653	58	1
hsa-miR-3915	chr3_100565215_100581229_-	175	-20.52	175	-20.52	22	513	224	1
hsa-miR-3915	chr3_100565215_100570784_-	175	-20.52	175	-20.52	22	438	149	1
hsa-miR-3916	chrX_147743428_147744289_+	151	-25.71	151	-25.71	26	861	566	1
hsa-miR-3916	chr8_13356557_13357705_-	156	-22.24	156	-22.24	26	1148	403	1
hsa-miR-3916	chr6_118832460_118887479_-	159	-27.73	159	-27.73	26	1025	478	1
hsa-miR-3916	chr12_129299319_129299615_-	153	-22.08	153	-22.08	26	296	150	1
hsa-miR-3916	chr18_77170402_77171501_+	159	-23.06	159	-23.06	26	1099	155	1
[truncated: 2,716 more rows]
